# Supplementary material for: A database of glacier prokaryotic genomes and genes for the Three Poles
Source: Copernicus journal article supplement (doi:10.5194/essd-17-5165-2025), 2025-10-07
Supplement: Supplementary file 1 [file supplementary file.xlsx]

## Sheet: Sheet1
List of supplementary Tables
Table S1 Sampling site of amplicon sequencing data
Table S2 Bioproject information on amplicon sequencing data
Table S3 Site description of metegenome data
Table S4 Information of genomes from Cultivated bacteria
Table S7 The diversity of prokaryotic communities
Table S8 Comparison of prokaryotic diversity among habitat-region pairs
Table S9 the influence bioproject, primers, and amplified region, and sequencing platform on the diversity index for each habitat within a region
Table S10 Comparison of the alpha diversity indices by habitats using primers that targeting different hypervariable regions
Table S11 Taxonomy data of global glacier microbiome at the phylum level
Table S12 Taxonomy data of global glacier microbiome at the class level
Table S13 Top 3 most abundant OTUs for each habitat-region pair
Table S14 The taxonomy of ubiquitous phylotypes for each habitat-region pair
Table S15 Information on the bins and isolates genomes obtains from glacier metagenomes
Table S16 Taxonomy of bins with antibiotic resistance genes
Table S17 Taxonomy of the bins with virulence factor genes identified

## Sheet: Table S1
Table S1 Sampling site of amplicon sequencing data
ID	SRA ID	BioProject	reads	OTU	BioSample	Collection_Date	Instrument	Sampling location	Continent	Location name	BioSample id	Environmental medium	BioSample	Latitude	Longitude	Region classification
PRJNA629965Sample77	SRR11669262	PRJNA629965	30863	383	SAMN14814872	2016-10-09	Illumina MiSeq	USA	North America	USA: Oregon	SAMN14814872	High algal biomass ice	SAMN14814872	45.3853	-121.671	Other alpine regions
PRJNA629965Sample75	SRR11669273	PRJNA629965	38568	995	SAMN14814871	2016-10-09	Illumina MiSeq	USA	North America	USA: Oregon	SAMN14814871	High algal biomass ice	SAMN14814871	45.3853	-121.671	Other alpine regions
PRJNA629965Sample19	SRR11669284	PRJNA629965	16332	320	SAMN14814870	2016-10-09	Illumina MiSeq	USA	North America	USA: Oregon	SAMN14814870	High algal biomass ice	SAMN14814870	45.3853	-121.671	Other alpine regions
PRJNA629965Sample28	SRR11669298	PRJNA629965	47019	646	SAMN14814884	2017-07-28	Illumina MiSeq	USA	North America	USA: Oregon	SAMN14814884	High algal biomass ice	SAMN14814884	45.3898	-121.658	Other alpine regions
PRJNA629965Sample61	SRR11669306	PRJNA629965	36227	998	SAMN14814956	2017-08-08	Illumina MiSeq	USA	North America	USA: Montana	SAMN14814956	High algal biomass ice	SAMN14814956	48.7536	-113.725	Other alpine regions
PRJNA629965Sample66	SRR11669307	PRJNA629965	41444	985	SAMN14814955	2017-08-08	Illumina MiSeq	USA	North America	USA: Montana	SAMN14814955	High algal biomass ice	SAMN14814955	48.7536	-113.725	Other alpine regions
PRJEB14999Sample35	ERR1553718	PRJEB14999	12491	1377	SAMEA4360887	2014	Illumina MiSeq	Greenland	North America	Southwest Greenland ice sheet	SAMEA4360887	High algal biomass ice	SAMEA4360887	67.0666	-49.3833	Arctic
PRJEB14999Sample109	ERR1553729	PRJEB14999	11997	1379	SAMEA4360898	2014	Illumina MiSeq	Greenland	North America	Southwest Greenland ice sheet	SAMEA4360898	High algal biomass ice	SAMEA4360898	67.0666	-49.3833	Arctic
PRJEB14999Sample27	ERR1553742	PRJEB14999	11778	1307	SAMEA4360911	2014	Illumina MiSeq	Greenland	North America	Southwest Greenland ice sheet	SAMEA4360911	High algal biomass ice	SAMEA4360911	67.0666	-49.3833	Arctic
PRJEB14999Sample100	ERR1553749	PRJEB14999	11102	1160	SAMEA4360918	2014	Illumina MiSeq	Greenland	North America	Southwest Greenland ice sheet	SAMEA4360918	High algal biomass ice	SAMEA4360918	67.0666	-49.3833	Arctic
PRJEB14999Sample48	ERR1553743	PRJEB14999	13960	1510	SAMEA4360912	2014	Illumina MiSeq	Greenland	North America	Southwest Greenland ice sheet	SAMEA4360912	High algal biomass ice	SAMEA4360912	67.0666	-49.3833	Arctic
PRJEB14999Sample118	ERR1553738	PRJEB14999	12570	1438	SAMEA4360907	2014	Illumina MiSeq	Greenland	North America	Southwest Greenland ice sheet	SAMEA4360907	High algal biomass ice	SAMEA4360907	67.0666	-49.3833	Arctic
PRJNA564214Sample57	SRR10080794	PRJNA564214	8423	117	SAMN12705728	2017-06-26	Illumina MiSeq	Greenland	North America	Greenland	SAMN12705728	High algal biomass ice	SAMN12705728	67.0764	-49.3435	Arctic
PRJNA564214Sample42	SRR10080795	PRJNA564214	8349	87	SAMN12705727	2017-06-25	Illumina MiSeq	Greenland	North America	Greenland	SAMN12705727	High algal biomass ice	SAMN12705727	67.0764	-49.3435	Arctic
PRJNA564214Sample64	SRR10080798	PRJNA564214	16740	147	SAMN12705724	2017-06-27	Illumina MiSeq	Greenland	North America	Greenland	SAMN12705724	High algal biomass ice	SAMN12705724	67.0764	-49.3435	Arctic
PRJNA564214Sample37	SRR10080800	PRJNA564214	7457	94	SAMN12705722	2017-06-25	Illumina MiSeq	Greenland	North America	Greenland	SAMN12705722	High algal biomass ice	SAMN12705722	67.0764	-49.3435	Arctic
PRJNA564214Sample46	SRR10080802	PRJNA564214	6079	43	SAMN12705720	2017-06-23	Illumina MiSeq	Greenland	North America	Greenland	SAMN12705720	High algal biomass ice	SAMN12705720	67.0782	-49.3433	Arctic
PRJNA564214Sample15	SRR10080748	PRJNA564214	10760	46	SAMN12705707	2016-08-05	Illumina MiSeq	Greenland	North America	Greenland	SAMN12705707	High algal biomass ice	SAMN12705707	67.1914	-48.6825	Arctic
PRJNA564214Sample29	SRR10080814	PRJNA564214	45668	452	SAMN12705701	2016-07-27	Illumina MiSeq	Greenland	North America	Greenland	SAMN12705701	High algal biomass ice	SAMN12705701	67.1922	-49.08	Arctic
PRJNA564214Sample49	SRR10080770	PRJNA564214	51812	612	SAMN12705705	2016-08-01	Illumina MiSeq	Greenland	North America	Greenland	SAMN12705705	High algal biomass ice	SAMN12705705	67.195	-49.4206	Arctic
PRJNA564214Sample71	SRR10080792	PRJNA564214	44554	539	SAMN12705703	2016-07-31	Illumina MiSeq	Greenland	North America	Greenland	SAMN12705703	High algal biomass ice	SAMN12705703	67.195	-49.4206	Arctic
PRJNA564214Sample5	SRR10080759	PRJNA564214	42533	625	SAMN12705706	2016-08-01	Illumina MiSeq	Greenland	North America	Greenland	SAMN12705706	High algal biomass ice	SAMN12705706	67.1972	-49.4292	Arctic
PRJNA564214Sample28	SRR10080781	PRJNA564214	42411	485	SAMN12705704	2016-07-31	Illumina MiSeq	Greenland	North America	Greenland	SAMN12705704	High algal biomass ice	SAMN12705704	67.1972	-49.4292	Arctic
PRJNA564214Sample53	SRR10080742	PRJNA564214	36610	411	SAMN12705708	2016-08-05	Illumina MiSeq	Greenland	North America	Greenland	SAMN12705708	High algal biomass ice	SAMN12705708	67.2186	-49.1567	Arctic
PRJNA564214Sample12	SRR10080815	PRJNA564214	50648	300	SAMN12705700	2016-07-27	Illumina MiSeq	Greenland	North America	Greenland	SAMN12705700	High algal biomass ice	SAMN12705700	67.2825	-48.68	Arctic
PRJNA384269Sample5	SRR5482953	PRJNA384269	25383	446	SAMN06833887	2016-06-22	Illumina MiSeq	Japan	Asia	Japan: Mount Asahi\, near Sugatami lake	SAMN06833887	High algal biomass ice	SAMN06833887	43.394	142.496	Other alpine regions
PRJNA384269Sample7	SRR5482955	PRJNA384269	88338	292	SAMN06833885	2016-06-22	Illumina MiSeq	Japan	Asia	Japan: Mount Asahi\, near Sugatami lake	SAMN06833885	High algal biomass ice	SAMN06833885	43.3939	142.495	Other alpine regions
PRJNA384269Sample8	SRR5482956	PRJNA384269	81465	217	SAMN06833884	2016-06-15	Illumina MiSeq	Japan	Asia	Japan: Mount Asahi\, near Sugatami lake	SAMN06833884	High algal biomass ice	SAMN06833884	43.3939	142.495	Other alpine regions
PRJNA384269Sample6	SRR5482954	PRJNA384269	73084	806	SAMN06833886	2016-06-22	Illumina MiSeq	Japan	Asia	Japan: Mount Asahi\, near Sugatami lake	SAMN06833886	High algal biomass ice	SAMN06833886	43.394	142.496	Other alpine regions
f892	SRR27784651	PRJNA1071093	15395	700	SAMN39671703	2017-01-01	Illumina MiSeq	uncalculated	uncalculated	Antarctica: Taylor Valley	SAMN39671703	High algal biomass ice	SAMN39671703	-77.5987	163.309	Antarctic
PRJNA564214Sample8	SRR10080803	PRJNA564214	36484	107	SAMN12705702	2016-07-27	Illumina MiSeq	Greenland	North America	Greenland	SAMN12705702	High algal biomass snow	SAMN12705702	67.2158	-49.0425	Arctic
PRJNA564214Sample38	SRR10080741	PRJNA564214	22154	79	SAMN12705709	2016-08-05	Illumina MiSeq	Greenland	North America	Greenland	SAMN12705709	High algal biomass snow	SAMN12705709	67.2289	-49.1231	Arctic
PRJNA564214Sample70	SRR10080809	PRJNA564214	44759	497	SAMN12705714	2016-08-02	Illumina MiSeq	Greenland	North America	Greenland	SAMN12705714	High algal biomass snow	SAMN12705714	67.2378	-49.4686	Arctic
PRJNA564214Sample1	SRR10080811	PRJNA564214	54811	673	SAMN12705712	2016-07-30	Illumina MiSeq	Greenland	North America	Greenland	SAMN12705712	High algal biomass snow	SAMN12705712	67.2603	-49.3528	Arctic
PRJNA282540Sample4	SRR2006325	PRJNA282540	274408	1155	SAMN03571239	2007-11-01	Illumina MiSeq	uncalculated	uncalculated	Antarctica: McMurdo Dry Valleys\, Taylor Glacier	SAMN03571239	banded basal ice	SAMN03571239	-77.72	-162.23	Antarctic
PRJNA282540Sample6	SRR2006330	PRJNA282540	108873	360	SAMN03571239	2007-11-01	Illumina MiSeq	uncalculated	uncalculated	Antarctica: McMurdo Dry Valleys\, Taylor Glacier	SAMN03571239	banded basal ice	SAMN03571239	-77.72	-162.23	Antarctic
PRJNA282540Sample15	SRR2006326	PRJNA282540	292796	611	SAMN03571252	2009-11-01	Illumina MiSeq	uncalculated	uncalculated	Antarctica: McMurdo Dry Valleys\, Taylor Glacier	SAMN03571252	banded basal ice	SAMN03571252	-77.72	-162.24	Antarctic
PRJNA282540Sample1	SRR2006332	PRJNA282540	52306	211	SAMN03571252	2009-11-01	Illumina MiSeq	uncalculated	uncalculated	Antarctica: McMurdo Dry Valleys\, Taylor Glacier	SAMN03571252	banded basal ice	SAMN03571252	-77.72	-162.24	Antarctic
PRJNA282540Sample12	SRR2006333	PRJNA282540	189861	340	SAMN03571252	2009-11-01	Illumina MiSeq	uncalculated	uncalculated	Antarctica: McMurdo Dry Valleys\, Taylor Glacier	SAMN03571252	banded basal ice	SAMN03571252	-77.72	-162.24	Antarctic
PRJNA282540Sample7	SRR2006338	PRJNA282540	206208	427	SAMN03571256	2007-11-01	Illumina MiSeq	uncalculated	uncalculated	Antarctica: McMurdo Dry Valleys\, Taylor Glacier	SAMN03571256	banded basal ice	SAMN03571256	-77.72	-162.23	Antarctic
PRJNA282540Sample10	SRR2006339	PRJNA282540	219339	308	SAMN03571256	2007-11-01	Illumina MiSeq	uncalculated	uncalculated	Antarctica: McMurdo Dry Valleys\, Taylor Glacier	SAMN03571256	banded basal ice	SAMN03571256	-77.72	-162.23	Antarctic
f261	SRR10084713	PRJNA564341	36866	272	SAMN12710442	2015-05-01	Illumina MiSeq	Canada	North America	Canada: Devon Ice Cap	SAMN12710442	Basal ice metagenome	SAMN12710442	75.5688	-81.5694	Arctic
f274	SRR10084726	PRJNA564341	21587	504	SAMN12710436	2015-05-01	Illumina MiSeq	Canada	North America	Canada: Devon Ice Cap	SAMN12710436	Basal ice metagenome	SAMN12710436	75.5688	-81.5694	Arctic
PRJNA282540Sample13	SRR2006327	PRJNA282540	123228	566	SAMN03571253	2007-11-01	Illumina MiSeq	uncalculated	uncalculated	Antarctica: McMurdo Dry Valleys\, Taylor Glacier	SAMN03571253	clean basal ice	SAMN03571253	-77.72	-162.23	Antarctic
PRJNA282540Sample2	SRR2006335	PRJNA282540	222881	496	SAMN03571253	2007-11-01	Illumina MiSeq	uncalculated	uncalculated	Antarctica: McMurdo Dry Valleys\, Taylor Glacier	SAMN03571253	clean basal ice	SAMN03571253	-77.72	-162.23	Antarctic
PRJNA282540Sample5	SRR2006336	PRJNA282540	61475	1044	SAMN03571253	2007-11-01	Illumina MiSeq	uncalculated	uncalculated	Antarctica: McMurdo Dry Valleys\, Taylor Glacier	SAMN03571253	clean basal ice	SAMN03571253	-77.72	-162.23	Antarctic
PRJNA282540Sample9	SRR2006337	PRJNA282540	167422	478	SAMN03571254	2009-11-01	Illumina MiSeq	uncalculated	uncalculated	Antarctica: McMurdo Dry Valleys\, Taylor Glacier	SAMN03571254	clean basal ice	SAMN03571254	-77.72	-162.24	Antarctic
f414	SRR13069519	PRJNA678168	5247	282	SAMN16789388	2015-04-01	Illumina MiSeq	Iceland	Europe	Iceland: Svnafellsjokull glacier	SAMN16789388	dispersed basal ice	SAMN16789388	63.991	-16.8686	Arctic
f424	SRR13069529	PRJNA678168	9543	114	SAMN16789416	2016-05-01	Illumina MiSeq	Iceland	Europe	Iceland: Svnafellsjokull glacier	SAMN16789416	dispersed basal ice	SAMN16789416	63.9915	-16.8724	Arctic
f425	SRR13069530	PRJNA678168	17401	174	SAMN16789414	2016-05-01	Illumina MiSeq	Iceland	Europe	Iceland: Svnafellsjokull glacier	SAMN16789414	dispersed basal ice	SAMN16789414	63.9915	-16.8724	Arctic
f429	SRR13069534	PRJNA678168	6891	256	SAMN16789408	2016-05-01	Illumina MiSeq	Iceland	Europe	Iceland: Svnafellsjokull glacier	SAMN16789408	dispersed basal ice	SAMN16789408	63.9915	-16.8724	Arctic
f422	SRR13069527	PRJNA678168	6695	368	SAMN16789384	2015-04-01	Illumina MiSeq	Iceland	Europe	Iceland: Svnafellsjokull glacier	SAMN16789384	dispersed basal ice	SAMN16789384	63.9933	-16.8748	Arctic
f426	SRR13069531	PRJNA678168	15089	171	SAMN16789412	2016-05-01	Illumina MiSeq	Iceland	Europe	Iceland: Svnafellsjokull glacier	SAMN16789412	dispersed basal ice	SAMN16789412	63.9988	-16.8764	Arctic
f427	SRR13069532	PRJNA678168	11363	540	SAMN16789410	2016-05-01	Illumina MiSeq	Iceland	Europe	Iceland: Svnafellsjokull glacier	SAMN16789410	dispersed basal ice	SAMN16789410	63.9988	-16.8764	Arctic
f421	SRR13069526	PRJNA678168	9775	328	SAMN16789420	2016-05-01	Illumina MiSeq	Iceland	Europe	Iceland: Skaftafellsjkull glacier	SAMN16789420	dispersed basal ice	SAMN16789420	64.0279	-16.9333	Arctic
f420	SRR13069525	PRJNA678168	15360	288	SAMN16789422	2016-05-01	Illumina MiSeq	Iceland	Europe	Iceland: Skaftafellsjkull glacier	SAMN16789422	dispersed basal ice	SAMN16789422	64.0281	-16.9332	Arctic
PRJNA282540Sample3	SRR2006328	PRJNA282540	241122	1512	SAMN03571257	2013-07-01	Illumina MiSeq	USA	North America	USA: Alaska\, Matanuska Valley	SAMN03571257	dispersed basal ice	SAMN03571257	61.78	-147.76	Arctic
PRJNA282540Sample14	SRR2006340	PRJNA282540	212148	622	SAMN03571257	2013-07-01	Illumina MiSeq	USA	North America	USA: Alaska\, Matanuska Valley	SAMN03571257	dispersed basal ice	SAMN03571257	61.78	-147.76	Arctic
PRJNA282540Sample11	SRR2006329	PRJNA282540	235675	799	SAMN03571255	2007-11-01	Illumina MiSeq	uncalculated	uncalculated	Antarctica: McMurdo Dry Valleys\, Taylor Glacier	SAMN03571255	solid basal ice	SAMN03571255	-77.72	-162.23	Antarctic
PRJNA282540Sample8	SRR2006341	PRJNA282540	159112	608	SAMN03571255	2007-11-01	Illumina MiSeq	uncalculated	uncalculated	Antarctica: McMurdo Dry Valleys\, Taylor Glacier	SAMN03571255	solid basal ice	SAMN03571255	-77.72	-162.23	Antarctic
f417	SRR13069522	PRJNA678168	6989	613	SAMN16789426	2016-05-01	Illumina MiSeq	Iceland	Europe	Iceland: Svnafellsjokull glacier	SAMN16789426	stratified basal ice	SAMN16789426	63.9915	-16.8724	Arctic
f419	SRR13069524	PRJNA678168	6415	138	SAMN16789424	2016-05-01	Illumina MiSeq	Iceland	Europe	Iceland: Svnafellsjokull glacier	SAMN16789424	stratified basal ice	SAMN16789424	63.9915	-16.8724	Arctic
f415	SRR13069520	PRJNA678168	12519	426	SAMN16789386	2015-04-01	Illumina MiSeq	Iceland	Europe	Iceland: Svnafellsjokull glacier	SAMN16789386	stratified basal ice	SAMN16789386	63.9933	-16.8748	Arctic
f436	SRR13069541	PRJNA678168	15118	364	SAMN16789394	2015-04-01	Illumina MiSeq	Iceland	Europe	Iceland: Svnafellsjokull glacier	SAMN16789394	stratified basal ice	SAMN16789394	63.9943	-16.8733	Arctic
f418	SRR13069523	PRJNA678168	10562	772	SAMN16789428	2016-05-01	Illumina MiSeq	Iceland	Europe	Iceland: Skaftafellsjkull glacier	SAMN16789428	stratified basal ice	SAMN16789428	63.9948	-6.8735	Arctic
f416	SRR13069521	PRJNA678168	13812	519	SAMN16789430	2016-05-01	Illumina MiSeq	Iceland	Europe	Iceland: Skaftafellsjkull glacier	SAMN16789430	stratified basal ice	SAMN16789430	64.0279	-16.9333	Arctic
f442	SRR13180842	PRJNA681925	31756	1669	SAMN16974616	2015/2016	Illumina MiSeq	Ecuador	South America	Ecuador	SAMN16974616	cryoconite	SAMN16974616	0.0173	-78.0045	Other alpine regions
f449	SRR13180849	PRJNA681925	46939	268	SAMN16974622	2015/2016	Illumina MiSeq	Ecuador	South America	Ecuador	SAMN16974622	cryoconite	SAMN16974622	0.0231	-77.9992	Other alpine regions
f451	SRR13180851	PRJNA681925	57624	417	SAMN16974620	2015/2016	Illumina MiSeq	Ecuador	South America	Ecuador	SAMN16974620	cryoconite	SAMN16974620	0.0242	-77.9985	Other alpine regions
f1253	SRR3667395	PRJNA322651	48865	1224	SAMN05179484	2009-12-15	Illumina MiSeq	uncalculated	Antarctica	Canada Glacier Cryoconite Hole Sediment1	SAMN05179484	Canada Glacier Cryoconite Hole Sediment1	SAMN05179484	-77.6156	162.971	Antarctic
f1264	SRR3667406	PRJNA322651	46678	1180	SAMN05179485	2010-12-12	Illumina MiSeq	uncalculated	Antarctica	Canada Glacier Cryoconite Hole Sediment2	SAMN05179485	Canada Glacier Cryoconite Hole Sediment2	SAMN05179485	-77.6156	162.971	Antarctic
f1275	SRR3667417	PRJNA322651	36266	972	SAMN05179486	2010-12-13	Illumina MiSeq	uncalculated	Antarctica	Canada Glacier Cryoconite Hole Sediment3	SAMN05179486	Canada Glacier Cryoconite Hole Sediment3	SAMN05179486	-77.6156	162.971	Antarctic
f1278	SRR3667420	PRJNA322651	40711	1070	SAMN05179487	2010-12-22	Illumina MiSeq	uncalculated	Antarctica	Canada Glacier Cryoconite Hole Sediment4	SAMN05179487	Canada Glacier Cryoconite Hole Sediment4	SAMN05179487	-77.6156	162.971	Antarctic
f802	SRR27784561	PRJNA1071093	23061	1537	SAMN39671683	2018-01-01	Illumina MiSeq	uncalculated	uncalculated	Antarctica: Taylor Valley	SAMN39671683	cDNA cryoconite1.1	SAMN39671683	-77.6101	162.955	Antarctic
PRJNA480849Sample10	SRR17376148	PRJNA480849	5351	604	SAMN24469052	2016-11-01	Illumina MiSeq	uncalculated	uncalculated	Antarctica: Taylor Valley	SAMN24469052	cDNA cryoconite2.1	SAMN24469052	-77.6194	162.995	Antarctic
f988	DRR141358	PRJDB7127	18531	874	SAMD00129961	2013-07-01	Illumina MiSeq	Greenland	North America	Greenland:Bowdoin Glacier	SAMD00129961	cDNA cryoconite2.2	SAMD00129961	77.6691	-68.5827	Arctic
PRJNA997912Sample70	SRR25396445	PRJNA997912	7369	811	SAMN36692225	2020	Illumina MiSeq	uncalculated	uncalculated	Antarctica: Livingstone Island	SAMN36692225	cDNA cryoconite3.2	SAMN36692225	-62.6897	-60.4178	Antarctic
PRJDB8807Sample78	DRR192251	PRJDB8807	5545	395	SAMD00186045	2017-08-25	Illumina MiSeq	China	Asia	China:Urumqi Glacier No. 1	SAMD00186045	cDNA cryoconite4.3	SAMD00186045	43.1	86.8	Tibetan Plateau
PRJDB7285Sample29	DRR147516	PRJDB7285	20623	1068	SAMD00134300	2016-07-01	Illumina MiSeq	Svalbard	Europe	Svalbard:Austre Broggerbreen\, NyAlesund	SAMD00134300	cDNA cryoconite5.1	SAMD00134300	78.9016	11.8193	Other alpine regions
f447	SRR13180847	PRJNA681925	44451	1569	SAMN16974611	2015/2016	Illumina MiSeq	Ecuador	South America	Ecuador	SAMN16974611	cryconite	SAMN16974611	0.0148	-78.0076	Other alpine regions
f445	SRR13180845	PRJNA681925	61800	313	SAMN16974613	2015/2016	Illumina MiSeq	Ecuador	South America	Ecuador	SAMN16974613	cryconite	SAMN16974613	0.0165	-78.0049	Other alpine regions
PRJDB8807Sample55	DRR192252	PRJDB8807	7986	409	SAMD00186046	2017-08-25	Illumina MiSeq	China	Asia	China:Urumqi Glacier No. 1	SAMD00186046	cryoconite	SAMD00186046	43.1	86.8	Tibetan Plateau
PRJDB8807Sample12	DRR192253	PRJDB8807	6456	418	SAMD00186047	2017-08-25	Illumina MiSeq	China	Asia	China:Urumqi Glacier No. 1	SAMD00186047	cryoconite	SAMD00186047	43.1	86.8	Tibetan Plateau
PRJDB8807Sample9	DRR192262	PRJDB8807	7298	420	SAMD00186056	2017-08-25	Illumina MiSeq	China	Asia	China:Urumqi Glacier No. 1	SAMD00186056	cryoconite	SAMD00186056	43.1	86.8	Tibetan Plateau
PRJDB8807Sample54	DRR192286	PRJDB8807	10015	320	SAMD00186080	2017-08-25	Illumina MiSeq	China	Asia	China:Urumqi Glacier No. 1	SAMD00186080	cryoconite	SAMD00186080	43.1	86.8	Tibetan Plateau
PRJDB8807Sample44	DRR192236	PRJDB8807	15724	624	SAMD00186030	2014-08-31	Illumina MiSeq	China	Asia	China:Urumqi Glacier No. 1	SAMD00186030	cryoconite	SAMD00186030	43.1	86.8	Tibetan Plateau
PRJDB8807Sample56	DRR192237	PRJDB8807	35894	935	SAMD00186031	2014-08-31	Illumina MiSeq	China	Asia	China:Urumqi Glacier No. 1	SAMD00186031	cryoconite	SAMD00186031	43.1	86.8	Tibetan Plateau
PRJDB8807Sample15	DRR192238	PRJDB8807	42496	837	SAMD00186032	2014-08-31	Illumina MiSeq	China	Asia	China:Urumqi Glacier No. 1	SAMD00186032	cryoconite	SAMD00186032	43.1	86.8	Tibetan Plateau
PRJDB8807Sample66	DRR192239	PRJDB8807	25322	765	SAMD00186033	2014-08-31	Illumina MiSeq	China	Asia	China:Urumqi Glacier No. 1	SAMD00186033	cryoconite	SAMD00186033	43.1	86.8	Tibetan Plateau
PRJDB8807Sample46	DRR192240	PRJDB8807	54450	924	SAMD00186034	2014-08-31	Illumina MiSeq	China	Asia	China:Urumqi Glacier No. 1	SAMD00186034	cryoconite	SAMD00186034	43.1	86.8	Tibetan Plateau
PRJDB8807Sample19	DRR192241	PRJDB8807	41076	863	SAMD00186035	2014-08-31	Illumina MiSeq	China	Asia	China:Urumqi Glacier No. 1	SAMD00186035	cryoconite	SAMD00186035	43.1	86.8	Tibetan Plateau
PRJDB8807Sample41	DRR192242	PRJDB8807	41381	1119	SAMD00186036	2014-08-31	Illumina MiSeq	China	Asia	China:Urumqi Glacier No. 1	SAMD00186036	cryoconite	SAMD00186036	43.1	86.8	Tibetan Plateau
PRJDB8807Sample5	DRR192243	PRJDB8807	37121	752	SAMD00186037	2014-08-31	Illumina MiSeq	China	Asia	China:Urumqi Glacier No. 1	SAMD00186037	cryoconite	SAMD00186037	43.1	86.8	Tibetan Plateau
PRJDB8807Sample67	DRR192244	PRJDB8807	43268	790	SAMD00186038	2014-08-31	Illumina MiSeq	China	Asia	China:Urumqi Glacier No. 1	SAMD00186038	cryoconite	SAMD00186038	43.1	86.8	Tibetan Plateau
PRJDB8807Sample42	DRR192245	PRJDB8807	38977	823	SAMD00186039	2014-08-31	Illumina MiSeq	China	Asia	China:Urumqi Glacier No. 1	SAMD00186039	cryoconite	SAMD00186039	43.1	86.8	Tibetan Plateau
PRJDB8807Sample13	DRR192246	PRJDB8807	68102	829	SAMD00186040	2014-08-31	Illumina MiSeq	China	Asia	China:Urumqi Glacier No. 1	SAMD00186040	cryoconite	SAMD00186040	43.1	86.8	Tibetan Plateau
PRJDB8807Sample11	DRR192247	PRJDB8807	49251	760	SAMD00186041	2014-08-31	Illumina MiSeq	China	Asia	China:Urumqi Glacier No. 1	SAMD00186041	cryoconite	SAMD00186041	43.1	86.8	Tibetan Plateau
PRJDB8807Sample79	DRR192248	PRJDB8807	58075	762	SAMD00186042	2014-08-31	Illumina MiSeq	China	Asia	China:Urumqi Glacier No. 1	SAMD00186042	cryoconite	SAMD00186042	43.1	86.8	Tibetan Plateau
PRJDB8807Sample16	DRR192249	PRJDB8807	24178	700	SAMD00186043	2014-08-31	Illumina MiSeq	China	Asia	China:Urumqi Glacier No. 1	SAMD00186043	cryoconite	SAMD00186043	43.1	86.8	Tibetan Plateau
PRJDB8807Sample2	DRR192255	PRJDB8807	30386	801	SAMD00186049	2017-08-25	Illumina MiSeq	China	Asia	China:Urumqi Glacier No. 1	SAMD00186049	cryoconite	SAMD00186049	43.1	86.8	Tibetan Plateau
PRJDB8807Sample25	DRR192256	PRJDB8807	21882	696	SAMD00186050	2017-08-25	Illumina MiSeq	China	Asia	China:Urumqi Glacier No. 1	SAMD00186050	cryoconite	SAMD00186050	43.1	86.8	Tibetan Plateau
PRJDB8807Sample36	DRR192257	PRJDB8807	28178	646	SAMD00186051	2017-08-25	Illumina MiSeq	China	Asia	China:Urumqi Glacier No. 1	SAMD00186051	cryoconite	SAMD00186051	43.1	86.8	Tibetan Plateau
PRJDB8807Sample34	DRR192258	PRJDB8807	38332	816	SAMD00186052	2017-08-25	Illumina MiSeq	China	Asia	China:Urumqi Glacier No. 1	SAMD00186052	cryoconite	SAMD00186052	43.1	86.8	Tibetan Plateau
PRJDB8807Sample49	DRR192259	PRJDB8807	27303	784	SAMD00186053	2017-08-25	Illumina MiSeq	China	Asia	China:Urumqi Glacier No. 1	SAMD00186053	cryoconite	SAMD00186053	43.1	86.8	Tibetan Plateau
PRJDB8807Sample47	DRR192264	PRJDB8807	26353	740	SAMD00186058	2017-08-25	Illumina MiSeq	China	Asia	China:Urumqi Glacier No. 1	SAMD00186058	cryoconite	SAMD00186058	43.1	86.8	Tibetan Plateau
PRJDB8807Sample61	DRR192265	PRJDB8807	30081	813	SAMD00186059	2017-08-25	Illumina MiSeq	China	Asia	China:Urumqi Glacier No. 1	SAMD00186059	cryoconite	SAMD00186059	43.1	86.8	Tibetan Plateau
PRJDB8807Sample76	DRR192266	PRJDB8807	17232	655	SAMD00186060	2017-08-25	Illumina MiSeq	China	Asia	China:Urumqi Glacier No. 1	SAMD00186060	cryoconite	SAMD00186060	43.1	86.8	Tibetan Plateau
PRJDB8807Sample59	DRR192267	PRJDB8807	46187	871	SAMD00186061	2017-08-25	Illumina MiSeq	China	Asia	China:Urumqi Glacier No. 1	SAMD00186061	cryoconite	SAMD00186061	43.1	86.8	Tibetan Plateau
PRJDB8807Sample48	DRR192268	PRJDB8807	24436	714	SAMD00186062	2017-08-25	Illumina MiSeq	China	Asia	China:Urumqi Glacier No. 1	SAMD00186062	cryoconite	SAMD00186062	43.1	86.8	Tibetan Plateau
PRJDB8807Sample38	DRR192269	PRJDB8807	51451	893	SAMD00186063	2017-08-25	Illumina MiSeq	China	Asia	China:Urumqi Glacier No. 1	SAMD00186063	cryoconite	SAMD00186063	43.1	86.8	Tibetan Plateau
PRJDB8807Sample45	DRR192275	PRJDB8807	28672	621	SAMD00186069	2017-08-25	Illumina MiSeq	China	Asia	China:Urumqi Glacier No. 1	SAMD00186069	cryoconite	SAMD00186069	43.1	86.8	Tibetan Plateau
PRJDB8807Sample24	DRR192277	PRJDB8807	53080	678	SAMD00186071	2017-08-25	Illumina MiSeq	China	Asia	China:Urumqi Glacier No. 1	SAMD00186071	cryoconite	SAMD00186071	43.1	86.8	Tibetan Plateau
PRJDB8807Sample72	DRR192278	PRJDB8807	29732	579	SAMD00186072	2017-08-25	Illumina MiSeq	China	Asia	China:Urumqi Glacier No. 1	SAMD00186072	cryoconite	SAMD00186072	43.1	86.8	Tibetan Plateau
PRJDB8807Sample14	DRR192279	PRJDB8807	29031	677	SAMD00186073	2017-08-25	Illumina MiSeq	China	Asia	China:Urumqi Glacier No. 1	SAMD00186073	cryoconite	SAMD00186073	43.1	86.8	Tibetan Plateau
PRJDB8807Sample50	DRR192280	PRJDB8807	16190	418	SAMD00186074	2017-08-25	Illumina MiSeq	China	Asia	China:Urumqi Glacier No. 1	SAMD00186074	cryoconite	SAMD00186074	43.1	86.8	Tibetan Plateau
PRJDB8807Sample28	DRR192281	PRJDB8807	30892	515	SAMD00186075	2017-08-25	Illumina MiSeq	China	Asia	China:Urumqi Glacier No. 1	SAMD00186075	cryoconite	SAMD00186075	43.1	86.8	Tibetan Plateau
PRJDB8807Sample64	DRR192282	PRJDB8807	12870	350	SAMD00186076	2017-08-25	Illumina MiSeq	China	Asia	China:Urumqi Glacier No. 1	SAMD00186076	cryoconite	SAMD00186076	43.1	86.8	Tibetan Plateau
PRJDB8807Sample22	DRR192284	PRJDB8807	22653	613	SAMD00186078	2017-08-25	Illumina MiSeq	China	Asia	China:Urumqi Glacier No. 1	SAMD00186078	cryoconite	SAMD00186078	43.1	86.8	Tibetan Plateau
PRJDB8807Sample39	DRR192285	PRJDB8807	16221	452	SAMD00186079	2017-08-25	Illumina MiSeq	China	Asia	China:Urumqi Glacier No. 1	SAMD00186079	cryoconite	SAMD00186079	43.1	86.8	Tibetan Plateau
PRJDB8807Sample70	DRR192287	PRJDB8807	44028	462	SAMD00186081	2017-08-25	Illumina MiSeq	China	Asia	China:Urumqi Glacier No. 1	SAMD00186081	cryoconite	SAMD00186081	43.1	86.8	Tibetan Plateau
PRJDB8807Sample32	DRR192288	PRJDB8807	20510	389	SAMD00186082	2017-08-25	Illumina MiSeq	China	Asia	China:Urumqi Glacier No. 1	SAMD00186082	cryoconite	SAMD00186082	43.1	86.8	Tibetan Plateau
PRJDB8807Sample27	DRR192289	PRJDB8807	37527	616	SAMD00186083	2017-08-25	Illumina MiSeq	China	Asia	China:Urumqi Glacier No. 1	SAMD00186083	cryoconite	SAMD00186083	43.1	86.8	Tibetan Plateau
PRJDB8807Sample18	DRR192290	PRJDB8807	86273	635	SAMD00186084	2017-08-25	Illumina MiSeq	China	Asia	China:Urumqi Glacier No. 1	SAMD00186084	cryoconite	SAMD00186084	43.1	86.8	Tibetan Plateau
PRJDB8807Sample17	DRR192291	PRJDB8807	55724	493	SAMD00186085	2017-08-25	Illumina MiSeq	China	Asia	China:Urumqi Glacier No. 1	SAMD00186085	cryoconite	SAMD00186085	43.1	86.8	Tibetan Plateau
PRJDB8807Sample7	DRR192292	PRJDB8807	41328	639	SAMD00186086	2017-08-25	Illumina MiSeq	China	Asia	China:Urumqi Glacier No. 1	SAMD00186086	cryoconite	SAMD00186086	43.1	86.8	Tibetan Plateau
PRJDB8807Sample6	DRR192293	PRJDB8807	35458	370	SAMD00186087	2017-08-25	Illumina MiSeq	China	Asia	China:Urumqi Glacier No. 1	SAMD00186087	cryoconite	SAMD00186087	43.1	86.8	Tibetan Plateau
PRJDB8807Sample31	DRR192294	PRJDB8807	131188	788	SAMD00186088	2017-08-25	Illumina MiSeq	China	Asia	China:Urumqi Glacier No. 1	SAMD00186088	cryoconite	SAMD00186088	43.1	86.8	Tibetan Plateau
PRJDB8807Sample73	DRR192295	PRJDB8807	80823	594	SAMD00186089	2017-08-25	Illumina MiSeq	China	Asia	China:Urumqi Glacier No. 1	SAMD00186089	cryoconite	SAMD00186089	43.1	86.8	Tibetan Plateau
PRJDB8807Sample52	DRR192296	PRJDB8807	120118	850	SAMD00186090	2017-08-25	Illumina MiSeq	China	Asia	China:Urumqi Glacier No. 1	SAMD00186090	cryoconite	SAMD00186090	43.1	86.8	Tibetan Plateau
PRJDB8807Sample21	DRR192297	PRJDB8807	40840	394	SAMD00186091	2017-08-25	Illumina MiSeq	China	Asia	China:Urumqi Glacier No. 1	SAMD00186091	cryoconite	SAMD00186091	43.1	86.8	Tibetan Plateau
PRJDB8807Sample74	DRR192299	PRJDB8807	26922	367	SAMD00186093	2017-08-25	Illumina MiSeq	China	Asia	China:Urumqi Glacier No. 1	SAMD00186093	cryoconite	SAMD00186093	43.1	86.8	Tibetan Plateau
PRJDB8807Sample62	DRR192300	PRJDB8807	15096	223	SAMD00186094	2017-08-25	Illumina MiSeq	China	Asia	China:Urumqi Glacier No. 1	SAMD00186094	cryoconite	SAMD00186094	43.1	86.8	Tibetan Plateau
PRJDB8807Sample1	DRR192301	PRJDB8807	25852	428	SAMD00186095	2017-08-25	Illumina MiSeq	China	Asia	China:Urumqi Glacier No. 1	SAMD00186095	cryoconite	SAMD00186095	43.1	86.8	Tibetan Plateau
PRJDB8807Sample81	DRR192303	PRJDB8807	20679	420	SAMD00186097	2017-08-25	Illumina MiSeq	China	Asia	China:Urumqi Glacier No. 1	SAMD00186097	cryoconite	SAMD00186097	43.1	86.8	Tibetan Plateau
PRJDB8807Sample69	DRR192304	PRJDB8807	34403	360	SAMD00186098	2017-08-25	Illumina MiSeq	China	Asia	China:Urumqi Glacier No. 1	SAMD00186098	cryoconite	SAMD00186098	43.1	86.8	Tibetan Plateau
PRJDB8807Sample3	DRR192305	PRJDB8807	28735	332	SAMD00186099	2017-08-25	Illumina MiSeq	China	Asia	China:Urumqi Glacier No. 1	SAMD00186099	cryoconite	SAMD00186099	43.1	86.8	Tibetan Plateau
PRJDB8807Sample43	DRR192306	PRJDB8807	46990	521	SAMD00186100	2017-08-25	Illumina MiSeq	China	Asia	China:Urumqi Glacier No. 1	SAMD00186100	cryoconite	SAMD00186100	43.1	86.8	Tibetan Plateau
PRJDB8807Sample63	DRR192307	PRJDB8807	16716	348	SAMD00186101	2017-08-25	Illumina MiSeq	China	Asia	China:Urumqi Glacier No. 1	SAMD00186101	cryoconite	SAMD00186101	43.1	86.8	Tibetan Plateau
PRJDB8807Sample33	DRR192308	PRJDB8807	25352	489	SAMD00186102	2017-08-25	Illumina MiSeq	China	Asia	China:Urumqi Glacier No. 1	SAMD00186102	cryoconite	SAMD00186102	43.1	86.8	Tibetan Plateau
PRJDB8807Sample68	DRR192309	PRJDB8807	152222	672	SAMD00186103	2017-08-25	Illumina MiSeq	China	Asia	China:Urumqi Glacier No. 1	SAMD00186103	cryoconite	SAMD00186103	43.1	86.8	Tibetan Plateau
PRJDB8807Sample23	DRR192310	PRJDB8807	156825	625	SAMD00186104	2017-08-25	Illumina MiSeq	China	Asia	China:Urumqi Glacier No. 1	SAMD00186104	cryoconite	SAMD00186104	43.1	86.8	Tibetan Plateau
PRJDB8807Sample77	DRR192311	PRJDB8807	94249	467	SAMD00186105	2017-08-25	Illumina MiSeq	China	Asia	China:Urumqi Glacier No. 1	SAMD00186105	cryoconite	SAMD00186105	43.1	86.8	Tibetan Plateau
PRJDB8807Sample40	DRR192312	PRJDB8807	60698	473	SAMD00186106	2017-08-25	Illumina MiSeq	China	Asia	China:Urumqi Glacier No. 1	SAMD00186106	cryoconite	SAMD00186106	43.1	86.8	Tibetan Plateau
PRJDB8807Sample80	DRR192313	PRJDB8807	103655	639	SAMD00186107	2017-08-25	Illumina MiSeq	China	Asia	China:Urumqi Glacier No. 1	SAMD00186107	cryoconite	SAMD00186107	43.1	86.8	Tibetan Plateau
PRJDB8807Sample65	DRR192314	PRJDB8807	199243	669	SAMD00186108	2017-08-25	Illumina MiSeq	China	Asia	China:Urumqi Glacier No. 1	SAMD00186108	cryoconite	SAMD00186108	43.1	86.8	Tibetan Plateau
PRJDB8807Sample53	DRR192315	PRJDB8807	196050	616	SAMD00186109	2017-08-25	Illumina MiSeq	China	Asia	China:Urumqi Glacier No. 1	SAMD00186109	cryoconite	SAMD00186109	43.1	86.8	Tibetan Plateau
PRJDB8807Sample57	DRR192316	PRJDB8807	92635	339	SAMD00186110	2017-08-25	Illumina MiSeq	China	Asia	China:Urumqi Glacier No. 1	SAMD00186110	cryoconite	SAMD00186110	43.1	86.8	Tibetan Plateau
PRJDB8807Sample83	DRR192317	PRJDB8807	140939	638	SAMD00186111	2017-08-25	Illumina MiSeq	China	Asia	China:Urumqi Glacier No. 1	SAMD00186111	cryoconite	SAMD00186111	43.1	86.8	Tibetan Plateau
PRJDB8807Sample20	DRR192318	PRJDB8807	13450	326	SAMD00186112	2017-08-25	Illumina MiSeq	China	Asia	China:Urumqi Glacier No. 1	SAMD00186112	cryoconite	SAMD00186112	43.1	86.8	Tibetan Plateau
PRJDB8807Sample60	DRR192276	PRJDB8807	9033	448	SAMD00186070	2017-08-25	Illumina MiSeq	China	Asia	China:Urumqi Glacier No. 1	SAMD00186070	cryoconite	SAMD00186070	43.1	86.8	Tibetan Plateau
PRJNA509012Sample19	SRR8293632	PRJNA509012	47828	457	SAMN10535397	missing	Illumina MiSeq	China	Asia	China: Tibetan Plateau	SAMN10535397	cryoconite	SAMN10535397	39.474	96.533	Tibetan Plateau
PRJNA509012Sample26	SRR8293633	PRJNA509012	32107	776	SAMN10535396	missing	Illumina MiSeq	China	Asia	China: Tibetan Plateau	SAMN10535396	cryoconite	SAMN10535396	39.474	96.534	Tibetan Plateau
PRJNA509012Sample5	SRR8293638	PRJNA509012	39087	852	SAMN10535395	missing	Illumina MiSeq	China	Asia	China: Tibetan Plateau	SAMN10535395	cryoconite	SAMN10535395	39.474	96.537	Tibetan Plateau
PRJNA509012Sample13	SRR8293639	PRJNA509012	30728	784	SAMN10535394	missing	Illumina MiSeq	China	Asia	China: Tibetan Plateau	SAMN10535394	cryoconite	SAMN10535394	39.474	96.536	Tibetan Plateau
PRJNA509012Sample21	SRR8293640	PRJNA509012	36849	894	SAMN10535393	missing	Illumina MiSeq	China	Asia	China: Tibetan Plateau	SAMN10535393	cryoconite	SAMN10535393	39.474	96.535	Tibetan Plateau
PRJNA509012Sample4	SRR8293634	PRJNA509012	33349	963	SAMN10535391	missing	Illumina MiSeq	China	Asia	China: Tibetan Plateau	SAMN10535391	cryoconite	SAMN10535391	39.475	96.534	Tibetan Plateau
PRJNA509012Sample12	SRR8293635	PRJNA509012	42269	980	SAMN10535390	missing	Illumina MiSeq	China	Asia	China: Tibetan Plateau	SAMN10535390	cryoconite	SAMN10535390	39.475	96.535	Tibetan Plateau
PRJNA509012Sample20	SRR8293636	PRJNA509012	28404	845	SAMN10535389	missing	Illumina MiSeq	China	Asia	China: Tibetan Plateau	SAMN10535389	cryoconite	SAMN10535389	39.475	96.536	Tibetan Plateau
PRJNA509012Sample27	SRR8293637	PRJNA509012	39016	901	SAMN10535388	missing	Illumina MiSeq	China	Asia	China: Tibetan Plateau	SAMN10535388	cryoconite	SAMN10535388	39.475	96.537	Tibetan Plateau
PRJNA509012Sample28	SRR8293641	PRJNA509012	32339	861	SAMN10535392	missing	Illumina MiSeq	China	Asia	China: Tibetan Plateau	SAMN10535392	cryoconite	SAMN10535392	39.475	96.533	Tibetan Plateau
PRJNA509012Sample9	SRR8293623	PRJNA509012	43888	853	SAMN10535371	missing	Illumina MiSeq	China	Asia	China: Tibetan Plateau	SAMN10535371	cryoconite	SAMN10535371	39.476	96.534	Tibetan Plateau
PRJNA509012Sample2	SRR8293626	PRJNA509012	29996	917	SAMN10535374	missing	Illumina MiSeq	China	Asia	China: Tibetan Plateau	SAMN10535374	cryoconite	SAMN10535374	39.476	96.535	Tibetan Plateau
PRJNA509012Sample10	SRR8293627	PRJNA509012	42044	807	SAMN10535375	missing	Illumina MiSeq	China	Asia	China: Tibetan Plateau	SAMN10535375	cryoconite	SAMN10535375	39.476	96.537	Tibetan Plateau
PRJNA509012Sample18	SRR8293628	PRJNA509012	44944	531	SAMN10535372	missing	Illumina MiSeq	China	Asia	China: Tibetan Plateau	SAMN10535372	cryoconite	SAMN10535372	39.476	96.533	Tibetan Plateau
PRJNA509012Sample25	SRR8293629	PRJNA509012	32184	740	SAMN10535373	missing	Illumina MiSeq	China	Asia	China: Tibetan Plateau	SAMN10535373	cryoconite	SAMN10535373	39.476	96.536	Tibetan Plateau
PRJNA509012Sample22	SRR8293644	PRJNA509012	39838	841	SAMN10535378	missing	Illumina MiSeq	China	Asia	China: Tibetan Plateau	SAMN10535378	cryoconite	SAMN10535378	39.476	96.538	Tibetan Plateau
PRJNA509012Sample29	SRR8293645	PRJNA509012	30922	757	SAMN10535379	missing	Illumina MiSeq	China	Asia	China: Tibetan Plateau	SAMN10535379	cryoconite	SAMN10535379	39.476	96.539	Tibetan Plateau
PRJNA509012Sample1	SRR8293622	PRJNA509012	31065	798	SAMN10535370	missing	Illumina MiSeq	China	Asia	China: Tibetan Plateau	SAMN10535370	cryoconite	SAMN10535370	39.477	96.533	Tibetan Plateau
PRJNA509012Sample17	SRR8293624	PRJNA509012	40515	698	SAMN10535368	missing	Illumina MiSeq	China	Asia	China: Tibetan Plateau	SAMN10535368	cryoconite	SAMN10535368	39.477	96.534	Tibetan Plateau
PRJNA509012Sample24	SRR8293625	PRJNA509012	43252	358	SAMN10535369	missing	Illumina MiSeq	China	Asia	China: Tibetan Plateau	SAMN10535369	cryoconite	SAMN10535369	39.477	96.535	Tibetan Plateau
PRJNA509012Sample3	SRR8293630	PRJNA509012	41436	748	SAMN10535376	missing	Illumina MiSeq	China	Asia	China: Tibetan Plateau	SAMN10535376	cryoconite	SAMN10535376	39.477	96.536	Tibetan Plateau
PRJNA509012Sample11	SRR8293631	PRJNA509012	48753	392	SAMN10535377	missing	Illumina MiSeq	China	Asia	China: Tibetan Plateau	SAMN10535377	cryoconite	SAMN10535377	39.477	96.537	Tibetan Plateau
PRJNA509012Sample6	SRR8293642	PRJNA509012	38063	930	SAMN10535380	missing	Illumina MiSeq	China	Asia	China: Tibetan Plateau	SAMN10535380	cryoconite	SAMN10535380	39.477	96.538	Tibetan Plateau
PRJNA509012Sample14	SRR8293643	PRJNA509012	42313	811	SAMN10535381	missing	Illumina MiSeq	China	Asia	China: Tibetan Plateau	SAMN10535381	cryoconite	SAMN10535381	39.477	96.539	Tibetan Plateau
PRJNA509012Sample7	SRR8293646	PRJNA509012	35159	793	SAMN10535384	missing	Illumina MiSeq	China	Asia	China: Tibetan Plateau	SAMN10535384	cryoconite	SAMN10535384	39.478	96.537	Tibetan Plateau
PRJNA509012Sample15	SRR8293647	PRJNA509012	37170	695	SAMN10535385	missing	Illumina MiSeq	China	Asia	China: Tibetan Plateau	SAMN10535385	cryoconite	SAMN10535385	39.478	96.535	Tibetan Plateau
PRJNA509012Sample23	SRR8293648	PRJNA509012	29671	702	SAMN10535382	missing	Illumina MiSeq	China	Asia	China: Tibetan Plateau	SAMN10535382	cryoconite	SAMN10535382	39.478	96.538	Tibetan Plateau
PRJNA509012Sample30	SRR8293649	PRJNA509012	37752	793	SAMN10535383	missing	Illumina MiSeq	China	Asia	China: Tibetan Plateau	SAMN10535383	cryoconite	SAMN10535383	39.478	96.536	Tibetan Plateau
PRJNA509012Sample8	SRR8293650	PRJNA509012	30955	751	SAMN10535386	missing	Illumina MiSeq	China	Asia	China: Tibetan Plateau	SAMN10535386	cryoconite	SAMN10535386	39.478	96.534	Tibetan Plateau
PRJNA509012Sample16	SRR8293651	PRJNA509012	32462	828	SAMN10535387	missing	Illumina MiSeq	China	Asia	China: Tibetan Plateau	SAMN10535387	cryoconite	SAMN10535387	39.478	96.533	Tibetan Plateau
f1037	DRR147141	PRJDB7127	17203	935	SAMD00132171	2013-07-01	Illumina MiSeq	Greenland	North America	Greenland:Scarlet Heart Glacier	SAMD00132171	cryoconite	SAMD00132171	77.6655	-69.4508	Arctic
f1115	DRR147219	PRJDB7127	26258	1093	SAMD00132249	2013-07-01	Illumina MiSeq	Greenland	North America	Greenland:Qaqortoq Glacier	SAMD00132249	Cryoconite	SAMD00132249	77.6683	-68.8197	Arctic
f1111	DRR147215	PRJDB7127	22998	1033	SAMD00132245	2013-07-01	Illumina MiSeq	Greenland	North America	Greenland:Verhoeff Glacier	SAMD00132245	cryoconite	SAMD00132245	77.8605	-69.8688	Arctic
f1012	DRR144684	PRJDB7127	18089	899	SAMD00132011	2013-07-01	Illumina MiSeq	Greenland	North America	Greenland:Meehan Glacier	SAMD00132011	cryoconite	SAMD00132011	77.8744	-70.3127	Arctic
PRJEB14999Sample26	ERR1553652	PRJEB14999	19393	1053	SAMEA4360821	2014	Illumina MiSeq	Greenland	Greenland	Greenland	PRJEB14999	Cryoconite	SAMEA4360821	67.0666	-49.3833	Arctic
PRJEB14999Sample99	ERR1553658	PRJEB14999	24215	900	SAMEA4360827	2014	Illumina MiSeq	Greenland	North America	Southwest Greenland ice sheet	SAMEA4360827	Cryoconite	SAMEA4360827	0	0	Arctic
PRJEB14999Sample5	ERR1553684	PRJEB14999	41937	1410	SAMEA4360853	2014	Illumina MiSeq	Greenland	North America	Southwest Greenland ice sheet	SAMEA4360853	Cryoconite	SAMEA4360853	0	0	Arctic
PRJEB14999Sample56	ERR1553695	PRJEB14999	30398	1157	SAMEA4360864	2014	Illumina MiSeq	Greenland	North America	Southwest Greenland ice sheet	SAMEA4360864	Cryoconite	SAMEA4360864	0	0	Arctic
PRJEB14999Sample85	ERR1553715	PRJEB14999	12760	1389	SAMEA4360884	2014	Illumina MiSeq	Greenland	North America	Southwest Greenland ice sheet	SAMEA4360884	Cryoconite	SAMEA4360884	67.0666	-49.3833	Arctic
PRJEB14999Sample67	ERR1553766	PRJEB14999	12944	1448	SAMEA4360935	2014	Illumina MiSeq	Greenland	North America	Southwest Greenland ice sheet	SAMEA4360935	Cryoconite	SAMEA4360935	67.0666	-49.3833	Arctic
PRJEB14999Sample73	ERR1553739	PRJEB14999	12435	1352	SAMEA4360908	2014	Illumina MiSeq	Greenland	North America	Southwest Greenland ice sheet	SAMEA4360908	Cryoconite	SAMEA4360908	67.0666	-49.3833	Arctic
PRJEB14999Sample10	ERR1553760	PRJEB14999	14829	1561	SAMEA4360929	2014	Illumina MiSeq	Greenland	North America	Southwest Greenland ice sheet	SAMEA4360929	Cryoconite	SAMEA4360929	67.0666	-49.3833	Arctic
PRJEB14999Sample1	ERR1553745	PRJEB14999	13717	1468	SAMEA4360914	2014	Illumina MiSeq	Greenland	North America	Southwest Greenland ice sheet	SAMEA4360914	Cryoconite	SAMEA4360914	67.0666	-49.3833	Arctic
PRJEB14999Sample77	ERR1553757	PRJEB14999	6475	868	SAMEA4360926	2014	Illumina MiSeq	Greenland	North America	Southwest Greenland ice sheet	SAMEA4360926	Cryoconite	SAMEA4360926	67.0666	-49.3833	Arctic
PRJEB14999Sample64	ERR1553736	PRJEB14999	11933	1448	SAMEA4360905	2014	Illumina MiSeq	Greenland	North America	Southwest Greenland ice sheet	SAMEA4360905	Cryoconite	SAMEA4360905	67.0666	-49.3833	Arctic
PRJEB14999Sample101	ERR1553728	PRJEB14999	10977	1306	SAMEA4360897	2014	Illumina MiSeq	Greenland	North America	Southwest Greenland ice sheet	SAMEA4360897	Cryoconite	SAMEA4360897	67.0666	-49.3833	Arctic
PRJEB14999Sample8	ERR1553764	PRJEB14999	9377	1150	SAMEA4360933	2014	Illumina MiSeq	Greenland	North America	Southwest Greenland ice sheet	SAMEA4360933	Cryoconite	SAMEA4360933	67.0666	-49.3833	Arctic
PRJEB14999Sample119	ERR1553751	PRJEB14999	10736	1284	SAMEA4360920	2014	Illumina MiSeq	Greenland	North America	Southwest Greenland ice sheet	SAMEA4360920	Cryoconite	SAMEA4360920	67.0666	-49.3833	Arctic
PRJEB14999Sample66	ERR1553712	PRJEB14999	11882	1344	SAMEA4360881	2014	Illumina MiSeq	Greenland	North America	Southwest Greenland ice sheet	SAMEA4360881	Cryoconite	SAMEA4360881	67.0666	-49.3833	Arctic
PRJEB14999Sample25	ERR1553761	PRJEB14999	10288	1234	SAMEA4360930	2014	Illumina MiSeq	Greenland	North America	Southwest Greenland ice sheet	SAMEA4360930	Cryoconite	SAMEA4360930	67.0666	-49.3833	Arctic
PRJEB14999Sample53	ERR1553714	PRJEB14999	11729	1415	SAMEA4360883	2014	Illumina MiSeq	Greenland	North America	Southwest Greenland ice sheet	SAMEA4360883	Cryoconite	SAMEA4360883	67.0666	-49.3833	Arctic
PRJEB14999Sample76	ERR1553740	PRJEB14999	9656	1123	SAMEA4360909	2014	Illumina MiSeq	Greenland	North America	Southwest Greenland ice sheet	SAMEA4360909	Cryoconite	SAMEA4360909	67.0666	-49.3833	Arctic
PRJEB14999Sample71	ERR1553725	PRJEB14999	10500	1311	SAMEA4360894	2014	Illumina MiSeq	Greenland	North America	Southwest Greenland ice sheet	SAMEA4360894	Cryoconite	SAMEA4360894	67.0666	-49.3833	Arctic
PRJEB14999Sample16	ERR1553724	PRJEB14999	11082	1371	SAMEA4360893	2014	Illumina MiSeq	Greenland	North America	Southwest Greenland ice sheet	SAMEA4360893	Cryoconite	SAMEA4360893	67.0666	-49.3833	Arctic
PRJEB14999Sample82	ERR1553713	PRJEB14999	10828	1252	SAMEA4360882	2014	Illumina MiSeq	Greenland	North America	Southwest Greenland ice sheet	SAMEA4360882	Cryoconite	SAMEA4360882	67.0666	-49.3833	Arctic
PRJEB14999Sample88	ERR1553767	PRJEB14999	12109	1436	SAMEA4360936	2014	Illumina MiSeq	Greenland	North America	Southwest Greenland ice sheet	SAMEA4360936	Cryoconite	SAMEA4360936	67.0666	-49.3833	Arctic
PRJEB14999Sample110	ERR1553769	PRJEB14999	11390	1319	SAMEA4360938	2014	Illumina MiSeq	Greenland	North America	Southwest Greenland ice sheet	SAMEA4360938	Cryoconite	SAMEA4360938	67.0666	-49.3833	Arctic
PRJEB14999Sample9	ERR1553770	PRJEB14999	11610	1300	SAMEA4360939	2014	Illumina MiSeq	Greenland	North America	Southwest Greenland ice sheet	SAMEA4360939	Cryoconite	SAMEA4360939	67.0666	-49.3833	Arctic
PRJEB14999Sample4	ERR1553732	PRJEB14999	11341	1370	SAMEA4360901	2014	Illumina MiSeq	Greenland	North America	Southwest Greenland ice sheet	SAMEA4360901	Cryoconite	SAMEA4360901	67.0666	-49.3833	Arctic
PRJEB14999Sample44	ERR1553726	PRJEB14999	11201	1372	SAMEA4360895	2014	Illumina MiSeq	Greenland	North America	Southwest Greenland ice sheet	SAMEA4360895	Cryoconite	SAMEA4360895	67.0666	-49.3833	Arctic
PRJEB14999Sample15	ERR1553716	PRJEB14999	11280	1391	SAMEA4360885	2014	Illumina MiSeq	Greenland	North America	Southwest Greenland ice sheet	SAMEA4360885	Cryoconite	SAMEA4360885	67.0666	-49.3833	Arctic
PRJEB14999Sample55	ERR1553730	PRJEB14999	10836	1299	SAMEA4360899	2014	Illumina MiSeq	Greenland	North America	Southwest Greenland ice sheet	SAMEA4360899	Cryoconite	SAMEA4360899	67.0666	-49.3833	Arctic
PRJEB14999Sample68	ERR1553734	PRJEB14999	12458	1439	SAMEA4360903	2014	Illumina MiSeq	Greenland	North America	Southwest Greenland ice sheet	SAMEA4360903	Cryoconite	SAMEA4360903	67.0666	-49.3833	Arctic
PRJEB14999Sample19	ERR1553720	PRJEB14999	11781	1374	SAMEA4360889	2014	Illumina MiSeq	Greenland	North America	Southwest Greenland ice sheet	SAMEA4360889	Cryoconite	SAMEA4360889	67.0666	-49.3833	Arctic
PRJEB14999Sample34	ERR1553733	PRJEB14999	12458	1473	SAMEA4360902	2014	Illumina MiSeq	Greenland	North America	Southwest Greenland ice sheet	SAMEA4360902	Cryoconite	SAMEA4360902	67.0666	-49.3833	Arctic
PRJEB14999Sample21	ERR1553737	PRJEB14999	11921	1329	SAMEA4360906	2014	Illumina MiSeq	Greenland	North America	Southwest Greenland ice sheet	SAMEA4360906	Cryoconite	SAMEA4360906	67.0666	-49.3833	Arctic
PRJEB14999Sample83	ERR1553727	PRJEB14999	12596	1467	SAMEA4360896	2014	Illumina MiSeq	Greenland	North America	Southwest Greenland ice sheet	SAMEA4360896	Cryoconite	SAMEA4360896	67.0666	-49.3833	Arctic
PRJEB14999Sample23	ERR1553741	PRJEB14999	14708	1533	SAMEA4360910	2014	Illumina MiSeq	Greenland	North America	Southwest Greenland ice sheet	SAMEA4360910	cryoconite	SAMEA4360910	67.0666	-49.3833	Arctic
PRJEB14999Sample40	ERR1553717	PRJEB14999	14113	1496	SAMEA4360886	2014	Illumina MiSeq	Greenland	North America	Southwest Greenland ice sheet	SAMEA4360886	cryoconite	SAMEA4360886	67.0666	-49.3833	Arctic
PRJEB14999Sample80	ERR1553746	PRJEB14999	13332	1283	SAMEA4360915	2014	Illumina MiSeq	Greenland	North America	Southwest Greenland ice sheet	SAMEA4360915	cryoconite	SAMEA4360915	67.0666	-49.3833	Arctic
PRJEB14999Sample17	ERR1553731	PRJEB14999	12886	1266	SAMEA4360900	2014	Illumina MiSeq	Greenland	North America	Southwest Greenland ice sheet	SAMEA4360900	cryoconite	SAMEA4360900	67.0666	-49.3833	Arctic
PRJEB14999Sample79	ERR1553754	PRJEB14999	13775	1361	SAMEA4360923	2014	Illumina MiSeq	Greenland	North America	Southwest Greenland ice sheet	SAMEA4360923	cryoconite	SAMEA4360923	67.0666	-49.3833	Arctic
PRJEB14999Sample41	ERR1553744	PRJEB14999	14974	1524	SAMEA4360913	2014	Illumina MiSeq	Greenland	North America	Southwest Greenland ice sheet	SAMEA4360913	cryoconite	SAMEA4360913	67.0666	-49.3833	Arctic
PRJEB14999Sample104	ERR1553711	PRJEB14999	13557	1359	SAMEA4360880	2014	Illumina MiSeq	Greenland	North America	Southwest Greenland ice sheet	SAMEA4360880	cryoconite	SAMEA4360880	67.0666	-49.3833	Arctic
PRJEB14999Sample69	ERR1553763	PRJEB14999	14441	1380	SAMEA4360932	2014	Illumina MiSeq	Greenland	North America	Southwest Greenland ice sheet	SAMEA4360932	cryoconite	SAMEA4360932	67.0666	-49.3833	Arctic
PRJEB14999Sample37	ERR1553765	PRJEB14999	14386	1374	SAMEA4360934	2014	Illumina MiSeq	Greenland	North America	Southwest Greenland ice sheet	SAMEA4360934	cryoconite	SAMEA4360934	67.0666	-49.3833	Arctic
PRJEB14999Sample28	ERR1553758	PRJEB14999	15583	1522	SAMEA4360927	2014	Illumina MiSeq	Greenland	North America	Southwest Greenland ice sheet	SAMEA4360927	cryoconite	SAMEA4360927	67.0666	-49.3833	Arctic
PRJEB14999Sample62	ERR1553768	PRJEB14999	16240	1643	SAMEA4360937	2014	Illumina MiSeq	Greenland	North America	Southwest Greenland ice sheet	SAMEA4360937	cryoconite	SAMEA4360937	67.0666	-49.3833	Arctic
PRJEB14999Sample29	ERR1553721	PRJEB14999	15576	1521	SAMEA4360890	2014	Illumina MiSeq	Greenland	North America	Southwest Greenland ice sheet	SAMEA4360890	cryoconite	SAMEA4360890	67.0666	-49.3833	Arctic
PRJEB14999Sample22	ERR1553750	PRJEB14999	15901	1541	SAMEA4360919	2014	Illumina MiSeq	Greenland	North America	Southwest Greenland ice sheet	SAMEA4360919	cryoconite	SAMEA4360919	67.0666	-49.3833	Arctic
PRJEB14999Sample6	ERR1553752	PRJEB14999	15880	1407	SAMEA4360921	2014	Illumina MiSeq	Greenland	North America	Southwest Greenland ice sheet	SAMEA4360921	cryoconite	SAMEA4360921	67.0666	-49.3833	Arctic
PRJEB14999Sample63	ERR1553722	PRJEB14999	14375	1282	SAMEA4360891	2014	Illumina MiSeq	Greenland	North America	Southwest Greenland ice sheet	SAMEA4360891	cryoconite	SAMEA4360891	67.0666	-49.3833	Arctic
PRJEB14999Sample94	ERR1553748	PRJEB14999	14557	1323	SAMEA4360917	2014	Illumina MiSeq	Greenland	North America	Southwest Greenland ice sheet	SAMEA4360917	cryoconite	SAMEA4360917	67.0666	-49.3833	Arctic
PRJEB14999Sample114	ERR1553747	PRJEB14999	15236	1351	SAMEA4360916	2014	Illumina MiSeq	Greenland	North America	Southwest Greenland ice sheet	SAMEA4360916	cryoconite	SAMEA4360916	67.0666	-49.3833	Arctic
PRJEB14999Sample91	ERR1553762	PRJEB14999	18781	1707	SAMEA4360931	2014	Illumina MiSeq	Greenland	North America	Southwest Greenland ice sheet	SAMEA4360931	cryoconite	SAMEA4360931	67.0666	-49.3833	Arctic
PRJEB14999Sample31	ERR1553676	PRJEB14999	13751	986	SAMEA4360845	2014	Illumina MiSeq	Greenland	North America	Southwest Greenland ice sheet	SAMEA4360845	cryoconite	SAMEA4360845	67.0666	-49.3833	Arctic
PRJEB14999Sample60	ERR1553753	PRJEB14999	16447	1377	SAMEA4360922	2014	Illumina MiSeq	Greenland	North America	Southwest Greenland ice sheet	SAMEA4360922	cryoconite	SAMEA4360922	67.0666	-49.3833	Arctic
PRJEB14999Sample61	ERR1553735	PRJEB14999	18889	1670	SAMEA4360904	2014	Illumina MiSeq	Greenland	North America	Southwest Greenland ice sheet	SAMEA4360904	cryoconite	SAMEA4360904	67.0666	-49.3833	Arctic
PRJEB14999Sample18	ERR1553706	PRJEB14999	12689	889	SAMEA4360875	2014	Illumina MiSeq	Greenland	North America	Southwest Greenland ice sheet	SAMEA4360875	cryoconite	SAMEA4360875	67.0666	-49.3833	Arctic
PRJEB14999Sample43	ERR1553759	PRJEB14999	18125	1391	SAMEA4360928	2014	Illumina MiSeq	Greenland	North America	Southwest Greenland ice sheet	SAMEA4360928	cryoconite	SAMEA4360928	67.0666	-49.3833	Arctic
PRJEB14999Sample112	ERR1553673	PRJEB14999	15297	1130	SAMEA4360842	2014	Illumina MiSeq	Greenland	North America	Southwest Greenland ice sheet	SAMEA4360842	cryoconite	SAMEA4360842	67.0666	-49.3833	Arctic
PRJEB14999Sample58	ERR1553680	PRJEB14999	15297	1120	SAMEA4360849	2014	Illumina MiSeq	Greenland	North America	Southwest Greenland ice sheet	SAMEA4360849	cryoconite	SAMEA4360849	67.0666	-49.3833	Arctic
PRJEB14999Sample95	ERR1553662	PRJEB14999	12846	935	SAMEA4360831	2014	Illumina MiSeq	Greenland	North America	Southwest Greenland ice sheet	SAMEA4360831	cryoconite	SAMEA4360831	67.0666	-49.3833	Arctic
PRJEB14999Sample116	ERR1553756	PRJEB14999	15865	1279	SAMEA4360925	2014	Illumina MiSeq	Greenland	North America	Southwest Greenland ice sheet	SAMEA4360925	cryoconite	SAMEA4360925	67.0666	-49.3833	Arctic
PRJEB14999Sample54	ERR1553677	PRJEB14999	14769	1040	SAMEA4360846	2014	Illumina MiSeq	Greenland	North America	Southwest Greenland ice sheet	SAMEA4360846	cryoconite	SAMEA4360846	67.0666	-49.3833	Arctic
PRJEB14999Sample57	ERR1553699	PRJEB14999	16277	1130	SAMEA4360868	2014	Illumina MiSeq	Greenland	North America	Southwest Greenland ice sheet	SAMEA4360868	cryoconite	SAMEA4360868	67.0666	-49.3833	Arctic
PRJEB14999Sample38	ERR1553705	PRJEB14999	17648	1162	SAMEA4360874	2014	Illumina MiSeq	Greenland	North America	Southwest Greenland ice sheet	SAMEA4360874	cryoconite	SAMEA4360874	67.0666	-49.3833	Arctic
PRJEB14999Sample90	ERR1553697	PRJEB14999	17413	1173	SAMEA4360866	2014	Illumina MiSeq	Greenland	North America	Southwest Greenland ice sheet	SAMEA4360866	cryoconite	SAMEA4360866	67.0666	-49.3833	Arctic
PRJEB14999Sample11	ERR1553707	PRJEB14999	12853	935	SAMEA4360876	2014	Illumina MiSeq	Greenland	North America	Southwest Greenland ice sheet	SAMEA4360876	cryoconite	SAMEA4360876	67.0666	-49.3833	Arctic
PRJEB14999Sample107	ERR1553663	PRJEB14999	15093	985	SAMEA4360832	2014	Illumina MiSeq	Greenland	North America	Southwest Greenland ice sheet	SAMEA4360832	cryoconite	SAMEA4360832	67.0666	-49.3833	Arctic
PRJEB14999Sample65	ERR1553702	PRJEB14999	17138	1088	SAMEA4360871	2014	Illumina MiSeq	Greenland	North America	Southwest Greenland ice sheet	SAMEA4360871	cryoconite	SAMEA4360871	67.0666	-49.3833	Arctic
PRJEB14999Sample42	ERR1553678	PRJEB14999	16499	1045	SAMEA4360847	2014	Illumina MiSeq	Greenland	North America	Southwest Greenland ice sheet	SAMEA4360847	cryoconite	SAMEA4360847	67.0666	-49.3833	Arctic
PRJEB14999Sample30	ERR1553653	PRJEB14999	15158	991	SAMEA4360822	2014	Illumina MiSeq	Greenland	North America	Southwest Greenland ice sheet	SAMEA4360822	cryoconite	SAMEA4360822	67.0666	-49.3833	Arctic
PRJEB14999Sample98	ERR1553771	PRJEB14999	22794	1659	SAMEA4360940	2014	Illumina MiSeq	Greenland	North America	Southwest Greenland ice sheet	SAMEA4360940	cryoconite	SAMEA4360940	67.0666	-49.3833	Arctic
PRJEB14999Sample33	ERR1553666	PRJEB14999	17284	1064	SAMEA4360835	2014	Illumina MiSeq	Greenland	North America	Southwest Greenland ice sheet	SAMEA4360835	cryoconite	SAMEA4360835	67.0666	-49.3833	Arctic
PRJEB14999Sample115	ERR1553655	PRJEB14999	17900	1154	SAMEA4360824	2014	Illumina MiSeq	Greenland	North America	Southwest Greenland ice sheet	SAMEA4360824	cryoconite	SAMEA4360824	67.0666	-49.3833	Arctic
PRJEB14999Sample14	ERR1553685	PRJEB14999	18823	1206	SAMEA4360854	2014	Illumina MiSeq	Greenland	North America	Southwest Greenland ice sheet	SAMEA4360854	cryoconite	SAMEA4360854	67.0666	-49.3833	Arctic
PRJEB14999Sample3	ERR1553682	PRJEB14999	19668	1196	SAMEA4360851	2014	Illumina MiSeq	Greenland	North America	Southwest Greenland ice sheet	SAMEA4360851	cryoconite	SAMEA4360851	67.0666	-49.3833	Arctic
PRJEB14999Sample46	ERR1553689	PRJEB14999	16968	1121	SAMEA4360858	2014	Illumina MiSeq	Greenland	North America	Southwest Greenland ice sheet	SAMEA4360858	cryoconite	SAMEA4360858	67.0666	-49.3833	Arctic
PRJEB14999Sample12	ERR1553667	PRJEB14999	19542	1231	SAMEA4360836	2014	Illumina MiSeq	Greenland	North America	Southwest Greenland ice sheet	SAMEA4360836	cryoconite	SAMEA4360836	67.0666	-49.3833	Arctic
PRJEB14999Sample96	ERR1553671	PRJEB14999	19412	1175	SAMEA4360840	2014	Illumina MiSeq	Greenland	North America	Southwest Greenland ice sheet	SAMEA4360840	cryoconite	SAMEA4360840	67.0666	-49.3833	Arctic
PRJEB14999Sample93	ERR1553692	PRJEB14999	17420	1064	SAMEA4360861	2014	Illumina MiSeq	Greenland	North America	Southwest Greenland ice sheet	SAMEA4360861	cryoconite	SAMEA4360861	67.0666	-49.3833	Arctic
PRJEB14999Sample111	ERR1553668	PRJEB14999	17639	1079	SAMEA4360837	2014	Illumina MiSeq	Greenland	North America	Southwest Greenland ice sheet	SAMEA4360837	cryoconite	SAMEA4360837	67.0666	-49.3833	Arctic
PRJEB14999Sample72	ERR1553700	PRJEB14999	17957	1063	SAMEA4360869	2014	Illumina MiSeq	Greenland	North America	Southwest Greenland ice sheet	SAMEA4360869	cryoconite	SAMEA4360869	67.0666	-49.3833	Arctic
PRJEB14999Sample84	ERR1553709	PRJEB14999	21079	1228	SAMEA4360878	2014	Illumina MiSeq	Greenland	North America	Southwest Greenland ice sheet	SAMEA4360878	cryoconite	SAMEA4360878	67.0666	-49.3833	Arctic
PRJEB14999Sample117	ERR1553694	PRJEB14999	18932	1145	SAMEA4360863	2014	Illumina MiSeq	Greenland	North America	Southwest Greenland ice sheet	SAMEA4360863	cryoconite	SAMEA4360863	67.0666	-49.3833	Arctic
PRJEB14999Sample59	ERR1553665	PRJEB14999	21112	1182	SAMEA4360834	2014	Illumina MiSeq	Greenland	North America	Southwest Greenland ice sheet	SAMEA4360834	cryoconite	SAMEA4360834	67.0666	-49.3833	Arctic
PRJEB14999Sample102	ERR1553701	PRJEB14999	18744	1109	SAMEA4360870	2014	Illumina MiSeq	Greenland	North America	Southwest Greenland ice sheet	SAMEA4360870	cryoconite	SAMEA4360870	67.0666	-49.3833	Arctic
PRJEB14999Sample105	ERR1553669	PRJEB14999	19667	1135	SAMEA4360838	2014	Illumina MiSeq	Greenland	North America	Southwest Greenland ice sheet	SAMEA4360838	cryoconite	SAMEA4360838	67.0666	-49.3833	Arctic
PRJEB14999Sample121	ERR1553661	PRJEB14999	19307	1164	SAMEA4360830	2014	Illumina MiSeq	Greenland	North America	Southwest Greenland ice sheet	SAMEA4360830	cryoconite	SAMEA4360830	67.0666	-49.3833	Arctic
PRJEB14999Sample39	ERR1553687	PRJEB14999	15729	828	SAMEA4360856	2014	Illumina MiSeq	Greenland	North America	Southwest Greenland ice sheet	SAMEA4360856	cryoconite	SAMEA4360856	67.0666	-49.3833	Arctic
PRJEB14999Sample120	ERR1553664	PRJEB14999	21964	1231	SAMEA4360833	2014	Illumina MiSeq	Greenland	North America	Southwest Greenland ice sheet	SAMEA4360833	cryoconite	SAMEA4360833	67.0666	-49.3833	Arctic
PRJEB14999Sample70	ERR1553681	PRJEB14999	25216	1323	SAMEA4360850	2014	Illumina MiSeq	Greenland	North America	Southwest Greenland ice sheet	SAMEA4360850	cryoconite	SAMEA4360850	67.0666	-49.3833	Arctic
PRJEB14999Sample108	ERR1553703	PRJEB14999	22970	1126	SAMEA4360872	2014	Illumina MiSeq	Greenland	North America	Southwest Greenland ice sheet	SAMEA4360872	cryoconite	SAMEA4360872	67.0666	-49.3833	Arctic
PRJEB14999Sample32	ERR1553698	PRJEB14999	19311	907	SAMEA4360867	2014	Illumina MiSeq	Greenland	North America	Southwest Greenland ice sheet	SAMEA4360867	cryoconite	SAMEA4360867	67.0666	-49.3833	Arctic
PRJEB14999Sample89	ERR1553656	PRJEB14999	20438	890	SAMEA4360825	2014	Illumina MiSeq	Greenland	North America	Southwest Greenland ice sheet	SAMEA4360825	cryoconite	SAMEA4360825	67.0666	-49.3833	Arctic
PRJNA318626Sample6	SRR3397077	PRJNA318626	8474	433	SAMN04851376	2014-07-10	Illumina MiSeq	Greenland	North America	Greenland: S6	SAMN04851376	cryoconite	SAMN04851376	67.0457	-49.2383	Arctic
PRJNA318626Sample2	SRR3396584	PRJNA318626	11884	460	SAMN04851328	2014-07-17	Illumina MiSeq	Greenland	North America	Greenland: S6	SAMN04851328	cryoconite	SAMN04851328	67.0457	-49.2383	Arctic
PRJNA318626Sample55	SRR3396540	PRJNA318626	37460	823	SAMN04851322	2014-07-03	Illumina MiSeq	Greenland	North America	Greenland: S6	SAMN04851322	cryoconite	SAMN04851322	67.0457	-49.2383	Arctic
PRJNA318626Sample73	SRR3396559	PRJNA318626	19976	528	SAMN04851324	2014-07-03	Illumina MiSeq	Greenland	North America	Greenland: S6	SAMN04851324	cryoconite	SAMN04851324	67.0457	-49.2383	Arctic
PRJNA318626Sample82	SRR3396560	PRJNA318626	12672	333	SAMN04851325	2014-07-10	Illumina MiSeq	Greenland	North America	Greenland: S6	SAMN04851325	cryoconite	SAMN04851325	67.0457	-49.2383	Arctic
PRJNA318626Sample20	SRR3396622	PRJNA318626	9796	337	SAMN04851330	2014-07-17	Illumina MiSeq	Greenland	North America	Greenland: S6	SAMN04851330	cryoconite	SAMN04851330	67.0457	-49.2383	Arctic
PRJNA318626Sample29	SRR3396627	PRJNA318626	23961	549	SAMN04851331	2014-07-24	Illumina MiSeq	Greenland	North America	Greenland: S6	SAMN04851331	cryoconite	SAMN04851331	67.0457	-49.2383	Arctic
PRJNA318626Sample38	SRR3396628	PRJNA318626	8549	284	SAMN04851332	2014-07-24	Illumina MiSeq	Greenland	North America	Greenland: S6	SAMN04851332	cryoconite	SAMN04851332	67.0457	-49.2383	Arctic
PRJNA318626Sample47	SRR3396629	PRJNA318626	112670	1071	SAMN04851333	2014-07-24	Illumina MiSeq	Greenland	North America	Greenland: S6	SAMN04851333	cryoconite	SAMN04851333	67.0457	-49.2383	Arctic
PRJNA318626Sample56	SRR3396630	PRJNA318626	9142	103	SAMN04851334	2014-06-19	Illumina MiSeq	Greenland	North America	Greenland: S6	SAMN04851334	cryoconite	SAMN04851334	67.0457	-49.2385	Arctic
PRJNA318626Sample68	SRR3397070	PRJNA318626	12494	409	SAMN04851371	2014-07-03	Illumina MiSeq	Greenland	North America	Greenland: S6	SAMN04851371	cryoconite	SAMN04851371	67.0457	-49.2383	Arctic
PRJNA318626Sample77	SRR3397071	PRJNA318626	10182	256	SAMN04851372	2014-07-03	Illumina MiSeq	Greenland	North America	Greenland: S6	SAMN04851372	cryoconite	SAMN04851372	67.0457	-49.2383	Arctic
PRJNA318626Sample86	SRR3397072	PRJNA318626	25576	204	SAMN04851373	2014-07-03	Illumina MiSeq	Greenland	North America	Greenland: S6	SAMN04851373	cryoconite	SAMN04851373	67.0457	-49.2383	Arctic
PRJNA318626Sample95	SRR3397073	PRJNA318626	5450	59	SAMN04851374	2014-07-10	Illumina MiSeq	Greenland	North America	Greenland: S6	SAMN04851374	cryoconite	SAMN04851374	67.0457	-49.2383	Arctic
PRJNA318626Sample104	SRR3397075	PRJNA318626	17387	371	SAMN04851375	2014-07-10	Illumina MiSeq	Greenland	North America	Greenland: S6	SAMN04851375	cryoconite	SAMN04851375	67.0457	-49.2383	Arctic
PRJNA318626Sample24	SRR3397079	PRJNA318626	11846	374	SAMN04851378	2014-07-17	Illumina MiSeq	Greenland	North America	Greenland: S6	SAMN04851378	cryoconite	SAMN04851378	67.0457	-49.2383	Arctic
PRJNA318626Sample33	SRR3397080	PRJNA318626	14370	157	SAMN04851379	2014-07-24	Illumina MiSeq	Greenland	North America	Greenland: S6	SAMN04851379	cryoconite	SAMN04851379	67.0457	-49.2383	Arctic
PRJNA318626Sample42	SRR3397081	PRJNA318626	21779	649	SAMN04851380	2014-07-24	Illumina MiSeq	Greenland	North America	Greenland: S6	SAMN04851380	cryoconite	SAMN04851380	67.0457	-49.2383	Arctic
PRJNA318626Sample51	SRR3397082	PRJNA318626	17695	286	SAMN04851381	2014-07-24	Illumina MiSeq	Greenland	North America	Greenland: S6	SAMN04851381	cryoconite	SAMN04851381	67.0457	-49.2383	Arctic
PRJNA318626Sample60	SRR3397083	PRJNA318626	22317	470	SAMN04851382	2014-07-31	Illumina MiSeq	Greenland	North America	Greenland: S6	SAMN04851382	cryoconite	SAMN04851382	67.0457	-49.2383	Arctic
PRJNA318626Sample69	SRR3397084	PRJNA318626	6638	110	SAMN04851383	2014-07-31	Illumina MiSeq	Greenland	North America	Greenland: S6	SAMN04851383	cryoconite	SAMN04851383	67.0457	-49.2383	Arctic
PRJNA318626Sample78	SRR3397085	PRJNA318626	24454	826	SAMN04851384	2014-07-31	Illumina MiSeq	Greenland	North America	Greenland: S6	SAMN04851384	cryoconite	SAMN04851384	67.0457	-49.2383	Arctic
PRJNA318626Sample87	SRR3397086	PRJNA318626	8071	70	SAMN04851385	2014-06-19	Illumina MiSeq	Greenland	North America	Greenland: S6	SAMN04851385	cryoconite	SAMN04851385	67.0457	-49.2385	Arctic
PRJNA318626Sample23	SRR3397062	PRJNA318626	19616	638	SAMN04851366	2014-06-19	Illumina MiSeq	Greenland	North America	Greenland: S6	SAMN04851366	cryoconite	SAMN04851366	67.0472	-49.23	Arctic
PRJNA318626Sample32	SRR3397063	PRJNA318626	17977	181	SAMN04851367	2014-06-19	Illumina MiSeq	Greenland	North America	Greenland: S6	SAMN04851367	cryoconite	SAMN04851367	67.0472	-49.23	Arctic
PRJNA318626Sample41	SRR3397065	PRJNA318626	7537	201	SAMN04851368	2014-06-26	Illumina MiSeq	Greenland	North America	Greenland: S6	SAMN04851368	cryoconite	SAMN04851368	67.0472	-49.23	Arctic
PRJNA318626Sample50	SRR3397068	PRJNA318626	19890	528	SAMN04851369	2014-06-26	Illumina MiSeq	Greenland	North America	Greenland: S6	SAMN04851369	cryoconite	SAMN04851369	67.0472	-49.23	Arctic
PRJNA318626Sample59	SRR3397069	PRJNA318626	16772	304	SAMN04851370	2014-06-26	Illumina MiSeq	Greenland	North America	Greenland: S6	SAMN04851370	cryoconite	SAMN04851370	67.0472	-49.23	Arctic
f757	SRR24392323	PRJNA942590	14796	610	SAMN34511180	2021-07-16	Illumina MiSeq	Greenland	North America	Greenland	SAMN34511180	cryoconite	SAMN34511180	61.1014	-46.8481	Arctic
f753	SRR24392314	PRJNA942590	20673	695	SAMN34511180	2021-07-16	Illumina MiSeq	Greenland	North America	Greenland	SAMN34511180	cryoconite	SAMN34511180	61.1014	-46.8481	Arctic
f758	SRR24392324	PRJNA942590	18867	678	SAMN34511180	2021-07-16	Illumina MiSeq	Greenland	North America	Greenland	SAMN34511180	cryoconite	SAMN34511180	61.1014	-46.8481	Arctic
f216	ERR834130	PRJEB8981	24553	451	SAMEA3316313	2013-08-28	Illumina MiSeq	Italy	Europe		SAMEA3316313	Cryoconite	SAMEA3316313	-10.5859	-46.3977	Other alpine regions
f226	ERR834140	PRJEB8981	31842	426	SAMEA3316304	2013-08-28	Illumina MiSeq	Italy	Europe		SAMEA3316304	Cryoconite	SAMEA3316304	-10.5859	-46.3979	Other alpine regions
f204	ERR834118	PRJEB8981	67833	518	SAMEA3316322	2013-07-10	Illumina MiSeq	Italy	Europe		SAMEA3316322	Cryoconite	SAMEA3316322	-10.5859	-46.3981	Other alpine regions
f205	ERR834119	PRJEB8981	57291	438	SAMEA3316323	2013-07-10	Illumina MiSeq	Italy	Europe		SAMEA3316323	Cryoconite	SAMEA3316323	-10.5859	-46.3981	Other alpine regions
f210	ERR834124	PRJEB8981	15155	327	SAMEA3316328	2013-07-10	Illumina MiSeq	Italy	Europe		SAMEA3316328	Cryoconite	SAMEA3316328	-10.5859	-46.398	Other alpine regions
f211	ERR834125	PRJEB8981	31124	406	SAMEA3316329	2013-07-10	Illumina MiSeq	Italy	Europe		SAMEA3316329	Cryoconite	SAMEA3316329	-10.5859	-46.3981	Other alpine regions
f206	ERR834120	PRJEB8981	46939	447	SAMEA3316324	2013-07-10	Illumina MiSeq	Italy	Europe		SAMEA3316324	Cryoconite	SAMEA3316324	-10.5859	-46.3982	Other alpine regions
f212	ERR834126	PRJEB8981	33656	395	SAMEA3316330	2013-07-10	Illumina MiSeq	Italy	Europe		SAMEA3316330	Cryoconite	SAMEA3316330	-10.5859	-46.3979	Other alpine regions
f213	ERR834127	PRJEB8981	91675	522	SAMEA3316332	2013-07-10	Illumina MiSeq	Italy	Europe		SAMEA3316332	Cryoconite	SAMEA3316332	-10.5859	-46.3979	Other alpine regions
f230	ERR834144	PRJEB8981	49129	427	SAMEA3316308	2013-08-28	Illumina MiSeq	Italy	Europe		SAMEA3316308	Cryoconite	SAMEA3316308	-10.5859	-46.3978	Other alpine regions
f209	ERR834123	PRJEB8981	56103	465	SAMEA3316327	2013-07-10	Illumina MiSeq	Italy	Europe		SAMEA3316327	Cryoconite	SAMEA3316327	-10.5858	-46.398	Other alpine regions
f228	ERR834142	PRJEB8981	23994	367	SAMEA3316306	2013-08-28	Illumina MiSeq	Italy	Europe		SAMEA3316306	Cryoconite	SAMEA3316306	-10.5858	-46.3978	Other alpine regions
f232	ERR834146	PRJEB8981	37843	439	SAMEA3316310	2013-08-28	Illumina MiSeq	Italy	Europe		SAMEA3316310	Cryoconite	SAMEA3316310	-10.5858	-46.3976	Other alpine regions
f218	ERR834132	PRJEB8981	11790	280	SAMEA3316315	2013-08-28	Illumina MiSeq	Italy	Europe		SAMEA3316315	Cryoconite	SAMEA3316315	-10.5858	-46.3976	Other alpine regions
f229	ERR834143	PRJEB8981	66570	461	SAMEA3316307	2013-08-28	Illumina MiSeq	Italy	Europe		SAMEA3316307	Cryoconite	SAMEA3316307	-10.5858	-46.3976	Other alpine regions
f233	ERR834147	PRJEB8981	18384	363	SAMEA3316312	2013-08-28	Illumina MiSeq	Italy	Europe		SAMEA3316312	Cryoconite	SAMEA3316312	-10.5858	-46.3976	Other alpine regions
f241	ERR834155	PRJEB8981	24965	440	SAMEA3316358	2013-09-25	Illumina MiSeq	Italy	Europe		SAMEA3316358	Cryoconite	SAMEA3316358	-10.5858	-46.3978	Other alpine regions
f253	ERR834167	PRJEB8981	25657	405	SAMEA3316352	2013-09-25	Illumina MiSeq	Italy	Europe		SAMEA3316352	Cryoconite	SAMEA3316352	-10.5858	-46.3978	Other alpine regions
f202	ERR834116	PRJEB8981	38695	401	SAMEA3316339	2013-07-10	Illumina MiSeq	Italy	Europe		SAMEA3316339	Cryoconite	SAMEA3316339	-10.5857	-46.3982	Other alpine regions
f200	ERR834114	PRJEB8981	86297	460	SAMEA3316337	2013-07-10	Illumina MiSeq	Italy	Europe		SAMEA3316337	Cryoconite	SAMEA3316337	-10.5857	-46.3982	Other alpine regions
f203	ERR834117	PRJEB8981	39011	404	SAMEA3316321	2013-07-10	Illumina MiSeq	Italy	Europe		SAMEA3316321	Cryoconite	SAMEA3316321	-10.5857	-46.3981	Other alpine regions
f197	ERR834111	PRJEB8981	55867	424	SAMEA3316334	2013-07-10	Illumina MiSeq	Italy	Europe		SAMEA3316334	Cryoconite	SAMEA3316334	-10.5856	-46.3982	Other alpine regions
f198	ERR834112	PRJEB8981	57587	439	SAMEA3316335	2013-07-10	Illumina MiSeq	Italy	Europe		SAMEA3316335	Cryoconite	SAMEA3316335	-10.5856	-46.3982	Other alpine regions
f208	ERR834122	PRJEB8981	80333	508	SAMEA3316326	2013-07-10	Illumina MiSeq	Italy	Europe		SAMEA3316326	Cryoconite	SAMEA3316326	-10.5856	-46.3981	Other alpine regions
f194	ERR834108	PRJEB8981	56687	407	SAMEA3316320	2013-07-16	Illumina MiSeq	Italy	Europe		SAMEA3316320	Cryoconite	SAMEA3316320	-10.5856	-46.3982	Other alpine regions
f201	ERR834115	PRJEB8981	66930	449	SAMEA3316338	2013-07-10	Illumina MiSeq	Italy	Europe		SAMEA3316338	Cryoconite	SAMEA3316338	-10.5856	-46.3982	Other alpine regions
f207	ERR834121	PRJEB8981	36543	377	SAMEA3316325	2013-07-10	Illumina MiSeq	Italy	Europe		SAMEA3316325	Cryoconite	SAMEA3316325	-10.5856	-46.3981	Other alpine regions
f222	ERR834136	PRJEB8981	5831	199	SAMEA3316319	2013-08-28	Illumina MiSeq	Italy	Europe		SAMEA3316319	Cryoconite	SAMEA3316319	-10.5856	-46.3982	Other alpine regions
f225	ERR834139	PRJEB8981	180041	624	SAMEA3316303	2013-08-28	Illumina MiSeq	Italy	Europe		SAMEA3316303	Cryoconite	SAMEA3316303	-10.5856	-46.3983	Other alpine regions
f238	ERR834152	PRJEB8981	13757	337	SAMEA3316355	2013-09-25	Illumina MiSeq	Italy	Europe		SAMEA3316355	Cryoconite	SAMEA3316355	-10.5856	-46.3982	Other alpine regions
f195	ERR834109	PRJEB8981	53039	452	SAMEA3316331	2013-07-10	Illumina MiSeq	Italy	Europe		SAMEA3316331	Cryoconite	SAMEA3316331	-10.5856	-46.3982	Other alpine regions
f196	ERR834110	PRJEB8981	42266	425	SAMEA3316333	2013-07-10	Illumina MiSeq	Italy	Europe		SAMEA3316333	Cryoconite	SAMEA3316333	-10.5856	-46.3982	Other alpine regions
f214	ERR834128	PRJEB8981	23159	347	SAMEA3318066	2013-08-28	Illumina MiSeq	Italy	Europe		SAMEA3318066	Cryoconite	SAMEA3318066	-10.5856	-46.3982	Other alpine regions
f224	ERR834138	PRJEB8981	55413	454	SAMEA3316302	2013-08-28	Illumina MiSeq	Italy	Europe		SAMEA3316302	Cryoconite	SAMEA3316302	-10.5856	-46.3983	Other alpine regions
f242	ERR834156	PRJEB8981	73626	544	SAMEA3316359	2013-09-25	Illumina MiSeq	Italy	Europe		SAMEA3316359	Cryoconite	SAMEA3316359	-10.5856	-46.3982	Other alpine regions
f244	ERR834158	PRJEB8981	11573	274	SAMEA3316342	2013-09-25	Illumina MiSeq	Italy	Europe		SAMEA3316342	Cryoconite	SAMEA3316342	-10.5856	-46.3982	Other alpine regions
f245	ERR834159	PRJEB8981	24828	351	SAMEA3316343	2013-09-25	Illumina MiSeq	Italy	Europe		SAMEA3316343	Cryoconite	SAMEA3316343	-10.5856	-46.3981	Other alpine regions
f217	ERR834131	PRJEB8981	28164	366	SAMEA3316314	2013-08-28	Illumina MiSeq	Italy	Europe		SAMEA3316314	Cryoconite	SAMEA3316314	-10.5855	-46.3982	Other alpine regions
f223	ERR834137	PRJEB8981	131158	609	SAMEA3316301	2013-08-28	Illumina MiSeq	Italy	Europe		SAMEA3316301	Cryoconite	SAMEA3316301	-10.5855	-46.3982	Other alpine regions
f219	ERR834133	PRJEB8981	15911	332	SAMEA3316316	2013-08-28	Illumina MiSeq	Italy	Europe		SAMEA3316316	Cryoconite	SAMEA3316316	-10.5855	-46.3982	Other alpine regions
f199	ERR834113	PRJEB8981	67274	473	SAMEA3316336	2013-07-10	Illumina MiSeq	Italy	Europe		SAMEA3316336	Cryoconite	SAMEA3316336	-10.5855	-46.3982	Other alpine regions
f240	ERR834154	PRJEB8981	62583	510	SAMEA3316357	2013-09-25	Illumina MiSeq	Italy	Europe		SAMEA3316357	Cryoconite	SAMEA3316357	-10.5854	-46.3983	Other alpine regions
f243	ERR834157	PRJEB8981	9114	299	SAMEA3316341	2013-09-25	Illumina MiSeq	Italy	Europe		SAMEA3316341	Cryoconite	SAMEA3316341	-10.5854	-46.3983	Other alpine regions
f248	ERR834162	PRJEB8981	9518	277	SAMEA3316346	2013-09-25	Illumina MiSeq	Italy	Europe		SAMEA3316346	Cryoconite	SAMEA3316346	-10.5854	-46.3983	Other alpine regions
f250	ERR834164	PRJEB8981	8965	304	SAMEA3316348	2013-09-25	Illumina MiSeq	Italy	Europe		SAMEA3316348	Cryoconite	SAMEA3316348	-10.5853	-46.3978	Other alpine regions
f251	ERR834165	PRJEB8981	9158	299	SAMEA3316349	2013-09-25	Illumina MiSeq	Italy	Europe		SAMEA3316349	Cryoconite	SAMEA3316349	-10.5853	-46.3978	Other alpine regions
f236	ERR834150	PRJEB8981	6557	306	SAMEA3316353	2013-09-25	Illumina MiSeq	Italy	Europe	Lombardia\, Valfurva	SAMEA3316353	Cryoconite	SAMEA3316353	10.5858	46.3977	Other alpine regions
f82	ERR2508442	PRJEB8981	99093	626	SAMEA1099218	2016-08-16	Illumina MiSeq	Italy	Europe	Italy	SAMEA1099218	cryoconite	SAMEA1099218	46.3895	10.5901	Other alpine regions
f44	ERR2508423	PRJEB8981	42318	546	SAMEA1099197	2016-08-02	Illumina MiSeq	Italy	Europe	Italy	SAMEA1099197	cryoconite	SAMEA1099197	46.395	10.589	Other alpine regions
f45	ERR2508424	PRJEB8981	37425	508	SAMEA1099198	2016-08-02	Illumina MiSeq	Italy	Europe	Italy	SAMEA1099198	cryoconite	SAMEA1099198	46.395	10.589	Other alpine regions
f46	ERR2508425	PRJEB8981	43074	501	SAMEA1099199	2016-08-02	Illumina MiSeq	Italy	Europe	Italy	SAMEA1099199	cryoconite	SAMEA1099199	46.395	10.589	Other alpine regions
f47	ERR2508426	PRJEB8981	65756	541	SAMEA1099200	2016-08-02	Illumina MiSeq	Italy	Europe	Italy	SAMEA1099200	cryoconite	SAMEA1099200	46.395	10.589	Other alpine regions
f48	ERR2508427	PRJEB8981	51789	532	SAMEA1099201	2016-08-02	Illumina MiSeq	Italy	Europe	Italy	SAMEA1099201	cryoconite	SAMEA1099201	46.395	10.589	Other alpine regions
f49	ERR2508428	PRJEB8981	67510	547	SAMEA1099202	2016-08-02	Illumina MiSeq	Italy	Europe	Italy	SAMEA1099202	cryoconite	SAMEA1099202	46.395	10.589	Other alpine regions
f50	ERR2508429	PRJEB8981	61633	515	SAMEA1099204	2016-08-02	Illumina MiSeq	Italy	Europe	Italy	SAMEA1099204	cryoconite	SAMEA1099204	46.395	10.589	Other alpine regions
f51	ERR2508430	PRJEB8981	97897	620	SAMEA1099205	2016-08-02	Illumina MiSeq	Italy	Europe	Italy	SAMEA1099205	cryoconite	SAMEA1099205	46.395	10.589	Other alpine regions
f52	ERR2508431	PRJEB8981	75495	596	SAMEA1099206	2016-08-02	Illumina MiSeq	Italy	Europe	Italy	SAMEA1099206	cryoconite	SAMEA1099206	46.395	10.589	Other alpine regions
f90	ERR2508440	PRJEB8981	124252	685	SAMEA1099216	2016-08-16	Illumina MiSeq	Italy	Europe	Italy	SAMEA1099216	cryoconite	SAMEA1099216	46.395	10.5898	Other alpine regions
f91	ERR2508441	PRJEB8981	122221	666	SAMEA1099217	2016-08-16	Illumina MiSeq	Italy	Europe	Italy	SAMEA1099217	cryoconite	SAMEA1099217	46.3951	10.59	Other alpine regions
f89	ERR2508439	PRJEB8981	89271	611	SAMEA1099215	2016-08-16	Illumina MiSeq	Italy	Europe	Italy	SAMEA1099215	cryoconite	SAMEA1099215	46.3951	10.5899	Other alpine regions
f100	ERR2508450	PRJEB8981	63428	576	SAMEA1099227	2016-09-02	Illumina MiSeq	Italy	Europe	Italy	SAMEA1099227	cryoconite	SAMEA1099227	46.3951	10.59	Other alpine regions
f99	ERR2508449	PRJEB8981	99851	652	SAMEA1099226	2016-09-02	Illumina MiSeq	Italy	Europe	Italy	SAMEA1099226	cryoconite	SAMEA1099226	46.3951	10.5898	Other alpine regions
f92	ERR2508452	PRJEB8981	80384	625	SAMEA1099229	2016-09-02	Illumina MiSeq	Italy	Europe	Italy	SAMEA1099229	cryoconite	SAMEA1099229	46.3952	10.5902	Other alpine regions
f101	ERR2508451	PRJEB8981	76526	598	SAMEA1099228	2016-09-02	Illumina MiSeq	Italy	Europe	Italy	SAMEA1099228	cryoconite	SAMEA1099228	46.3952	10.5901	Other alpine regions
f83	ERR2508433	PRJEB8981	85864	613	SAMEA1099208	2016-08-16	Illumina MiSeq	Italy	Europe	Italy	SAMEA1099208	cryoconite	SAMEA1099208	46.3952	10.5899	Other alpine regions
f88	ERR2508438	PRJEB8981	153619	669	SAMEA1099214	2016-08-16	Illumina MiSeq	Italy	Europe	Italy	SAMEA1099214	cryoconite	SAMEA1099214	46.3952	10.5897	Other alpine regions
f84	ERR2508434	PRJEB8981	171256	668	SAMEA1099209	2016-08-16	Illumina MiSeq	Italy	Europe	Italy	SAMEA1099209	cryoconite	SAMEA1099209	46.3952	10.5899	Other alpine regions
f81	ERR2508421	PRJEB8981	150485	688	SAMEA1099195	2016-07-19	Illumina MiSeq	Italy	Europe	Italy	SAMEA1099195	cryoconite	SAMEA1099195	46.3953	10.5899	Other alpine regions
f94	ERR2508444	PRJEB8981	116688	657	SAMEA1099220	2016-09-02	Illumina MiSeq	Italy	Europe	Italy	SAMEA1099220	cryoconite	SAMEA1099220	46.3953	10.5899	Other alpine regions
f98	ERR2508448	PRJEB8981	83315	631	SAMEA1099225	2016-09-02	Illumina MiSeq	Italy	Europe	Italy	SAMEA1099225	cryoconite	SAMEA1099225	46.3953	10.5898	Other alpine regions
f66	ERR2508396	PRJEB8981	98321	615	SAMEA1099166	2016-07-05	Illumina MiSeq	Italy	Europe	Italy	SAMEA1099166	cryoconite	SAMEA1099166	46.3953	10.5899	Other alpine regions
f79	ERR2508419	PRJEB8981	90465	654	SAMEA1099193	2016-07-19	Illumina MiSeq	Italy	Europe	Italy	SAMEA1099193	cryoconite	SAMEA1099193	46.3953	10.5894	Other alpine regions
f78	ERR2508418	PRJEB8981	98601	607	SAMEA1099191	2016-07-19	Illumina MiSeq	Italy	Europe	Italy	SAMEA1099191	cryoconite	SAMEA1099191	46.3953	10.5899	Other alpine regions
f25	ERR2508384	PRJEB8981	79199	628	SAMEA1099152	2015-07-01	Illumina MiSeq	Italy	Europe	Italy	SAMEA1099152	cryoconite	SAMEA1099152	46.3983	10.5855	Other alpine regions
f26	ERR2508385	PRJEB8981	101151	667	SAMEA1099153	2015-07-01	Illumina MiSeq	Italy	Europe	Italy	SAMEA1099153	cryoconite	SAMEA1099153	46.3983	10.5855	Other alpine regions
f32	ERR2508372	PRJEB8981	67830	618	SAMEA1099138	2015-07-01	Illumina MiSeq	Italy	Europe	Italy	SAMEA1099138	cryoconite	SAMEA1099138	46.3994	10.585	Other alpine regions
f35	ERR2508373	PRJEB8981	452882	885	SAMEA1099139	2015-07-01	Illumina MiSeq	Italy	Europe	Italy	SAMEA1099139	cryoconite	SAMEA1099139	46.3994	10.585	Other alpine regions
f36	ERR2508374	PRJEB8981	63662	611	SAMEA1099140	2015-07-01	Illumina MiSeq	Italy	Europe	Italy	SAMEA1099140	cryoconite	SAMEA1099140	46.3994	10.585	Other alpine regions
f37	ERR2508375	PRJEB8981	54381	566	SAMEA1099141	2015-07-01	Illumina MiSeq	Italy	Europe	Italy	SAMEA1099141	cryoconite	SAMEA1099141	46.3994	10.585	Other alpine regions
f87	ERR2508437	PRJEB8981	129361	638	SAMEA1099213	2016-08-16	Illumina MiSeq	Italy	Europe	Italy	SAMEA1099213	cryoconite	SAMEA1099213	46.3952	10.5897	Other alpine regions
f65	ERR2508395	PRJEB8981	105489	601	SAMEA1099165	2016-07-05	Illumina MiSeq	Italy	Europe	Italy	SAMEA1099165	cryoconite	SAMEA1099165	46.3952	10.5899	Other alpine regions
f93	ERR2508443	PRJEB8981	123924	647	SAMEA1099219	2016-09-02	Illumina MiSeq	Italy	Europe	Italy	SAMEA1099219	cryoconite	SAMEA1099219	46.3952	10.59	Other alpine regions
f95	ERR2508445	PRJEB8981	79672	608	SAMEA1099221	2016-09-02	Illumina MiSeq	Italy	Europe	Italy	SAMEA1099221	cryoconite	SAMEA1099221	46.3952	10.5899	Other alpine regions
f74	ERR2508414	PRJEB8981	87124	628	SAMEA1099187	2016-07-19	Illumina MiSeq	Italy	Europe	Italy	SAMEA1099187	cryoconite	SAMEA1099187	46.3952	10.3901	Other alpine regions
f73	ERR2508413	PRJEB8981	119826	654	SAMEA1099186	2016-07-19	Illumina MiSeq	Italy	Europe	Italy	SAMEA1099186	cryoconite	SAMEA1099186	46.3953	10.5901	Other alpine regions
f75	ERR2508415	PRJEB8981	158405	668	SAMEA1099188	2016-07-19	Illumina MiSeq	Italy	Europe	Italy	SAMEA1099188	cryoconite	SAMEA1099188	46.3953	10.5901	Other alpine regions
f64	ERR2508394	PRJEB8981	101947	642	SAMEA1099164	2016-07-05	Illumina MiSeq	Italy	Europe	Italy	SAMEA1099164	cryoconite	SAMEA1099164	46.3953	10.5899	Other alpine regions
f72	ERR2508422	PRJEB8981	136171	651	SAMEA1099196	2016-07-19	Illumina MiSeq	Italy	Europe	Italy	SAMEA1099196	cryoconite	SAMEA1099196	46.3953	10.5898	Other alpine regions
f86	ERR2508436	PRJEB8981	62496	588	SAMEA1099211	2016-08-16	Illumina MiSeq	Italy	Europe	Italy	SAMEA1099211	cryoconite	SAMEA1099211	46.3953	10.5898	Other alpine regions
f77	ERR2508417	PRJEB8981	137028	582	SAMEA1099190	2016-07-19	Illumina MiSeq	Italy	Europe	Italy	SAMEA1099190	cryoconite	SAMEA1099190	46.3953	10.5899	Other alpine regions
f69	ERR2508399	PRJEB8981	93365	619	SAMEA1099170	2016-07-05	Illumina MiSeq	Italy	Europe	Italy	SAMEA1099170	cryoconite	SAMEA1099170	46.3953	10.5898	Other alpine regions
f76	ERR2508416	PRJEB8981	101639	585	SAMEA1099189	2016-07-19	Illumina MiSeq	Italy	Europe	Italy	SAMEA1099189	cryoconite	SAMEA1099189	46.3953	10.5899	Other alpine regions
f80	ERR2508420	PRJEB8981	69537	576	SAMEA1099194	2016-07-19	Illumina MiSeq	Italy	Europe	Italy	SAMEA1099194	cryoconite	SAMEA1099194	46.3953	10.5899	Other alpine regions
f67	ERR2508397	PRJEB8981	95092	614	SAMEA1099168	2016-07-05	Illumina MiSeq	Italy	Europe	Italy	SAMEA1099168	cryoconite	SAMEA1099168	46.3953	10.5898	Other alpine regions
f62	ERR2508393	PRJEB8981	80182	622	SAMEA1099163	2016-07-05	Illumina MiSeq	Italy	Europe	Italy	SAMEA1099163	cryoconite	SAMEA1099163	46.3953	10.5899	Other alpine regions
f96	ERR2508446	PRJEB8981	74806	603	SAMEA1099223	2016-09-02	Illumina MiSeq	Italy	Europe	Italy	SAMEA1099223	cryoconite	SAMEA1099223	46.3953	10.5899	Other alpine regions
f58	ERR2508407	PRJEB8981	96423	681	SAMEA1099179	2016-07-05	Illumina MiSeq	Italy	Europe	Italy	SAMEA1099179	cryoconite	SAMEA1099179	46.3953	10.59	Other alpine regions
f85	ERR2508435	PRJEB8981	152338	691	SAMEA1099210	2016-08-16	Illumina MiSeq	Italy	Europe	Italy	SAMEA1099210	cryoconite	SAMEA1099210	46.3954	10.5899	Other alpine regions
f53	ERR2508402	PRJEB8981	71160	612	SAMEA1099173	2016-07-05	Illumina MiSeq	Italy	Europe	Italy	SAMEA1099173	cryoconite	SAMEA1099173	46.3954	10.5898	Other alpine regions
f71	ERR2508401	PRJEB8981	80687	625	SAMEA1099172	2016-07-05	Illumina MiSeq	Italy	Europe	Italy	SAMEA1099172	cryoconite	SAMEA1099172	46.3954	10.5898	Other alpine regions
f54	ERR2508403	PRJEB8981	107344	670	SAMEA1099174	2016-07-05	Illumina MiSeq	Italy	Europe	Italy	SAMEA1099174	cryoconite	SAMEA1099174	46.3954	10.5897	Other alpine regions
f68	ERR2508398	PRJEB8981	87524	606	SAMEA1099169	2016-07-05	Illumina MiSeq	Italy	Europe	Italy	SAMEA1099169	cryoconite	SAMEA1099169	46.3954	10.5899	Other alpine regions
f70	ERR2508400	PRJEB8981	118805	674	SAMEA1099171	2016-07-05	Illumina MiSeq	Italy	Europe	Italy	SAMEA1099171	cryoconite	SAMEA1099171	46.3954	10.5898	Other alpine regions
f56	ERR2508405	PRJEB8981	123365	668	SAMEA1099177	2016-07-05	Illumina MiSeq	Italy	Europe	Italy	SAMEA1099177	cryoconite	SAMEA1099177	46.3954	10.5898	Other alpine regions
f63	ERR2508412	PRJEB8981	122159	614	SAMEA1099184	2016-07-05	Illumina MiSeq	Italy	Europe	Italy	SAMEA1099184	cryoconite	SAMEA1099184	46.3954	10.5901	Other alpine regions
f61	ERR2508410	PRJEB8981	121473	658	SAMEA1099182	2016-07-05	Illumina MiSeq	Italy	Europe	Italy	SAMEA1099182	cryoconite	SAMEA1099182	46.3954	10.59	Other alpine regions
f55	ERR2508404	PRJEB8981	124443	662	SAMEA1099175	2016-07-05	Illumina MiSeq	Italy	Europe	Italy	SAMEA1099175	cryoconite	SAMEA1099175	46.3955	10.5897	Other alpine regions
f59	ERR2508408	PRJEB8981	91225	617	SAMEA1099180	2016-07-05	Illumina MiSeq	Italy	Europe	Italy	SAMEA1099180	cryoconite	SAMEA1099180	46.3955	10.59	Other alpine regions
f60	ERR2508409	PRJEB8981	148316	688	SAMEA1099181	2016-07-05	Illumina MiSeq	Italy	Europe	Italy	SAMEA1099181	cryoconite	SAMEA1099181	46.3955	10.59	Other alpine regions
f97	ERR2508447	PRJEB8981	95694	660	SAMEA1099224	2016-09-02	Illumina MiSeq	Italy	Europe	Italy	SAMEA1099224	cryoconite	SAMEA1099224	46.3955	10.5897	Other alpine regions
f57	ERR2508406	PRJEB8981	129495	681	SAMEA1099178	2016-07-05	Illumina MiSeq	Italy	Europe	Italy	SAMEA1099178	cryoconite	SAMEA1099178	46.3955	10.5899	Other alpine regions
f31	ERR2508390	PRJEB8981	78388	759	SAMEA1099160	2015-07-01	Illumina MiSeq	Italy	Europe	Italy	SAMEA1099160	cryoconite	SAMEA1099160	46.3977	10.5858	Other alpine regions
f30	ERR2508389	PRJEB8981	15098	420	SAMEA1099159	2015-07-01	Illumina MiSeq	Italy	Europe	Italy	SAMEA1099159	cryoconite	SAMEA1099159	46.3977	10.5858	Other alpine regions
f33	ERR2508391	PRJEB8981	29990	504	SAMEA1099161	2015-07-01	Illumina MiSeq	Italy	Europe	Italy	SAMEA1099161	cryoconite	SAMEA1099161	46.3978	10.5917	Other alpine regions
f29	ERR2508388	PRJEB8981	56876	555	SAMEA1099158	2015-07-01	Illumina MiSeq	Italy	Europe	Italy	SAMEA1099158	cryoconite	SAMEA1099158	46.3978	10.5858	Other alpine regions
f27	ERR2508386	PRJEB8981	136882	738	SAMEA1099155	2015-07-01	Illumina MiSeq	Italy	Europe	Italy	SAMEA1099155	cryoconite	SAMEA1099155	46.3978	10.5858	Other alpine regions
f28	ERR2508387	PRJEB8981	35441	508	SAMEA1099156	2015-07-01	Illumina MiSeq	Italy	Europe	Italy	SAMEA1099156	cryoconite	SAMEA1099156	46.3978	10.5858	Other alpine regions
f34	ERR2508392	PRJEB8981	39088	539	SAMEA1099162	2015-07-01	Illumina MiSeq	Italy	Europe	Italy	SAMEA1099162	cryoconite	SAMEA1099162	46.3979	10.5916	Other alpine regions
f21	ERR2508359	PRJEB8981	25605	361	SAMEA1099123	2012-07-16	Illumina MiSeq	Italy	Europe	Italy	SAMEA1099123	cryoconite	SAMEA1099123	46.3982	10.5855	Other alpine regions
f1	ERR2508360	PRJEB8981	62216	460	SAMEA1099124	2012-07-16	Illumina MiSeq	Italy	Europe	Italy	SAMEA1099124	cryoconite	SAMEA1099124	46.3982	10.5855	Other alpine regions
f24	ERR2508383	PRJEB8981	67016	716	SAMEA1099150	2015-07-01	Illumina MiSeq	Italy	Europe	Italy	SAMEA1099150	cryoconite	SAMEA1099150	46.3983	10.5855	Other alpine regions
f249	ERR834163	PRJEB8981	10866	316	SAMEA3316347	2013-09-25	Illumina MiSeq	Italy	Europe		SAMEA3316347	Cryoconite	SAMEA3316347	-10.5855	-46.3983	Other alpine regions
f215	ERR834129	PRJEB8981	34979	405	SAMEA3316311	2013-08-28	Illumina MiSeq	Italy	Europe		SAMEA3316311	Cryoconite	SAMEA3316311	-10.5854	-46.3982	Other alpine regions
f246	ERR834160	PRJEB8981	9831	273	SAMEA3316344	2013-09-25	Illumina MiSeq	Italy	Europe		SAMEA3316344	Cryoconite	SAMEA3316344	-10.5854	-46.3984	Other alpine regions
f227	ERR834141	PRJEB8981	28511	389	SAMEA3316305	2013-08-28	Illumina MiSeq	Italy	Europe		SAMEA3316305	Cryoconite	SAMEA3316305	-10.5854	-46.3982	Other alpine regions
f231	ERR834145	PRJEB8981	36243	437	SAMEA3316309	2013-08-28	Illumina MiSeq	Italy	Europe		SAMEA3316309	Cryoconite	SAMEA3316309	-10.5854	-46.3982	Other alpine regions
f237	ERR834151	PRJEB8981	13855	325	SAMEA3316354	2013-09-25	Illumina MiSeq	Italy	Europe		SAMEA3316354	Cryoconite	SAMEA3316354	-10.5854	-46.3983	Other alpine regions
f239	ERR834153	PRJEB8981	78772	501	SAMEA3316356	2013-09-25	Illumina MiSeq	Italy	Europe		SAMEA3316356	Cryoconite	SAMEA3316356	-10.5854	-46.3983	Other alpine regions
f247	ERR834161	PRJEB8981	11559	294	SAMEA3316345	2013-09-25	Illumina MiSeq	Italy	Europe		SAMEA3316345	Cryoconite	SAMEA3316345	-10.5854	-46.3983	Other alpine regions
f252	ERR834166	PRJEB8981	10310	316	SAMEA3316350	2013-09-25	Illumina MiSeq	Italy	Europe		SAMEA3316350	Cryoconite	SAMEA3316350	-10.5852	-46.3979	Other alpine regions
f234	ERR834148	PRJEB8981	6615	267	SAMEA3316340	2013-09-25	Illumina MiSeq	Italy	Europe	Lombardia\, Valfurva	SAMEA3316340	Cryoconite	SAMEA3316340	10.5855	46.3982	Other alpine regions
f43	ERR2508432	PRJEB8981	118534	647	SAMEA1099207	2016-08-02	Illumina MiSeq	Italy	Europe	Italy	SAMEA1099207	cryoconite	SAMEA1099207	46.395	10.589	Other alpine regions
f20	ERR2508358	PRJEB8981	39056	381	SAMEA1099122	2012-07-16	Illumina MiSeq	Italy	Europe	Italy	SAMEA1099122	cryoconite	SAMEA1099122	46.3983	10.5857	Other alpine regions
f42	ERR2508380	PRJEB8981	70426	605	SAMEA1099147	2015-07-01	Illumina MiSeq	Italy	Europe	Italy	SAMEA1099147	cryoconite	SAMEA1099147	46.3983	10.5854	Other alpine regions
f23	ERR2508382	PRJEB8981	488246	889	SAMEA1099149	2015-07-01	Illumina MiSeq	Italy	Europe	Italy	SAMEA1099149	cryoconite	SAMEA1099149	46.3983	10.5855	Other alpine regions
f22	ERR2508381	PRJEB8981	36901	567	SAMEA1099148	2015-07-01	Illumina MiSeq	Italy	Europe	Italy	SAMEA1099148	cryoconite	SAMEA1099148	46.3984	10.5855	Other alpine regions
f40	ERR2508378	PRJEB8981	332437	744	SAMEA1099145	2015-07-01	Illumina MiSeq	Italy	Europe	Italy	SAMEA1099145	cryoconite	SAMEA1099145	46.3984	10.5855	Other alpine regions
f41	ERR2508379	PRJEB8981	119490	695	SAMEA1099146	2015-07-01	Illumina MiSeq	Italy	Europe	Italy	SAMEA1099146	cryoconite	SAMEA1099146	46.3984	10.5854	Other alpine regions
f19	ERR2508357	PRJEB8981	53110	420	SAMEA1099121	2012-07-16	Illumina MiSeq	Italy	Europe	Italy	SAMEA1099121	cryoconite	SAMEA1099121	46.3984	10.5856	Other alpine regions
f4	ERR2508363	PRJEB8981	62526	392	SAMEA1099128	2012-07-16	Illumina MiSeq	Italy	Europe	Italy	SAMEA1099128	cryoconite	SAMEA1099128	46.3984	10.5858	Other alpine regions
f3	ERR2508362	PRJEB8981	47392	400	SAMEA1099127	2012-07-16	Illumina MiSeq	Italy	Europe	Italy	SAMEA1099127	cryoconite	SAMEA1099127	46.3984	10.5857	Other alpine regions
f2	ERR2508361	PRJEB8981	55328	420	SAMEA1099125	2012-07-16	Illumina MiSeq	Italy	Europe	Italy	SAMEA1099125	cryoconite	SAMEA1099125	46.3985	10.5858	Other alpine regions
f5	ERR2508364	PRJEB8981	39859	377	SAMEA1099129	2012-07-16	Illumina MiSeq	Italy	Europe	Italy	SAMEA1099129	cryoconite	SAMEA1099129	46.3985	10.5858	Other alpine regions
f17	ERR2508355	PRJEB8981	61778	468	SAMEA1099118	2012-07-16	Illumina MiSeq	Italy	Europe	Italy	SAMEA1099118	cryoconite	SAMEA1099118	46.3985	10.5855	Other alpine regions
f18	ERR2508356	PRJEB8981	11386	302	SAMEA1099120	2012-07-16	Illumina MiSeq	Italy	Europe	Italy	SAMEA1099120	cryoconite	SAMEA1099120	46.3985	10.5855	Other alpine regions
f15	ERR2508353	PRJEB8981	38339	405	SAMEA1099116	2012-07-16	Illumina MiSeq	Italy	Europe	Italy	SAMEA1099116	cryoconite	SAMEA1099116	46.3986	10.5854	Other alpine regions
f6	ERR2508365	PRJEB8981	42622	336	SAMEA1099130	2012-07-16	Illumina MiSeq	Italy	Europe	Italy	SAMEA1099130	cryoconite	SAMEA1099130	46.3986	10.5858	Other alpine regions
f16	ERR2508354	PRJEB8981	81203	484	SAMEA1099117	2012-07-16	Illumina MiSeq	Italy	Europe	Italy	SAMEA1099117	cryoconite	SAMEA1099117	46.3986	10.5854	Other alpine regions
f14	ERR2508352	PRJEB8981	76235	504	SAMEA1099115	2012-07-16	Illumina MiSeq	Italy	Europe	Italy	SAMEA1099115	cryoconite	SAMEA1099115	46.3987	10.5854	Other alpine regions
f11	ERR2508351	PRJEB8981	29361	415	SAMEA1099113	2012-07-16	Illumina MiSeq	Italy	Europe	Italy	SAMEA1099113	cryoconite	SAMEA1099113	46.3987	10.5853	Other alpine regions
f7	ERR2508366	PRJEB8981	40454	389	SAMEA1099131	2012-07-16	Illumina MiSeq	Italy	Europe	Italy	SAMEA1099131	cryoconite	SAMEA1099131	46.3988	10.5859	Other alpine regions
f8	ERR2508367	PRJEB8981	41532	382	SAMEA1099132	2012-07-16	Illumina MiSeq	Italy	Europe	Italy	SAMEA1099132	cryoconite	SAMEA1099132	46.3988	10.5858	Other alpine regions
f13	ERR2508371	PRJEB8981	33372	381	SAMEA1099137	2012-07-16	Illumina MiSeq	Italy	Europe	Italy	SAMEA1099137	cryoconite	SAMEA1099137	46.3988	10.5855	Other alpine regions
f9	ERR2508368	PRJEB8981	66371	419	SAMEA1099133	2012-07-16	Illumina MiSeq	Italy	Europe	Italy	SAMEA1099133	cryoconite	SAMEA1099133	46.3988	10.5858	Other alpine regions
f12	ERR2508370	PRJEB8981	43670	405	SAMEA1099136	2012-07-16	Illumina MiSeq	Italy	Europe	Italy	SAMEA1099136	cryoconite	SAMEA1099136	46.3989	10.5858	Other alpine regions
f10	ERR2508369	PRJEB8981	50187	400	SAMEA1099135	2012-07-16	Illumina MiSeq	Italy	Europe	Italy	SAMEA1099135	cryoconite	SAMEA1099135	46.3989	10.5858	Other alpine regions
f39	ERR2508377	PRJEB8981	51215	602	SAMEA1099144	2015-07-01	Illumina MiSeq	Italy	Europe	Italy	SAMEA1099144	cryoconite	SAMEA1099144	46.399	10.5851	Other alpine regions
f38	ERR2508376	PRJEB8981	89604	674	SAMEA1099142	2015-07-01	Illumina MiSeq	Italy	Europe	Italy	SAMEA1099142	cryoconite	SAMEA1099142	46.399	10.5852	Other alpine regions
PRJNA1126602Sample1	SRR29486209	PRJNA1126602	21293	256	SAMN41947237	2023	Illumina MiSeq	Russia	Europe	Russia: Tyva\, Mongun-Taiga mountain range	SAMN41947237	cryoconite	SAMN41947237	50.28	90.15	Other alpine regions
PRJNA997912Sample22	SRR25396487	PRJNA997912	6486	1537	SAMN36692215	2020	Illumina MiSeq	Russia	Europe	Russia: Central Caucasus	SAMN36692215	cryoconite	SAMN36692215	43.1908	42.6458	Other alpine regions
PRJNA997912Sample3	SRR25396486	PRJNA997912	7645	1781	SAMN36692215	2020	Illumina MiSeq	Russia	Europe	Russia: Central Caucasus	SAMN36692215	cryoconite	SAMN36692215	43.1908	42.6458	Other alpine regions
PRJNA997912Sample53	SRR25396466	PRJNA997912	8539	1071	SAMN36692221	2020	Illumina MiSeq	Russia	Europe	Russia: Central Caucasus	SAMN36692221	cryoconite	SAMN36692221	43.305	42.4639	Other alpine regions
PRJNA997912Sample30	SRR25396495	PRJNA997912	7380	868	SAMN36692213	2020	Illumina MiSeq	Russia	Europe	Russia: Polar Ural	SAMN36692213	cryoconite	SAMN36692213	67.5756	66.0333	Other alpine regions
PRJNA997912Sample11	SRR25396496	PRJNA997912	9769	1014	SAMN36692213	2020	Illumina MiSeq	Russia	Europe	Russia: Polar Ural	SAMN36692213	cryoconite	SAMN36692213	67.5756	66.0333	Other alpine regions
PRJNA997912Sample72	SRR25396508	PRJNA997912	8351	945	SAMN36692210	2020	Illumina MiSeq	Russia	Europe	Russia: Severnaya Zemlya	SAMN36692210	cryoconite	SAMN36692210	79.0953	101.723	Other alpine regions
PRJNA997912Sample33	SRR25396507	PRJNA997912	8571	945	SAMN36692210	2020	Illumina MiSeq	Russia	Europe	Russia: Severnaya Zemlya	SAMN36692210	cryoconite	SAMN36692210	79.0953	101.723	Other alpine regions
PRJNA997912Sample2	SRR25396500	PRJNA997912	7026	723	SAMN36692207	2020	Illumina MiSeq	Russia	Europe	Russia: Severnaya Zemlya	SAMN36692207	cryoconite	SAMN36692207	79.0961	101.857	Other alpine regions
PRJNA997912Sample63	SRR25396450	PRJNA997912	7172	859	SAMN36692208	2020	Illumina MiSeq	Russia	Europe	Russia: Severnaya Zemlya	SAMN36692208	cryoconite	SAMN36692208	79.0978	101.858	Other alpine regions
PRJNA997912Sample54	SRR25396442	PRJNA997912	5676	634	SAMN36692209	2020	Illumina MiSeq	Russia	Europe	Russia: Severnaya Zemlya	SAMN36692209	cryoconite	SAMN36692209	79.1183	102.154	Other alpine regions
f896	SRR27784655	PRJNA1071093	12885	1273	SAMN39671699	2017-01-01	Illumina MiSeq	uncalculated	uncalculated	Antarctica: Taylor Valley	SAMN39671699	cryoconite	SAMN39671699	-77.6241	163.06	Antarctic
f864	SRR27784623	PRJNA1071093	9350	300	SAMN39671626	2019-01-01	Illumina MiSeq	uncalculated	uncalculated	Antarctica: Taylor Valley	SAMN39671626	cryoconite	SAMN39671626	-77.6101	162.955	Antarctic
PRJNA480849Sample201	SRR17375822	PRJNA480849	13048	504	SAMN24469117	2016-11-01	Illumina MiSeq	uncalculated	uncalculated	Antarctica: Taylor Valley	SAMN24469117	cryoconite	SAMN24469117	-77.7424	162.113	Antarctic
PRJNA480849Sample261	SRR17376055	PRJNA480849	8323	364	SAMN24469134	2016-11-01	Illumina MiSeq	uncalculated	uncalculated	Antarctica: Taylor Valley	SAMN24469134	cryoconite	SAMN24469134	-77.7418	162.125	Antarctic
PRJNA480849Sample314	SRR17376110	PRJNA480849	9615	660	SAMN24469068	2016-11-01	Illumina MiSeq	uncalculated	uncalculated	Antarctica: Taylor Valley	SAMN24469068	cryoconite	SAMN24469068	-77.6199	162.988	Antarctic
PRJNA480849Sample225	SRR17375865	PRJNA480849	6925	629	SAMN24469080	2016-11-01	Illumina MiSeq	uncalculated	uncalculated	Antarctica: Taylor Valley	SAMN24469080	cryoconite	SAMN24469080	-77.6186	163.004	Antarctic
PRJNA480849Sample293	SRR17375947	PRJNA480849	7717	574	SAMN24469087	2016-11-01	Illumina MiSeq	uncalculated	uncalculated	Antarctica: Taylor Valley	SAMN24469087	cryoconite	SAMN24469087	-77.5715	163.288	Antarctic
PRJNA480849Sample206	SRR17375840	PRJNA480849	6800	579	SAMN24469084	2016-11-01	Illumina MiSeq	uncalculated	uncalculated	Antarctica: Taylor Valley	SAMN24469084	Cryoconite	SAMN24469084	-77.5699	163.288	Antarctic
PRJNA514205Sample3	SRR8426639	PRJNA514205	26223	318	SAMN10721265	missing	Illumina MiSeq	uncalculated	uncalculated	Fildes Peninsula	SAMN10721265	cryoconite	SAMN10721265	missing	missing	Antarctic
f301	SRR10448615	PRJNA589711	7602	307	SAMN13290084	2016-09-10	Illumina MiSeq	uncalculated	uncalculated	Lewis Glacier, Mount Kenya	SAMN13290084	Cryoconite	SAMN13290084	missing	missing	Other alpine regions
f408	SRR12805403	PRJNA668398	14103	1039	SAMN16408933	2017-12-01	Illumina MiSeq	uncalculated	uncalculated	Antarctica: Taylor Valley	SAMN16408933	cryoconite	SAMN16408933	-77.6191	162.937	Antarctic
f410	SRR12805405	PRJNA668398	13151	902	SAMN16408931	2017-12-01	Illumina MiSeq	uncalculated	uncalculated	Antarctica: Taylor Valley	SAMN16408931	cryoconite	SAMN16408931	-77.6191	162.937	Antarctic
f401	SRR12805396	PRJNA668398	18393	926	SAMN16408922	2017-12-01	Illumina MiSeq	uncalculated	uncalculated	Antarctica: Taylor Valley	SAMN16408922	Cryoconite	SAMN16408922	-77.6191	162.937	Antarctic
f402	SRR12805397	PRJNA668398	23215	1255	SAMN16408939	2017-12-01	Illumina MiSeq	uncalculated	uncalculated	Antarctica: Taylor Valley	SAMN16408939	Cryoconite	SAMN16408939	-77.6191	162.937	Antarctic
f386	SRR12805381	PRJNA668398	12436	615	SAMN16408953	NA	Illumina MiSeq	uncalculated	uncalculated	Antarctica: Taylor Valley	SAMN16408953	cryoconite	SAMN16408953	NA	0	Antarctic
f102	ERR1700104	PRJEB16145	78126	439	SAMEA4520973		Illumina MiSeq			Baltoro Glacier (Concordia)	SAMEA4520973	Cryoconite	SAMEA4520973	0	0	Tibetan Plateau
f103	ERR1700105	PRJEB16145	37018	397	SAMEA4520974		Illumina MiSeq			Baltoro Glacier (Concordia)	SAMEA4520974	Cryoconite	SAMEA4520974	0	0	Tibetan Plateau
f104	ERR1700106	PRJEB16145	39969	470	SAMEA4520975		Illumina MiSeq			Baltoro Glacier (Concordia)	SAMEA4520975	Cryoconite	SAMEA4520975	0	0	Tibetan Plateau
f105	ERR1700107	PRJEB16145	82010	606	SAMEA4520976		Illumina MiSeq			Baltoro Glacier (Concordia)	SAMEA4520976	Cryoconite	SAMEA4520976	0	0	Tibetan Plateau
f106	ERR1700108	PRJEB16145	124127	649	SAMEA4520977		Illumina MiSeq			Baltoro Glacier (Concordia)	SAMEA4520977	Cryoconite	SAMEA4520977	0	0	Tibetan Plateau
f107	ERR1700109	PRJEB16145	41082	475	SAMEA4520978		Illumina MiSeq			Baltoro Glacier (Concordia)	SAMEA4520978	Cryoconite	SAMEA4520978	0	0	Tibetan Plateau
f108	ERR1700110	PRJEB16145	279864	545	SAMEA4520979		Illumina MiSeq			Baltoro Glacier (Concordia)	SAMEA4520979	Cryoconite	SAMEA4520979	0	0	Tibetan Plateau
f109	ERR1700111	PRJEB16145	283200	600	SAMEA4520980		Illumina MiSeq			Baltoro Glacier (Concordia)	SAMEA4520980	Cryoconite	SAMEA4520980	0	0	Tibetan Plateau
f110	ERR1700112	PRJEB16145	36446	456	SAMEA4520981		Illumina MiSeq			Baltoro Glacier (Concordia)	SAMEA4520981	Cryoconite	SAMEA4520981	0	0	Tibetan Plateau
f111	ERR1700113	PRJEB16145	89555	620	SAMEA4520982		Illumina MiSeq			Baltoro Glacier (Concordia)	SAMEA4520982	Cryoconite	SAMEA4520982	0	0	Tibetan Plateau
f112	ERR1700114	PRJEB16145	28844	428	SAMEA4520983		Illumina MiSeq			Baltoro Glacier (Concordia)	SAMEA4520983	Cryoconite	SAMEA4520983	0	0	Tibetan Plateau
f113	ERR1700115	PRJEB16145	54674	567	SAMEA4520984		Illumina MiSeq			Baltoro Glacier (Concordia)	SAMEA4520984	Cryoconite	SAMEA4520984	0	0	Tibetan Plateau
f114	ERR1700116	PRJEB16145	37548	492	SAMEA4520985		Illumina MiSeq			Baltoro Glacier (Concordia)	SAMEA4520985	Cryoconite	SAMEA4520985	0	0	Tibetan Plateau
f115	ERR1700117	PRJEB16145	223469	704	SAMEA4520986		Illumina MiSeq			Baltoro Glacier (Concordia)	SAMEA4520986	Cryoconite	SAMEA4520986	0	0	Tibetan Plateau
f116	ERR1700118	PRJEB16145	80496	577	SAMEA4520987		Illumina MiSeq			Baltoro Glacier (Concordia)	SAMEA4520987	Cryoconite	SAMEA4520987	0	0	Tibetan Plateau
f117	ERR1700119	PRJEB16145	106606	597	SAMEA4520988		Illumina MiSeq			Baltoro Glacier (Concordia)	SAMEA4520988	Cryoconite	SAMEA4520988	0	0	Tibetan Plateau
f118	ERR1700120	PRJEB16145	165594	751	SAMEA4520989		Illumina MiSeq			Baltoro Glacier (Concordia)	SAMEA4520989	Cryoconite	SAMEA4520989	0	0	Tibetan Plateau
f119	ERR1700121	PRJEB16145	32422	504	SAMEA4520990		Illumina MiSeq			Baltoro Glacier (Concordia)	SAMEA4520990	Cryoconite	SAMEA4520990	0	0	Tibetan Plateau
f120	ERR1700122	PRJEB16145	197566	854	SAMEA4520991		Illumina MiSeq			Baltoro Glacier (Concordia)	SAMEA4520991	Cryoconite	SAMEA4520991	0	0	Tibetan Plateau
f121	ERR1700123	PRJEB16145	217985	779	SAMEA4520992		Illumina MiSeq			Baltoro Glacier (Concordia)	SAMEA4520992	Cryoconite	SAMEA4520992	0	0	Tibetan Plateau
f122	ERR1700124	PRJEB16145	132009	765	SAMEA4520993		Illumina MiSeq			Baltoro Glacier (Concordia)	SAMEA4520993	Cryoconite	SAMEA4520993	0	0	Tibetan Plateau
f123	ERR1700125	PRJEB16145	44951	573	SAMEA4520994		Illumina MiSeq			Baltoro Glacier (Concordia)	SAMEA4520994	Cryoconite	SAMEA4520994	0	0	Tibetan Plateau
f124	ERR1700126	PRJEB16145	297860	856	SAMEA4520995		Illumina MiSeq			Baltoro Glacier (Concordia)	SAMEA4520995	Cryoconite	SAMEA4520995	0	0	Tibetan Plateau
f125	ERR1700127	PRJEB16145	122731	498	SAMEA4520996		Illumina MiSeq			Baltoro Glacier (Concordia)	SAMEA4520996	Cryoconite	SAMEA4520996	0	0	Tibetan Plateau
f126	ERR1700128	PRJEB16145	50483	409	SAMEA4520997		Illumina MiSeq			Baltoro Glacier (Concordia)	SAMEA4520997	Cryoconite	SAMEA4520997	0	0	Tibetan Plateau
f127	ERR1700129	PRJEB16145	23461	418	SAMEA4520998		Illumina MiSeq			Baltoro Glacier (Concordia)	SAMEA4520998	Cryoconite	SAMEA4520998	0	0	Tibetan Plateau
f128	ERR1700130	PRJEB16145	314872	758	SAMEA4520999		Illumina MiSeq			Baltoro Glacier (Concordia)	SAMEA4520999	Cryoconite	SAMEA4520999	0	0	Tibetan Plateau
f129	ERR1700131	PRJEB16145	265309	655	SAMEA4521000		Illumina MiSeq			Baltoro Glacier (Concordia)	SAMEA4521000	Cryoconite	SAMEA4521000	0	0	Tibetan Plateau
f130	ERR1700132	PRJEB16145	52514	539	SAMEA4521001		Illumina MiSeq			Baltoro Glacier (Concordia)	SAMEA4521001	Cryoconite	SAMEA4521001	0	0	Tibetan Plateau
f131	ERR1700133	PRJEB16145	35967	502	SAMEA4521002		Illumina MiSeq			Baltoro Glacier (Concordia)	SAMEA4521002	Cryoconite	SAMEA4521002	0	0	Tibetan Plateau
PRJDB8807Sample10	DRR192261	PRJDB8807	6207	457	SAMD00186055	2017-08-25	Illumina MiSeq	China	Asia	China:Urumqi Glacier No. 1	SAMD00186055	cryoconite granule	SAMD00186055	43.1	86.8	Tibetan Plateau
PRJDB8807Sample4	DRR192298	PRJDB8807	5846	330	SAMD00186092	2017-08-25	Illumina MiSeq	China	Asia	China:Urumqi Glacier No. 1	SAMD00186092	cryoconite granule	SAMD00186092	43.1	86.8	Tibetan Plateau
PRJDB8807Sample58	DRR192263	PRJDB8807	7214	436	SAMD00186057	2017-08-25	Illumina MiSeq	China	Asia	China:Urumqi Glacier No. 1	SAMD00186057	cryoconite granule	SAMD00186057	43.1	86.8	Tibetan Plateau
f1078	DRR147182	PRJDB7127	12258	541	SAMD00132212	2013-07-01	Illumina MiSeq	Greenland	North America	Greenland:Sermiarssupaluk	SAMD00132212	cryoconite granule	SAMD00132212	77.5014	-68.7566	Arctic
f1067	DRR147171	PRJDB7127	31013	776	SAMD00132201	2013-07-01	Illumina MiSeq	Greenland	North America	Greenland:Sermiarssupaluk	SAMD00132201	cryoconite granule	SAMD00132201	77.5014	-68.7566	Arctic
f1068	DRR147172	PRJDB7127	25688	643	SAMD00132202	2013-07-01	Illumina MiSeq	Greenland	North America	Greenland:Sermiarssupaluk	SAMD00132202	cryoconite granule	SAMD00132202	77.5014	-68.7566	Arctic
f1069	DRR147173	PRJDB7127	23038	564	SAMD00132203	2013-07-01	Illumina MiSeq	Greenland	North America	Greenland:Sermiarssupaluk	SAMD00132203	cryoconite granule	SAMD00132203	77.5014	-68.7566	Arctic
f1070	DRR147174	PRJDB7127	18588	417	SAMD00132204	2013-07-01	Illumina MiSeq	Greenland	North America	Greenland:Sermiarssupaluk	SAMD00132204	cryoconite granule	SAMD00132204	77.5014	-68.7566	Arctic
f1071	DRR147175	PRJDB7127	26071	629	SAMD00132205	2013-07-01	Illumina MiSeq	Greenland	North America	Greenland:Sermiarssupaluk	SAMD00132205	cryoconite granule	SAMD00132205	77.5014	-68.7566	Arctic
f1072	DRR147176	PRJDB7127	23576	526	SAMD00132206	2013-07-01	Illumina MiSeq	Greenland	North America	Greenland:Sermiarssupaluk	SAMD00132206	cryoconite granule	SAMD00132206	77.5014	-68.7566	Arctic
f1073	DRR147177	PRJDB7127	28297	344	SAMD00132207	2013-07-01	Illumina MiSeq	Greenland	North America	Greenland:Sermiarssupaluk	SAMD00132207	cryoconite granule	SAMD00132207	77.5014	-68.7566	Arctic
f1074	DRR147178	PRJDB7127	21876	515	SAMD00132208	2013-07-01	Illumina MiSeq	Greenland	North America	Greenland:Sermiarssupaluk	SAMD00132208	cryoconite granule	SAMD00132208	77.5014	-68.7566	Arctic
f1075	DRR147179	PRJDB7127	11485	127	SAMD00132209	2013-07-01	Illumina MiSeq	Greenland	North America	Greenland:Sermiarssupaluk	SAMD00132209	cryoconite granule	SAMD00132209	77.5014	-68.7566	Arctic
f1076	DRR147180	PRJDB7127	18890	118	SAMD00132210	2013-07-01	Illumina MiSeq	Greenland	North America	Greenland:Sermiarssupaluk	SAMD00132210	cryoconite granule	SAMD00132210	77.5014	-68.7566	Arctic
f1077	DRR147181	PRJDB7127	16565	447	SAMD00132211	2013-07-01	Illumina MiSeq	Greenland	North America	Greenland:Sermiarssupaluk	SAMD00132211	cryoconite granule	SAMD00132211	77.5014	-68.7566	Arctic
f1079	DRR147183	PRJDB7127	25107	603	SAMD00132213	2013-07-01	Illumina MiSeq	Greenland	North America	Greenland:Sermiarssupaluk	SAMD00132213	cryoconite granule	SAMD00132213	77.5014	-68.7566	Arctic
f1080	DRR147184	PRJDB7127	22158	467	SAMD00132214	2013-07-01	Illumina MiSeq	Greenland	North America	Greenland:Sermiarssupaluk	SAMD00132214	cryoconite granule	SAMD00132214	77.5014	-68.7566	Arctic
f1081	DRR147185	PRJDB7127	19170	148	SAMD00132215	2013-07-01	Illumina MiSeq	Greenland	North America	Greenland:Sermiarssupaluk	SAMD00132215	cryoconite granule	SAMD00132215	77.5014	-68.7566	Arctic
f997	DRR144669	PRJDB7127	15719	897	SAMD00131996	2013-07-01	Illumina MiSeq	Greenland	North America	Greenland:Hubbard Glacier	SAMD00131996	cryoconite granule	SAMD00131996	77.538	-67.8219	Arctic
f999	DRR144671	PRJDB7127	20264	1069	SAMD00131998	2013-07-01	Illumina MiSeq	Greenland	North America	Greenland:Hubbard Glacier	SAMD00131998	cryoconite granule	SAMD00131998	77.538	-67.8219	Arctic
f1000	DRR144672	PRJDB7127	14517	753	SAMD00131999	2013-07-01	Illumina MiSeq	Greenland	North America	Greenland:Hubbard Glacier	SAMD00131999	cryoconite granule	SAMD00131999	77.538	-67.8219	Arctic
f1002	DRR144674	PRJDB7127	18153	840	SAMD00132001	2013-07-01	Illumina MiSeq	Greenland	North America	Greenland:Hubbard Glacier	SAMD00132001	cryoconite granule	SAMD00132001	77.538	-67.8219	Arctic
f1004	DRR144676	PRJDB7127	16381	663	SAMD00132003	2013-07-01	Illumina MiSeq	Greenland	North America	Greenland:Hubbard Glacier	SAMD00132003	cryoconite granule	SAMD00132003	77.538	-67.8219	Arctic
f1005	DRR144677	PRJDB7127	21152	755	SAMD00132004	2013-07-01	Illumina MiSeq	Greenland	North America	Greenland:Hubbard Glacier	SAMD00132004	cryoconite granule	SAMD00132004	77.538	-67.8219	Arctic
f1006	DRR144678	PRJDB7127	23578	802	SAMD00132005	2013-07-01	Illumina MiSeq	Greenland	North America	Greenland:Hubbard Glacier	SAMD00132005	cryoconite granule	SAMD00132005	77.538	-67.8219	Arctic
f1007	DRR144679	PRJDB7127	35183	998	SAMD00132006	2013-07-01	Illumina MiSeq	Greenland	North America	Greenland:Hubbard Glacier	SAMD00132006	cryoconite granule	SAMD00132006	77.538	-67.8219	Arctic
f1104	DRR147208	PRJDB7127	15052	613	SAMD00132238	2013-07-01	Illumina MiSeq	Greenland	North America	Greenland:Syd Glacier	SAMD00132238	cryoconite granule	SAMD00132238	77.5603	-68.7049	Arctic
f1103	DRR147207	PRJDB7127	14787	637	SAMD00132237	2013-07-01	Illumina MiSeq	Greenland	North America	Greenland:Syd Glacier	SAMD00132237	cryoconite granule	SAMD00132237	77.5603	-68.7049	Arctic
f1030	DRR147134	PRJDB7127	28910	1098	SAMD00132164	2013-07-01	Illumina MiSeq	Greenland	North America	Greenland:No name glacier next of Tugoto Glacier	SAMD00132164	cryoconite granule	SAMD00132164	77.5603	-68.7049	Arctic
f1026	DRR147130	PRJDB7127	23216	1009	SAMD00132160	2013-07-01	Illumina MiSeq	Greenland	North America	Greenland:No name glacier next of Tugoto Glacier	SAMD00132160	cryoconite granule	SAMD00132160	77.5603	-68.7049	Arctic
f1100	DRR147204	PRJDB7127	16411	620	SAMD00132234	2013-07-01	Illumina MiSeq	Greenland	North America	Greenland:Syd Glacier	SAMD00132234	cryoconite granule	SAMD00132234	77.5603	-68.7049	Arctic
f1105	DRR147209	PRJDB7127	16973	583	SAMD00132239	2013-07-01	Illumina MiSeq	Greenland	North America	Greenland:Syd Glacier	SAMD00132239	cryoconite granule	SAMD00132239	77.5603	-68.7049	Arctic
f1102	DRR147206	PRJDB7127	18638	694	SAMD00132236	2013-07-01	Illumina MiSeq	Greenland	North America	Greenland:Syd Glacier	SAMD00132236	cryoconite granule	SAMD00132236	77.5603	-68.7049	Arctic
f1028	DRR147132	PRJDB7127	32901	1224	SAMD00132162	2013-07-01	Illumina MiSeq	Greenland	North America	Greenland:No name glacier next of Tugoto Glacier	SAMD00132162	cryoconite granule	SAMD00132162	77.5603	-68.7049	Arctic
f1025	DRR147129	PRJDB7127	47335	1311	SAMD00132159	2013-07-01	Illumina MiSeq	Greenland	North America	Greenland:No name glacier next of Tugoto Glacier	SAMD00132159	cryoconite granule	SAMD00132159	77.5603	-68.7049	Arctic
f1029	DRR147133	PRJDB7127	27105	858	SAMD00132163	2013-07-01	Illumina MiSeq	Greenland	North America	Greenland:No name glacier next of Tugoto Glacier	SAMD00132163	cryoconite granule	SAMD00132163	77.5603	-68.7049	Arctic
f1031	DRR147135	PRJDB7127	24508	849	SAMD00132165	2013-07-01	Illumina MiSeq	Greenland	North America	Greenland:No name glacier next of Tugoto Glacier	SAMD00132165	cryoconite granule	SAMD00132165	77.5603	-68.7049	Arctic
f1101	DRR147205	PRJDB7127	23570	636	SAMD00132235	2013-07-01	Illumina MiSeq	Greenland	North America	Greenland:Syd Glacier	SAMD00132235	cryoconite granule	SAMD00132235	77.5603	-68.7049	Arctic
f1055	DRR147159	PRJDB7127	26626	1092	SAMD00132189	2013-07-01	Illumina MiSeq	Greenland	North America	Greenland:Scarlet Heart Glacier	SAMD00132189	cryoconite granule	SAMD00132189	77.6536	-69.4266	Arctic
f1054	DRR147158	PRJDB7127	13749	863	SAMD00132188	2013-07-01	Illumina MiSeq	Greenland	North America	Greenland:Scarlet Heart Glacier	SAMD00132188	cryoconite granule	SAMD00132188	77.6536	-69.4266	Arctic
f1056	DRR147160	PRJDB7127	17401	887	SAMD00132190	2013-07-01	Illumina MiSeq	Greenland	North America	Greenland:Scarlet Heart Glacier	SAMD00132190	cryoconite granule	SAMD00132190	77.6536	-69.4266	Arctic
f1066	DRR147170	PRJDB7127	19025	835	SAMD00132200	2013-07-01	Illumina MiSeq	Greenland	North America	Greenland:Scarlet Heart Glacier	SAMD00132200	cryoconite granule	SAMD00132200	77.6536	-69.4266	Arctic
f1053	DRR147157	PRJDB7127	22330	932	SAMD00132187	2013-07-01	Illumina MiSeq	Greenland	North America	Greenland:Scarlet Heart Glacier	SAMD00132187	cryoconite granule	SAMD00132187	77.6536	-69.4266	Arctic
f1050	DRR147154	PRJDB7127	28886	996	SAMD00132184	2013-07-01	Illumina MiSeq	Greenland	North America	Greenland:Scarlet Heart Glacier	SAMD00132184	cryoconite granule	SAMD00132184	77.6536	-69.4266	Arctic
f1059	DRR147163	PRJDB7127	33781	888	SAMD00132193	2013-07-01	Illumina MiSeq	Greenland	North America	Greenland:Scarlet Heart Glacier	SAMD00132193	cryoconite granule	SAMD00132193	77.6536	-69.4266	Arctic
f1060	DRR147164	PRJDB7127	27949	769	SAMD00132194	2013-07-01	Illumina MiSeq	Greenland	North America	Greenland:Scarlet Heart Glacier	SAMD00132194	cryoconite granule	SAMD00132194	77.6536	-69.4266	Arctic
f1061	DRR147165	PRJDB7127	25708	843	SAMD00132195	2013-07-01	Illumina MiSeq	Greenland	North America	Greenland:Scarlet Heart Glacier	SAMD00132195	cryoconite granule	SAMD00132195	77.6536	-69.4266	Arctic
f1063	DRR147167	PRJDB7127	34268	1054	SAMD00132197	2013-07-01	Illumina MiSeq	Greenland	North America	Greenland:Scarlet Heart Glacier	SAMD00132197	cryoconite granule	SAMD00132197	77.6536	-69.4266	Arctic
f1064	DRR147168	PRJDB7127	26725	831	SAMD00132198	2013-07-01	Illumina MiSeq	Greenland	North America	Greenland:Scarlet Heart Glacier	SAMD00132198	cryoconite granule	SAMD00132198	77.6536	-69.4266	Arctic
f1065	DRR147169	PRJDB7127	27673	936	SAMD00132199	2013-07-01	Illumina MiSeq	Greenland	North America	Greenland:Scarlet Heart Glacier	SAMD00132199	cryoconite granule	SAMD00132199	77.6536	-69.4266	Arctic
f1044	DRR147148	PRJDB7127	23592	994	SAMD00132178	2013-07-01	Illumina MiSeq	Greenland	North America	Greenland:Scarlet Heart Glacier	SAMD00132178	cryoconite granule	SAMD00132178	77.6655	-69.4508	Arctic
f1033	DRR147137	PRJDB7127	12574	717	SAMD00132167	2013-07-01	Illumina MiSeq	Greenland	North America	Greenland:Scarlet Heart Glacier	SAMD00132167	cryoconite granule	SAMD00132167	77.6655	-69.4508	Arctic
f1039	DRR147143	PRJDB7127	18487	898	SAMD00132173	2013-07-01	Illumina MiSeq	Greenland	North America	Greenland:Scarlet Heart Glacier	SAMD00132173	cryoconite granule	SAMD00132173	77.6655	-69.4508	Arctic
f1040	DRR147144	PRJDB7127	18239	949	SAMD00132174	2013-07-01	Illumina MiSeq	Greenland	North America	Greenland:Scarlet Heart Glacier	SAMD00132174	cryoconite granule	SAMD00132174	77.6655	-69.4508	Arctic
f1038	DRR147142	PRJDB7127	16150	755	SAMD00132172	2013-07-01	Illumina MiSeq	Greenland	North America	Greenland:Scarlet Heart Glacier	SAMD00132172	cryoconite granule	SAMD00132172	77.6655	-69.4508	Arctic
f1046	DRR147150	PRJDB7127	20154	771	SAMD00132180	2013-07-01	Illumina MiSeq	Greenland	North America	Greenland:Scarlet Heart Glacier	SAMD00132180	cryoconite granule	SAMD00132180	77.6655	-69.4508	Arctic
f1042	DRR147146	PRJDB7127	25863	997	SAMD00132176	2013-07-01	Illumina MiSeq	Greenland	North America	Greenland:Scarlet Heart Glacier	SAMD00132176	cryoconite granule	SAMD00132176	77.6655	-69.4508	Arctic
f1045	DRR147149	PRJDB7127	22255	876	SAMD00132179	2013-07-01	Illumina MiSeq	Greenland	North America	Greenland:Scarlet Heart Glacier	SAMD00132179	cryoconite granule	SAMD00132179	77.6655	-69.4508	Arctic
f1047	DRR147151	PRJDB7127	33373	1156	SAMD00132181	2013-07-01	Illumina MiSeq	Greenland	North America	Greenland:Scarlet Heart Glacier	SAMD00132181	cryoconite granule	SAMD00132181	77.6655	-69.4508	Arctic
f1043	DRR147147	PRJDB7127	25133	928	SAMD00132177	2013-07-01	Illumina MiSeq	Greenland	North America	Greenland:Scarlet Heart Glacier	SAMD00132177	cryoconite granule	SAMD00132177	77.6655	-69.4508	Arctic
f1048	DRR147152	PRJDB7127	28706	976	SAMD00132182	2013-07-01	Illumina MiSeq	Greenland	North America	Greenland:Scarlet Heart Glacier	SAMD00132182	cryoconite granule	SAMD00132182	77.6655	-69.4508	Arctic
f1049	DRR147153	PRJDB7127	29277	981	SAMD00132183	2013-07-01	Illumina MiSeq	Greenland	North America	Greenland:Scarlet Heart Glacier	SAMD00132183	cryoconite granule	SAMD00132183	77.6655	-69.4508	Arctic
f1113	DRR147217	PRJDB7127	26192	1024	SAMD00132247	2013-07-01	Illumina MiSeq	Greenland	North America	Greenland:Qaqortoq Glacier	SAMD00132247	cryoconite granule	SAMD00132247	77.6683	-68.8197	Arctic
f1114	DRR147218	PRJDB7127	31242	1107	SAMD00132248	2013-07-01	Illumina MiSeq	Greenland	North America	Greenland:Qaqortoq Glacier	SAMD00132248	cryoconite granule	SAMD00132248	77.6683	-68.8197	Arctic
f991	DRR141361	PRJDB7127	17674	1060	SAMD00129964	2013-07-01	Illumina MiSeq	Greenland	North America	Greenland:Bowdoin Glacier	SAMD00129964	cryoconite granule	SAMD00129964	77.6691	-68.5827	Arctic
f981	DRR141351	PRJDB7127	12940	758	SAMD00129954	2013-07-01	Illumina MiSeq	Greenland	North America	Greenland:Bowdoin Glacier	SAMD00129954	cryoconite granule	SAMD00129954	77.6691	-68.5827	Arctic
f982	DRR141352	PRJDB7127	18689	991	SAMD00129955	2013-07-01	Illumina MiSeq	Greenland	North America	Greenland:Bowdoin Glacier	SAMD00129955	cryoconite granule	SAMD00129955	77.6691	-68.5827	Arctic
f978	DRR141348	PRJDB7127	25335	1301	SAMD00129951	2013-07-01	Illumina MiSeq	Greenland	North America	Greenland:Bowdoin Glacier	SAMD00129951	cryoconite granule	SAMD00129951	77.6691	-68.5827	Arctic
f979	DRR141349	PRJDB7127	23656	1167	SAMD00129952	2013-07-01	Illumina MiSeq	Greenland	North America	Greenland:Bowdoin Glacier	SAMD00129952	cryoconite granule	SAMD00129952	77.6691	-68.5827	Arctic
f986	DRR141356	PRJDB7127	24463	1169	SAMD00129959	2013-07-01	Illumina MiSeq	Greenland	North America	Greenland:Bowdoin Glacier	SAMD00129959	cryoconite granule	SAMD00129959	77.6691	-68.5827	Arctic
f990	DRR141360	PRJDB7127	23665	1087	SAMD00129963	2013-07-01	Illumina MiSeq	Greenland	North America	Greenland:Bowdoin Glacier	SAMD00129963	cryoconite granule	SAMD00129963	77.6691	-68.5827	Arctic
f995	DRR141365	PRJDB7127	25575	957	SAMD00129968	2013-07-01	Illumina MiSeq	Greenland	North America	Greenland:Bowdoin Glacier	SAMD00129968	cryoconite granule	SAMD00129968	77.6691	-68.5827	Arctic
f993	DRR141363	PRJDB7127	23128	842	SAMD00129966	2013-07-01	Illumina MiSeq	Greenland	North America	Greenland:Bowdoin Glacier	SAMD00129966	cryoconite granule	SAMD00129966	77.6691	-68.5827	Arctic
f980	DRR141350	PRJDB7127	14767	140	SAMD00129953	2013-07-01	Illumina MiSeq	Greenland	North America	Greenland:Bowdoin Glacier	SAMD00129953	cryoconite granule	SAMD00129953	77.6691	-68.5827	Arctic
f985	DRR141355	PRJDB7127	22083	778	SAMD00129958	2013-07-01	Illumina MiSeq	Greenland	North America	Greenland:Bowdoin Glacier	SAMD00129958	cryoconite granule	SAMD00129958	77.6691	-68.5827	Arctic
f992	DRR141362	PRJDB7127	23005	638	SAMD00129965	2013-07-01	Illumina MiSeq	Greenland	North America	Greenland:Bowdoin Glacier	SAMD00129965	cryoconite granule	SAMD00129965	77.6691	-68.5827	Arctic
f1090	DRR147194	PRJDB7127	21496	863	SAMD00132224	2013-07-01	Illumina MiSeq	Greenland	North America	Greenland:Sun Glacier	SAMD00132224	cryoconite granule	SAMD00132224	77.7766	-69.455	Arctic
f1094	DRR147198	PRJDB7127	13315	916	SAMD00132228	2013-07-01	Illumina MiSeq	Greenland	North America	Greenland:Sun Glacier	SAMD00132228	cryoconite granule	SAMD00132228	77.7766	-69.455	Arctic
f1091	DRR147195	PRJDB7127	19900	1065	SAMD00132225	2013-07-01	Illumina MiSeq	Greenland	North America	Greenland:Sun Glacier	SAMD00132225	cryoconite granule	SAMD00132225	77.7766	-69.455	Arctic
f1093	DRR147197	PRJDB7127	19094	1018	SAMD00132227	2013-07-01	Illumina MiSeq	Greenland	North America	Greenland:Sun Glacier	SAMD00132227	cryoconite granule	SAMD00132227	77.7766	-69.455	Arctic
f1096	DRR147200	PRJDB7127	26281	953	SAMD00132230	2013-07-01	Illumina MiSeq	Greenland	North America	Greenland:Sun Glacier	SAMD00132230	cryoconite granule	SAMD00132230	77.7766	-69.455	Arctic
f1086	DRR147190	PRJDB7127	29009	1097	SAMD00132220	2013-07-01	Illumina MiSeq	Greenland	North America	Greenland:Sun Glacier	SAMD00132220	cryoconite granule	SAMD00132220	77.7766	-69.455	Arctic
f1082	DRR147186	PRJDB7127	25128	798	SAMD00132216	2013-07-01	Illumina MiSeq	Greenland	North America	Greenland:Sun Glacier	SAMD00132216	cryoconite granule	SAMD00132216	77.7766	-69.455	Arctic
f1085	DRR147189	PRJDB7127	36550	670	SAMD00132219	2013-07-01	Illumina MiSeq	Greenland	North America	Greenland:Sun Glacier	SAMD00132219	cryoconite granule	SAMD00132219	77.7766	-69.455	Arctic
f1089	DRR147193	PRJDB7127	51785	1752	SAMD00132223	2013-07-01	Illumina MiSeq	Greenland	North America	Greenland:Sun Glacier	SAMD00132223	cryoconite granule	SAMD00132223	77.7766	-69.455	Arctic
f1095	DRR147199	PRJDB7127	38910	1399	SAMD00132229	2013-07-01	Illumina MiSeq	Greenland	North America	Greenland:Sun Glacier	SAMD00132229	cryoconite granule	SAMD00132229	77.7766	-69.455	Arctic
f1110	DRR147214	PRJDB7127	21448	973	SAMD00132244	2013-07-01	Illumina MiSeq	Greenland	North America	Greenland:Verhoeff Glacier	SAMD00132244	cryoconite granule	SAMD00132244	77.8605	-69.8688	Arctic
f1008	DRR144680	PRJDB7127	14235	869	SAMD00132007	2013-07-01	Illumina MiSeq	Greenland	North America	Greenland:Meehan Glacier	SAMD00132007	cryoconite granule	SAMD00132007	77.8744	-70.3127	Arctic
f1011	DRR144683	PRJDB7127	15317	869	SAMD00132010	2013-07-01	Illumina MiSeq	Greenland	North America	Greenland:Meehan Glacier	SAMD00132010	cryoconite granule	SAMD00132010	77.8744	-70.3127	Arctic
f1013	DRR144685	PRJDB7127	27961	1275	SAMD00132012	2013-07-01	Illumina MiSeq	Greenland	North America	Greenland:Meehan Glacier	SAMD00132012	cryoconite granule	SAMD00132012	77.8744	-70.3127	Arctic
f1017	DRR144689	PRJDB7127	23728	905	SAMD00132016	2013-07-01	Illumina MiSeq	Greenland	North America	Greenland:Morris Jesup Glacier	SAMD00132016	cryoconite granule	SAMD00132016	77.8878	-71.1392	Arctic
f1019	DRR144691	PRJDB7127	21194	1065	SAMD00132018	2013-07-01	Illumina MiSeq	Greenland	North America	Greenland:Morris Jesup Glacier	SAMD00132018	cryoconite granule	SAMD00132018	77.8878	-71.1392	Arctic
f1016	DRR144688	PRJDB7127	24733	836	SAMD00132015	2013-07-01	Illumina MiSeq	Greenland	North America	Greenland:Morris Jesup Glacier	SAMD00132015	cryoconite granule	SAMD00132015	77.8878	-71.1392	Arctic
f1020	DRR144692	PRJDB7127	19311	640	SAMD00132019	2013-07-01	Illumina MiSeq	Greenland	North America	Greenland:Morris Jesup Glacier	SAMD00132019	cryoconite granule	SAMD00132019	77.8878	-71.1392	Arctic
f1015	DRR144687	PRJDB7127	27731	792	SAMD00132014	2013-07-01	Illumina MiSeq	Greenland	North America	Greenland:Morris Jesup Glacier	SAMD00132014	cryoconite granule	SAMD00132014	77.8878	-71.1392	Arctic
PRJNA318626Sample64	SRR3396552	PRJNA318626	5822	364	SAMN04851323	2014-07-03	Illumina MiSeq	Greenland	North America	Greenland: S6	SAMN04851323	cryoconite granule	SAMN04851323	67.0457	-49.2383	Arctic
PRJNA318626Sample15	SRR3397078	PRJNA318626	13912	753	SAMN04851377	2014-07-17	Illumina MiSeq	Greenland	North America	Greenland: S6	SAMN04851377	cryoconite granule	SAMN04851377	67.0457	-49.2383	Arctic
PRJNA318626Sample28	SRR3396497	PRJNA318626	6169	376	SAMN04851319	2014-06-26	Illumina MiSeq	Greenland	North America	Greenland: S6	SAMN04851319	cryoconite granule	SAMN04851319	67.0472	-49.23	Arctic
PRJNA1126602Sample3	SRR29486207	PRJNA1126602	12365	516	SAMN41947239	2023	Illumina MiSeq	Russia	Russia	Russia: Tyva, Mongun-Taiga mountain range	PRJNA1126602	cryoconite granule	SAMN41947239	50.29	90.16	Other alpine regions
PRJNA997912Sample9	SRR25396463	PRJNA997912	5812	1084	SAMN36692216	2020	Illumina MiSeq	Russia	Europe	Russia: Central Caucasus	SAMN36692216	cryoconite granule	SAMN36692216	43.1908	42.6458	Other alpine regions
PRJNA997912Sample26	SRR25396467	PRJNA997912	10974	955	SAMN36692220	2020	Illumina MiSeq	Russia	Europe	Russia: Central Caucasus	SAMN36692220	cryoconite granule	SAMN36692220	43.305	42.4639	Other alpine regions
PRJNA997912Sample4	SRR25396468	PRJNA997912	13835	1087	SAMN36692220	2020	Illumina MiSeq	Russia	Europe	Russia: Central Caucasus	SAMN36692220	cryoconite granule	SAMN36692220	43.305	42.4639	Other alpine regions
PRJNA997912Sample66	SRR25396509	PRJNA997912	9542	961	SAMN36692210	2020	Illumina MiSeq	Russia	Europe	Russia: Severnaya Zemlya	SAMN36692210	cryoconite granule	SAMN36692210	79.0953	101.723	Other alpine regions
PRJNA997912Sample32	SRR25396503	PRJNA997912	6776	726	SAMN36692207	2020	Illumina MiSeq	Russia	Europe	Russia: Severnaya Zemlya	SAMN36692207	cryoconite granule	SAMN36692207	79.0961	101.857	Other alpine regions
PRJNA997912Sample45	SRR25396489	PRJNA997912	7250	741	SAMN36692207	2020	Illumina MiSeq	Russia	Europe	Russia: Severnaya Zemlya	SAMN36692207	cryoconite granule	SAMN36692207	79.0961	101.857	Other alpine regions
PRJNA997912Sample46	SRR25396462	PRJNA997912	6853	831	SAMN36692208	2020	Illumina MiSeq	Russia	Europe	Russia: Severnaya Zemlya	SAMN36692208	cryoconite granule	SAMN36692208	79.0978	101.858	Other alpine regions
PRJNA997912Sample48	SRR25396504	PRJNA997912	7083	705	SAMN36692209	2020	Illumina MiSeq	Russia	Europe	Russia: Severnaya Zemlya	SAMN36692209	cryoconite granule	SAMN36692209	79.1183	102.154	Other alpine regions
PRJDB7285Sample17	DRR147511	PRJDB7285	24240	755	SAMD00134295	2016-07-01	Illumina MiSeq	Svalbard	Europe	Svalbard:Austre Broggerbreen\, NyAlesund	SAMD00134295	cryoconite granule	SAMD00134295	78.8926	11.8588	Other alpine regions
PRJDB7285Sample35	DRR147512	PRJDB7285	26101	700	SAMD00134296	2016-07-01	Illumina MiSeq	Svalbard	Europe	Svalbard:Austre Broggerbreen\, NyAlesund	SAMD00134296	cryoconite granule	SAMD00134296	78.8926	11.8588	Other alpine regions
PRJDB7285Sample27	DRR147513	PRJDB7285	28566	909	SAMD00134297	2016-07-01	Illumina MiSeq	Svalbard	Europe	Svalbard:Austre Broggerbreen\, NyAlesund	SAMD00134297	cryoconite granule	SAMD00134297	78.8926	11.8588	Other alpine regions
PRJDB7285Sample51	DRR147514	PRJDB7285	23741	593	SAMD00134298	2016-07-01	Illumina MiSeq	Svalbard	Europe	Svalbard:Austre Broggerbreen\, NyAlesund	SAMD00134298	cryoconite granule	SAMD00134298	78.8926	11.8588	Other alpine regions
PRJDB7285Sample32	DRR147515	PRJDB7285	23648	632	SAMD00134299	2016-07-01	Illumina MiSeq	Svalbard	Europe	Svalbard:Austre Broggerbreen\, NyAlesund	SAMD00134299	cryoconite granule	SAMD00134299	78.8926	11.8588	Other alpine regions
PRJDB7285Sample46	DRR147522	PRJDB7285	26602	797	SAMD00134306	2016-07-01	Illumina MiSeq	Svalbard	Europe	Svalbard:Austre Broggerbreen\, NyAlesund	SAMD00134306	cryoconite granule	SAMD00134306	78.8941	11.819	Other alpine regions
PRJDB7285Sample57	DRR147523	PRJDB7285	24954	809	SAMD00134307	2016-07-01	Illumina MiSeq	Svalbard	Europe	Svalbard:Austre Broggerbreen\, NyAlesund	SAMD00134307	cryoconite granule	SAMD00134307	78.8941	11.819	Other alpine regions
PRJDB7285Sample16	DRR147524	PRJDB7285	26739	790	SAMD00134308	2016-07-01	Illumina MiSeq	Svalbard	Europe	Svalbard:Austre Broggerbreen\, NyAlesund	SAMD00134308	cryoconite granule	SAMD00134308	78.8941	11.819	Other alpine regions
PRJDB7285Sample19	DRR147525	PRJDB7285	22237	727	SAMD00134309	2016-07-01	Illumina MiSeq	Svalbard	Europe	Svalbard:Austre Broggerbreen\, NyAlesund	SAMD00134309	cryoconite granule	SAMD00134309	78.8941	11.819	Other alpine regions
PRJDB7285Sample28	DRR147521	PRJDB7285	20818	700	SAMD00134305	2016-07-01	Illumina MiSeq	Svalbard	Europe	Svalbard:Austre Broggerbreen\, NyAlesund	SAMD00134305	cryoconite granule	SAMD00134305	78.8941	11.819	Other alpine regions
PRJDB7285Sample12	DRR147520	PRJDB7285	19469	1077	SAMD00134304	2016-07-01	Illumina MiSeq	Svalbard	Europe	Svalbard:Austre Broggerbreen\, NyAlesund	SAMD00134304	cryoconite granule	SAMD00134304	78.9016	11.8193	Other alpine regions
PRJDB7285Sample1	DRR147518	PRJDB7285	21329	1132	SAMD00134302	2016-07-01	Illumina MiSeq	Svalbard	Europe	Svalbard:Austre Broggerbreen\, NyAlesund	SAMD00134302	cryoconite granule	SAMD00134302	78.9016	11.8193	Other alpine regions
PRJDB7285Sample18	DRR147517	PRJDB7285	22395	1056	SAMD00134301	2016-07-01	Illumina MiSeq	Svalbard	Europe	Svalbard:Austre Broggerbreen\, NyAlesund	SAMD00134301	cryoconite granule	SAMD00134301	78.9016	11.8193	Other alpine regions
PRJDB7285Sample4	DRR147501	PRJDB7285	24091	858	SAMD00134285	2016-07-01	Illumina MiSeq	Svalbard	Europe	Svalbard:Austre Broggerbreen\, NyAlesund	SAMD00134285	cryoconite granule	SAMD00134285	78.9018	11.8281	Other alpine regions
PRJDB7285Sample36	DRR147503	PRJDB7285	22006	789	SAMD00134287	2016-07-01	Illumina MiSeq	Svalbard	Europe	Svalbard:Austre Broggerbreen\, NyAlesund	SAMD00134287	cryoconite granule	SAMD00134287	78.9018	11.8281	Other alpine regions
PRJDB7285Sample62	DRR147504	PRJDB7285	27459	869	SAMD00134288	2016-07-01	Illumina MiSeq	Svalbard	Europe	Svalbard:Austre Broggerbreen\, NyAlesund	SAMD00134288	cryoconite granule	SAMD00134288	78.9018	11.8281	Other alpine regions
PRJDB7285Sample42	DRR147505	PRJDB7285	23593	808	SAMD00134289	2016-07-01	Illumina MiSeq	Svalbard	Europe	Svalbard:Austre Broggerbreen\, NyAlesund	SAMD00134289	cryoconite granule	SAMD00134289	78.9018	11.8281	Other alpine regions
f826	SRR27784585	PRJNA1071093	9610	974	SAMN39671646	2018-01-01	Illumina MiSeq	uncalculated	uncalculated	Antarctica: Taylor Valley	SAMN39671646	cryoconite granule	SAMN39671646	-77.6101	162.955	Antarctic
f837	SRR27784596	PRJNA1071093	16137	1332	SAMN39671636	2018-01-01	Illumina MiSeq	uncalculated	uncalculated	Antarctica: Taylor Valley	SAMN39671636	cryoconite granule	SAMN39671636	-77.6101	162.955	Antarctic
f871	SRR27784630	PRJNA1071093	17845	1164	SAMN39671620	2018-01-01	Illumina MiSeq	uncalculated	uncalculated	Antarctica: Taylor Valley	SAMN39671620	cryoconite granule	SAMN39671620	-77.6101	162.955	Antarctic
f850	SRR27784609	PRJNA1071093	19956	1326	SAMN39671668	2018-01-01	Illumina MiSeq	uncalculated	uncalculated	Antarctica: Taylor Valley	SAMN39671668	cryoconite granule	SAMN39671668	-77.6101	162.955	Antarctic
f861	SRR27784620	PRJNA1071093	16627	1216	SAMN39671629	2018-01-01	Illumina MiSeq	uncalculated	uncalculated	Antarctica: Taylor Valley	SAMN39671629	cryoconite granule	SAMN39671629	-77.6101	162.955	Antarctic
f865	SRR27784624	PRJNA1071093	13284	1043	SAMN39671625	2019-01-01	Illumina MiSeq	uncalculated	uncalculated	Antarctica: Taylor Valley	SAMN39671625	cryoconite granule	SAMN39671625	-77.6101	162.955	Antarctic
f870	SRR27784629	PRJNA1071093	16010	1143	SAMN39671621	2018-01-01	Illumina MiSeq	uncalculated	uncalculated	Antarctica: Taylor Valley	SAMN39671621	cryoconite granule	SAMN39671621	-77.6101	162.955	Antarctic
f883	SRR27784642	PRJNA1071093	21004	1233	SAMN39671609	2018-01-01	Illumina MiSeq	uncalculated	uncalculated	Antarctica: Taylor Valley	SAMN39671609	cryoconite granule	SAMN39671609	-77.6101	162.955	Antarctic
f812	SRR27784571	PRJNA1071093	17967	1169	SAMN39671659	2018-01-01	Illumina MiSeq	uncalculated	uncalculated	Antarctica: Taylor Valley	SAMN39671659	cryoconite granule	SAMN39671659	-77.6101	162.955	Antarctic
f849	SRR27784608	PRJNA1071093	22442	1164	SAMN39671669	2018-01-01	Illumina MiSeq	uncalculated	uncalculated	Antarctica: Taylor Valley	SAMN39671669	cryoconite granule	SAMN39671669	-77.6101	162.955	Antarctic
f899	SRR27784658	PRJNA1071093	20695	1258	SAMN39671696	2018-01-01	Illumina MiSeq	uncalculated	uncalculated	Antarctica: Taylor Valley	SAMN39671696	cryoconite granule	SAMN39671696	-77.6101	162.955	Antarctic
f818	SRR27784577	PRJNA1071093	18799	1163	SAMN39671600	2019-01-01	Illumina MiSeq	uncalculated	uncalculated	Antarctica: Taylor Valley	SAMN39671600	cryoconite granule	SAMN39671600	-77.6101	162.955	Antarctic
f821	SRR27784580	PRJNA1071093	24577	1189	SAMN39671651	2018-01-01	Illumina MiSeq	uncalculated	uncalculated	Antarctica: Taylor Valley	SAMN39671651	cryoconite granule	SAMN39671651	-77.6101	162.955	Antarctic
f840	SRR27784599	PRJNA1071093	8265	247	SAMN39671598	2019-01-01	Illumina MiSeq	uncalculated	uncalculated	Antarctica: Taylor Valley	SAMN39671598	cryoconite granule	SAMN39671598	-77.6101	162.955	Antarctic
f889	SRR27784648	PRJNA1071093	22056	1197	SAMN39671705	2016-11-01	Illumina MiSeq	uncalculated	uncalculated	Antarctica: Taylor Valley	SAMN39671705	cryoconite granule	SAMN39671705	-77.6092	162.929	Antarctic
f1232	SRR2553769	PRJNA296701	29910	2152	SAMN04102412	2010-01-05	Illumina MiSeq	uncalculated	uncalculated	Antarctica	SAMN04102412	cryoconite granule	SAMN04102412	-78.1	165.03	Antarctic
PRJNA480849Sample209	SRR17376068	PRJNA480849	7443	321	SAMN24469122	2016-11-01	Illumina MiSeq	uncalculated	uncalculated	Antarctica: Taylor Valley	SAMN24469122	cryoconite granule	SAMN24469122	-77.7426	162.113	Antarctic
PRJNA480849Sample84	SRR17376069	PRJNA480849	6953	351	SAMN24469121	2016-11-01	Illumina MiSeq	uncalculated	uncalculated	Antarctica: Taylor Valley	SAMN24469121	cryoconite granule	SAMN24469121	-77.7426	162.113	Antarctic
PRJNA480849Sample306	SRR17375828	PRJNA480849	9562	501	SAMN24469111	2016-11-01	Illumina MiSeq	uncalculated	uncalculated	Antarctica: Taylor Valley	SAMN24469111	cryoconite granule	SAMN24469111	-77.7416	162.105	Antarctic
PRJNA480849Sample349	SRR17376053	PRJNA480849	7686	431	SAMN24469136	2016-11-01	Illumina MiSeq	uncalculated	uncalculated	Antarctica: Taylor Valley	SAMN24469136	cryoconite granule	SAMN24469136	-77.7399	162.127	Antarctic
PRJNA480849Sample55	SRR17375818	PRJNA480849	5620	391	SAMN24469058	2016-11-01	Illumina MiSeq	uncalculated	uncalculated	Antarctica: Taylor Valley	SAMN24469058	cryoconite granule	SAMN24469058	-77.6206	162.991	Antarctic
PRJNA480849Sample12	SRR17376121	PRJNA480849	7594	655	SAMN24469067	2016-11-01	Illumina MiSeq	uncalculated	uncalculated	Antarctica: Taylor Valley	SAMN24469067	cryoconite granule	SAMN24469067	-77.6199	162.988	Antarctic
PRJNA480849Sample218	SRR17375891	PRJNA480849	6444	563	SAMN24469074	2016-11-01	Illumina MiSeq	uncalculated	uncalculated	Antarctica: Taylor Valley	SAMN24469074	cryoconite granule	SAMN24469074	-77.6198	163.001	Antarctic
PRJNA480849Sample269	SRR17376045	PRJNA480849	7454	637	SAMN24469063	2016-11-01	Illumina MiSeq	uncalculated	uncalculated	Antarctica: Taylor Valley	SAMN24469063	cryoconite granule	SAMN24469063	-77.6197	162.988	Antarctic
PRJNA480849Sample288	SRR17375804	PRJNA480849	14013	749	SAMN24469071	2016-11-01	Illumina MiSeq	uncalculated	uncalculated	Antarctica: Taylor Valley	SAMN24469071	cryoconite granule	SAMN24469071	-77.6197	163.002	Antarctic
PRJNA480849Sample318	SRR17376019	PRJNA480849	8019	665	SAMN24469069	2016-11-01	Illumina MiSeq	uncalculated	uncalculated	Antarctica: Taylor Valley	SAMN24469069	cryoconite granule	SAMN24469069	-77.6196	163.001	Antarctic
PRJNA480849Sample108	SRR17375816	PRJNA480849	12045	788	SAMN24469070	2016-11-01	Illumina MiSeq	uncalculated	uncalculated	Antarctica: Taylor Valley	SAMN24469070	cryoconite granule	SAMN24469070	-77.6196	163.001	Antarctic
PRJNA480849Sample313	SRR17375943	PRJNA480849	8977	634	SAMN24469055	2016-11-01	Illumina MiSeq	uncalculated	uncalculated	Antarctica: Taylor Valley	SAMN24469055	cryoconite granule	SAMN24469055	-77.6196	162.995	Antarctic
PRJNA480849Sample9	SRR17376149	PRJNA480849	6363	622	SAMN24469051	2016-11-01	Illumina MiSeq	uncalculated	uncalculated	Antarctica: Taylor Valley	SAMN24469051	cryoconite granule	SAMN24469051	-77.6194	162.995	Antarctic
PRJNA480849Sample273	SRR17375880	PRJNA480849	10554	720	SAMN24469075	2016-11-01	Illumina MiSeq	uncalculated	uncalculated	Antarctica: Taylor Valley	SAMN24469075	cryoconite granule	SAMN24469075	-77.6187	163.003	Antarctic
PRJNA480849Sample304	SRR17375876	PRJNA480849	10560	677	SAMN24469079	2016-11-01	Illumina MiSeq	uncalculated	uncalculated	Antarctica: Taylor Valley	SAMN24469079	cryoconite granule	SAMN24469079	-77.6186	163.004	Antarctic
PRJNA480849Sample168	SRR17375945	PRJNA480849	7722	723	SAMN24469089	2016-11-01	Illumina MiSeq	uncalculated	uncalculated	Antarctica: Taylor Valley	SAMN24469089	cryoconite granule	SAMN24469089	-77.5716	163.287	Antarctic
PRJNA480849Sample91	SRR17375944	PRJNA480849	5440	724	SAMN24469090	2016-11-01	Illumina MiSeq	uncalculated	uncalculated	Antarctica: Taylor Valley	SAMN24469090	cryoconite granule	SAMN24469090	-77.5716	163.287	Antarctic
PRJNA480849Sample327	SRR17375946	PRJNA480849	7352	563	SAMN24469088	2016-11-01	Illumina MiSeq	uncalculated	uncalculated	Antarctica: Taylor Valley	SAMN24469088	cryoconite granule	SAMN24469088	-77.5716	163.288	Antarctic
PRJNA480849Sample85	SRR17375941	PRJNA480849	9511	530	SAMN24469092	2016-11-01	Illumina MiSeq	uncalculated	uncalculated	Antarctica: Taylor Valley	SAMN24469092	cryoconite granule	SAMN24469092	-77.5714	163.287	Antarctic
PRJNA480849Sample136	SRR17375935	PRJNA480849	5553	549	SAMN24469098	2016-11-01	Illumina MiSeq	uncalculated	uncalculated	Antarctica: Taylor Valley	SAMN24469098	cryoconite granule	SAMN24469098	-77.5712	163.279	Antarctic
PRJNA480849Sample144	SRR17375936	PRJNA480849	6070	668	SAMN24469097	2016-11-01	Illumina MiSeq	uncalculated	uncalculated	Antarctica: Taylor Valley	SAMN24469097	cryoconite granule	SAMN24469097	-77.5712	163.279	Antarctic
PRJNA480849Sample41	SRR17375937	PRJNA480849	7398	656	SAMN24469096	2016-11-01	Illumina MiSeq	uncalculated	uncalculated	Antarctica: Taylor Valley	SAMN24469096	cryoconite granule	SAMN24469096	-77.571	163.279	Antarctic
PRJNA480849Sample323	SRR17375931	PRJNA480849	9533	901	SAMN24469101	2016-11-01	Illumina MiSeq	uncalculated	uncalculated	Antarctica: Taylor Valley	SAMN24469101	cryoconite granule	SAMN24469101	-77.5701	163.296	Antarctic
PRJNA480849Sample7	SRR17375836	PRJNA480849	8944	726	SAMN24469104	2016-11-01	Illumina MiSeq	uncalculated	uncalculated	Antarctica: Taylor Valley	SAMN24469104	cryoconite granule	SAMN24469104	-77.5701	163.295	Antarctic
PRJNA480849Sample17	SRR17375934	PRJNA480849	8185	777	SAMN24469099	2016-11-01	Illumina MiSeq	uncalculated	uncalculated	Antarctica: Taylor Valley	SAMN24469099	cryoconite granule	SAMN24469099	-77.5699	163.296	Antarctic
PRJNA480849Sample246	SRR17375954	PRJNA480849	7021	712	SAMN24469082	2016-11-01	Illumina MiSeq	uncalculated	uncalculated	Antarctica: Taylor Valley	SAMN24469082	cryoconite granule	SAMN24469082	-77.5699	163.289	Antarctic
PRJNA480849Sample45	SRR17375965	PRJNA480849	10529	672	SAMN24469081	2016-11-01	Illumina MiSeq	uncalculated	uncalculated	Antarctica: Taylor Valley	SAMN24469081	cryoconite granule	SAMN24469081	-77.5699	163.289	Antarctic
PRJNA480849Sample174	SRR17375851	PRJNA480849	7228	611	SAMN24469083	2016-11-01	Illumina MiSeq	uncalculated	uncalculated	Antarctica: Taylor Valley	SAMN24469083	cryoconite granule	SAMN24469083	-77.5699	163.288	Antarctic
PRJNA480849Sample139	SRR17376070	PRJNA480849	6683	638	SAMN24469086	2016-11-01	Illumina MiSeq	uncalculated	uncalculated	Antarctica: Taylor Valley	SAMN24469086	cryoconite granule	SAMN24469086	-77.5696	163.288	Antarctic
PRJNA480849Sample326	SRR17375832	PRJNA480849	8415	690	SAMN24469108	2016-11-01	Illumina MiSeq	uncalculated	uncalculated	Antarctica: Taylor Valley	SAMN24469108	cryoconite granule	SAMN24469108	-77.5687	163.299	Antarctic
PRJNA480849Sample343	SRR17375835	PRJNA480849	11724	780	SAMN24469105	2016-11-01	Illumina MiSeq	uncalculated	uncalculated	Antarctica: Taylor Valley	SAMN24469105	cryoconite granule	SAMN24469105	-77.5686	163.298	Antarctic
PRJNA480849Sample301	SRR17375831	PRJNA480849	9793	588	SAMN24469109	2016-11-01	Illumina MiSeq	uncalculated	uncalculated	Antarctica: Taylor Valley	SAMN24469109	cryoconite granule	SAMN24469109	-77.5685	163.299	Antarctic
f387	SRR12805382	PRJNA668398	17828	1029	SAMN16408952	2017-12-01	Illumina MiSeq	uncalculated	uncalculated	Antarctica: Taylor Valley	SAMN16408952	cryoconite granule	SAMN16408952	-77.7303	162.058	Antarctic
f404	SRR12805399	PRJNA668398	11665	933	SAMN16408937	2017-12-01	Illumina MiSeq	uncalculated	uncalculated	Antarctica: Taylor Valley	SAMN16408937	cryoconite granule	SAMN16408937	-77.6191	162.937	Antarctic
f413	SRR12805408	PRJNA668398	10274	686	SAMN16408920	2017-12-01	Illumina MiSeq	uncalculated	uncalculated	Antarctica: Taylor Valley	SAMN16408920	cryoconite granule	SAMN16408920	-77.6191	162.937	Antarctic
f405	SRR12805400	PRJNA668398	12234	914	SAMN16408936	2017-12-01	Illumina MiSeq	uncalculated	uncalculated	Antarctica: Taylor Valley	SAMN16408936	cryoconite granule	SAMN16408936	-77.6191	162.937	Antarctic
f412	SRR12805407	PRJNA668398	16034	1036	SAMN16408921	2017-12-01	Illumina MiSeq	uncalculated	uncalculated	Antarctica: Taylor Valley	SAMN16408921	cryoconite granule	SAMN16408921	-77.6191	162.937	Antarctic
f353	SRR12805341	PRJNA668398	14980	993	SAMN16408927	2017-12-01	Illumina MiSeq	uncalculated	uncalculated	Antarctica: Taylor Valley	SAMN16408927	cryoconite granule	SAMN16408927	-77.6191	162.937	Antarctic
f364	SRR12805352	PRJNA668398	16088	1001	SAMN16408926	2017-12-01	Illumina MiSeq	uncalculated	uncalculated	Antarctica: Taylor Valley	SAMN16408926	cryoconite granule	SAMN16408926	-77.6191	162.937	Antarctic
PRJNA997912Sample12	SRR25396454	PRJNA997912	8253	839	SAMN36692223	2020	Illumina MiSeq	uncalculated	uncalculated	Antarctica: Livingstone Island	SAMN36692223	cryoconite granule	SAMN36692223	-62.6856	-60.4056	Antarctic
PRJNA997912Sample41	SRR25396458	PRJNA997912	8307	656	SAMN36692222	2020	Illumina MiSeq	uncalculated	uncalculated	Antarctica: Livingstone Island	SAMN36692222	cryoconite granule	SAMN36692222	-62.6856	-60.4056	Antarctic
PRJNA997912Sample56	SRR25396439	PRJNA997912	9991	681	SAMN36692222	2020	Illumina MiSeq	uncalculated	uncalculated	Antarctica: Livingstone Island	SAMN36692222	cryoconite granule	SAMN36692222	-62.6856	-60.4056	Antarctic
f948	SRR7622963	PRJNA483479	17212	1393	SAMN09741807	2016-07-28	Illumina MiSeq	USA	North America	USA: Mount Adams	SAMN09741807	cryoconite granule	SAMN09741807	46.1599	-121.473	Other alpine regions
PRJDB8807Sample26	DRR192260	PRJDB8807	5897	457	SAMD00186054	2017-08-25	Illumina MiSeq	China	Asia	China:Urumqi Glacier No. 1	SAMD00186054	cryoconite hole	SAMD00186054	43.1	86.8	Tibetan Plateau
PRJDB8807Sample29	DRR192271	PRJDB8807	6070	443	SAMD00186065	2017-08-25	Illumina MiSeq	China	Asia	China:Urumqi Glacier No. 1	SAMD00186065	cryoconite hole	SAMD00186065	43.1	86.8	Tibetan Plateau
f1001	DRR144673	PRJDB7127	12531	714	SAMD00132000	2013-07-01	Illumina MiSeq	Greenland	North America	Greenland:Hubbard Glacier	SAMD00132000	cryoconite hole	SAMD00132000	77.538	-67.8219	Arctic
f998	DRR144670	PRJDB7127	16608	932	SAMD00131997	2013-07-01	Illumina MiSeq	Greenland	North America	Greenland:Hubbard Glacier	SAMD00131997	cryoconite hole	SAMD00131997	77.538	-67.8219	Arctic
f1003	DRR144675	PRJDB7127	17562	887	SAMD00132002	2013-07-01	Illumina MiSeq	Greenland	North America	Greenland:Hubbard Glacier	SAMD00132002	cryoconite hole	SAMD00132002	77.538	-67.8219	Arctic
f1024	DRR147128	PRJDB7127	21005	1083	SAMD00132158	2013-07-01	Illumina MiSeq	Greenland	North America	Greenland:No name glacier next of Tugoto Glacier	SAMD00132158	cryoconite hole	SAMD00132158	77.5603	-68.7049	Arctic
f1023	DRR147127	PRJDB7127	26130	1204	SAMD00132157	2013-07-01	Illumina MiSeq	Greenland	North America	Greenland:No name glacier next of Tugoto Glacier	SAMD00132157	cryoconite hole	SAMD00132157	77.5603	-68.7049	Arctic
f1062	DRR147166	PRJDB7127	13169	694	SAMD00132196	2013-07-01	Illumina MiSeq	Greenland	North America	Greenland:Scarlet Heart Glacier	SAMD00132196	cryoconite hole	SAMD00132196	77.6536	-69.4266	Arctic
f1057	DRR147161	PRJDB7127	16033	776	SAMD00132191	2013-07-01	Illumina MiSeq	Greenland	North America	Greenland:Scarlet Heart Glacier	SAMD00132191	cryoconite hole	SAMD00132191	77.6536	-69.4266	Arctic
f1052	DRR147156	PRJDB7127	21239	888	SAMD00132186	2013-07-01	Illumina MiSeq	Greenland	North America	Greenland:Scarlet Heart Glacier	SAMD00132186	cryoconite hole	SAMD00132186	77.6536	-69.4266	Arctic
f1051	DRR147155	PRJDB7127	22011	892	SAMD00132185	2013-07-01	Illumina MiSeq	Greenland	North America	Greenland:Scarlet Heart Glacier	SAMD00132185	cryoconite hole	SAMD00132185	77.6536	-69.4266	Arctic
f1036	DRR147140	PRJDB7127	14952	832	SAMD00132170	2013-07-01	Illumina MiSeq	Greenland	North America	Greenland:Scarlet Heart Glacier	SAMD00132170	cryoconite hole	SAMD00132170	77.6655	-69.4508	Arctic
f1035	DRR147139	PRJDB7127	15643	791	SAMD00132169	2013-07-01	Illumina MiSeq	Greenland	North America	Greenland:Scarlet Heart Glacier	SAMD00132169	cryoconite hole	SAMD00132169	77.6655	-69.4508	Arctic
f1034	DRR147138	PRJDB7127	16855	868	SAMD00132168	2013-07-01	Illumina MiSeq	Greenland	North America	Greenland:Scarlet Heart Glacier	SAMD00132168	cryoconite hole	SAMD00132168	77.6655	-69.4508	Arctic
f1032	DRR147136	PRJDB7127	15479	757	SAMD00132166	2013-07-01	Illumina MiSeq	Greenland	North America	Greenland:Scarlet Heart Glacier	SAMD00132166	cryoconite hole	SAMD00132166	77.6655	-69.4508	Arctic
f1112	DRR147216	PRJDB7127	14526	614	SAMD00132246	2013-07-01	Illumina MiSeq	Greenland	North America	Greenland:Qaqortoq Glacier	SAMD00132246	cryoconite hole	SAMD00132246	77.6683	-68.8197	Arctic
f983	DRR141353	PRJDB7127	17090	1074	SAMD00129956	2013-07-01	Illumina MiSeq	Greenland	North America	Greenland:Bowdoin Glacier	SAMD00129956	cryoconite hole	SAMD00129956	77.6691	-68.5827	Arctic
f977	DRR141347	PRJDB7127	22462	1185	SAMD00129950	2013-07-01	Illumina MiSeq	Greenland	North America	Greenland:Bowdoin Glacier	SAMD00129950	cryoconite hole	SAMD00129950	77.6691	-68.5827	Arctic
f989	DRR141359	PRJDB7127	17879	859	SAMD00129962	2013-07-01	Illumina MiSeq	Greenland	North America	Greenland:Bowdoin Glacier	SAMD00129962	cryoconite hole	SAMD00129962	77.6691	-68.5827	Arctic
f1088	DRR147192	PRJDB7127	17953	1006	SAMD00132222	2013-07-01	Illumina MiSeq	Greenland	North America	Greenland:Sun Glacier	SAMD00132222	cryoconite hole	SAMD00132222	77.7766	-69.455	Arctic
f1097	DRR147201	PRJDB7127	11643	614	SAMD00132231	2013-07-01	Illumina MiSeq	Greenland	North America	Greenland:Sun Glacier	SAMD00132231	cryoconite hole	SAMD00132231	77.7766	-69.455	Arctic
f1084	DRR147188	PRJDB7127	20129	1083	SAMD00132218	2013-07-01	Illumina MiSeq	Greenland	North America	Greenland:Sun Glacier	SAMD00132218	cryoconite hole	SAMD00132218	77.7766	-69.455	Arctic
f1098	DRR147202	PRJDB7127	17659	870	SAMD00132232	2013-07-01	Illumina MiSeq	Greenland	North America	Greenland:Sun Glacier	SAMD00132232	cryoconite hole	SAMD00132232	77.7766	-69.455	Arctic
f1087	DRR147191	PRJDB7127	23173	1132	SAMD00132221	2013-07-01	Illumina MiSeq	Greenland	North America	Greenland:Sun Glacier	SAMD00132221	cryoconite hole	SAMD00132221	77.7766	-69.455	Arctic
f1092	DRR147196	PRJDB7127	22395	1028	SAMD00132226	2013-07-01	Illumina MiSeq	Greenland	North America	Greenland:Sun Glacier	SAMD00132226	cryoconite hole	SAMD00132226	77.7766	-69.455	Arctic
f1083	DRR147187	PRJDB7127	23246	996	SAMD00132217	2013-07-01	Illumina MiSeq	Greenland	North America	Greenland:Sun Glacier	SAMD00132217	cryoconite hole	SAMD00132217	77.7766	-69.455	Arctic
f1106	DRR147210	PRJDB7127	18466	986	SAMD00132240	2013-07-01	Illumina MiSeq	Greenland	North America	Greenland:Verhoeff Glacier	SAMD00132240	cryoconite hole	SAMD00132240	77.8605	-69.8688	Arctic
f1108	DRR147212	PRJDB7127	20878	1085	SAMD00132242	2013-07-01	Illumina MiSeq	Greenland	North America	Greenland:Verhoeff Glacier	SAMD00132242	cryoconite hole	SAMD00132242	77.8605	-69.8688	Arctic
f1107	DRR147211	PRJDB7127	22582	1125	SAMD00132241	2013-07-01	Illumina MiSeq	Greenland	North America	Greenland:Verhoeff Glacier	SAMD00132241	cryoconite hole	SAMD00132241	77.8605	-69.8688	Arctic
f1014	DRR144686	PRJDB7127	23227	1076	SAMD00132013	2013-07-01	Illumina MiSeq	Greenland	North America	Greenland:Meehan Glacier	SAMD00132013	cryoconite hole	SAMD00132013	77.8744	-70.3127	Arctic
f1022	DRR144694	PRJDB7127	8988	573	SAMD00132021	2013-07-01	Illumina MiSeq	Greenland	North America	Greenland:Morris Jesup Glacier	SAMD00132021	cryoconite hole	SAMD00132021	77.8878	-71.1392	Arctic
f1018	DRR144690	PRJDB7127	18497	975	SAMD00132017	2013-07-01	Illumina MiSeq	Greenland	North America	Greenland:Morris Jesup Glacier	SAMD00132017	cryoconite hole	SAMD00132017	77.8878	-71.1392	Arctic
PRJEB14999Sample87	ERR1553679	PRJEB14999	14236	969	SAMEA4360848	2014	Illumina MiSeq	Greenland	North America	Southwest Greenland ice sheet	SAMEA4360848	cryoconite hole	SAMEA4360848	67.0666	-49.3833	Arctic
PRJEB14999Sample122	ERR1553654	PRJEB14999	17854	992	SAMEA4360823	2014	Illumina MiSeq	Greenland	North America	Southwest Greenland ice sheet	SAMEA4360823	cryoconite hole	SAMEA4360823	67.0666	-49.3833	Arctic
PRJEB14999Sample78	ERR1553691	PRJEB14999	20403	1212	SAMEA4360860	2014	Illumina MiSeq	Greenland	North America	Southwest Greenland ice sheet	SAMEA4360860	cryoconite hole	SAMEA4360860	67.0666	-49.3833	Arctic
PRJEB14999Sample75	ERR1553675	PRJEB14999	19645	1145	SAMEA4360844	2014	Illumina MiSeq	Greenland	North America	Southwest Greenland ice sheet	SAMEA4360844	cryoconite hole	SAMEA4360844	67.0666	-49.3833	Arctic
PRJEB14999Sample113	ERR1553690	PRJEB14999	21322	1224	SAMEA4360859	2014	Illumina MiSeq	Greenland	North America	Southwest Greenland ice sheet	SAMEA4360859	cryoconite hole	SAMEA4360859	67.0666	-49.3833	Arctic
PRJEB14999Sample106	ERR1553651	PRJEB14999	17532	986	SAMEA4360820	2014	Illumina MiSeq	Greenland	North America	Southwest Greenland ice sheet	SAMEA4360820	cryoconite hole	SAMEA4360820	67.0666	-49.3833	Arctic
PRJEB14999Sample52	ERR1553659	PRJEB14999	22614	1300	SAMEA4360828	2014	Illumina MiSeq	Greenland	North America	Southwest Greenland ice sheet	SAMEA4360828	cryoconite hole	SAMEA4360828	67.0666	-49.3833	Arctic
PRJEB14999Sample45	ERR1553693	PRJEB14999	19347	1099	SAMEA4360862	2014	Illumina MiSeq	Greenland	North America	Southwest Greenland ice sheet	SAMEA4360862	cryoconite hole	SAMEA4360862	67.0666	-49.3833	Arctic
PRJEB14999Sample49	ERR1553708	PRJEB14999	21838	1194	SAMEA4360877	2014	Illumina MiSeq	Greenland	North America	Southwest Greenland ice sheet	SAMEA4360877	cryoconite hole	SAMEA4360877	67.0666	-49.3833	Arctic
PRJEB14999Sample81	ERR1553650	PRJEB14999	20159	1046	SAMEA4360819	2014	Illumina MiSeq	Greenland	North America	Southwest Greenland ice sheet	SAMEA4360819	cryoconite hole	SAMEA4360819	67.0666	-49.3833	Arctic
PRJEB14999Sample24	ERR1553686	PRJEB14999	18295	974	SAMEA4360855	2014	Illumina MiSeq	Greenland	North America	Southwest Greenland ice sheet	SAMEA4360855	cryoconite hole	SAMEA4360855	67.0666	-49.3833	Arctic
PRJEB14999Sample74	ERR1553672	PRJEB14999	21571	1173	SAMEA4360841	2014	Illumina MiSeq	Greenland	North America	Southwest Greenland ice sheet	SAMEA4360841	cryoconite hole	SAMEA4360841	67.0666	-49.3833	Arctic
PRJEB14999Sample36	ERR1553660	PRJEB14999	23479	1202	SAMEA4360829	2014	Illumina MiSeq	Greenland	North America	Southwest Greenland ice sheet	SAMEA4360829	cryoconite hole	SAMEA4360829	67.0666	-49.3833	Arctic
PRJEB14999Sample2	ERR1553670	PRJEB14999	18152	1017	SAMEA4360839	2014	Illumina MiSeq	Greenland	North America	Southwest Greenland ice sheet	SAMEA4360839	cryoconite hole	SAMEA4360839	67.0666	-49.3833	Arctic
PRJEB14999Sample103	ERR1553755	PRJEB14999	26740	1436	SAMEA4360924	2014	Illumina MiSeq	Greenland	North America	Southwest Greenland ice sheet	SAMEA4360924	cryoconite hole	SAMEA4360924	67.0666	-49.3833	Arctic
PRJEB14999Sample13	ERR1553704	PRJEB14999	20694	1071	SAMEA4360873	2014	Illumina MiSeq	Greenland	North America	Southwest Greenland ice sheet	SAMEA4360873	cryoconite hole	SAMEA4360873	67.0666	-49.3833	Arctic
PRJEB14999Sample92	ERR1553657	PRJEB14999	20876	997	SAMEA4360826	2014	Illumina MiSeq	Greenland	North America	Southwest Greenland ice sheet	SAMEA4360826	cryoconite hole	SAMEA4360826	67.0666	-49.3833	Arctic
PRJEB14999Sample97	ERR1553683	PRJEB14999	24615	1157	SAMEA4360852	2014	Illumina MiSeq	Greenland	North America	Southwest Greenland ice sheet	SAMEA4360852	cryoconite hole	SAMEA4360852	67.0666	-49.3833	Arctic
PRJEB14999Sample51	ERR1553696	PRJEB14999	22873	1114	SAMEA4360865	2014	Illumina MiSeq	Greenland	North America	Southwest Greenland ice sheet	SAMEA4360865	cryoconite hole	SAMEA4360865	67.0666	-49.3833	Arctic
PRJEB14999Sample20	ERR1553710	PRJEB14999	25794	1130	SAMEA4360879	2014	Illumina MiSeq	Greenland	North America	Southwest Greenland ice sheet	SAMEA4360879	cryoconite hole	SAMEA4360879	67.0666	-49.3833	Arctic
PRJEB14999Sample50	ERR1553688	PRJEB14999	29210	1246	SAMEA4360857	2014	Illumina MiSeq	Greenland	North America	Southwest Greenland ice sheet	SAMEA4360857	cryoconite hole	SAMEA4360857	67.0666	-49.3833	Arctic
PRJNA318626Sample1	SRR3396494	PRJNA318626	6717	313	SAMN04851316	2014-06-19	Illumina MiSeq	Greenland	Greenland	Greenland	PRJNA318626	cryoconite hole	SAMN04851316	67.0472	-49.23	Arctic
PRJNA318626Sample100	SRR3396563	PRJNA318626	7018	346	SAMN04851327	2014-07-10	Illumina MiSeq	Greenland	North America	Greenland: S6	SAMN04851327	cryoconite hole	SAMN04851327	67.0457	-49.2383	Arctic
PRJNA318626Sample37	SRR3396499	PRJNA318626	13873	530	SAMN04851320	2014-06-26	Illumina MiSeq	Greenland	North America	Greenland: S6	SAMN04851320	cryoconite hole	SAMN04851320	67.0472	-49.23	Arctic
f337	SRR11822848	PRJNA633749	39182	1820	SAMN14970324	2018-06-01	Illumina HiSeq 2000	India	Asia	India	SAMN14970324	cryoconite hole	SAMN14970324	32.7635	77.3352	Tibetan Plateau
PRJNA997912Sample31	SRR25396488	PRJNA997912	5860	1507	SAMN36692215	2020	Illumina MiSeq	Russia	Europe	Russia: Central Caucasus	SAMN36692215	cryoconite hole	SAMN36692215	43.1908	42.6458	Other alpine regions
PRJNA997912Sample74	SRR25396485	PRJNA997912	7307	1818	SAMN36692215	2020	Illumina MiSeq	Russia	Europe	Russia: Central Caucasus	SAMN36692215	cryoconite hole	SAMN36692215	43.1908	42.6458	Other alpine regions
PRJNA997912Sample15	SRR25396482	PRJNA997912	6409	1587	SAMN36692216	2020	Illumina MiSeq	Russia	Europe	Russia: Central Caucasus	SAMN36692216	cryoconite hole	SAMN36692216	43.1908	42.6458	Other alpine regions
PRJNA997912Sample47	SRR25396465	PRJNA997912	7426	1032	SAMN36692221	2020	Illumina MiSeq	Russia	Europe	Russia: Central Caucasus	SAMN36692221	cryoconite hole	SAMN36692221	43.305	42.4639	Other alpine regions
PRJNA997912Sample29	SRR25396474	PRJNA997912	7973	1004	SAMN36692219	2020	Illumina MiSeq	Russia	Europe	Russia: Central Caucasus	SAMN36692219	cryoconite hole	SAMN36692219	43.305	42.4639	Other alpine regions
PRJNA997912Sample23	SRR25396471	PRJNA997912	9276	1107	SAMN36692219	2020	Illumina MiSeq	Russia	Europe	Russia: Central Caucasus	SAMN36692219	cryoconite hole	SAMN36692219	43.305	42.4639	Other alpine regions
PRJNA997912Sample51	SRR25396441	PRJNA997912	8421	980	SAMN36692221	2020	Illumina MiSeq	Russia	Europe	Russia: Central Caucasus	SAMN36692221	cryoconite hole	SAMN36692221	43.305	42.4639	Other alpine regions
PRJNA997912Sample73	SRR25396464	PRJNA997912	8628	985	SAMN36692221	2020	Illumina MiSeq	Russia	Europe	Russia: Central Caucasus	SAMN36692221	cryoconite hole	SAMN36692221	43.305	42.4639	Other alpine regions
PRJNA997912Sample18	SRR25396472	PRJNA997912	10839	1182	SAMN36692219	2020	Illumina MiSeq	Russia	Europe	Russia: Central Caucasus	SAMN36692219	cryoconite hole	SAMN36692219	43.305	42.4639	Other alpine regions
PRJNA997912Sample40	SRR25396475	PRJNA997912	9554	1025	SAMN36692219	2020	Illumina MiSeq	Russia	Europe	Russia: Central Caucasus	SAMN36692219	cryoconite hole	SAMN36692219	43.305	42.4639	Other alpine regions
PRJNA997912Sample67	SRR25396469	PRJNA997912	9184	940	SAMN36692220	2020	Illumina MiSeq	Russia	Europe	Russia: Central Caucasus	SAMN36692220	cryoconite hole	SAMN36692220	43.305	42.4639	Other alpine regions
PRJNA997912Sample59	SRR25396470	PRJNA997912	12439	1063	SAMN36692220	2020	Illumina MiSeq	Russia	Europe	Russia: Central Caucasus	SAMN36692220	cryoconite hole	SAMN36692220	43.305	42.4639	Other alpine regions
PRJNA997912Sample6	SRR25396478	PRJNA997912	5920	1439	SAMN36692218	2020	Illumina MiSeq	Russia	Europe	Russia: Central Caucasus	SAMN36692218	cryoconite hole	SAMN36692218	43.3222	42.7881	Other alpine regions
PRJNA997912Sample65	SRR25396479	PRJNA997912	6819	1563	SAMN36692218	2020	Illumina MiSeq	Russia	Europe	Russia: Central Caucasus	SAMN36692218	cryoconite hole	SAMN36692218	43.3222	42.7881	Other alpine regions
PRJNA997912Sample8	SRR25396502	PRJNA997912	6035	931	SAMN36692214	2020	Illumina MiSeq	Russia	Europe	Russia: Polar Ural	SAMN36692214	cryoconite hole	SAMN36692214	67.5756	66.0333	Other alpine regions
PRJNA997912Sample76	SRR25396498	PRJNA997912	5949	857	SAMN36692214	2020	Illumina MiSeq	Russia	Europe	Russia: Polar Ural	SAMN36692214	cryoconite hole	SAMN36692214	67.5756	66.0333	Other alpine regions
PRJNA997912Sample19	SRR25396501	PRJNA997912	8103	1010	SAMN36692214	2020	Illumina MiSeq	Russia	Europe	Russia: Polar Ural	SAMN36692214	cryoconite hole	SAMN36692214	67.5756	66.0333	Other alpine regions
PRJNA997912Sample36	SRR25396491	PRJNA997912	6645	776	SAMN36692212	2020	Illumina MiSeq	Russia	Europe	Russia: Polar Ural	SAMN36692212	cryoconite hole	SAMN36692212	67.5756	66.0333	Other alpine regions
PRJNA997912Sample62	SRR25396497	PRJNA997912	7374	816	SAMN36692213	2020	Illumina MiSeq	Russia	Europe	Russia: Polar Ural	SAMN36692213	cryoconite hole	SAMN36692213	67.5756	66.0333	Other alpine regions
PRJNA997912Sample68	SRR25396493	PRJNA997912	7322	808	SAMN36692212	2020	Illumina MiSeq	Russia	Europe	Russia: Polar Ural	SAMN36692212	cryoconite hole	SAMN36692212	67.5756	66.0333	Other alpine regions
PRJNA997912Sample21	SRR25396499	PRJNA997912	8997	1065	SAMN36692214	2020	Illumina MiSeq	Russia	Europe	Russia: Polar Ural	SAMN36692214	cryoconite hole	SAMN36692214	67.5756	66.0333	Other alpine regions
PRJNA997912Sample61	SRR25396494	PRJNA997912	7675	911	SAMN36692213	2020	Illumina MiSeq	Russia	Europe	Russia: Polar Ural	SAMN36692213	cryoconite hole	SAMN36692213	67.5756	66.0333	Other alpine regions
PRJNA997912Sample35	SRR25396492	PRJNA997912	7356	781	SAMN36692212	2020	Illumina MiSeq	Russia	Europe	Russia: Polar Ural	SAMN36692212	cryoconite hole	SAMN36692212	67.5756	66.0333	Other alpine regions
PRJNA997912Sample75	SRR25396490	PRJNA997912	7685	819	SAMN36692212	2020	Illumina MiSeq	Russia	Europe	Russia: Polar Ural	SAMN36692212	cryoconite hole	SAMN36692212	67.5756	66.0333	Other alpine regions
PRJNA997912Sample39	SRR25396506	PRJNA997912	7096	902	SAMN36692210	2020	Illumina MiSeq	Russia	Europe	Russia: Severnaya Zemlya	SAMN36692210	cryoconite hole	SAMN36692210	79.0953	101.723	Other alpine regions
PRJNA997912Sample71	SRR25396514	PRJNA997912	8387	811	SAMN36692207	2020	Illumina MiSeq	Russia	Europe	Russia: Severnaya Zemlya	SAMN36692207	cryoconite hole	SAMN36692207	79.0961	101.857	Other alpine regions
PRJNA997912Sample27	SRR25396473	PRJNA997912	6593	802	SAMN36692208	2020	Illumina MiSeq	Russia	Europe	Russia: Severnaya Zemlya	SAMN36692208	cryoconite hole	SAMN36692208	79.0978	101.858	Other alpine regions
PRJNA997912Sample14	SRR25396440	PRJNA997912	8072	936	SAMN36692208	2020	Illumina MiSeq	Russia	Europe	Russia: Severnaya Zemlya	SAMN36692208	cryoconite hole	SAMN36692208	79.0978	101.858	Other alpine regions
PRJNA997912Sample49	SRR25396513	PRJNA997912	7882	1044	SAMN36692211	2020	Illumina MiSeq	Russia	Europe	Russia: Severnaya Zemlya	SAMN36692211	cryoconite hole	SAMN36692211	79.1053	101.856	Other alpine regions
PRJNA997912Sample10	SRR25396510	PRJNA997912	8965	1076	SAMN36692211	2020	Illumina MiSeq	Russia	Europe	Russia: Severnaya Zemlya	SAMN36692211	cryoconite hole	SAMN36692211	79.1053	101.856	Other alpine regions
PRJNA997912Sample1	SRR25396512	PRJNA997912	9052	1050	SAMN36692211	2020	Illumina MiSeq	Russia	Europe	Russia: Severnaya Zemlya	SAMN36692211	cryoconite hole	SAMN36692211	79.1053	101.856	Other alpine regions
PRJNA997912Sample28	SRR25396511	PRJNA997912	9158	1078	SAMN36692211	2020	Illumina MiSeq	Russia	Europe	Russia: Severnaya Zemlya	SAMN36692211	cryoconite hole	SAMN36692211	79.1053	101.856	Other alpine regions
PRJNA997912Sample7	SRR25396505	PRJNA997912	5654	632	SAMN36692209	2020	Illumina MiSeq	Russia	Europe	Russia: Severnaya Zemlya	SAMN36692209	cryoconite hole	SAMN36692209	79.1183	102.154	Other alpine regions
PRJNA997912Sample57	SRR25396443	PRJNA997912	6604	690	SAMN36692209	2020	Illumina MiSeq	Russia	Europe	Russia: Severnaya Zemlya	SAMN36692209	cryoconite hole	SAMN36692209	79.1183	102.154	Other alpine regions
PRJDB7285Sample9	DRR147519	PRJDB7285	20889	1104	SAMD00134303	2016-07-01	Illumina MiSeq	Svalbard	Europe	Svalbard:Austre Broggerbreen\, NyAlesund	SAMD00134303	cryoconite hole	SAMD00134303	78.9016	11.8193	Other alpine regions
f895	SRR27784654	PRJNA1071093	12994	1272	SAMN39671700	2017-01-01	Illumina MiSeq	uncalculated	uncalculated	Antarctica: Taylor Valley	SAMN39671700	cryoconite hole	SAMN39671700	-77.6241	163.06	Antarctic
f897	SRR27784656	PRJNA1071093	16824	1287	SAMN39671698	2017-01-01	Illumina MiSeq	uncalculated	uncalculated	Antarctica: Taylor Valley	SAMN39671698	cryoconite hole	SAMN39671698	-77.6241	163.06	Antarctic
f872	SRR27784631	PRJNA1071093	21896	1169	SAMN39671619	2018-01-01	Illumina MiSeq	uncalculated	uncalculated	Antarctica: Taylor Valley	SAMN39671619	cryoconite hole	SAMN39671619	-77.6101	162.955	Antarctic
f869	SRR27784628	PRJNA1071093	26443	1117	SAMN39671622	2018-01-01	Illumina MiSeq	uncalculated	uncalculated	Antarctica: Taylor Valley	SAMN39671622	cryoconite hole	SAMN39671622	-77.6101	162.955	Antarctic
f794	SRR27784553	PRJNA1071093	20595	1005	SAMN39671690	2019-01-01	Illumina MiSeq	uncalculated	uncalculated	Antarctica: Taylor Valley	SAMN39671690	cryoconite hole	SAMN39671690	-77.6101	162.955	Antarctic
f884	SRR27784643	PRJNA1071093	23275	1027	SAMN39671608	2018-01-01	Illumina MiSeq	uncalculated	uncalculated	Antarctica: Taylor Valley	SAMN39671608	cryoconite hole	SAMN39671608	-77.6101	162.955	Antarctic
f868	SRR27784627	PRJNA1071093	22257	1095	SAMN39671623	2019-01-01	Illumina MiSeq	uncalculated	uncalculated	Antarctica: Taylor Valley	SAMN39671623	cryoconite hole	SAMN39671623	-77.6101	162.955	Antarctic
f846	SRR27784605	PRJNA1071093	18113	712	SAMN39671672	2018-01-01	Illumina MiSeq	uncalculated	uncalculated	Antarctica: Taylor Valley	SAMN39671672	cryoconite hole	SAMN39671672	-77.6101	162.955	Antarctic
f797	SRR27784556	PRJNA1071093	13956	1349	SAMN39671687	2018-01-01	Illumina MiSeq	uncalculated	uncalculated	Antarctica: Taylor Valley	SAMN39671687	cryoconite hole	SAMN39671687	-77.6101	162.955	Antarctic
f813	SRR27784572	PRJNA1071093	12038	909	SAMN39671658	2018-01-01	Illumina MiSeq	uncalculated	uncalculated	Antarctica: Taylor Valley	SAMN39671658	cryoconite hole	SAMN39671658	-77.6101	162.955	Antarctic
f901	SRR27784660	PRJNA1071093	14415	1067	SAMN39671694	2018-01-01	Illumina MiSeq	uncalculated	uncalculated	Antarctica: Taylor Valley	SAMN39671694	cryoconite hole	SAMN39671694	-77.6101	162.955	Antarctic
f885	SRR27784644	PRJNA1071093	16356	1261	SAMN39671607	2018-01-01	Illumina MiSeq	uncalculated	uncalculated	Antarctica: Taylor Valley	SAMN39671607	cryoconite hole	SAMN39671607	-77.6101	162.955	Antarctic
f847	SRR27784606	PRJNA1071093	17817	1402	SAMN39671671	2018-01-01	Illumina MiSeq	uncalculated	uncalculated	Antarctica: Taylor Valley	SAMN39671671	cryoconite hole	SAMN39671671	-77.6101	162.955	Antarctic
f810	SRR27784569	PRJNA1071093	24366	1328	SAMN39671661	2018-01-01	Illumina MiSeq	uncalculated	uncalculated	Antarctica: Taylor Valley	SAMN39671661	cryoconite hole	SAMN39671661	-77.6101	162.955	Antarctic
f841	SRR27784600	PRJNA1071093	19875	1356	SAMN39671676	2019-01-01	Illumina MiSeq	uncalculated	uncalculated	Antarctica: Taylor Valley	SAMN39671676	cryoconite hole	SAMN39671676	-77.6101	162.955	Antarctic
f798	SRR27784557	PRJNA1071093	26340	1421	SAMN39671686	2018-01-01	Illumina MiSeq	uncalculated	uncalculated	Antarctica: Taylor Valley	SAMN39671686	cryoconite hole	SAMN39671686	-77.6101	162.955	Antarctic
f799	SRR27784558	PRJNA1071093	20274	917	SAMN39671685	2018-01-01	Illumina MiSeq	uncalculated	uncalculated	Antarctica: Taylor Valley	SAMN39671685	cryoconite hole	SAMN39671685	-77.6101	162.955	Antarctic
f881	SRR27784640	PRJNA1071093	11870	562	SAMN39671611	2018-01-01	Illumina MiSeq	uncalculated	uncalculated	Antarctica: Taylor Valley	SAMN39671611	cryoconite hole	SAMN39671611	-77.6101	162.955	Antarctic
f886	SRR27784645	PRJNA1071093	23687	1089	SAMN39671606	2018-01-01	Illumina MiSeq	uncalculated	uncalculated	Antarctica: Taylor Valley	SAMN39671606	cryoconite hole	SAMN39671606	-77.6101	162.955	Antarctic
f824	SRR27784583	PRJNA1071093	23852	1227	SAMN39671648	2018-01-01	Illumina MiSeq	uncalculated	uncalculated	Antarctica: Taylor Valley	SAMN39671648	cryoconite hole	SAMN39671648	-77.6101	162.955	Antarctic
f839	SRR27784598	PRJNA1071093	27043	1155	SAMN39671634	2018-01-01	Illumina MiSeq	uncalculated	uncalculated	Antarctica: Taylor Valley	SAMN39671634	cryoconite hole	SAMN39671634	-77.6101	162.955	Antarctic
f855	SRR27784614	PRJNA1071093	27457	1238	SAMN39671601	2019-01-01	Illumina MiSeq	uncalculated	uncalculated	Antarctica: Taylor Valley	SAMN39671601	cryoconite hole	SAMN39671601	-77.6101	162.955	Antarctic
f827	SRR27784586	PRJNA1071093	18639	848	SAMN39671645	2019-01-01	Illumina MiSeq	uncalculated	uncalculated	Antarctica: Taylor Valley	SAMN39671645	cryoconite hole	SAMN39671645	-77.6101	162.955	Antarctic
f830	SRR27784589	PRJNA1071093	30349	1559	SAMN39671643	2019-01-01	Illumina MiSeq	uncalculated	uncalculated	Antarctica: Taylor Valley	SAMN39671643	cryoconite hole	SAMN39671643	-77.6101	162.955	Antarctic
f809	SRR27784568	PRJNA1071093	22878	811	SAMN39671662	2018-01-01	Illumina MiSeq	uncalculated	uncalculated	Antarctica: Taylor Valley	SAMN39671662	cryoconite hole	SAMN39671662	-77.6101	162.955	Antarctic
f880	SRR27784639	PRJNA1071093	25519	958	SAMN39671612	2019-01-01	Illumina MiSeq	uncalculated	uncalculated	Antarctica: Taylor Valley	SAMN39671612	cryoconite hole	SAMN39671612	-77.6101	162.955	Antarctic
f875	SRR27784634	PRJNA1071093	25262	1053	SAMN39671616	2019-01-01	Illumina MiSeq	uncalculated	uncalculated	Antarctica: Taylor Valley	SAMN39671616	cryoconite hole	SAMN39671616	-77.6101	162.955	Antarctic
f834	SRR27784593	PRJNA1071093	22421	807	SAMN39671639	2018-01-01	Illumina MiSeq	uncalculated	uncalculated	Antarctica: Taylor Valley	SAMN39671639	cryoconite hole	SAMN39671639	-77.6101	162.955	Antarctic
f822	SRR27784581	PRJNA1071093	26101	964	SAMN39671650	2018-01-01	Illumina MiSeq	uncalculated	uncalculated	Antarctica: Taylor Valley	SAMN39671650	cryoconite hole	SAMN39671650	-77.6101	162.955	Antarctic
f791	SRR27784550	PRJNA1071093	24778	792	SAMN39671693	2018-01-01	Illumina MiSeq	uncalculated	uncalculated	Antarctica: Taylor Valley	SAMN39671693	cryoconite hole	SAMN39671693	-77.6101	162.955	Antarctic
f792	SRR27784551	PRJNA1071093	24381	1196	SAMN39671692	2019-01-01	Illumina MiSeq	uncalculated	uncalculated	Antarctica: Taylor Valley	SAMN39671692	cryoconite hole	SAMN39671692	-77.6101	162.955	Antarctic
f793	SRR27784552	PRJNA1071093	36811	1203	SAMN39671691	2019-01-01	Illumina MiSeq	uncalculated	uncalculated	Antarctica: Taylor Valley	SAMN39671691	cryoconite hole	SAMN39671691	-77.6101	162.955	Antarctic
f795	SRR27784554	PRJNA1071093	29396	711	SAMN39671689	2019-01-01	Illumina MiSeq	uncalculated	uncalculated	Antarctica: Taylor Valley	SAMN39671689	cryoconite hole	SAMN39671689	-77.6101	162.955	Antarctic
f796	SRR27784555	PRJNA1071093	29383	1175	SAMN39671688	2019-01-01	Illumina MiSeq	uncalculated	uncalculated	Antarctica: Taylor Valley	SAMN39671688	cryoconite hole	SAMN39671688	-77.6101	162.955	Antarctic
f800	SRR27784559	PRJNA1071093	28004	807	SAMN39671684	2018-01-01	Illumina MiSeq	uncalculated	uncalculated	Antarctica: Taylor Valley	SAMN39671684	cryoconite hole	SAMN39671684	-77.6101	162.955	Antarctic
f801	SRR27784560	PRJNA1071093	26796	319	SAMN39671603	2019-01-01	Illumina MiSeq	uncalculated	uncalculated	Antarctica: Taylor Valley	SAMN39671603	cryoconite hole	SAMN39671603	-77.6101	162.955	Antarctic
f803	SRR27784562	PRJNA1071093	21986	734	SAMN39671682	2019-01-01	Illumina MiSeq	uncalculated	uncalculated	Antarctica: Taylor Valley	SAMN39671682	cryoconite hole	SAMN39671682	-77.6101	162.955	Antarctic
f804	SRR27784563	PRJNA1071093	35183	1611	SAMN39671681	2019-01-01	Illumina MiSeq	uncalculated	uncalculated	Antarctica: Taylor Valley	SAMN39671681	cryoconite hole	SAMN39671681	-77.6101	162.955	Antarctic
f805	SRR27784564	PRJNA1071093	43571	1338	SAMN39671680	2019-01-01	Illumina MiSeq	uncalculated	uncalculated	Antarctica: Taylor Valley	SAMN39671680	cryoconite hole	SAMN39671680	-77.6101	162.955	Antarctic
f806	SRR27784565	PRJNA1071093	24854	925	SAMN39671679	2019-01-01	Illumina MiSeq	uncalculated	uncalculated	Antarctica: Taylor Valley	SAMN39671679	cryoconite hole	SAMN39671679	-77.6101	162.955	Antarctic
f807	SRR27784566	PRJNA1071093	36912	1140	SAMN39671678	2019-01-01	Illumina MiSeq	uncalculated	uncalculated	Antarctica: Taylor Valley	SAMN39671678	cryoconite hole	SAMN39671678	-77.6101	162.955	Antarctic
f808	SRR27784567	PRJNA1071093	39416	1062	SAMN39671677	2019-01-01	Illumina MiSeq	uncalculated	uncalculated	Antarctica: Taylor Valley	SAMN39671677	cryoconite hole	SAMN39671677	-77.6101	162.955	Antarctic
f811	SRR27784570	PRJNA1071093	30564	1021	SAMN39671660	2018-01-01	Illumina MiSeq	uncalculated	uncalculated	Antarctica: Taylor Valley	SAMN39671660	cryoconite hole	SAMN39671660	-77.6101	162.955	Antarctic
f814	SRR27784573	PRJNA1071093	28424	1095	SAMN39671657	2019-01-01	Illumina MiSeq	uncalculated	uncalculated	Antarctica: Taylor Valley	SAMN39671657	cryoconite hole	SAMN39671657	-77.6101	162.955	Antarctic
f815	SRR27784574	PRJNA1071093	46940	1525	SAMN39671656	2019-01-01	Illumina MiSeq	uncalculated	uncalculated	Antarctica: Taylor Valley	SAMN39671656	cryoconite hole	SAMN39671656	-77.6101	162.955	Antarctic
f816	SRR27784575	PRJNA1071093	24115	831	SAMN39671655	2019-01-01	Illumina MiSeq	uncalculated	uncalculated	Antarctica: Taylor Valley	SAMN39671655	cryoconite hole	SAMN39671655	-77.6101	162.955	Antarctic
f817	SRR27784576	PRJNA1071093	13472	241	SAMN39671654	2019-01-01	Illumina MiSeq	uncalculated	uncalculated	Antarctica: Taylor Valley	SAMN39671654	cryoconite hole	SAMN39671654	-77.6101	162.955	Antarctic
f819	SRR27784578	PRJNA1071093	67487	999	SAMN39671653	2019-01-01	Illumina MiSeq	uncalculated	uncalculated	Antarctica: Taylor Valley	SAMN39671653	cryoconite hole	SAMN39671653	-77.6101	162.955	Antarctic
f820	SRR27784579	PRJNA1071093	17744	438	SAMN39671652	2019-01-01	Illumina MiSeq	uncalculated	uncalculated	Antarctica: Taylor Valley	SAMN39671652	cryoconite hole	SAMN39671652	-77.6101	162.955	Antarctic
f823	SRR27784582	PRJNA1071093	31316	862	SAMN39671649	2018-01-01	Illumina MiSeq	uncalculated	uncalculated	Antarctica: Taylor Valley	SAMN39671649	cryoconite hole	SAMN39671649	-77.6101	162.955	Antarctic
f828	SRR27784587	PRJNA1071093	34974	1102	SAMN39671644	2019-01-01	Illumina MiSeq	uncalculated	uncalculated	Antarctica: Taylor Valley	SAMN39671644	cryoconite hole	SAMN39671644	-77.6101	162.955	Antarctic
f829	SRR27784588	PRJNA1071093	31123	1159	SAMN39671599	2019-01-01	Illumina MiSeq	uncalculated	uncalculated	Antarctica: Taylor Valley	SAMN39671599	cryoconite hole	SAMN39671599	-77.6101	162.955	Antarctic
f831	SRR27784590	PRJNA1071093	32950	748	SAMN39671642	2019-01-01	Illumina MiSeq	uncalculated	uncalculated	Antarctica: Taylor Valley	SAMN39671642	cryoconite hole	SAMN39671642	-77.6101	162.955	Antarctic
f832	SRR27784591	PRJNA1071093	56886	1319	SAMN39671641	2019-01-01	Illumina MiSeq	uncalculated	uncalculated	Antarctica: Taylor Valley	SAMN39671641	cryoconite hole	SAMN39671641	-77.6101	162.955	Antarctic
f835	SRR27784594	PRJNA1071093	24513	797	SAMN39671638	2018-01-01	Illumina MiSeq	uncalculated	uncalculated	Antarctica: Taylor Valley	SAMN39671638	cryoconite hole	SAMN39671638	-77.6101	162.955	Antarctic
f838	SRR27784597	PRJNA1071093	28838	928	SAMN39671635	2018-01-01	Illumina MiSeq	uncalculated	uncalculated	Antarctica: Taylor Valley	SAMN39671635	cryoconite hole	SAMN39671635	-77.6101	162.955	Antarctic
f842	SRR27784601	PRJNA1071093	34496	1183	SAMN39671675	2019-01-01	Illumina MiSeq	uncalculated	uncalculated	Antarctica: Taylor Valley	SAMN39671675	cryoconite hole	SAMN39671675	-77.6101	162.955	Antarctic
f843	SRR27784602	PRJNA1071093	27027	1223	SAMN39671674	2019-01-01	Illumina MiSeq	uncalculated	uncalculated	Antarctica: Taylor Valley	SAMN39671674	cryoconite hole	SAMN39671674	-77.6101	162.955	Antarctic
f844	SRR27784603	PRJNA1071093	20600	785	SAMN39671602	2019-01-01	Illumina MiSeq	uncalculated	uncalculated	Antarctica: Taylor Valley	SAMN39671602	cryoconite hole	SAMN39671602	-77.6101	162.955	Antarctic
f845	SRR27784604	PRJNA1071093	32787	905	SAMN39671673	2019-01-01	Illumina MiSeq	uncalculated	uncalculated	Antarctica: Taylor Valley	SAMN39671673	cryoconite hole	SAMN39671673	-77.6101	162.955	Antarctic
f848	SRR27784607	PRJNA1071093	24400	781	SAMN39671670	2018-01-01	Illumina MiSeq	uncalculated	uncalculated	Antarctica: Taylor Valley	SAMN39671670	cryoconite hole	SAMN39671670	-77.6101	162.955	Antarctic
f851	SRR27784610	PRJNA1071093	36002	1397	SAMN39671667	2019-01-01	Illumina MiSeq	uncalculated	uncalculated	Antarctica: Taylor Valley	SAMN39671667	cryoconite hole	SAMN39671667	-77.6101	162.955	Antarctic
f852	SRR27784611	PRJNA1071093	52653	1366	SAMN39671666	2019-01-01	Illumina MiSeq	uncalculated	uncalculated	Antarctica: Taylor Valley	SAMN39671666	cryoconite hole	SAMN39671666	-77.6101	162.955	Antarctic
f853	SRR27784612	PRJNA1071093	28088	1091	SAMN39671665	2019-01-01	Illumina MiSeq	uncalculated	uncalculated	Antarctica: Taylor Valley	SAMN39671665	cryoconite hole	SAMN39671665	-77.6101	162.955	Antarctic
f854	SRR27784613	PRJNA1071093	40938	1062	SAMN39671664	2019-01-01	Illumina MiSeq	uncalculated	uncalculated	Antarctica: Taylor Valley	SAMN39671664	cryoconite hole	SAMN39671664	-77.6101	162.955	Antarctic
f856	SRR27784615	PRJNA1071093	40761	883	SAMN39671663	2019-01-01	Illumina MiSeq	uncalculated	uncalculated	Antarctica: Taylor Valley	SAMN39671663	cryoconite hole	SAMN39671663	-77.6101	162.955	Antarctic
f857	SRR27784616	PRJNA1071093	28449	633	SAMN39671633	2018-01-01	Illumina MiSeq	uncalculated	uncalculated	Antarctica: Taylor Valley	SAMN39671633	cryoconite hole	SAMN39671633	-77.6101	162.955	Antarctic
f859	SRR27784618	PRJNA1071093	23038	785	SAMN39671631	2018-01-01	Illumina MiSeq	uncalculated	uncalculated	Antarctica: Taylor Valley	SAMN39671631	cryoconite hole	SAMN39671631	-77.6101	162.955	Antarctic
f860	SRR27784619	PRJNA1071093	11146	169	SAMN39671630	2018-01-01	Illumina MiSeq	uncalculated	uncalculated	Antarctica: Taylor Valley	SAMN39671630	cryoconite hole	SAMN39671630	-77.6101	162.955	Antarctic
f862	SRR27784621	PRJNA1071093	38060	1297	SAMN39671628	2019-01-01	Illumina MiSeq	uncalculated	uncalculated	Antarctica: Taylor Valley	SAMN39671628	cryoconite hole	SAMN39671628	-77.6101	162.955	Antarctic
f863	SRR27784622	PRJNA1071093	33920	813	SAMN39671627	2019-01-01	Illumina MiSeq	uncalculated	uncalculated	Antarctica: Taylor Valley	SAMN39671627	cryoconite hole	SAMN39671627	-77.6101	162.955	Antarctic
f866	SRR27784625	PRJNA1071093	43082	1848	SAMN39671624	2019-01-01	Illumina MiSeq	uncalculated	uncalculated	Antarctica: Taylor Valley	SAMN39671624	cryoconite hole	SAMN39671624	-77.6101	162.955	Antarctic
f867	SRR27784626	PRJNA1071093	29261	961	SAMN39671597	2019-01-01	Illumina MiSeq	uncalculated	uncalculated	Antarctica: Taylor Valley	SAMN39671597	cryoconite hole	SAMN39671597	-77.6101	162.955	Antarctic
f873	SRR27784632	PRJNA1071093	34160	825	SAMN39671618	2019-01-01	Illumina MiSeq	uncalculated	uncalculated	Antarctica: Taylor Valley	SAMN39671618	cryoconite hole	SAMN39671618	-77.6101	162.955	Antarctic
f874	SRR27784633	PRJNA1071093	39813	1161	SAMN39671617	2019-01-01	Illumina MiSeq	uncalculated	uncalculated	Antarctica: Taylor Valley	SAMN39671617	cryoconite hole	SAMN39671617	-77.6101	162.955	Antarctic
f876	SRR27784635	PRJNA1071093	37440	886	SAMN39671615	2019-01-01	Illumina MiSeq	uncalculated	uncalculated	Antarctica: Taylor Valley	SAMN39671615	cryoconite hole	SAMN39671615	-77.6101	162.955	Antarctic
f877	SRR27784636	PRJNA1071093	35637	1159	SAMN39671614	2019-01-01	Illumina MiSeq	uncalculated	uncalculated	Antarctica: Taylor Valley	SAMN39671614	cryoconite hole	SAMN39671614	-77.6101	162.955	Antarctic
f878	SRR27784637	PRJNA1071093	41289	1370	SAMN39671596	2019-01-01	Illumina MiSeq	uncalculated	uncalculated	Antarctica: Taylor Valley	SAMN39671596	cryoconite hole	SAMN39671596	-77.6101	162.955	Antarctic
f882	SRR27784641	PRJNA1071093	11064	164	SAMN39671610	2018-01-01	Illumina MiSeq	uncalculated	uncalculated	Antarctica: Taylor Valley	SAMN39671610	cryoconite hole	SAMN39671610	-77.6101	162.955	Antarctic
f891	SRR27784650	PRJNA1071093	23256	545	SAMN39671605	2018-01-01	Illumina MiSeq	uncalculated	uncalculated	Antarctica: Taylor Valley	SAMN39671605	cryoconite hole	SAMN39671605	-77.6101	162.955	Antarctic
f898	SRR27784657	PRJNA1071093	24188	767	SAMN39671697	2018-01-01	Illumina MiSeq	uncalculated	uncalculated	Antarctica: Taylor Valley	SAMN39671697	cryoconite hole	SAMN39671697	-77.6101	162.955	Antarctic
f900	SRR27784659	PRJNA1071093	8800	250	SAMN39671695	2018-01-01	Illumina MiSeq	uncalculated	uncalculated	Antarctica: Taylor Valley	SAMN39671695	cryoconite hole	SAMN39671695	-77.6101	162.955	Antarctic
f902	SRR27784661	PRJNA1071093	38988	895	SAMN39671604	2019-01-01	Illumina MiSeq	uncalculated	uncalculated	Antarctica: Taylor Valley	SAMN39671604	cryoconite hole	SAMN39671604	-77.6101	162.955	Antarctic
f903	SRR27784662	PRJNA1071093	20631	481	SAMN39671595	2019-01-01	Illumina MiSeq	uncalculated	uncalculated	Antarctica: Taylor Valley	SAMN39671595	cryoconite hole	SAMN39671595	-77.6101	162.955	Antarctic
f904	SRR27784663	PRJNA1071093	28014	850	SAMN39671594	2019-01-01	Illumina MiSeq	uncalculated	uncalculated	Antarctica: Taylor Valley	SAMN39671594	cryoconite hole	SAMN39671594	-77.6101	162.955	Antarctic
f890	SRR27784649	PRJNA1071093	18427	1366	SAMN39671704	2016-11-01	Illumina MiSeq	uncalculated	uncalculated	Antarctica: Taylor Valley	SAMN39671704	cryoconite hole	SAMN39671704	-77.6092	162.929	Antarctic
f888	SRR27784647	PRJNA1071093	23317	826	SAMN39671706	2016-11-01	Illumina MiSeq	uncalculated	uncalculated	Antarctica: Taylor Valley	SAMN39671706	cryoconite hole	SAMN39671706	-77.6092	162.929	Antarctic
f894	SRR27784653	PRJNA1071093	18201	770	SAMN39671701	2017-01-01	Illumina MiSeq	uncalculated	uncalculated	Antarctica: Taylor Valley	SAMN39671701	cryoconite hole	SAMN39671701	-77.5987	163.309	Antarctic
f893	SRR27784652	PRJNA1071093	42433	1151	SAMN39671702	2017-01-01	Illumina MiSeq	uncalculated	uncalculated	Antarctica: Taylor Valley	SAMN39671702	cryoconite hole	SAMN39671702	-77.5987	163.309	Antarctic
PRJNA320505Sample2	SRR3476896	PRJNA320505	7628	602	SAMN04954880	2011-12/2012-01	Illumina MiSeq	uncalculated	uncalculated	Antarctica: Ecology Glacier	SAMN04954880	cryoconite hole	SAMN04954880	-62.16	-58.47	Antarctic
PRJNA480849Sample285	SRR17375819	PRJNA480849	9559	445	SAMN24469120	2016-11-01	Illumina MiSeq	uncalculated	uncalculated	Antarctica: Taylor Valley	SAMN24469120	cryoconite hole	SAMN24469120	-77.7424	162.114	Antarctic
PRJNA480849Sample98	SRR17375821	PRJNA480849	10558	403	SAMN24469118	2016-11-01	Illumina MiSeq	uncalculated	uncalculated	Antarctica: Taylor Valley	SAMN24469118	cryoconite hole	SAMN24469118	-77.7424	162.113	Antarctic
PRJNA480849Sample57	SRR17376057	PRJNA480849	10187	326	SAMN24469132	2016-11-01	Illumina MiSeq	uncalculated	uncalculated	Antarctica: Taylor Valley	SAMN24469132	cryoconite hole	SAMN24469132	-77.7421	-162.125	Antarctic
PRJNA480849Sample95	SRR17376058	PRJNA480849	8822	407	SAMN24469131	2016-11-01	Illumina MiSeq	uncalculated	uncalculated	Antarctica: Taylor Valley	SAMN24469131	cryoconite hole	SAMN24469131	-77.7421	162.125	Antarctic
PRJNA480849Sample183	SRR17376061	PRJNA480849	11736	314	SAMN24469129	2016-11-01	Illumina MiSeq	uncalculated	uncalculated	Antarctica: Taylor Valley	SAMN24469129	cryoconite hole	SAMN24469129	-77.7418	-162.124	Antarctic
PRJNA480849Sample252	SRR17376060	PRJNA480849	8892	414	SAMN24469130	2016-11-01	Illumina MiSeq	uncalculated	uncalculated	Antarctica: Taylor Valley	SAMN24469130	cryoconite hole	SAMN24469130	-77.7418	162.124	Antarctic
PRJNA480849Sample59	SRR17376056	PRJNA480849	7511	394	SAMN24469133	2016-11-01	Illumina MiSeq	uncalculated	uncalculated	Antarctica: Taylor Valley	SAMN24469133	cryoconite hole	SAMN24469133	-77.7418	162.125	Antarctic
PRJNA480849Sample250	SRR17375824	PRJNA480849	12058	551	SAMN24469115	2016-11-01	Illumina MiSeq	uncalculated	uncalculated	Antarctica: Taylor Valley	SAMN24469115	cryoconite hole	SAMN24469115	-77.7416	162.106	Antarctic
PRJNA480849Sample286	SRR17375823	PRJNA480849	12942	488	SAMN24469116	2016-11-01	Illumina MiSeq	uncalculated	uncalculated	Antarctica: Taylor Valley	SAMN24469116	cryoconite hole	SAMN24469116	-77.7416	162.106	Antarctic
PRJNA480849Sample345	SRR17375827	PRJNA480849	8995	384	SAMN24469112	2016-11-01	Illumina MiSeq	uncalculated	uncalculated	Antarctica: Taylor Valley	SAMN24469112	cryoconite hole	SAMN24469112	-77.7416	162.105	Antarctic
PRJNA480849Sample333	SRR17375826	PRJNA480849	9871	554	SAMN24469113	2016-11-01	Illumina MiSeq	uncalculated	uncalculated	Antarctica: Taylor Valley	SAMN24469113	cryoconite hole	SAMN24469113	-77.7414	162.106	Antarctic
PRJNA480849Sample244	SRR17376066	PRJNA480849	12616	449	SAMN24469124	2016-11-01	Illumina MiSeq	uncalculated	uncalculated	Antarctica: Taylor Valley	SAMN24469124	cryoconite hole	SAMN24469124	-77.7408	162.116	Antarctic
PRJNA480849Sample208	SRR17376067	PRJNA480849	10222	448	SAMN24469123	2016-11-01	Illumina MiSeq	uncalculated	uncalculated	Antarctica: Taylor Valley	SAMN24469123	cryoconite hole	SAMN24469123	-77.7408	162.116	Antarctic
PRJNA480849Sample192	SRR17376065	PRJNA480849	7705	481	SAMN24469125	2016-11-01	Illumina MiSeq	uncalculated	uncalculated	Antarctica: Taylor Valley	SAMN24469125	cryoconite hole	SAMN24469125	-77.7406	162.117	Antarctic
PRJNA480849Sample42	SRR17376063	PRJNA480849	10323	258	SAMN24469127	2016-11-01	Illumina MiSeq	uncalculated	uncalculated	Antarctica: Taylor Valley	SAMN24469127	cryoconite hole	SAMN24469127	-77.7406	-162.116	Antarctic
PRJNA480849Sample126	SRR17376064	PRJNA480849	5481	398	SAMN24469126	2016-11-01	Illumina MiSeq	uncalculated	uncalculated	Antarctica: Taylor Valley	SAMN24469126	cryoconite hole	SAMN24469126	-77.7406	162.117	Antarctic
PRJNA480849Sample224	SRR17376050	PRJNA480849	8329	286	SAMN24469139	2016-11-01	Illumina MiSeq	uncalculated	uncalculated	Antarctica: Taylor Valley	SAMN24469139	cryoconite hole	SAMN24469139	-77.7401	-162.127	Antarctic
PRJNA480849Sample24	SRR17376054	PRJNA480849	7978	357	SAMN24469135	2016-11-01	Illumina MiSeq	uncalculated	uncalculated	Antarctica: Taylor Valley	SAMN24469135	cryoconite hole	SAMN24469135	-77.7399	162.127	Antarctic
PRJNA480849Sample259	SRR17376052	PRJNA480849	8664	478	SAMN24469137	2016-11-01	Illumina MiSeq	uncalculated	uncalculated	Antarctica: Taylor Valley	SAMN24469137	cryoconite hole	SAMN24469137	-77.7398	162.126	Antarctic
PRJNA480849Sample190	SRR17376051	PRJNA480849	9480	389	SAMN24469138	2016-11-01	Illumina MiSeq	uncalculated	uncalculated	Antarctica: Taylor Valley	SAMN24469138	cryoconite hole	SAMN24469138	-77.7398	162.126	Antarctic
PRJNA480849Sample109	SRR17376147	PRJNA480849	10861	532	SAMN24469061	2016-11-01	Illumina MiSeq	uncalculated	uncalculated	Antarctica: Taylor Valley	SAMN24469061	cryoconite hole	SAMN24469061	-77.6208	162.991	Antarctic
PRJNA480849Sample159	SRR17376059	PRJNA480849	6025	591	SAMN24469059	2016-11-01	Illumina MiSeq	uncalculated	uncalculated	Antarctica: Taylor Valley	SAMN24469059	cryoconite hole	SAMN24469059	-77.6208	162.992	Antarctic
PRJNA480849Sample8	SRR17376136	PRJNA480849	10035	492	SAMN24469062	2016-11-01	Illumina MiSeq	uncalculated	uncalculated	Antarctica: Taylor Valley	SAMN24469062	cryoconite hole	SAMN24469062	-77.6208	162.991	Antarctic
PRJNA480849Sample245	SRR17375829	PRJNA480849	8620	538	SAMN24469057	2016-11-01	Illumina MiSeq	uncalculated	uncalculated	Antarctica: Taylor Valley	SAMN24469057	cryoconite hole	SAMN24469057	-77.6206	162.991	Antarctic
PRJNA480849Sample81	SRR17375900	PRJNA480849	5566	483	SAMN24469066	2016-11-01	Illumina MiSeq	uncalculated	uncalculated	Antarctica: Taylor Valley	SAMN24469066	cryoconite hole	SAMN24469066	-77.62	162.989	Antarctic
PRJNA480849Sample130	SRR17375911	PRJNA480849	6503	612	SAMN24469065	2016-11-01	Illumina MiSeq	uncalculated	uncalculated	Antarctica: Taylor Valley	SAMN24469065	cryoconite hole	SAMN24469065	-77.62	162.989	Antarctic
PRJNA480849Sample307	SRR17375994	PRJNA480849	8504	624	SAMN24469073	2016-11-01	Illumina MiSeq	uncalculated	uncalculated	Antarctica: Taylor Valley	SAMN24469073	cryoconite hole	SAMN24469073	-77.6198	163.001	Antarctic
PRJNA480849Sample199	SRR17376034	PRJNA480849	5585	581	SAMN24469064	2016-11-01	Illumina MiSeq	uncalculated	uncalculated	Antarctica: Taylor Valley	SAMN24469064	cryoconite hole	SAMN24469064	-77.6197	162.988	Antarctic
PRJNA480849Sample196	SRR17376005	PRJNA480849	8711	716	SAMN24469072	2016-11-01	Illumina MiSeq	uncalculated	uncalculated	Antarctica: Taylor Valley	SAMN24469072	cryoconite hole	SAMN24469072	-77.6197	163.001	Antarctic
PRJNA480849Sample299	SRR17375932	PRJNA480849	6403	622	SAMN24469056	2016-11-01	Illumina MiSeq	uncalculated	uncalculated	Antarctica: Taylor Valley	SAMN24469056	cryoconite hole	SAMN24469056	-77.6196	162.995	Antarctic
PRJNA480849Sample255	SRR17375966	PRJNA480849	13136	866	SAMN24469054	2016-11-01	Illumina MiSeq	uncalculated	uncalculated	Antarctica: Taylor Valley	SAMN24469054	cryoconite hole	SAMN24469054	-77.6195	162.996	Antarctic
PRJNA480849Sample217	SRR17376101	PRJNA480849	10901	496	SAMN24469076	2016-11-01	Illumina MiSeq	uncalculated	uncalculated	Antarctica: Taylor Valley	SAMN24469076	cryoconite hole	SAMN24469076	-77.6187	163.003	Antarctic
PRJNA480849Sample18	SRR17376090	PRJNA480849	6859	610	SAMN24469077	2016-11-01	Illumina MiSeq	uncalculated	uncalculated	Antarctica: Taylor Valley	SAMN24469077	cryoconite hole	SAMN24469077	-77.6185	163.003	Antarctic
PRJNA480849Sample322	SRR17375979	PRJNA480849	7467	680	SAMN24469078	2016-11-01	Illumina MiSeq	uncalculated	uncalculated	Antarctica: Taylor Valley	SAMN24469078	cryoconite hole	SAMN24469078	-77.6185	163.003	Antarctic
PRJNA480849Sample279	SRR17375942	PRJNA480849	5714	636	SAMN24469091	2016-11-01	Illumina MiSeq	uncalculated	uncalculated	Antarctica: Taylor Valley	SAMN24469091	cryoconite hole	SAMN24469091	-77.5714	163.287	Antarctic
PRJNA480849Sample76	SRR17375939	PRJNA480849	7950	847	SAMN24469094	2016-11-01	Illumina MiSeq	uncalculated	uncalculated	Antarctica: Taylor Valley	SAMN24469094	cryoconite hole	SAMN24469094	-77.5711	163.28	Antarctic
PRJNA480849Sample203	SRR17375940	PRJNA480849	8328	812	SAMN24469093	2016-11-01	Illumina MiSeq	uncalculated	uncalculated	Antarctica: Taylor Valley	SAMN24469093	cryoconite hole	SAMN24469093	-77.5711	163.28	Antarctic
PRJNA480849Sample34	SRR17375938	PRJNA480849	11443	869	SAMN24469095	2016-11-01	Illumina MiSeq	uncalculated	uncalculated	Antarctica: Taylor Valley	SAMN24469095	cryoconite hole	SAMN24469095	-77.571	163.279	Antarctic
PRJNA480849Sample141	SRR17375837	PRJNA480849	7332	731	SAMN24469103	2016-11-01	Illumina MiSeq	uncalculated	uncalculated	Antarctica: Taylor Valley	SAMN24469103	cryoconite hole	SAMN24469103	-77.5701	163.296	Antarctic
PRJNA480849Sample283	SRR17375930	PRJNA480849	9196	877	SAMN24469102	2016-11-01	Illumina MiSeq	uncalculated	uncalculated	Antarctica: Taylor Valley	SAMN24469102	cryoconite hole	SAMN24469102	-77.5701	163.296	Antarctic
PRJNA480849Sample311	SRR17375933	PRJNA480849	8449	761	SAMN24469100	2016-11-01	Illumina MiSeq	uncalculated	uncalculated	Antarctica: Taylor Valley	SAMN24469100	cryoconite hole	SAMN24469100	-77.5699	163.296	Antarctic
PRJNA480849Sample179	SRR17376081	PRJNA480849	9187	639	SAMN24469085	2016-11-01	Illumina MiSeq	uncalculated	uncalculated	Antarctica: Taylor Valley	SAMN24469085	cryoconite hole	SAMN24469085	-77.5696	163.288	Antarctic
PRJNA480849Sample177	SRR17375833	PRJNA480849	9498	674	SAMN24469107	2016-11-01	Illumina MiSeq	uncalculated	uncalculated	Antarctica: Taylor Valley	SAMN24469107	cryoconite hole	SAMN24469107	-77.5687	163.299	Antarctic
PRJNA480849Sample173	SRR17375834	PRJNA480849	6899	788	SAMN24469106	2016-11-01	Illumina MiSeq	uncalculated	uncalculated	Antarctica: Taylor Valley	SAMN24469106	cryoconite hole	SAMN24469106	-77.5686	163.298	Antarctic
PRJNA480849Sample335	SRR17375830	PRJNA480849	10166	824	SAMN24469110	2016-11-01	Illumina MiSeq	uncalculated	uncalculated	Antarctica: Taylor Valley	SAMN24469110	cryoconite hole	SAMN24469110	-77.5685	163.299	Antarctic
PRJNA514205Sample2	SRR8426636	PRJNA514205	22704	280	SAMN10721260	missing	Illumina MiSeq	uncalculated	uncalculated	Fildes Peninsula	SAMN10721260	cryoconite hole	SAMN10721260	missing	missing	Antarctic
PRJNA514205Sample6	SRR8426640	PRJNA514205	27886	302	SAMN10721264	missing	Illumina MiSeq	uncalculated	uncalculated	Fildes Peninsula	SAMN10721264	cryoconite hole	SAMN10721264	missing	missing	Antarctic
PRJNA514205Sample5	SRR8426633	PRJNA514205	28521	261	SAMN10721263	missing	Illumina MiSeq	uncalculated	uncalculated	Fildes Peninsula	SAMN10721263	cryoconite hole	SAMN10721263	missing	missing	Antarctic
PRJNA514205Sample9	SRR8426634	PRJNA514205	22497	158	SAMN10721262	missing	Illumina MiSeq	uncalculated	uncalculated	Fildes Peninsula	SAMN10721262	cryoconite hole	SAMN10721262	missing	missing	Antarctic
PRJNA529498Sample16	SRR8799179	PRJNA529498	138157	361	SAMN11268738	2017-01-31	Illumina MiSeq	uncalculated	uncalculated	Antarctica: Queen Maud Land	SAMN11268738	cryoconite hole	SAMN11268738	-72.0129	22.8289	Antarctic
PRJNA529498Sample19	SRR8799192	PRJNA529498	67099	206	SAMN11268753	2017-02-08	Illumina MiSeq	uncalculated	uncalculated	Antarctica: Queen Maud Land	SAMN11268753	cryoconite hole	SAMN11268753	-72.0129	22.8289	Antarctic
PRJNA529498Sample3	SRR8799193	PRJNA529498	57450	258	SAMN11268754	2017-02-08	Illumina MiSeq	uncalculated	uncalculated	Antarctica: Queen Maud Land	SAMN11268754	cryoconite hole	SAMN11268754	-72.0129	22.8289	Antarctic
PRJNA529498Sample6	SRR8799194	PRJNA529498	71426	412	SAMN11268755	2017-02-08	Illumina MiSeq	uncalculated	uncalculated	Antarctica: Queen Maud Land	SAMN11268755	cryoconite hole	SAMN11268755	-72.0129	22.8289	Antarctic
f392	SRR12805387	PRJNA668398	13739	878	SAMN16408948	2017-12-01	Illumina MiSeq	uncalculated	uncalculated	Antarctica: Taylor Valley	SAMN16408948	cryoconite hole	SAMN16408948	-77.7303	162.058	Antarctic
f391	SRR12805386	PRJNA668398	14827	817	SAMN16408949	2017-12-01	Illumina MiSeq	uncalculated	uncalculated	Antarctica: Taylor Valley	SAMN16408949	cryoconite hole	SAMN16408949	-77.7303	162.058	Antarctic
f389	SRR12805384	PRJNA668398	13429	603	SAMN16408950	2017-12-01	Illumina MiSeq	uncalculated	uncalculated	Antarctica: Taylor Valley	SAMN16408950	cryoconite hole	SAMN16408950	-77.7303	162.058	Antarctic
f397	SRR12805392	PRJNA668398	19886	870	SAMN16408943	2017-12-01	Illumina MiSeq	uncalculated	uncalculated	Antarctica: Taylor Valley	SAMN16408943	cryoconite hole	SAMN16408943	-77.7303	162.058	Antarctic
f388	SRR12805383	PRJNA668398	19156	717	SAMN16408951	2017-12-01	Illumina MiSeq	uncalculated	uncalculated	Antarctica: Taylor Valley	SAMN16408951	cryoconite hole	SAMN16408951	-77.7303	-162.058	Antarctic
f393	SRR12805388	PRJNA668398	16878	546	SAMN16408947	2017-12-01	Illumina MiSeq	uncalculated	uncalculated	Antarctica: Taylor Valley	SAMN16408947	cryoconite hole	SAMN16408947	-77.7303	-162.058	Antarctic
f394	SRR12805389	PRJNA668398	17667	607	SAMN16408946	2017-12-01	Illumina MiSeq	uncalculated	uncalculated	Antarctica: Taylor Valley	SAMN16408946	cryoconite hole	SAMN16408946	-77.7303	-162.058	Antarctic
f395	SRR12805390	PRJNA668398	20003	485	SAMN16408945	2017-12-01	Illumina MiSeq	uncalculated	uncalculated	Antarctica: Taylor Valley	SAMN16408945	cryoconite hole	SAMN16408945	-77.7303	-162.058	Antarctic
f396	SRR12805391	PRJNA668398	19324	723	SAMN16408944	2017-12-01	Illumina MiSeq	uncalculated	uncalculated	Antarctica: Taylor Valley	SAMN16408944	cryoconite hole	SAMN16408944	-77.7303	-162.058	Antarctic
f403	SRR12805398	PRJNA668398	18017	1014	SAMN16408938	2017-12-01	Illumina MiSeq	uncalculated	uncalculated	Antarctica: Taylor Valley	SAMN16408938	cryoconite hole	SAMN16408938	-77.6191	162.937	Antarctic
f385	SRR12805374	PRJNA668398	19578	921	SAMN16408924	2017-12-01	Illumina MiSeq	uncalculated	uncalculated	Antarctica: Taylor Valley	SAMN16408924	cryoconite hole	SAMN16408924	-77.6191	162.937	Antarctic
f390	SRR12805385	PRJNA668398	16798	722	SAMN16408923	2017-12-01	Illumina MiSeq	uncalculated	uncalculated	Antarctica: Taylor Valley	SAMN16408923	cryoconite hole	SAMN16408923	-77.6191	162.937	Antarctic
f347	SRR12805330	PRJNA668398	9657	830	SAMN16408928	2017-12-01	Illumina MiSeq	uncalculated	uncalculated	Antarctica: Taylor Valley	SAMN16408928	cryoconite hole	SAMN16408928	-77.6191	162.937	Antarctic
f406	SRR12805401	PRJNA668398	14777	1009	SAMN16408935	2017-12-01	Illumina MiSeq	uncalculated	uncalculated	Antarctica: Taylor Valley	SAMN16408935	cryoconite hole	SAMN16408935	-77.6191	162.937	Antarctic
f411	SRR12805406	PRJNA668398	14959	997	SAMN16408930	2017-12-01	Illumina MiSeq	uncalculated	uncalculated	Antarctica: Taylor Valley	SAMN16408930	cryoconite hole	SAMN16408930	-77.6191	162.937	Antarctic
f375	SRR12805363	PRJNA668398	15999	1065	SAMN16408925	2017-12-01	Illumina MiSeq	uncalculated	uncalculated	Antarctica: Taylor Valley	SAMN16408925	cryoconite hole	SAMN16408925	-77.6191	162.937	Antarctic
f346	SRR12805327	PRJNA668398	14798	1002	SAMN16408929	2017-12-01	Illumina MiSeq	uncalculated	uncalculated	Antarctica: Taylor Valley	SAMN16408929	cryoconite hole	SAMN16408929	-77.6191	162.937	Antarctic
f409	SRR12805404	PRJNA668398	18507	907	SAMN16408932	2017-12-01	Illumina MiSeq	uncalculated	uncalculated	Antarctica: Taylor Valley	SAMN16408932	cryoconite hole	SAMN16408932	-77.6191	162.937	Antarctic
f407	SRR12805402	PRJNA668398	17596	821	SAMN16408934	2017-12-01	Illumina MiSeq	uncalculated	uncalculated	Antarctica: Taylor Valley	SAMN16408934	cryoconite hole	SAMN16408934	-77.6191	162.937	Antarctic
f399	SRR12805394	PRJNA668398	18320	722	SAMN16408941	2017-12-01	Illumina MiSeq	uncalculated	uncalculated	Antarctica: Taylor Valley	SAMN16408941	cryoconite hole	SAMN16408941	-77.6191	162.937	Antarctic
f398	SRR12805393	PRJNA668398	15471	565	SAMN16408942	2017-12-01	Illumina MiSeq	uncalculated	uncalculated	Antarctica: Taylor Valley	SAMN16408942	cryoconite hole	SAMN16408942	-77.6191	162.937	Antarctic
PRJNA997912Sample25	SRR25396447	PRJNA997912	6906	822	SAMN36692225	2020	Illumina MiSeq	uncalculated	uncalculated	Antarctica: Livingstone Island	SAMN36692225	cryoconite hole	SAMN36692225	-62.6897	-60.4178	Antarctic
PRJNA997912Sample37	SRR25396451	PRJNA997912	6100	718	SAMN36692224	2020	Illumina MiSeq	uncalculated	uncalculated	Antarctica: Livingstone Island	SAMN36692224	cryoconite hole	SAMN36692224	-62.6897	-60.4178	Antarctic
PRJNA997912Sample24	SRR25396444	PRJNA997912	7415	841	SAMN36692225	2020	Illumina MiSeq	uncalculated	uncalculated	Antarctica: Livingstone Island	SAMN36692225	cryoconite hole	SAMN36692225	-62.6897	-60.4178	Antarctic
PRJNA997912Sample43	SRR25396446	PRJNA997912	7876	895	SAMN36692225	2020	Illumina MiSeq	uncalculated	uncalculated	Antarctica: Livingstone Island	SAMN36692225	cryoconite hole	SAMN36692225	-62.6897	-60.4178	Antarctic
PRJNA997912Sample34	SRR25396452	PRJNA997912	6478	703	SAMN36692224	2020	Illumina MiSeq	uncalculated	uncalculated	Antarctica: Livingstone Island	SAMN36692224	cryoconite hole	SAMN36692224	-62.6897	-60.4178	Antarctic
PRJNA997912Sample16	SRR25396449	PRJNA997912	9524	888	SAMN36692224	2020	Illumina MiSeq	uncalculated	uncalculated	Antarctica: Livingstone Island	SAMN36692224	cryoconite hole	SAMN36692224	-62.6897	-60.4178	Antarctic
PRJNA997912Sample38	SRR25396455	PRJNA997912	6962	736	SAMN36692223	2020	Illumina MiSeq	uncalculated	uncalculated	Antarctica: Livingstone Island	SAMN36692223	cryoconite hole	SAMN36692223	-62.6856	-60.4056	Antarctic
PRJNA997912Sample58	SRR25396456	PRJNA997912	9090	793	SAMN36692223	2020	Illumina MiSeq	uncalculated	uncalculated	Antarctica: Livingstone Island	SAMN36692223	cryoconite hole	SAMN36692223	-62.6856	-60.4056	Antarctic
PRJNA997912Sample69	SRR25396457	PRJNA997912	11046	758	SAMN36692222	2020	Illumina MiSeq	uncalculated	uncalculated	Antarctica: Livingstone Island	SAMN36692222	cryoconite hole	SAMN36692222	-62.6856	-60.4056	Antarctic
PRJNA997912Sample17	SRR25396459	PRJNA997912	13082	809	SAMN36692222	2020	Illumina MiSeq	uncalculated	uncalculated	Antarctica: Livingstone Island	SAMN36692222	cryoconite hole	SAMN36692222	-62.6856	-60.4056	Antarctic
f994	DRR141364	PRJDB7127	24210	1057	SAMD00129967	2013-07-01	Illumina MiSeq	Greenland	North America	Greenland:Bowdoin Glacier	SAMD00129967	Cryoconite hole debris	SAMD00129967	77.6691	-68.5827	Arctic
f1099	DRR147203	PRJDB7127	16284	843	SAMD00132233	2013-07-01	Illumina MiSeq	Greenland	North America	Greenland:Sun Glacier	SAMD00132233	Cryoconite hole debris	SAMD00132233	77.7766	-69.455	Arctic
f1010	DRR144682	PRJDB7127	19577	888	SAMD00132009	2013-07-01	Illumina MiSeq	Greenland	North America	Greenland:Meehan Glacier	SAMD00132009	Cryoconite hole debris	SAMD00132009	77.8744	-70.3127	Arctic
f1021	DRR144693	PRJDB7127	16500	709	SAMD00132020	2013-07-01	Illumina MiSeq	Greenland	North America	Greenland:Morris Jesup Glacier	SAMD00132020	Cryoconite hole debris	SAMD00132020	77.8878	-71.1392	Arctic
PRJNA825340Sample16	SRR18739292	PRJNA825340	43978	1647	SAMN27512306	2015	Illumina MiSeq	India	Asia	India:Himachal Pradesh	SAMN27512306	Cryoconite hole debris	SAMN27512306	32.3956	77.7028	Tibetan Plateau
PRJNA825340Sample9	SRR18739283	PRJNA825340	47348	1540	SAMN27512307	2015	Illumina MiSeq	India	Asia	India:Himachal Pradesh	SAMN27512307	Cryoconite hole debris	SAMN27512307	32.5836	-77.6619	Tibetan Plateau
PRJNA825340Sample5	SRR24199800	PRJNA825340	44260	1929	SAMN34228089	2019	Illumina MiSeq	uncalculated	uncalculated	Antarctica	SAMN34228089	Cryoconite hole debris	SAMN34228089	-69.4198	76.225	Antarctic
PRJNA825340Sample4	SRR24199805	PRJNA825340	43751	1555	SAMN34228084	2019	Illumina MiSeq	uncalculated	uncalculated	Antarctica	SAMN34228084	Cryoconite hole debris	SAMN34228084	-69.4198	76.225	Antarctic
f1154	SRR24199789	PRJNA825340	90478	1704	SAMN34228050	2019	Illumina MiSeq	uncalculated	uncalculated	Antarctica	SAMN34228050	Cryoconite hole debris	SAMN34228050	-69.4198	-76.225	Antarctic
f1155	SRR24199790	PRJNA825340	83051	1701	SAMN34228049	2019	Illumina MiSeq	uncalculated	uncalculated	Antarctica	SAMN34228049	Cryoconite hole debris	SAMN34228049	-69.4198	-76.225	Antarctic
f1156	SRR24199791	PRJNA825340	85966	1955	SAMN34228048	2019	Illumina MiSeq	uncalculated	uncalculated	Antarctica	SAMN34228048	Cryoconite hole debris	SAMN34228048	-69.4198	-76.225	Antarctic
f1157	SRR24199792	PRJNA825340	93283	2065	SAMN34228047	2019	Illumina MiSeq	uncalculated	uncalculated	Antarctica	SAMN34228047	Cryoconite hole debris	SAMN34228047	-69.4198	-76.225	Antarctic
f1158	SRR24199793	PRJNA825340	91320	2421	SAMN34228095	2019	Illumina MiSeq	uncalculated	uncalculated	Antarctica	SAMN34228095	Cryoconite hole debris	SAMN34228095	-69.4198	-76.225	Antarctic
PRJNA825340Sample13	SRR24199794	PRJNA825340	47144	1705	SAMN34228094	2019	Illumina MiSeq	uncalculated	uncalculated	Antarctica	SAMN34228094	Cryoconite hole debris	SAMN34228094	-69.4198	-76.225	Antarctic
f1159	SRR24199795	PRJNA825340	95914	1984	SAMN34228093	2019	Illumina MiSeq	uncalculated	uncalculated	Antarctica	SAMN34228093	Cryoconite hole debris	SAMN34228093	-69.4198	-76.225	Antarctic
f1160	SRR24199796	PRJNA825340	86326	2772	SAMN34228092	2019	Illumina MiSeq	uncalculated	uncalculated	Antarctica	SAMN34228092	Cryoconite hole debris	SAMN34228092	-69.4198	-76.225	Antarctic
f1161	SRR24199797	PRJNA825340	88083	2392	SAMN34228091	2019	Illumina MiSeq	uncalculated	uncalculated	Antarctica	SAMN34228091	Cryoconite hole debris	SAMN34228091	-69.4198	-76.225	Antarctic
f1162	SRR24199798	PRJNA825340	93291	2302	SAMN34228046	2019	Illumina MiSeq	uncalculated	uncalculated	Antarctica	SAMN34228046	Cryoconite hole debris	SAMN34228046	-69.4198	-76.225	Antarctic
f1163	SRR24199799	PRJNA825340	82161	2510	SAMN34228090	2019	Illumina MiSeq	uncalculated	uncalculated	Antarctica	SAMN34228090	Cryoconite hole debris	SAMN34228090	-69.4198	-76.225	Antarctic
f1164	SRR24199801	PRJNA825340	81855	2505	SAMN34228088	2019	Illumina MiSeq	uncalculated	uncalculated	Antarctica	SAMN34228088	Cryoconite hole debris	SAMN34228088	-69.4198	-76.225	Antarctic
f1165	SRR24199802	PRJNA825340	89246	2314	SAMN34228087	2019	Illumina MiSeq	uncalculated	uncalculated	Antarctica	SAMN34228087	Cryoconite hole debris	SAMN34228087	-69.4198	-76.225	Antarctic
f1166	SRR24199803	PRJNA825340	91836	2331	SAMN34228086	2019	Illumina MiSeq	uncalculated	uncalculated	Antarctica	SAMN34228086	Cryoconite hole debris	SAMN34228086	-69.4198	-76.225	Antarctic
f1167	SRR24199804	PRJNA825340	95175	2345	SAMN34228085	2019	Illumina MiSeq	uncalculated	uncalculated	Antarctica	SAMN34228085	Cryoconite hole debris	SAMN34228085	-69.4198	-76.225	Antarctic
PRJNA825340Sample1	SRR24199806	PRJNA825340	46133	1660	SAMN34228083	2019	Illumina MiSeq	uncalculated	uncalculated	Antarctica	SAMN34228083	Cryoconite hole debris	SAMN34228083	-69.4198	-76.225	Antarctic
f1168	SRR24199807	PRJNA825340	99453	2001	SAMN34228082	2019	Illumina MiSeq	uncalculated	uncalculated	Antarctica	SAMN34228082	Cryoconite hole debris	SAMN34228082	-69.4198	-76.225	Antarctic
f1169	SRR24199808	PRJNA825340	88595	2162	SAMN34228081	2019	Illumina MiSeq	uncalculated	uncalculated	Antarctica	SAMN34228081	Cryoconite hole debris	SAMN34228081	-69.4198	-76.225	Antarctic
PRJNA825340Sample2	SRR24199809	PRJNA825340	45900	1291	SAMN34228045	2019	Illumina MiSeq	uncalculated	uncalculated	Antarctica	SAMN34228045	Cryoconite hole debris	SAMN34228045	-69.4198	-76.225	Antarctic
f1170	SRR24199810	PRJNA825340	88943	2306	SAMN34228080	2019	Illumina MiSeq	uncalculated	uncalculated	Antarctica	SAMN34228080	Cryoconite hole debris	SAMN34228080	-69.4198	-76.225	Antarctic
f1171	SRR24199811	PRJNA825340	96501	2363	SAMN34228079	2019	Illumina MiSeq	uncalculated	uncalculated	Antarctica	SAMN34228079	Cryoconite hole debris	SAMN34228079	-69.4198	-76.225	Antarctic
f1172	SRR24199812	PRJNA825340	95797	2386	SAMN34228078	2019	Illumina MiSeq	uncalculated	uncalculated	Antarctica	SAMN34228078	Cryoconite hole debris	SAMN34228078	-69.4198	-76.225	Antarctic
f1173	SRR24199813	PRJNA825340	96470	1802	SAMN34228077	2019	Illumina MiSeq	uncalculated	uncalculated	Antarctica	SAMN34228077	Cryoconite hole debris	SAMN34228077	-69.4198	-76.225	Antarctic
f1174	SRR24199815	PRJNA825340	91007	1969	SAMN34228075	2019	Illumina MiSeq	uncalculated	uncalculated	Antarctica	SAMN34228075	Cryoconite hole debris	SAMN34228075	-69.4198	-76.225	Antarctic
f1175	SRR24199816	PRJNA825340	89312	2491	SAMN34228074	2019	Illumina MiSeq	uncalculated	uncalculated	Antarctica	SAMN34228074	Cryoconite hole debris	SAMN34228074	-69.4198	-76.225	Antarctic
f1176	SRR24199817	PRJNA825340	89749	3074	SAMN34228073	2019	Illumina MiSeq	uncalculated	uncalculated	Antarctica	SAMN34228073	Cryoconite hole debris	SAMN34228073	-69.4198	-76.225	Antarctic
f1177	SRR24199818	PRJNA825340	98175	2440	SAMN34228072	2019	Illumina MiSeq	uncalculated	uncalculated	Antarctica	SAMN34228072	Cryoconite hole debris	SAMN34228072	-69.4198	-76.225	Antarctic
f1178	SRR24199819	PRJNA825340	84676	2777	SAMN34228071	2019	Illumina MiSeq	uncalculated	uncalculated	Antarctica	SAMN34228071	Cryoconite hole debris	SAMN34228071	-69.4198	-76.225	Antarctic
f1179	SRR24199820	PRJNA825340	93996	1929	SAMN34228044	2019	Illumina MiSeq	uncalculated	uncalculated	Antarctica	SAMN34228044	Cryoconite hole debris	SAMN34228044	-69.4198	-76.225	Antarctic
f1180	SRR24199821	PRJNA825340	84215	2619	SAMN34228070	2019	Illumina MiSeq	uncalculated	uncalculated	Antarctica	SAMN34228070	Cryoconite hole debris	SAMN34228070	-69.4198	-76.225	Antarctic
f1181	SRR24199822	PRJNA825340	84920	2750	SAMN34228069	2019	Illumina MiSeq	uncalculated	uncalculated	Antarctica	SAMN34228069	Cryoconite hole debris	SAMN34228069	-69.4198	-76.225	Antarctic
f1182	SRR24199823	PRJNA825340	88450	2658	SAMN34228068	2019	Illumina MiSeq	uncalculated	uncalculated	Antarctica	SAMN34228068	Cryoconite hole debris	SAMN34228068	-69.4198	-76.225	Antarctic
f1183	SRR24199824	PRJNA825340	93471	2199	SAMN34228067	2019	Illumina MiSeq	uncalculated	uncalculated	Antarctica	SAMN34228067	Cryoconite hole debris	SAMN34228067	-69.4198	-76.225	Antarctic
f1184	SRR24199825	PRJNA825340	93671	2659	SAMN34228066	2019	Illumina MiSeq	uncalculated	uncalculated	Antarctica	SAMN34228066	Cryoconite hole debris	SAMN34228066	-69.4198	-76.225	Antarctic
f1185	SRR24199826	PRJNA825340	89704	2378	SAMN34228065	2019	Illumina MiSeq	uncalculated	uncalculated	Antarctica	SAMN34228065	Cryoconite hole debris	SAMN34228065	-69.4198	-76.225	Antarctic
f1186	SRR24199828	PRJNA825340	88958	2276	SAMN34228063	2019	Illumina MiSeq	uncalculated	uncalculated	Antarctica	SAMN34228063	Cryoconite hole debris	SAMN34228063	-69.4198	-76.225	Antarctic
f1187	SRR24199829	PRJNA825340	90595	2806	SAMN34228062	2019	Illumina MiSeq	uncalculated	uncalculated	Antarctica	SAMN34228062	Cryoconite hole debris	SAMN34228062	-69.4198	-76.225	Antarctic
f1188	SRR24199830	PRJNA825340	89573	2405	SAMN34228061	2019	Illumina MiSeq	uncalculated	uncalculated	Antarctica	SAMN34228061	Cryoconite hole debris	SAMN34228061	-69.4198	-76.225	Antarctic
f1189	SRR24199831	PRJNA825340	93365	2627	SAMN34228043	2019	Illumina MiSeq	uncalculated	uncalculated	Antarctica	SAMN34228043	Cryoconite hole debris	SAMN34228043	-69.4198	-76.225	Antarctic
f1190	SRR24199832	PRJNA825340	86357	2381	SAMN34228060	2019	Illumina MiSeq	uncalculated	uncalculated	Antarctica	SAMN34228060	Cryoconite hole debris	SAMN34228060	-69.4198	-76.225	Antarctic
f1191	SRR24199833	PRJNA825340	100950	1988	SAMN34228059	2019	Illumina MiSeq	uncalculated	uncalculated	Antarctica	SAMN34228059	Cryoconite hole debris	SAMN34228059	-69.4198	-76.225	Antarctic
f1192	SRR24199834	PRJNA825340	87425	2229	SAMN34228058	2019	Illumina MiSeq	uncalculated	uncalculated	Antarctica	SAMN34228058	Cryoconite hole debris	SAMN34228058	-69.4198	-76.225	Antarctic
f1193	SRR24199835	PRJNA825340	88035	2017	SAMN34228057	2019	Illumina MiSeq	uncalculated	uncalculated	Antarctica	SAMN34228057	Cryoconite hole debris	SAMN34228057	-69.4198	-76.225	Antarctic
f1194	SRR24199836	PRJNA825340	89952	2252	SAMN34228056	2019	Illumina MiSeq	uncalculated	uncalculated	Antarctica	SAMN34228056	Cryoconite hole debris	SAMN34228056	-69.4198	-76.225	Antarctic
f1195	SRR24199837	PRJNA825340	87717	2230	SAMN34228055	2019	Illumina MiSeq	uncalculated	uncalculated	Antarctica	SAMN34228055	Cryoconite hole debris	SAMN34228055	-69.4198	-76.225	Antarctic
f1196	SRR24199838	PRJNA825340	79326	2489	SAMN34228054	2019	Illumina MiSeq	uncalculated	uncalculated	Antarctica	SAMN34228054	Cryoconite hole debris	SAMN34228054	-69.4198	-76.225	Antarctic
f1197	SRR24199839	PRJNA825340	83318	2142	SAMN34228053	2019	Illumina MiSeq	uncalculated	uncalculated	Antarctica	SAMN34228053	Cryoconite hole debris	SAMN34228053	-69.4198	-76.225	Antarctic
f1198	SRR24199840	PRJNA825340	90663	2130	SAMN34228052	2019	Illumina MiSeq	uncalculated	uncalculated	Antarctica	SAMN34228052	Cryoconite hole debris	SAMN34228052	-69.4198	-76.225	Antarctic
f1199	SRR24199841	PRJNA825340	86808	1817	SAMN34228051	2019	Illumina MiSeq	uncalculated	uncalculated	Antarctica	SAMN34228051	Cryoconite hole debris	SAMN34228051	-69.4198	-76.225	Antarctic
f1200	SRR24199842	PRJNA825340	92735	2376	SAMN34228042	2019	Illumina MiSeq	uncalculated	uncalculated	Antarctica	SAMN34228042	Cryoconite hole debris	SAMN34228042	-69.4198	-76.225	Antarctic
f1201	SRR24199843	PRJNA825340	92685	2633	SAMN34228041	2019	Illumina MiSeq	uncalculated	uncalculated	Antarctica	SAMN34228041	Cryoconite hole debris	SAMN34228041	-69.4198	-76.225	Antarctic
PRJNA825340Sample14	SRR18739303	PRJNA825340	51658	1673	SAMN27512305	2013	Illumina MiSeq	uncalculated	uncalculated	Antarctica	SAMN27512305	Cryoconite hole debris	SAMN27512305	-69.418	-76.2243	Antarctic
PRJNA1126602Sample2	SRR29486208	PRJNA1126602	10994	417	SAMN41947238	2023	Illumina MiSeq	Russia	Europe	Russia: Tyva\, Mongun-Taiga mountain range	SAMN41947238	cryoconite material	SAMN41947238	50.28	90.15	Other alpine regions
PRJNA819567Sample25	SRR18554983	PRJNA819567	34769	1794	SAMN26899946	2019-07-01	Illumina NovaSeq 6000	China	Asia	China: Tibetan Plateau\, QY Glacier	SAMN26899946	cryoconite mounds	SAMN26899946	28.8706	-90.222	Tibetan Plateau
PRJNA819567Sample20	SRR18554982	PRJNA819567	37055	2039	SAMN26899947	2019-07-01	Illumina NovaSeq 6000	China	Asia	China: Tibetan Plateau\, QY Glacier	SAMN26899947	cryoconite mounds	SAMN26899947	28.8707	-90.2216	Tibetan Plateau
PRJNA819567Sample11	SRR18554984	PRJNA819567	35506	1801	SAMN26899945	2019-07-01	Illumina NovaSeq 6000	China	Asia	China: Tibetan Plateau\, QY Glacier	SAMN26899945	cryoconite mounds	SAMN26899945	28.8709	-90.2223	Tibetan Plateau
PRJNA819567Sample15	SRR18554987	PRJNA819567	36184	1755	SAMN26899942	2019-07-01	Illumina NovaSeq 6000	China	Asia	China: Tibetan Plateau\, QY Glacier	SAMN26899942	cryoconite mounds	SAMN26899942	28.871	-90.2219	Tibetan Plateau
PRJNA819567Sample3	SRR18554986	PRJNA819567	38583	1885	SAMN26899943	2019-07-01	Illumina NovaSeq 6000	China	Asia	China: Tibetan Plateau\, QY Glacier	SAMN26899943	cryoconite mounds	SAMN26899943	28.8711	-90.2221	Tibetan Plateau
PRJNA819567Sample37	SRR18554988	PRJNA819567	39009	1980	SAMN26899941	2019-07-01	Illumina NovaSeq 6000	China	Asia	China: Tibetan Plateau\, QY Glacier	SAMN26899941	cryoconite mounds	SAMN26899941	28.8713	-90.2218	Tibetan Plateau
PRJNA819567Sample16	SRR18554985	PRJNA819567	32867	2267	SAMN26899944	2019-07-01	Illumina NovaSeq 6000	China	Asia	China: Tibetan Plateau\, QY Glacier	SAMN26899944	cryoconite mounds	SAMN26899944	28.8714	-90.2224	Tibetan Plateau
PRJNA819567Sample13	SRR18554979	PRJNA819567	39819	1806	SAMN26899949	2019-07-01	Illumina NovaSeq 6000	China	Asia	China: Tibetan Plateau\, QY Glacier	SAMN26899949	cryoconite mounds	SAMN26899949	28.8718	-90.2204	Tibetan Plateau
PRJNA819567Sample5	SRR18554980	PRJNA819567	27926	2064	SAMN26899948	2019-07-01	Illumina NovaSeq 6000	China	Asia	China: Tibetan Plateau\, QY Glacier	SAMN26899948	cryoconite mounds	SAMN26899948	28.8718	-90.2208	Tibetan Plateau
PRJNA819567Sample12	SRR18554989	PRJNA819567	39363	1983	SAMN26899940	2019-07-01	Illumina NovaSeq 6000	China	Asia	China: Tibetan Plateau\, QY Glacier	SAMN26899940	cryoconite mounds	SAMN26899940	28.8718	-90.221	Tibetan Plateau
f329	SRR11822840	PRJNA633749	87105	2230	SAMN14970326	2018-06-01	Illumina HiSeq 2000	India	Asia	India	SAMN14970326	cryoconite sediment	SAMN14970326	32.7589	-77.3277	Tibetan Plateau
f328	SRR11822839	PRJNA633749	88356	2371	SAMN14970327	2018-06-01	Illumina HiSeq 2000	India	Asia	India	SAMN14970327	cryoconite sediment	SAMN14970327	32.7601	-77.3289	Tibetan Plateau
f327	SRR11822838	PRJNA633749	82052	2405	SAMN14970328	2018-06-01	Illumina HiSeq 2000	India	Asia	India	SAMN14970328	cryoconite sediment	SAMN14970328	32.7618	-77.3314	Tibetan Plateau
f336	SRR11822847	PRJNA633749	116480	2177	SAMN14970325	2018-06-01	Illumina HiSeq 2000	India	Asia	India	SAMN14970325	cryoconite sediment	SAMN14970325	32.7619	-77.3334	Tibetan Plateau
PRJNA480849Sample342	SRR17375825	PRJNA480849	5844	458	SAMN24469114	2016-11-01	Illumina MiSeq	uncalculated	uncalculated	Antarctica: Taylor Valley	SAMN24469114	cryoconite sediment	SAMN24469114	-77.7414	162.106	Antarctic
PRJNA819567Sample31	SRR18554999	PRJNA819567	65425	2353	SAMN26899931	2019-07-01	Illumina NovaSeq 6000	China	Asia	China: Tibetan Plateau\, QY Glacier	SAMN26899931	cryoconite sediments	SAMN26899931	28.8691	-90.2225	Tibetan Plateau
PRJNA819567Sample14	SRR18555000	PRJNA819567	54787	2051	SAMN26899930	2019-07-01	Illumina NovaSeq 6000	China	Asia	China: Tibetan Plateau\, QY Glacier	SAMN26899930	cryoconite sediments	SAMN26899930	28.8696	-90.2225	Tibetan Plateau
PRJNA819567Sample18	SRR18555001	PRJNA819567	56722	2059	SAMN26899929	2019-07-01	Illumina NovaSeq 6000	China	Asia	China: Tibetan Plateau\, QY Glacier	SAMN26899929	cryoconite sediments	SAMN26899929	28.87	-90.2224	Tibetan Plateau
PRJNA819567Sample6	SRR18555002	PRJNA819567	67861	2210	SAMN26899928	2019-07-01	Illumina NovaSeq 6000	China	Asia	China: Tibetan Plateau\, QY Glacier	SAMN26899928	cryoconite sediments	SAMN26899928	28.8704	-90.2222	Tibetan Plateau
PRJNA819567Sample30	SRR18554968	PRJNA819567	64654	2752	SAMN26899905	2019-07-01	Illumina NovaSeq 6000	China	Asia	China: Tibetan Plateau\, PL4 Glacier	SAMN26899905	cryoconite sediments	SAMN26899905	29.2524	-96.9316	Tibetan Plateau
PRJNA819567Sample23	SRR18554992	PRJNA819567	125455	3610	SAMN26899902	2019-07-01	Illumina NovaSeq 6000	China	Asia	China: Tibetan Plateau\, PL4 Glacier	SAMN26899902	cryoconite sediments	SAMN26899902	29.2575	-96.9331	Tibetan Plateau
PRJNA819567Sample34	SRR18554970	PRJNA819567	79716	3110	SAMN26899904	2019-07-01	Illumina NovaSeq 6000	China	Asia	China: Tibetan Plateau\, PL4 Glacier	SAMN26899904	cryoconite sediments	SAMN26899904	29.2581	-96.9334	Tibetan Plateau
PRJNA819567Sample8	SRR18554981	PRJNA819567	116051	3801	SAMN26899903	2019-07-01	Illumina NovaSeq 6000	China	Asia	China: Tibetan Plateau\, PL4 Glacier	SAMN26899903	cryoconite sediments	SAMN26899903	29.2586	-96.9335	Tibetan Plateau
PRJNA819567Sample26	SRR18554978	PRJNA819567	67018	2023	SAMN26899950	2019-06-01	Illumina NovaSeq 6000	China	Asia	China: Tibetan Plateau\, TGL Glacier	SAMN26899950	cryoconite sediments	SAMN26899950	33.1102	-92.0286	Tibetan Plateau
PRJNA819567Sample22	SRR18554977	PRJNA819567	50016	1559	SAMN26899951	2019-06-01	Illumina NovaSeq 6000	China	Asia	China: Tibetan Plateau\, TGL Glacier	SAMN26899951	cryoconite sediments	SAMN26899951	33.1105	-92.029	Tibetan Plateau
PRJNA819567Sample1	SRR18554976	PRJNA819567	56633	1652	SAMN26899952	2019-06-01	Illumina NovaSeq 6000	China	Asia	China: Tibetan Plateau\, TGL Glacier	SAMN26899952	cryoconite sediments	SAMN26899952	33.1106	-92.0294	Tibetan Plateau
PRJNA819567Sample35	SRR18554974	PRJNA819567	66643	2018	SAMN26899954	2019-06-01	Illumina NovaSeq 6000	China	Asia	China: Tibetan Plateau\, TGL Glacier	SAMN26899954	cryoconite sediments	SAMN26899954	33.1107	-92.0315	Tibetan Plateau
PRJNA819567Sample17	SRR18554975	PRJNA819567	72145	2035	SAMN26899953	2019-06-01	Illumina NovaSeq 6000	China	Asia	China: Tibetan Plateau\, TGL Glacier	SAMN26899953	cryoconite sediments	SAMN26899953	33.1108	-93.031	Tibetan Plateau
PRJNA819567Sample4	SRR18554973	PRJNA819567	50490	1728	SAMN26899955	2019-06-01	Illumina NovaSeq 6000	China	Asia	China: Tibetan Plateau\, TGL Glacier	SAMN26899955	cryoconite sediments	SAMN26899955	33.1116	-92.0327	Tibetan Plateau
PRJNA819567Sample28	SRR18554971	PRJNA819567	50545	1524	SAMN26899957	2019-06-01	Illumina NovaSeq 6000	China	Asia	China: Tibetan Plateau\, TGL Glacier	SAMN26899957	cryoconite sediments	SAMN26899957	33.112	-92.03	Tibetan Plateau
PRJNA819567Sample2	SRR18554972	PRJNA819567	63124	1754	SAMN26899956	2019-06-01	Illumina NovaSeq 6000	China	Asia	China: Tibetan Plateau\, TGL Glacier	SAMN26899956	cryoconite sediments	SAMN26899956	33.112	-92.0295	Tibetan Plateau
PRJNA819567Sample10	SRR18554969	PRJNA819567	53218	1734	SAMN26899958	2019-06-01	Illumina NovaSeq 6000	China	Asia	China: Tibetan Plateau\, TGL Glacier	SAMN26899958	cryoconite sediments	SAMN26899958	33.1121	-92.0303	Tibetan Plateau
f321	SRR10448637	PRJNA589711	16227	334	SAMN13290064	2016-09-10	Illumina MiSeq	uncalculated	uncalculated	Lewis Glacier, Mount Kenya	SAMN13290064	Cryoconite1	SAMN13290064	missing	missing	Other alpine regions
f312	SRR10448628	PRJNA589711	16614	343	SAMN13290073	2016-09-11	Illumina MiSeq	uncalculated	uncalculated	Lewis Glacier, Mount Kenya	SAMN13290073	Cryoconite10	SAMN13290073	missing	missing	Other alpine regions
f311	SRR10448626	PRJNA589711	16548	349	SAMN13290074	2016-09-11	Illumina MiSeq	uncalculated	uncalculated	Lewis Glacier, Mount Kenya	SAMN13290074	Cryoconite11	SAMN13290074	missing	missing	Other alpine regions
f310	SRR10448625	PRJNA589711	8962	260	SAMN13290075	2016-09-11	Illumina MiSeq	uncalculated	uncalculated	Lewis Glacier, Mount Kenya	SAMN13290075	Cryoconite12	SAMN13290075	missing	missing	Other alpine regions
f309	SRR10448624	PRJNA589711	17182	353	SAMN13290076	2016-09-11	Illumina MiSeq	uncalculated	uncalculated	Lewis Glacier, Mount Kenya	SAMN13290076	Cryoconite13	SAMN13290076	missing	missing	Other alpine regions
f307	SRR10448622	PRJNA589711	15835	398	SAMN13290078	2016-09-11	Illumina MiSeq	uncalculated	uncalculated	Lewis Glacier, Mount Kenya	SAMN13290078	Cryoconite15	SAMN13290078	missing	missing	Other alpine regions
f306	SRR10448621	PRJNA589711	18341	373	SAMN13290079	2016-09-11	Illumina MiSeq	uncalculated	uncalculated	Lewis Glacier, Mount Kenya	SAMN13290079	Cryoconite16	SAMN13290079	missing	missing	Other alpine regions
f305	SRR10448620	PRJNA589711	14101	356	SAMN13290080	2016-09-11	Illumina MiSeq	uncalculated	uncalculated	Lewis Glacier, Mount Kenya	SAMN13290080	Cryoconite17	SAMN13290080	missing	missing	Other alpine regions
f304	SRR10448619	PRJNA589711	32436	460	SAMN13290081	2016-09-11	Illumina MiSeq	uncalculated	uncalculated	Lewis Glacier, Mount Kenya	SAMN13290081	Cryoconite18	SAMN13290081	missing	missing	Other alpine regions
f303	SRR10448618	PRJNA589711	18960	408	SAMN13290082	2016-09-11	Illumina MiSeq	uncalculated	uncalculated	Lewis Glacier, Mount Kenya	SAMN13290082	Cryoconite19	SAMN13290082	missing	missing	Other alpine regions
f320	SRR10448636	PRJNA589711	15098	355	SAMN13290065	2016-09-10	Illumina MiSeq	uncalculated	uncalculated	Lewis Glacier, Mount Kenya	SAMN13290065	Cryoconite2	SAMN13290065	missing	missing	Other alpine regions
f302	SRR10448617	PRJNA589711	32786	652	SAMN13290083	2016-09-11	Illumina MiSeq	uncalculated	uncalculated	Lewis Glacier, Mount Kenya	SAMN13290083	Cryoconite20	SAMN13290083	missing	missing	Other alpine regions
PRJNA480849Sample36	SRR17375929	PRJNA480849	8841	462	SAMN24469140	2016-11-01	Illumina MiSeq	uncalculated	uncalculated	Antarctica: Taylor Valley	SAMN24469140	Cryoconite21	SAMN24469140	-77.7401	162.127	Antarctic
f300	SRR10448614	PRJNA589711	12081	338	SAMN13290085	2016-09-10	Illumina MiSeq	uncalculated	uncalculated	Lewis Glacier, Mount Kenya	SAMN13290085	Cryoconite22	SAMN13290085	missing	missing	Other alpine regions
f299	SRR10448613	PRJNA589711	9914	312	SAMN13290086	2016-09-10	Illumina MiSeq	uncalculated	uncalculated	Lewis Glacier, Mount Kenya	SAMN13290086	Cryoconite23	SAMN13290086	missing	missing	Other alpine regions
f298	SRR10448612	PRJNA589711	20870	649	SAMN13290087	2016-09-10	Illumina MiSeq	uncalculated	uncalculated	Lewis Glacier, Mount Kenya	SAMN13290087	Cryoconite24	SAMN13290087	missing	missing	Other alpine regions
f297	SRR10448611	PRJNA589711	17183	500	SAMN13290088	2016-09-10	Illumina MiSeq	uncalculated	uncalculated	Lewis Glacier, Mount Kenya	SAMN13290088	Cryoconite25	SAMN13290088	missing	missing	Other alpine regions
f296	SRR10448610	PRJNA589711	21645	512	SAMN13290089	2016-09-10	Illumina MiSeq	uncalculated	uncalculated	Lewis Glacier, Mount Kenya	SAMN13290089	Cryoconite26	SAMN13290089	missing	missing	Other alpine regions
f295	SRR10448609	PRJNA589711	13615	444	SAMN13290090	2016-09-10	Illumina MiSeq	uncalculated	uncalculated	Lewis Glacier, Mount Kenya	SAMN13290090	Cryoconite27	SAMN13290090	missing	missing	Other alpine regions
f294	SRR10448608	PRJNA589711	23877	541	SAMN13290091	2016-09-10	Illumina MiSeq	uncalculated	uncalculated	Lewis Glacier, Mount Kenya	SAMN13290091	Cryoconite28	SAMN13290091	missing	missing	Other alpine regions
f293	SRR10448607	PRJNA589711	15203	458	SAMN13290092	2016-09-10	Illumina MiSeq	uncalculated	uncalculated	Lewis Glacier, Mount Kenya	SAMN13290092	Cryoconite29	SAMN13290092	missing	missing	Other alpine regions
f319	SRR10448635	PRJNA589711	14636	294	SAMN13290066	2016-09-10	Illumina MiSeq	uncalculated	uncalculated	Lewis Glacier, Mount Kenya	SAMN13290066	Cryoconite3	SAMN13290066	missing	missing	Other alpine regions
f292	SRR10448606	PRJNA589711	11562	466	SAMN13290093	2016-09-10	Illumina MiSeq	uncalculated	uncalculated	Lewis Glacier, Mount Kenya	SAMN13290093	Cryoconite30	SAMN13290093	missing	missing	Other alpine regions
f291	SRR10448604	PRJNA589711	17436	432	SAMN13290094	2016-09-10	Illumina MiSeq	uncalculated	uncalculated	Lewis Glacier, Mount Kenya	SAMN13290094	Cryoconite31	SAMN13290094	missing	missing	Other alpine regions
f290	SRR10448603	PRJNA589711	21853	501	SAMN13290095	2016-09-10	Illumina MiSeq	uncalculated	uncalculated	Lewis Glacier, Mount Kenya	SAMN13290095	Cryoconite32	SAMN13290095	missing	missing	Other alpine regions
f289	SRR10448602	PRJNA589711	13496	428	SAMN13290096	2016-09-10	Illumina MiSeq	uncalculated	uncalculated	Lewis Glacier, Mount Kenya	SAMN13290096	Cryoconite33	SAMN13290096	missing	missing	Other alpine regions
f288	SRR10448601	PRJNA589711	18515	468	SAMN13290097	2016-09-10	Illumina MiSeq	uncalculated	uncalculated	Lewis Glacier, Mount Kenya	SAMN13290097	Cryoconite34	SAMN13290097	missing	missing	Other alpine regions
f287	SRR10448600	PRJNA589711	18236	445	SAMN13290098	2016-09-10	Illumina MiSeq	uncalculated	uncalculated	Lewis Glacier, Mount Kenya	SAMN13290098	Cryoconite35	SAMN13290098	missing	missing	Other alpine regions
f318	SRR10448634	PRJNA589711	16671	444	SAMN13290067	2016-09-10	Illumina MiSeq	uncalculated	uncalculated	Lewis Glacier, Mount Kenya	SAMN13290067	Cryoconite4	SAMN13290067	missing	missing	Other alpine regions
f317	SRR10448633	PRJNA589711	14951	461	SAMN13290068	2016-09-10	Illumina MiSeq	uncalculated	uncalculated	Lewis Glacier, Mount Kenya	SAMN13290068	Cryoconite5	SAMN13290068	missing	missing	Other alpine regions
f316	SRR10448632	PRJNA589711	15626	374	SAMN13290069	2016-09-11	Illumina MiSeq	uncalculated	uncalculated	Lewis Glacier, Mount Kenya	SAMN13290069	Cryoconite6	SAMN13290069	missing	missing	Other alpine regions
f315	SRR10448631	PRJNA589711	14995	381	SAMN13290070	2016-09-11	Illumina MiSeq	uncalculated	uncalculated	Lewis Glacier, Mount Kenya	SAMN13290070	Cryoconite7	SAMN13290070	missing	missing	Other alpine regions
f314	SRR10448630	PRJNA589711	15972	404	SAMN13290071	2016-09-11	Illumina MiSeq	uncalculated	uncalculated	Lewis Glacier, Mount Kenya	SAMN13290071	Cryoconite8	SAMN13290071	missing	missing	Other alpine regions
f313	SRR10448629	PRJNA589711	15236	367	SAMN13290072	2016-09-11	Illumina MiSeq	uncalculated	uncalculated	Lewis Glacier, Mount Kenya	SAMN13290072	Cryoconite9	SAMN13290072	missing	missing	Other alpine regions
f833	SRR27784592	PRJNA1071093	17845	1644	SAMN39671640	2018-01-01	Illumina MiSeq	uncalculated	uncalculated	Antarctica: Taylor Valley	SAMN39671640	DNA cryoconite4.3	SAMN39671640	-77.6101	162.955	Antarctic
PRJNA997912Sample52	SRR25396453	PRJNA997912	8743	793	SAMN36692223	2020	Illumina MiSeq	uncalculated	uncalculated	Antarctica: Livingstone Island	SAMN36692223	DNA cryoconite5.1	SAMN36692223	-62.6856	-60.4056	Antarctic
f254	ERR834168	PRJEB8981	21782	369	SAMEA3316363	2013-07-10	Illumina MiSeq	Italy	Europe	Alps	SAMEA3316363	Endoglacial Sediment	SAMEA3316363	-10.5866	-46.3963	Other alpine regions
f255	ERR834169	PRJEB8981	21517	360	SAMEA3316364	2013-07-10	Illumina MiSeq	Italy	Europe	Alps	SAMEA3316364	Endoglacial Sediment	SAMEA3316364	-10.5864	-46.3963	Other alpine regions
f256	ERR834170	PRJEB8981	14920	348	SAMEA3316365	2013-07-10	Illumina MiSeq	Italy	Europe	Alps	SAMEA3316365	Endoglacial Sediment	SAMEA3316365	-10.5861	-46.3963	Other alpine regions
f257	ERR834171	PRJEB8981	15202	268	SAMEA3316360	2013-08-28	Illumina MiSeq	Italy	Europe	Alps	SAMEA3316360	Endoglacial Sediment	SAMEA3316360	-10.5861	-46.3961	Other alpine regions
f258	ERR834172	PRJEB8981	24017	238	SAMEA3316361	2013-08-28	Illumina MiSeq	Italy	Europe	Alps	SAMEA3316361	Endoglacial Sediment	SAMEA3316361	-10.5861	-46.3961	Other alpine regions
f259	ERR834173	PRJEB8981	10421	281	SAMEA3316362	2013-08-28	Illumina MiSeq	Italy	Europe	Alps	SAMEA3316362	Endoglacial Sediment	SAMEA3316362	-10.5858	-46.397	Other alpine regions
f996	DRR144668	PRJDB7127	22964	1111	SAMD00131995	2013-07-01	Illumina MiSeq	Greenland	North America	Greenland:Hubbard Glacier	SAMD00131995	glacial debris	SAMD00131995	77.538	-67.8219	Arctic
f1027	DRR147131	PRJDB7127	22790	1142	SAMD00132161	2013-07-01	Illumina MiSeq	Greenland	North America	Greenland:No name glacier next of Tugoto Glacier	SAMD00132161	glacial debris	SAMD00132161	77.5603	-68.7049	Arctic
f325	SRR11822836	PRJNA633749	87927	2865	SAMN14970330	2018-06-01	Illumina HiSeq 2000	India	Asia	India	SAMN14970330	glacial debris	SAMN14970330	32.7805	-77.3355	Tibetan Plateau
f326	SRR11822837	PRJNA633749	62875	2518	SAMN14970329	2018-06-01	Illumina HiSeq 2000	India	Asia	India	SAMN14970329	glacial debris	SAMN14970329	32.7637	77.3353	Tibetan Plateau
f324	SRR11822835	PRJNA633749	70934	2705	SAMN14970331	2018-06-01	Illumina HiSeq 2000	India	Asia	India	SAMN14970331	glacial debris	SAMN14970331	32.7653	77.3376	Tibetan Plateau
PRJNA318626Sample46	SRR3396500	PRJNA318626	31628	698	SAMN04851321	2014-06-26	Illumina MiSeq	Greenland	North America	Greenland: S6	SAMN04851321	glacier cryoconite material	SAMN04851321	67.0472	-49.23	Arctic
PRJEB14999Sample47	ERR1553723	PRJEB14999	14073	1486	SAMEA4360892	2014	Illumina MiSeq	Greenland	North America	Southwest Greenland ice sheet	SAMEA4360892	mudflow	SAMEA4360892	67.0666	-49.3833	Arctic
PRJEB14999Sample7	ERR1553719	PRJEB14999	15684	1608	SAMEA4360888	2014	Illumina MiSeq	Greenland	North America	Southwest Greenland ice sheet	SAMEA4360888	mudflow	SAMEA4360888	67.0666	-49.3833	Arctic
f1222	SRR2553743	PRJNA296701	28547	909	SAMN04102394	2010-12-01	Illumina MiSeq	uncalculated	Antarctica	Diamond Glacier-DGC3	SAMN04102394	sediment	SAMN04102394	-79.5	159	Antarctic
f1223	SRR2553744	PRJNA296701	160811	745	SAMN04102395	2010-12-02	Illumina MiSeq	uncalculated	Antarctica	Diamond Glacier-DGC07	SAMN04102395	sediment	SAMN04102395	-79.5	159	Antarctic
f1234	SRR2553771	PRJNA296701	104021	338	SAMN04102396	2010-12-03	Illumina MiSeq	uncalculated	Antarctica	Diamond Glacier-DGC10	SAMN04102396	sediment	SAMN04102396	-79.5	159	Antarctic
f1235	SRR2553772	PRJNA296701	131593	491	SAMN04102397	2010-12-04	Illumina MiSeq	uncalculated	Antarctica	Diamond Glacier-DGC18	SAMN04102397	sediment	SAMN04102397	-79.5	159	Antarctic
f1236	SRR2553773	PRJNA296701	65262	853	SAMN04102398	2010-12-05	Illumina MiSeq	uncalculated	Antarctica	Diamond Glacier-DGC20	SAMN04102398	sediment	SAMN04102398	-79.5	159	Antarctic
f1237	SRR2553774	PRJNA296701	114206	1738	SAMN04102399	2010-12-06	Illumina MiSeq	uncalculated	Antarctica	Diamond Glacier-DGC21	SAMN04102399	sediment	SAMN04102399	-79.5	159	Antarctic
f1238	SRR2553775	PRJNA296701	131932	1354	SAMN04102400	2010-01-01	Illumina MiSeq	uncalculated	Antarctica	Upper Koettlitz-KGC3	SAMN04102400	sediment	SAMN04102400	-78.18	163.38	Antarctic
f1239	SRR2553776	PRJNA296701	133621	1309	SAMN04102401	2010-01-02	Illumina MiSeq	uncalculated	Antarctica	Upper Koettlitz-KGC7	SAMN04102401	sediment	SAMN04102401	-78.18	163.38	Antarctic
f1240	SRR2553777	PRJNA296701	129253	2032	SAMN04102402	2010-01-03	Illumina MiSeq	uncalculated	Antarctica	Upper Koettlitz-KGC8	SAMN04102402	sediment	SAMN04102402	-78.18	163.38	Antarctic
f1241	SRR2553778	PRJNA296701	105548	1115	SAMN04102403	2010-01-04	Illumina MiSeq	uncalculated	Antarctica	Upper Koettlitz-KGC20	SAMN04102403	sediment	SAMN04102403	-78.18	163.38	Antarctic
f1228	SRR2553749	PRJNA296701	106619	1227	SAMN04102408	2010-01-01	Illumina MiSeq	uncalculated	Antarctica	Lower Koettlitz-MVC1	SAMN04102408	sediment	SAMN04102408	-78.1	165.03	Antarctic
f1229	SRR2553750	PRJNA296701	66271	1091	SAMN04102409	2010-01-02	Illumina MiSeq	uncalculated	Antarctica	Lower Koettlitz-MVC2	SAMN04102409	sediment	SAMN04102409	-78.1	165.03	Antarctic
f1230	SRR2553751	PRJNA296701	70770	1290	SAMN04102410	2010-01-03	Illumina MiSeq	uncalculated	Antarctica	Lower Koettlitz-MVC3	SAMN04102410	sediment	SAMN04102410	-78.1	165.03	Antarctic
f1231	SRR2553752	PRJNA296701	114620	1869	SAMN04102411	2010-01-04	Illumina MiSeq	uncalculated	Antarctica	Lower Koettlitz-MVC4	SAMN04102411	sediment	SAMN04102411	-78.1	165.03	Antarctic
f1233	SRR2553770	PRJNA296701	96247	1885	SAMN04102413	2010-01-06	Illumina MiSeq	uncalculated	Antarctica	Lower Koettlitz-MVC6	SAMN04102413	sediment	SAMN04102413	-78.1	165.03	Antarctic
f1224	SRR2553745	PRJNA296701	60295	657	SAMN04102404	2013-01-01	Illumina MiSeq	uncalculated	Antarctica	Lower Koettlitz-LKGC2	SAMN04102404	sediment	SAMN04102404	-78.08	164.14	Antarctic
f1225	SRR2553746	PRJNA296701	51411	569	SAMN04102405	2013-01-02	Illumina MiSeq	uncalculated	Antarctica	Lower Koettlitz-LKGC3	SAMN04102405	sediment	SAMN04102405	-78.08	164.14	Antarctic
f1226	SRR2553747	PRJNA296701	39166	352	SAMN04102406	2013-01-03	Illumina MiSeq	uncalculated	Antarctica	Lower Koettlitz-LKGC4	SAMN04102406	sediment	SAMN04102406	-78.08	164.14	Antarctic
f1227	SRR2553748	PRJNA296701	50238	555	SAMN04102407	2013-01-04	Illumina MiSeq	uncalculated	Antarctica	Lower Koettlitz-LKGC5	SAMN04102407	sediment	SAMN04102407	-78.08	164.14	Antarctic
f968	SRR7622983	PRJNA483479	26429	595	SAMN09741817	2016-08-06	Illumina MiSeq	USA	North America	USA: Collier Glacier	SAMN09741817	sediment	SAMN09741817	44.1404	-121.763	Other alpine regions
f972	SRR7622987	PRJNA483479	13510	341	SAMN09741821	2016-08-06	Illumina MiSeq	USA	North America	USA: Collier Glacier	SAMN09741821	sediment	SAMN09741821	44.1713	-121.788	Other alpine regions
f967	SRR7622982	PRJNA483479	26124	587	SAMN09741818	2016-08-06	Illumina MiSeq	USA	North America	USA: Collier Glacier	SAMN09741818	sediment	SAMN09741818	44.1805	-121.789	Other alpine regions
f953	SRR7622968	PRJNA483479	38101	1188	SAMN09741814	2016-07-30	Illumina MiSeq	USA	North America	USA: Eliot Glacier	SAMN09741814	sediment	SAMN09741814	45.3856	-121.671	Other alpine regions
f954	SRR7622969	PRJNA483479	16933	932	SAMN09741813	2016-07-30	Illumina MiSeq	USA	North America	USA: Eliot Glacier	SAMN09741813	sediment	SAMN09741813	45.3857	-121.671	Other alpine regions
f950	SRR7622965	PRJNA483479	30152	916	SAMN09741809	2016-07-29	Illumina MiSeq	USA	North America	USA: Mount Adams	SAMN09741809	sediment	SAMN09741809	46.1601	-121.471	Other alpine regions
PRJNA529498Sample10	SRR8799189	PRJNA529498	68273	1070	SAMN11268758	2017-01-30	Illumina MiSeq	uncalculated	uncalculated	Antarctica: Queen Maud Land	SAMN11268758	soil	SAMN11268758	-72.0517	23.255	Antarctic
PRJNA529498Sample23	SRR8799190	PRJNA529498	70863	1407	SAMN11268759	2017-01-30	Illumina MiSeq	uncalculated	uncalculated	Antarctica: Queen Maud Land	SAMN11268759	soil	SAMN11268759	-72.0489	23.2833	Antarctic
PRJNA529498Sample26	SRR8799191	PRJNA529498	109237	1660	SAMN11268760	2017-01-31	Illumina MiSeq	uncalculated	uncalculated	Antarctica: Queen Maud Land	SAMN11268760	soil	SAMN11268760	-72.0127	22.8278	Antarctic
PRJNA529498Sample17	SRR8799188	PRJNA529498	53560	740	SAMN11268757	2017-01-19	Illumina MiSeq	uncalculated	uncalculated	Antarctica: Queen Maud Land	SAMN11268757	soil	SAMN11268757	-71.9458	23.3453	Antarctic
PRJNA529498Sample12	SRR8799195	PRJNA529498	63951	842	SAMN11268756	2017-01-19	Illumina MiSeq	uncalculated	uncalculated	Antarctica: Queen Maud Land	SAMN11268756	soil	SAMN11268756	-71.9454	23.345	Antarctic
f1279	SRR3667421	PRJNA322651	54061	943	SAMN05179488	2009-12-08	Illumina MiSeq	uncalculated	Antarctica	Canada Glacier Ice1	SAMN05179488	Canada Glacier Ice1	SAMN05179488	-77.6156	162.971	Antarctic
f1280	SRR3667422	PRJNA322651	33482	818	SAMN05179489	2009-12-08	Illumina MiSeq	uncalculated	Antarctica	Canada Glacier Ice2	SAMN05179489	Canada Glacier Ice2	SAMN05179489	-77.6156	162.971	Antarctic
PRJNA564214Sample32	SRR10080796	PRJNA564214	8857	86	SAMN12705726	2017-06-26	Illumina MiSeq	Greenland	North America	Greenland	SAMN12705726	Clean ice	SAMN12705726	67.0751	-49.3531	Arctic
PRJNA564214Sample27	SRR10080807	PRJNA564214	19874	177	SAMN12705716	2016-08-14	Illumina MiSeq	Greenland	North America	Greenland	SAMN12705716	Clean ice	SAMN12705716	67.2217	-49.5964	Arctic
PRJNA564214Sample26	SRR10080810	PRJNA564214	31031	330	SAMN12705713	2016-08-02	Illumina MiSeq	Greenland	North America	Greenland	SAMN12705713	Clean ice	SAMN12705713	67.2378	-49.4686	Arctic
PRJNA564214Sample17	SRR10080813	PRJNA564214	35327	211	SAMN12705710	2016-07-30	Illumina MiSeq	Greenland	North America	Greenland	SAMN12705710	Clean ice	SAMN12705710	67.2664	-49.3569	Arctic
PRJNA564214Sample48	SRR10080808	PRJNA564214	45414	497	SAMN12705715	2016-08-02	Illumina MiSeq	Greenland	North America	Greenland	SAMN12705715	Dispersed cryoconite ice	SAMN12705715	67.2378	-49.4686	Arctic
PRJNA564214Sample11	SRR10080812	PRJNA564214	48069	497	SAMN12705711	2016-07-30	Illumina MiSeq	Greenland	North America	Greenland	SAMN12705711	Dispersed cryoconite ice	SAMN12705711	67.2633	-49.3561	Arctic
f912	SRR6495507	PRJNA430887	57027	956	SAMN08380327	2015	Illumina MiSeq	USA	North America	USA: Matanuska Glacier Alaska abalation zone	SAMN08380327	glacial ice	SAMN08380327	61.7026	-147.623	Arctic
f913	SRR6495508	PRJNA430887	10669	234	SAMN08380326	2015	Illumina MiSeq	USA	North America	USA: Matanuska Glacier Alaska abalation zone	SAMN08380326	glacial ice	SAMN08380326	61.7026	-147.623	Arctic
f914	SRR6495509	PRJNA430887	409534	1553	SAMN08380325	2015	Illumina MiSeq	USA	North America	USA: Matanuska Glacier Alaska abalation zone	SAMN08380325	glacial ice	SAMN08380325	61.7026	-147.623	Arctic
f915	SRR6495510	PRJNA430887	75716	1388	SAMN08380324	2015	Illumina MiSeq	USA	North America	USA: Matanuska Glacier Alaska abalation zone	SAMN08380324	glacial ice	SAMN08380324	61.7026	-147.623	Arctic
f916	SRR6495511	PRJNA430887	278602	2224	SAMN08380331	2015	Illumina MiSeq	USA	North America	USA: Matanuska Glacier Alaska abalation zone	SAMN08380331	glacial ice	SAMN08380331	61.7026	-147.623	Arctic
f917	SRR6495512	PRJNA430887	231072	2835	SAMN08380330	2015	Illumina MiSeq	USA	North America	USA: Matanuska Glacier Alaska abalation zone	SAMN08380330	glacial ice	SAMN08380330	61.7026	-147.623	Arctic
f918	SRR6495513	PRJNA430887	843989	2306	SAMN08380329	2015	Illumina MiSeq	USA	North America	USA: Matanuska Glacier Alaska abalation zone	SAMN08380329	glacial ice	SAMN08380329	61.7026	-147.623	Arctic
f919	SRR6495514	PRJNA430887	58419	1192	SAMN08380328	2015	Illumina MiSeq	USA	North America	USA: Matanuska Glacier Alaska abalation zone	SAMN08380328	glacial ice	SAMN08380328	61.7026	-147.623	Arctic
f920	SRR6495517	PRJNA430887	167248	988	SAMN08380312	2014	Illumina MiSeq	USA	North America	USA: Matanuska Glacier Alaska abalation zone	SAMN08380312	glacial ice	SAMN08380312	61.7026	-147.623	Arctic
f921	SRR6495518	PRJNA430887	210868	1002	SAMN08380313	2014	Illumina MiSeq	USA	North America	USA: Matanuska Glacier Alaska abalation zone	SAMN08380313	glacial ice	SAMN08380313	61.7026	-147.623	Arctic
f922	SRR6495519	PRJNA430887	228534	596	SAMN08380306	2014	Illumina MiSeq	USA	North America	USA: Matanuska Glacier Alaska abalation zone	SAMN08380306	glacial ice	SAMN08380306	61.7026	-147.623	Arctic
f923	SRR6495520	PRJNA430887	282537	1678	SAMN08380307	2014	Illumina MiSeq	USA	North America	USA: Matanuska Glacier Alaska abalation zone	SAMN08380307	glacial ice	SAMN08380307	61.7026	-147.623	Arctic
f924	SRR6495521	PRJNA430887	183570	890	SAMN08380304	2014	Illumina MiSeq	USA	North America	USA: Matanuska Glacier Alaska abalation zone	SAMN08380304	glacial ice	SAMN08380304	61.7026	-147.623	Arctic
f925	SRR6495522	PRJNA430887	198450	601	SAMN08380305	2014	Illumina MiSeq	USA	North America	USA: Matanuska Glacier Alaska abalation zone	SAMN08380305	glacial ice	SAMN08380305	61.7026	-147.623	Arctic
f926	SRR6495523	PRJNA430887	153586	547	SAMN08380310	2014	Illumina MiSeq	USA	North America	USA: Matanuska Glacier Alaska abalation zone	SAMN08380310	glacial ice	SAMN08380310	61.7026	-147.623	Arctic
f927	SRR6495524	PRJNA430887	178789	470	SAMN08380311	2014	Illumina MiSeq	USA	North America	USA: Matanuska Glacier Alaska abalation zone	SAMN08380311	glacial ice	SAMN08380311	61.7026	-147.623	Arctic
f928	SRR6495525	PRJNA430887	207091	1110	SAMN08380308	2014	Illumina MiSeq	USA	North America	USA: Matanuska Glacier Alaska abalation zone	SAMN08380308	glacial ice	SAMN08380308	61.7026	-147.623	Arctic
f929	SRR6495526	PRJNA430887	324439	1344	SAMN08380309	2014	Illumina MiSeq	USA	North America	USA: Matanuska Glacier Alaska abalation zone	SAMN08380309	glacial ice	SAMN08380309	61.7026	-147.623	Arctic
f931	SRR6495528	PRJNA430887	337419	4256	SAMN08380323	2015	Illumina MiSeq	USA	North America	USA: Matanuska Glacier Alaska abalation zone	SAMN08380323	glacial ice	SAMN08380323	61.7026	-147.623	Arctic
f932	SRR6495529	PRJNA430887	117366	556	SAMN08380316	2014	Illumina MiSeq	USA	North America	USA: Matanuska Glacier Alaska abalation zone	SAMN08380316	glacial ice	SAMN08380316	61.7026	-147.623	Arctic
f933	SRR6495530	PRJNA430887	164668	1384	SAMN08380317	2014	Illumina MiSeq	USA	North America	USA: Matanuska Glacier Alaska abalation zone	SAMN08380317	glacial ice	SAMN08380317	61.7026	-147.623	Arctic
f934	SRR6495531	PRJNA430887	218370	943	SAMN08380314	2014	Illumina MiSeq	USA	North America	USA: Matanuska Glacier Alaska abalation zone	SAMN08380314	glacial ice	SAMN08380314	61.7026	-147.623	Arctic
f935	SRR6495532	PRJNA430887	142683	562	SAMN08380315	2014	Illumina MiSeq	USA	North America	USA: Matanuska Glacier Alaska abalation zone	SAMN08380315	glacial ice	SAMN08380315	61.7026	-147.623	Arctic
f936	SRR6495534	PRJNA430887	101130	1938	SAMN08380321	2014	Illumina MiSeq	USA	North America	USA: Matanuska Glacier Alaska abalation zone	SAMN08380321	glacial ice	SAMN08380321	61.7026	-147.623	Arctic
f937	SRR6495535	PRJNA430887	65510	973	SAMN08380318	2014	Illumina MiSeq	USA	North America	USA: Matanuska Glacier Alaska abalation zone	SAMN08380318	glacial ice	SAMN08380318	61.7026	-147.623	Arctic
f938	SRR6495536	PRJNA430887	78799	559	SAMN08380319	2014	Illumina MiSeq	USA	North America	USA: Matanuska Glacier Alaska abalation zone	SAMN08380319	glacial ice	SAMN08380319	61.7026	-147.623	Arctic
PRJNA396245Sample1	SRR5891465	PRJNA396245	57541	406	SAMN07444562	2017	Illumina MiSeq	China	Asia	China: Tibetan Plateau	SAMN07444562	glacier ice	SAMN07444562	35.283	81.358	Tibetan Plateau
PRJNA396245Sample9	SRR5892455	PRJNA396245	9183	354	SAMN07444569	2017	Illumina MiSeq	China	Asia	China: Tibetan Plateau	SAMN07444569	glacier ice	SAMN07444569	35.283	81.358	Tibetan Plateau
PRJNA396245Sample2	SRR5892456	PRJNA396245	79280	537	SAMN07444568	2017	Illumina MiSeq	China	Asia	China: Tibetan Plateau	SAMN07444568	glacier ice	SAMN07444568	35.283	81.358	Tibetan Plateau
PRJNA396245Sample10	SRR5892461	PRJNA396245	34154	667	SAMN07444563	2017	Illumina MiSeq	China	Asia	China: Tibetan Plateau	SAMN07444563	glacier ice	SAMN07444563	35.283	81.358	Tibetan Plateau
PRJNA396245Sample3	SRR5892510	PRJNA396245	53566	418	SAMN07444570	2017	Illumina MiSeq	China	Asia	China: Tibetan Plateau	SAMN07444570	glacier ice	SAMN07444570	35.283	81.358	Tibetan Plateau
PRJNA396245Sample11	SRR5892511	PRJNA396245	29505	526	SAMN07444571	2017	Illumina MiSeq	China	Asia	China: Tibetan Plateau	SAMN07444571	glacier ice	SAMN07444571	35.283	81.358	Tibetan Plateau
PRJNA396245Sample4	SRR5892530	PRJNA396245	29516	86	SAMN07444572	2017	Illumina MiSeq	China	Asia	China: Tibetan Plateau	SAMN07444572	glacier ice	SAMN07444572	35.283	81.358	Tibetan Plateau
PRJNA396245Sample12	SRR5892531	PRJNA396245	35126	159	SAMN07444573	2017	Illumina MiSeq	China	Asia	China: Tibetan Plateau	SAMN07444573	glacier ice	SAMN07444573	35.283	81.358	Tibetan Plateau
f1426	SRR6943127	PRJNA430179	55686	666	SAMN08367430	2013-02-22	Illumina MiSeq	uncalculated	uncalculated	Antarctica: Deception	SAMN08367430	glacier ice	SAMN08367430	-62.56	-30.35	Antarctic
f1427	SRR6943230	PRJNA430179	50066	562	SAMN08367430	2013-02-22	Illumina MiSeq	uncalculated	uncalculated	Antarctica: Deception	SAMN08367430	glacier ice	SAMN08367430	-62.56	-30.35	Antarctic
f1439	SRR7825338	PRJNA430179	63568	1167	SAMN08367430	2013-02-22	Illumina MiSeq	uncalculated	uncalculated	Antarctica: Deception	SAMN08367430	glacier ice	SAMN08367430	-62.56	-30.35	Antarctic
f1440	SRR7825445	PRJNA430179	61166	1557	SAMN08367430	2013-02-22	Illumina MiSeq	uncalculated	uncalculated	Antarctica: Deception	SAMN08367430	glacier ice	SAMN08367430	-62.56	-30.35	Antarctic
f1441	SRR7825508	PRJNA430179	89502	661	SAMN08367430	2013-02-22	Illumina MiSeq	uncalculated	uncalculated	Antarctica: Deception	SAMN08367430	glacier ice	SAMN08367430	-62.56	-30.35	Antarctic
f1442	SRR7825509	PRJNA430179	82609	973	SAMN08367430	2013-02-22	Illumina MiSeq	uncalculated	uncalculated	Antarctica: Deception	SAMN08367430	glacier ice	SAMN08367430	-62.56	-30.35	Antarctic
f1443	SRR7825528	PRJNA430179	52562	534	SAMN08367430	2013-02-22	Illumina MiSeq	uncalculated	uncalculated	Antarctica: Deception	SAMN08367430	glacier ice	SAMN08367430	-62.56	-30.35	Antarctic
f1444	SRR7825543	PRJNA430179	50917	846	SAMN08367430	2013-02-22	Illumina MiSeq	uncalculated	uncalculated	Antarctica: Deception	SAMN08367430	glacier ice	SAMN08367430	-62.56	-30.35	Antarctic
f1445	SRR7825544	PRJNA430179	69803	717	SAMN08367430	2013-02-22	Illumina MiSeq	uncalculated	uncalculated	Antarctica: Deception	SAMN08367430	glacier ice	SAMN08367430	-62.56	-30.35	Antarctic
f1446	SRR7825557	PRJNA430179	59662	954	SAMN08367430	2013-02-22	Illumina MiSeq	uncalculated	uncalculated	Antarctica: Deception	SAMN08367430	glacier ice	SAMN08367430	-62.56	-30.35	Antarctic
f1447	SRR7825558	PRJNA430179	95270	901	SAMN08367430	2013-02-22	Illumina MiSeq	uncalculated	uncalculated	Antarctica: Deception	SAMN08367430	glacier ice	SAMN08367430	-62.56	-30.35	Antarctic
f1448	SRR7825559	PRJNA430179	86125	1362	SAMN08367430	2013-02-22	Illumina MiSeq	uncalculated	uncalculated	Antarctica: Deception	SAMN08367430	glacier ice	SAMN08367430	-62.56	-30.35	Antarctic
f1449	SRR7825560	PRJNA430179	83563	873	SAMN08367430	2013-02-22	Illumina MiSeq	uncalculated	uncalculated	Antarctica: Deception	SAMN08367430	glacier ice	SAMN08367430	-62.56	-30.35	Antarctic
f1450	SRR7825561	PRJNA430179	76552	1206	SAMN08367430	2013-02-22	Illumina MiSeq	uncalculated	uncalculated	Antarctica: Deception	SAMN08367430	glacier ice	SAMN08367430	-62.56	-30.35	Antarctic
f1451	SRR7825562	PRJNA430179	81920	820	SAMN08367430	2013-02-22	Illumina MiSeq	uncalculated	uncalculated	Antarctica: Deception	SAMN08367430	glacier ice	SAMN08367430	-62.56	-30.35	Antarctic
f1452	SRR7825563	PRJNA430179	74806	1120	SAMN08367430	2013-02-22	Illumina MiSeq	uncalculated	uncalculated	Antarctica: Deception	SAMN08367430	glacier ice	SAMN08367430	-62.56	-30.35	Antarctic
f1453	SRR7825578	PRJNA430179	72726	766	SAMN08367430	2013-02-22	Illumina MiSeq	uncalculated	uncalculated	Antarctica: Deception	SAMN08367430	glacier ice	SAMN08367430	-62.56	-30.35	Antarctic
f1454	SRR7825580	PRJNA430179	69338	1045	SAMN08367430	2013-02-22	Illumina MiSeq	uncalculated	uncalculated	Antarctica: Deception	SAMN08367430	glacier ice	SAMN08367430	-62.56	-30.35	Antarctic
f1455	SRR7825581	PRJNA430179	86296	794	SAMN08367430	2013-02-22	Illumina MiSeq	uncalculated	uncalculated	Antarctica: Deception	SAMN08367430	glacier ice	SAMN08367430	-62.56	-30.35	Antarctic
f1456	SRR7825582	PRJNA430179	67219	1075	SAMN08367430	2013-02-22	Illumina MiSeq	uncalculated	uncalculated	Antarctica: Deception	SAMN08367430	glacier ice	SAMN08367430	-62.56	-30.35	Antarctic
f1457	SRR8068334	PRJNA430179	35029	952	SAMN08367430	2013-02-22	Illumina MiSeq	uncalculated	uncalculated	Antarctica: Deception	SAMN08367430	glacier ice	SAMN08367430	-62.56	-30.35	Antarctic
f1459	SRR8068354	PRJNA430179	24659	712	SAMN08367430	2013-02-22	Illumina MiSeq	uncalculated	uncalculated	Antarctica: Deception	SAMN08367430	glacier ice	SAMN08367430	-62.56	-30.35	Antarctic
f1465	SRR8074314	PRJNA430179	6522	287	SAMN08367430	2013-02-22	Illumina MiSeq	uncalculated	uncalculated	Antarctica: Deception	SAMN08367430	glacier ice	SAMN08367430	-62.56	-30.35	Antarctic
f1467	SRR8083443	PRJNA430179	8361	491	SAMN08367430	2013-02-22	Illumina MiSeq	uncalculated	uncalculated	Antarctica: Deception	SAMN08367430	glacier ice	SAMN08367430	-62.56	-30.35	Antarctic
f1468	SRR8101552	PRJNA430179	5831	326	SAMN08367430	2013-02-22	Illumina MiSeq	uncalculated	uncalculated	Antarctica: Deception	SAMN08367430	glacier ice	SAMN08367430	-62.56	-30.35	Antarctic
f1469	SRR8101555	PRJNA430179	22426	690	SAMN08367430	2013-02-22	Illumina MiSeq	uncalculated	uncalculated	Antarctica: Deception	SAMN08367430	glacier ice	SAMN08367430	-62.56	-30.35	Antarctic
f1470	SRR8101559	PRJNA430179	13834	488	SAMN08367430	2013-02-22	Illumina MiSeq	uncalculated	uncalculated	Antarctica: Deception	SAMN08367430	glacier ice	SAMN08367430	-62.56	-30.35	Antarctic
f1471	SRR8101560	PRJNA430179	40950	907	SAMN08367430	2013-02-22	Illumina MiSeq	uncalculated	uncalculated	Antarctica: Deception	SAMN08367430	glacier ice	SAMN08367430	-62.56	-30.35	Antarctic
f1472	SRR8101573	PRJNA430179	28486	637	SAMN08367430	2013-02-22	Illumina MiSeq	uncalculated	uncalculated	Antarctica: Deception	SAMN08367430	glacier ice	SAMN08367430	-62.56	-30.35	Antarctic
f1473	SRR8101574	PRJNA430179	53253	942	SAMN08367430	2013-02-22	Illumina MiSeq	uncalculated	uncalculated	Antarctica: Deception	SAMN08367430	glacier ice	SAMN08367430	-62.56	-30.35	Antarctic
f1474	SRR8101579	PRJNA430179	34625	742	SAMN08367430	2013-02-22	Illumina MiSeq	uncalculated	uncalculated	Antarctica: Deception	SAMN08367430	glacier ice	SAMN08367430	-62.56	-30.35	Antarctic
PRJNA636650Sample19	SRR11917320	PRJNA636650	25350	1606	SAMN15082927	2013-02-15	Illumina MiSeq	uncalculated	uncalculated	Antarctica: Signy Island	SAMN15082927	Gourlay_superimposed_ice	SAMN15082927	-60.72	-45.62	Antarctic
PRJNA636650Sample37	SRR11917352	PRJNA636650	90985	2854	SAMN15082924	2013-01-13	Illumina MiSeq	uncalculated	uncalculated	Antarctica: Signy Island	SAMN15082924	Gourlay_superimposed_ice	SAMN15082924	-60.72	-45.62	Antarctic
PRJNA636650Sample23	SRR11917353	PRJNA636650	32866	1497	SAMN15082952	2013-03-12	Illumina MiSeq	uncalculated	uncalculated	Antarctica: Signy Island	SAMN15082952	Gourlay_superimposed_ice	SAMN15082952	-60.72	-45.62	Antarctic
PRJNA636650Sample9	SRR11917356	PRJNA636650	101666	1339	SAMN15082949	2013-02-15	Illumina MiSeq	uncalculated	uncalculated	Antarctica: Signy Island	SAMN15082949	Gourlay_superimposed_ice	SAMN15082949	-60.72	-45.62	Antarctic
PRJNA636650Sample15	SRR11917359	PRJNA636650	43354	1618	SAMN15082946	2013-01-13	Illumina MiSeq	uncalculated	uncalculated	Antarctica: Signy Island	SAMN15082946	Gourlay_superimposed_ice	SAMN15082946	-60.72	-45.62	Antarctic
PRJNA636650Sample4	SRR11917362	PRJNA636650	45448	1138	SAMN15082943	2012-12-13	Illumina MiSeq	uncalculated	uncalculated	Antarctica: Signy Island	SAMN15082943	Gourlay_superimposed_ice	SAMN15082943	-60.72	-45.62	Antarctic
PRJNA636650Sample28	SRR11917367	PRJNA636650	42537	1957	SAMN15082938	2013-02-15	Illumina MiSeq	uncalculated	uncalculated	Antarctica: Signy Island	SAMN15082938	Gourlay_superimposed_ice	SAMN15082938	-60.72	-45.62	Antarctic
PRJNA636650Sample7	SRR11917370	PRJNA636650	49562	2537	SAMN15082935	2013-01-13	Illumina MiSeq	uncalculated	uncalculated	Antarctica: Signy Island	SAMN15082935	Gourlay_superimposed_ice	SAMN15082935	-60.72	-45.62	Antarctic
PRJNA636650Sample36	SRR11917372	PRJNA636650	26739	1221	SAMN15082933	2012-12-13	Illumina MiSeq	uncalculated	uncalculated	Antarctica: Signy Island	SAMN15082933	Gourlay_superimposed_ice	SAMN15082933	-60.72	-45.62	Antarctic
PRJNA636650Sample24	SRR11917375	PRJNA636650	46512	1409	SAMN15082921	2012-12-13	Illumina MiSeq	uncalculated	uncalculated	Antarctica: Signy Island	SAMN15082921	Gourlay_superimposed_ice	SAMN15082921	-60.72	-45.62	Antarctic
f1430	SRR700096	PRJNA189054	63245	2126	SAMN01915363	2011-10-12	Illumina HiSeq 2000	Arctic	Arctic	Byron Glacier, Alaska	SAMN01915363	ice	SAMN01915363	0	0	Arctic
f263	SRR10084715	PRJNA564341	24142	322	SAMN12710440	2015-05-01	Illumina MiSeq	Canada	North America	Canada: Devon Ice Cap	SAMN12710440	ice	SAMN12710440	75.1309	-80.3899	Arctic
f273	SRR10084725	PRJNA564341	74006	936	SAMN12710454	2015-05-01	Illumina MiSeq	Canada	North America	Canada: Devon Ice Cap	SAMN12710454	ice	SAMN12710454	75.1309	-80.3899	Arctic
f278	SRR10084730	PRJNA564341	13653	327	SAMN12710450	2015-05-01	Illumina MiSeq	Canada	North America	Canada: Devon Ice Cap	SAMN12710450	ice	SAMN12710450	75.1309	-80.3899	Arctic
f286	SRR10084738	PRJNA564341	20827	590	SAMN12710434	2015-05-01	Illumina MiSeq	Canada	North America	Canada: Devon Ice Cap	SAMN12710434	ice	SAMN12710434	75.1309	-80.3899	Arctic
f275	SRR10084727	PRJNA564341	106494	4850	SAMN12710453	2015-05-01	Illumina MiSeq	Canada	North America	Canada: Devon Ice Cap	SAMN12710453	Ice	SAMN12710453	75.5688	-81.5694	Arctic
f282	SRR10084734	PRJNA564341	84466	1665	SAMN12710446	2015-05-01	Illumina MiSeq	Canada	North America	Canada: Devon Ice Cap	SAMN12710446	Ice	SAMN12710446	75.5688	-81.5694	Arctic
f265	SRR10084717	PRJNA564341	52487	1086	SAMN12710438	2014-05-01	Illumina MiSeq	Canada	North America	Canada: Devon Ice Cap	SAMN12710438	ice	SAMN12710438	75.6442	-83.3401	Arctic
f283	SRR10084735	PRJNA564341	134544	1372	SAMN12710445	2014-05-01	Illumina MiSeq	Canada	North America	Canada: Devon Ice Cap	SAMN12710445	ice	SAMN12710445	75.6442	-83.3401	Arctic
f453	SRR13180853	PRJNA681925	23050	419	SAMN16974610	2015/2016	Illumina MiSeq	Ecuador	South America	Ecuador	SAMN16974610	ice	SAMN16974610	0.0147	-78.0079	Other alpine regions
f454	SRR13180854	PRJNA681925	28700	1617	SAMN16974609	2015/2016	Illumina MiSeq	Ecuador	South America	Ecuador	SAMN16974609	ice	SAMN16974609	0.0147	-78.0083	Other alpine regions
f440	SRR13180840	PRJNA681925	72122	279	SAMN16974618	2015/2016	Illumina MiSeq	Ecuador	South America	Ecuador	SAMN16974618	ice	SAMN16974618	0.0169	-78.0048	Other alpine regions
f443	SRR13180843	PRJNA681925	37987	1465	SAMN16974615	2015/2016	Illumina MiSeq	Ecuador	South America	Ecuador	SAMN16974615	ice	SAMN16974615	0.017	-78.0044	Other alpine regions
f448	SRR13180848	PRJNA681925	62095	1126	SAMN16974623	2015/2016	Illumina MiSeq	Ecuador	South America	Ecuador	SAMN16974623	ice	SAMN16974623	0.0227	-77.9994	Other alpine regions
f450	SRR13180850	PRJNA681925	55924	1073	SAMN16974621	2015/2016	Illumina MiSeq	Ecuador	South America	Ecuador	SAMN16974621	ice	SAMN16974621	0.0245	-77.9985	Other alpine regions
f444	SRR13180844	PRJNA681925	43563	330	SAMN16974614	2015/2016	Illumina MiSeq	Ecuador	South America	Ecuador	SAMN16974614	ice	SAMN16974614	0.0247	-77.993	Other alpine regions
f446	SRR13180846	PRJNA681925	55026	389	SAMN16974612	2015/2016	Illumina MiSeq	Ecuador	South America	Ecuador	SAMN16974612	ice	SAMN16974612	0.0248	-77.9925	Other alpine regions
f452	SRR13180852	PRJNA681925	46993	591	SAMN16974619	2015/2016	Illumina MiSeq	Ecuador	South America	Ecuador	SAMN16974619	ice	SAMN16974619	0.025	-77.9963	Other alpine regions
f441	SRR13180841	PRJNA681925	25870	84	SAMN16974617	2015/2016	Illumina MiSeq	Ecuador	South America	Ecuador	SAMN16974617	ice	SAMN16974617	0.0254	-77.9938	Other alpine regions
f1058	DRR147162	PRJDB7127	17341	674	SAMD00132192	2013-07-01	Illumina MiSeq	Greenland	North America	Greenland:Scarlet Heart Glacier	SAMD00132192	Ice	SAMD00132192	77.6536	-69.4266	Arctic
f1041	DRR147145	PRJDB7127	18925	782	SAMD00132175	2013-07-01	Illumina MiSeq	Greenland	North America	Greenland:Scarlet Heart Glacier	SAMD00132175	Ice	SAMD00132175	77.6655	-69.4508	Arctic
f1109	DRR147213	PRJDB7127	32785	1283	SAMD00132243	2013-07-01	Illumina MiSeq	Greenland	North America	Greenland:Verhoeff Glacier	SAMD00132243	Ice	SAMD00132243	77.8605	-69.8688	Arctic
f338	SRR1258414	PRJNA243903	368586	138	SAMN02727968	2009-08-01	Illumina MiSeq	Greenland	North America	Greenland: NEEM	SAMN02727968	ice	SAMN02727968	77.45	-51.07	Arctic
f339	SRR1258545	PRJNA243903	926860	111	SAMN02727982	2009-08-01	Illumina MiSeq	Greenland	North America	Greenland: NEEM	SAMN02727982	ice	SAMN02727982	77.45	-51.07	Arctic
f340	SRR1258546	PRJNA243903	1095235	187	SAMN02727984	2010-08-01	Illumina MiSeq	Greenland	North America	Greenland: NEEM	SAMN02727984	ice	SAMN02727984	77.45	-51.07	Arctic
f341	SRR1258547	PRJNA243903	953254	31	SAMN02727985	2009-08-01	Illumina MiSeq	Greenland	North America	Greenland: NEEM	SAMN02727985	ice	SAMN02727985	77.45	-51.07	Arctic
f342	SRR1265733	PRJNA243903	1001638	195	SAMN02740647	2010	Illumina MiSeq	Greenland	North America	Greenland: NEEM	SAMN02740647	ice	SAMN02740647	77.45	-51.07	Arctic
f343	SRR1265779	PRJNA243903	1191902	222	SAMN02740838	2010	Illumina MiSeq	Greenland	North America	Greenland: NEEM	SAMN02740838	ice	SAMN02740838	77.45	-51.07	Arctic
f344	SRR1265803	PRJNA243903	1492659	160	SAMN02740839	2010	Illumina MiSeq	Greenland	North America	Greenland: NEEM	SAMN02740839	ice	SAMN02740839	77.45	-51.07	Arctic
f345	SRR1265804	PRJNA243903	1110197	108	SAMN02740840	2010	Illumina MiSeq	Greenland	North America	Greenland: NEEM	SAMN02740840	ice	SAMN02740840	77.45	-51.07	Arctic
PRJNA893676Sample1	SRR22142438	PRJNA893676	29797	2094	SAMN31525317	2019-07-27	NextSeq 500	Greenland	North America	Greenland: Mittivakkat glacier	SAMN31525317	Ice	SAMN31525317	65.691	-37.857	Arctic
PRJNA893676Sample2	SRR22142440	PRJNA893676	53142	624	SAMN31525315	2019-07-27	Illumina MiSeq	Greenland	North America	Greenland: Mittivakkat glacier	SAMN31525315	Ice	SAMN31525315	65.691	-37.857	Arctic
f750	SRR24392308	PRJNA942590	5317	183	SAMN34511181	2021-07-16	Illumina MiSeq	Greenland	North America	Greenland	SAMN34511181	ice	SAMN34511181	61.1014	-46.8481	Arctic
f751	SRR24392309	PRJNA942590	7447	201	SAMN34511181	2021-07-16	Illumina MiSeq	Greenland	North America	Greenland	SAMN34511181	ice	SAMN34511181	61.1014	-46.8481	Arctic
f752	SRR24392310	PRJNA942590	5809	186	SAMN34511181	2021-07-16	Illumina MiSeq	Greenland	North America	Greenland	SAMN34511181	ice	SAMN34511181	61.1014	-46.8481	Arctic
PRJNA980660Sample5	SRR24836117	PRJNA980660	25262	241	SAMN35639454	2021-07-16	Illumina MiSeq	Greenland	North America	Greenland	SAMN35639454	Ice	SAMN35639454	61.1014	-46.8481	Arctic
PRJNA980660Sample20	SRR24836118	PRJNA980660	13733	180	SAMN35639454	2021-07-16	Illumina MiSeq	Greenland	North America	Greenland	SAMN35639454	Ice	SAMN35639454	61.1014	-46.8481	Arctic
PRJNA980660Sample6	SRR24836119	PRJNA980660	15963	194	SAMN35639454	2021-07-16	Illumina MiSeq	Greenland	North America	Greenland	SAMN35639454	Ice	SAMN35639454	61.1014	-46.8481	Arctic
PRJNA980660Sample17	SRR24836125	PRJNA980660	13945	200	SAMN35639454	2021-07-16	Illumina MiSeq	Greenland	North America	Greenland	SAMN35639454	Ice	SAMN35639454	61.1014	-46.8481	Arctic
PRJNA980660Sample9	SRR24836126	PRJNA980660	12344	186	SAMN35639454	2021-07-16	Illumina MiSeq	Greenland	North America	Greenland	SAMN35639454	Ice	SAMN35639454	61.1014	-46.8481	Arctic
PRJNA980660Sample26	SRR24836127	PRJNA980660	28554	379	SAMN35639455	2021-07-26	Illumina MiSeq	Greenland	North America	Greenland	SAMN35639455	Ice	SAMN35639455	61.1014	-46.8481	Arctic
PRJNA980660Sample21	SRR24836128	PRJNA980660	23009	327	SAMN35639455	2021-07-26	Illumina MiSeq	Greenland	North America	Greenland	SAMN35639455	Ice	SAMN35639455	61.1014	-46.8481	Arctic
PRJNA980660Sample25	SRR24836129	PRJNA980660	35641	379	SAMN35639455	2021-07-26	Illumina MiSeq	Greenland	North America	Greenland	SAMN35639455	Ice	SAMN35639455	61.1014	-46.8481	Arctic
PRJNA980660Sample23	SRR24836130	PRJNA980660	21714	236	SAMN35639455	2021-07-26	Illumina MiSeq	Greenland	North America	Greenland	SAMN35639455	Ice	SAMN35639455	61.1014	-46.8481	Arctic
PRJNA980660Sample15	SRR24836131	PRJNA980660	32132	339	SAMN35639455	2021-07-26	Illumina MiSeq	Greenland	North America	Greenland	SAMN35639455	Ice	SAMN35639455	61.1014	-46.8481	Arctic
f683	SRR18307776	PRJNA657180	64562	2972	SAMN26570456	2019-08-03	Illumina MiSeq	Iceland	Europe	Iceland: Langjoekull glacier	SAMN26570456	Ice	SAMN26570456	64.6346	-20.5385	Arctic
f700	SRR18307793	PRJNA657180	7594	1059	SAMN26570444	2019-08-03	Illumina MiSeq	Iceland	Europe	Iceland: Langjoekull glacier	SAMN26570444	Ice	SAMN26570444	64.6346	-20.5385	Arctic
f677	SRR18307770	PRJNA657180	23851	1821	SAMN26570450	2019-08-02	Illumina MiSeq	Iceland	Europe	Iceland: Snaefellsjoekull glacier	SAMN26570450	Ice	SAMN26570450	64.8141	-23.7503	Arctic
f699	SRR18307792	PRJNA657180	84613	2853	SAMN26570449	2019-08-02	Illumina MiSeq	Iceland	Europe	Iceland: Snaefellsjoekull glacier	SAMN26570449	Ice	SAMN26570449	64.8141	-23.7503	Arctic
f707	SRR18307800	PRJNA657180	7126	1024	SAMN26570437	2019-08-02	Illumina MiSeq	Iceland	Europe	Iceland: Snaefellsjoekull glacier	SAMN26570437	Ice	SAMN26570437	64.8141	-23.7503	Arctic
f709	SRR18307802	PRJNA657180	32641	2221	SAMN26570436	2019-08-02	Illumina MiSeq	Iceland	Europe	Iceland: Snaefellsjoekull glacier	SAMN26570436	Ice	SAMN26570436	64.8141	-23.7503	Arctic
f710	SRR18307803	PRJNA657180	69661	2537	SAMN26570435	2019-08-02	Illumina MiSeq	Iceland	Europe	Iceland: Snaefellsjoekull glacier	SAMN26570435	Ice	SAMN26570435	64.8141	-23.7503	Arctic
f158	ERR4553320	PRJEB40002	51878	410	SAMEA7230633	2017-07-19	Illumina MiSeq	Sweden	Europe		SAMEA7230633	ice	SAMEA7230633	-67.9043	-18.5827	Other alpine regions
f159	ERR4553321	PRJEB40002	59022	933	SAMEA7230634	2017-07-19	Illumina MiSeq	Sweden	Europe		SAMEA7230634	ice	SAMEA7230634	-67.9043	-18.5827	Other alpine regions
f160	ERR4553322	PRJEB40002	68278	696	SAMEA7230635	2017-07-19	Illumina MiSeq	Sweden	Europe		SAMEA7230635	ice	SAMEA7230635	-67.9043	-18.5827	Other alpine regions
f161	ERR4553323	PRJEB40002	98466	1488	SAMEA7230636	2017-07-19	Illumina MiSeq	Sweden	Europe		SAMEA7230636	ice	SAMEA7230636	-67.9043	-18.5827	Other alpine regions
f162	ERR4553324	PRJEB40002	102694	1844	SAMEA7230637	2017-07-19	Illumina MiSeq	Sweden	Europe		SAMEA7230637	ice	SAMEA7230637	-67.9043	-18.5827	Other alpine regions
f163	ERR4553325	PRJEB40002	30751	449	SAMEA7230638	2017-07-19	Illumina MiSeq	Sweden	Europe		SAMEA7230638	ice	SAMEA7230638	-67.9043	-18.5827	Other alpine regions
f172	ERR4553334	PRJEB40002	63692	487	SAMEA7230647	2017-07-22	Illumina MiSeq	Sweden	Europe		SAMEA7230647	ice	SAMEA7230647	-67.9032	-18.5855	Other alpine regions
f173	ERR4553335	PRJEB40002	35265	624	SAMEA7230648	2017-07-22	Illumina MiSeq	Sweden	Europe		SAMEA7230648	ice	SAMEA7230648	-67.9032	-18.5855	Other alpine regions
f174	ERR4553336	PRJEB40002	67549	435	SAMEA7230649	2017-07-22	Illumina MiSeq	Sweden	Europe		SAMEA7230649	ice	SAMEA7230649	-67.9032	-18.5855	Other alpine regions
f175	ERR4553337	PRJEB40002	94639	678	SAMEA7230650	2017-07-22	Illumina MiSeq	Sweden	Europe		SAMEA7230650	ice	SAMEA7230650	-67.9032	-18.5855	Other alpine regions
f176	ERR4553338	PRJEB40002	47364	667	SAMEA7230651	2017-07-22	Illumina MiSeq	Sweden	Europe		SAMEA7230651	ice	SAMEA7230651	-67.9032	-18.5855	Other alpine regions
f177	ERR4553339	PRJEB40002	62638	1160	SAMEA7230652	2017-07-22	Illumina MiSeq	Sweden	Europe		SAMEA7230652	ice	SAMEA7230652	-67.9032	-18.5855	Other alpine regions
f178	ERR4553340	PRJEB40002	52006	658	SAMEA7230653	2017-07-22	Illumina MiSeq	Sweden	Europe		SAMEA7230653	ice	SAMEA7230653	-67.9032	-18.5855	Other alpine regions
f179	ERR4553341	PRJEB40002	95408	320	SAMEA7230654	2017-07-22	Illumina MiSeq	Sweden	Europe		SAMEA7230654	ice	SAMEA7230654	-67.9032	-18.5855	Other alpine regions
f180	ERR4553342	PRJEB40002	48525	831	SAMEA7230655	2017-07-22	Illumina MiSeq	Sweden	Europe		SAMEA7230655	ice	SAMEA7230655	-67.9032	-18.5855	Other alpine regions
f181	ERR4553343	PRJEB40002	101435	442	SAMEA7230656	2017-07-22	Illumina MiSeq	Sweden	Europe		SAMEA7230656	ice	SAMEA7230656	-67.9032	-18.5855	Other alpine regions
f182	ERR4553344	PRJEB40002	54824	631	SAMEA7230657	2017-07-22	Illumina MiSeq	Sweden	Europe		SAMEA7230657	ice	SAMEA7230657	-67.9032	-18.5855	Other alpine regions
f164	ERR4553326	PRJEB40002	17645	1190	SAMEA7230639	2017-07-22	Illumina MiSeq	Sweden	Europe		SAMEA7230639	ice	SAMEA7230639	-67.9031	-18.5849	Other alpine regions
f165	ERR4553327	PRJEB40002	97959	1774	SAMEA7230640	2017-07-22	Illumina MiSeq	Sweden	Europe		SAMEA7230640	ice	SAMEA7230640	-67.9031	-18.5849	Other alpine regions
f166	ERR4553328	PRJEB40002	56033	1069	SAMEA7230641	2017-07-22	Illumina MiSeq	Sweden	Europe		SAMEA7230641	ice	SAMEA7230641	-67.9031	-18.5849	Other alpine regions
f167	ERR4553329	PRJEB40002	57378	746	SAMEA7230642	2017-07-22	Illumina MiSeq	Sweden	Europe		SAMEA7230642	ice	SAMEA7230642	-67.9031	-18.5849	Other alpine regions
f168	ERR4553330	PRJEB40002	48929	354	SAMEA7230643	2017-07-22	Illumina MiSeq	Sweden	Europe		SAMEA7230643	ice	SAMEA7230643	-67.9031	-18.5849	Other alpine regions
f169	ERR4553331	PRJEB40002	41639	805	SAMEA7230644	2017-07-22	Illumina MiSeq	Sweden	Europe		SAMEA7230644	ice	SAMEA7230644	-67.9031	-18.5849	Other alpine regions
f170	ERR4553332	PRJEB40002	72640	855	SAMEA7230645	2017-07-22	Illumina MiSeq	Sweden	Europe		SAMEA7230645	ice	SAMEA7230645	-67.9031	-18.5849	Other alpine regions
f171	ERR4553333	PRJEB40002	74023	791	SAMEA7230646	2017-07-22	Illumina MiSeq	Sweden	Europe		SAMEA7230646	ice	SAMEA7230646	-67.9031	-18.5849	Other alpine regions
f193	ERR4553355	PRJEB40002	19277	625	SAMEA7230668	2017-07-23	Illumina MiSeq	Sweden	Europe		SAMEA7230668	ice	SAMEA7230668	-67.903	-18.589	Other alpine regions
f183	ERR4553345	PRJEB40002	99147	349	SAMEA7230658	2017-07-23	Illumina MiSeq	Sweden	Europe		SAMEA7230658	ice	SAMEA7230658	-67.9027	-18.5894	Other alpine regions
f184	ERR4553346	PRJEB40002	51307	1001	SAMEA7230659	2017-07-23	Illumina MiSeq	Sweden	Europe		SAMEA7230659	ice	SAMEA7230659	-67.9027	-18.5894	Other alpine regions
f185	ERR4553347	PRJEB40002	85364	332	SAMEA7230660	2017-07-23	Illumina MiSeq	Sweden	Europe		SAMEA7230660	ice	SAMEA7230660	-67.9027	-18.5894	Other alpine regions
f186	ERR4553348	PRJEB40002	124542	704	SAMEA7230661	2017-07-23	Illumina MiSeq	Sweden	Europe		SAMEA7230661	ice	SAMEA7230661	-67.9027	-18.5894	Other alpine regions
f187	ERR4553349	PRJEB40002	101346	932	SAMEA7230662	2017-07-23	Illumina MiSeq	Sweden	Europe		SAMEA7230662	ice	SAMEA7230662	-67.9027	-18.5894	Other alpine regions
f188	ERR4553350	PRJEB40002	64393	1322	SAMEA7230663	2017-07-23	Illumina MiSeq	Sweden	Europe		SAMEA7230663	ice	SAMEA7230663	-67.9027	-18.5894	Other alpine regions
f189	ERR4553351	PRJEB40002	58094	578	SAMEA7230664	2017-07-23	Illumina MiSeq	Sweden	Europe		SAMEA7230664	ice	SAMEA7230664	-67.9027	-18.5894	Other alpine regions
f190	ERR4553352	PRJEB40002	68913	715	SAMEA7230665	2017-07-23	Illumina MiSeq	Sweden	Europe		SAMEA7230665	ice	SAMEA7230665	-67.9027	-18.5894	Other alpine regions
f191	ERR4553353	PRJEB40002	134609	191	SAMEA7230666	2017-07-23	Illumina MiSeq	Sweden	Europe		SAMEA7230666	ice	SAMEA7230666	-67.9027	-18.5894	Other alpine regions
f154	ERR4553316	PRJEB40002	73405	961	SAMEA7230629	2017-07-20	Illumina MiSeq	Sweden	Europe		SAMEA7230629	ice	SAMEA7230629	-67.901	-18.5804	Other alpine regions
f155	ERR4553317	PRJEB40002	82382	1638	SAMEA7230630	2017-07-20	Illumina MiSeq	Sweden	Europe		SAMEA7230630	ice	SAMEA7230630	-67.901	-18.5804	Other alpine regions
f156	ERR4553318	PRJEB40002	128933	1443	SAMEA7230631	2017-07-20	Illumina MiSeq	Sweden	Europe		SAMEA7230631	ice	SAMEA7230631	-67.901	-18.5804	Other alpine regions
f157	ERR4553319	PRJEB40002	92243	332	SAMEA7230632	2017-07-20	Illumina MiSeq	Sweden	Europe		SAMEA7230632	ice	SAMEA7230632	-67.901	-18.5804	Other alpine regions
f145	ERR4553307	PRJEB40002	5048	332	SAMEA7230620	2017-07-19	Illumina MiSeq	Sweden	Europe		SAMEA7230620	ice	SAMEA7230620	-67.9008	-18.5804	Other alpine regions
f146	ERR4553308	PRJEB40002	84244	1683	SAMEA7230621	2017-07-19	Illumina MiSeq	Sweden	Europe		SAMEA7230621	ice	SAMEA7230621	-67.9008	-18.5804	Other alpine regions
f147	ERR4553309	PRJEB40002	65134	1197	SAMEA7230622	2017-07-19	Illumina MiSeq	Sweden	Europe		SAMEA7230622	ice	SAMEA7230622	-67.9008	-18.5804	Other alpine regions
f148	ERR4553310	PRJEB40002	76730	573	SAMEA7230623	2017-07-19	Illumina MiSeq	Sweden	Europe		SAMEA7230623	ice	SAMEA7230623	-67.9008	-18.5804	Other alpine regions
f149	ERR4553311	PRJEB40002	116614	2257	SAMEA7230624	2017-07-19	Illumina MiSeq	Sweden	Europe		SAMEA7230624	ice	SAMEA7230624	-67.9008	-18.5804	Other alpine regions
f150	ERR4553312	PRJEB40002	70270	1443	SAMEA7230625	2017-07-19	Illumina MiSeq	Sweden	Europe		SAMEA7230625	ice	SAMEA7230625	-67.9008	-18.5804	Other alpine regions
f151	ERR4553313	PRJEB40002	87538	1216	SAMEA7230626	2017-07-19	Illumina MiSeq	Sweden	Europe		SAMEA7230626	ice	SAMEA7230626	-67.9008	-18.5804	Other alpine regions
f152	ERR4553314	PRJEB40002	103918	1155	SAMEA7230627	2017-07-19	Illumina MiSeq	Sweden	Europe		SAMEA7230627	ice	SAMEA7230627	-67.9008	-18.5804	Other alpine regions
f153	ERR4553315	PRJEB40002	498459	722	SAMEA7230628	2017-07-19	Illumina MiSeq	Sweden	Europe		SAMEA7230628	ice	SAMEA7230628	-67.9008	-18.5804	Other alpine regions
f137	ERR4553299	PRJEB40002	67496	2148	SAMEA7230612	2017-07-20	Illumina MiSeq	Sweden	Europe		SAMEA7230612	ice	SAMEA7230612	-67.9008	-18.5803	Other alpine regions
f138	ERR4553300	PRJEB40002	76954	1467	SAMEA7230613	2017-07-20	Illumina MiSeq	Sweden	Europe		SAMEA7230613	ice	SAMEA7230613	-67.9008	-18.5803	Other alpine regions
f139	ERR4553301	PRJEB40002	26705	424	SAMEA7230614	2017-07-20	Illumina MiSeq	Sweden	Europe		SAMEA7230614	ice	SAMEA7230614	-67.9008	-18.5803	Other alpine regions
f140	ERR4553302	PRJEB40002	59859	2004	SAMEA7230615	2017-07-20	Illumina MiSeq	Sweden	Europe		SAMEA7230615	ice	SAMEA7230615	-67.9008	-18.5803	Other alpine regions
f141	ERR4553303	PRJEB40002	62920	1553	SAMEA7230616	2017-07-20	Illumina MiSeq	Sweden	Europe		SAMEA7230616	ice	SAMEA7230616	-67.9008	-18.5803	Other alpine regions
f142	ERR4553304	PRJEB40002	40907	1166	SAMEA7230617	2017-07-20	Illumina MiSeq	Sweden	Europe		SAMEA7230617	ice	SAMEA7230617	-67.9008	-18.5803	Other alpine regions
f143	ERR4553305	PRJEB40002	18331	379	SAMEA7230618	2017-07-20	Illumina MiSeq	Sweden	Europe		SAMEA7230618	ice	SAMEA7230618	-67.9008	-18.5803	Other alpine regions
f144	ERR4553306	PRJEB40002	44332	909	SAMEA7230619	2017-07-20	Illumina MiSeq	Sweden	Europe		SAMEA7230619	ice	SAMEA7230619	-67.9008	-18.5803	Other alpine regions
f132	ERR4553294	PRJEB40002	65183	1571	SAMEA7230607	2017-07-20	Illumina MiSeq	Sweden	Europe		SAMEA7230607	ice	SAMEA7230607	-67.9007	-18.5799	Other alpine regions
f133	ERR4553295	PRJEB40002	65449	1389	SAMEA7230608	2017-07-20	Illumina MiSeq	Sweden	Europe		SAMEA7230608	ice	SAMEA7230608	-67.9007	-18.5799	Other alpine regions
f134	ERR4553296	PRJEB40002	54776	649	SAMEA7230609	2017-07-20	Illumina MiSeq	Sweden	Europe		SAMEA7230609	ice	SAMEA7230609	-67.9007	-18.5799	Other alpine regions
f135	ERR4553297	PRJEB40002	46938	1629	SAMEA7230610	2017-07-20	Illumina MiSeq	Sweden	Europe		SAMEA7230610	ice	SAMEA7230610	-67.9007	-18.5799	Other alpine regions
f136	ERR4553298	PRJEB40002	34083	408	SAMEA7230611	2017-07-20	Illumina MiSeq	Sweden	Europe		SAMEA7230611	ice	SAMEA7230611	-67.9007	-18.5799	Other alpine regions
f858	SRR27784617	PRJNA1071093	17390	701	SAMN39671632	2018-01-01	Illumina MiSeq	uncalculated	uncalculated	Antarctica: Taylor Valley	SAMN39671632	Ice	SAMN39671632	-77.6101	162.955	Antarctic
f906	SRR28435702	PRJNA1090395	25649	146	SAMN40563670	2022-02-05	Illumina MiSeq	uncalculated	Antarctica	The Dalk Glacier in Antarctica	SAMN40563670	ice	SAMN40563670	-69	76	Antarctic
f1242	SRR3667360	PRJNA322651	37021	773	SAMN05179490	2009-12-08	Illumina MiSeq	uncalculated	Antarctica	Canada Glacier Ice3	SAMN05179490	ice	SAMN05179490	-77.6156	162.971	Antarctic
f1243	SRR3667361	PRJNA322651	23850	381	SAMN05179491	2009-12-12	Illumina MiSeq	uncalculated	Antarctica	Canada Glacier Ice4	SAMN05179491	ice	SAMN05179491	-77.6156	162.971	Antarctic
f1245	SRR3667375	PRJNA322651	41022	674	SAMN05179501	2009-12-09	Illumina MiSeq	uncalculated	Antarctica	Cotton Glacier Ice1	SAMN05179501	ice	SAMN05179501	-77.1167	161.667	Antarctic
f1246	SRR3667376	PRJNA322651	32230	879	SAMN05179502	2009-12-09	Illumina MiSeq	uncalculated	Antarctica	Cotton Glacier Ice2	SAMN05179502	ice	SAMN05179502	-77.1167	161.667	Antarctic
f1247	SRR3667377	PRJNA322651	24896	1080	SAMN05179503	2012-01-10	Illumina MiSeq	uncalculated	Antarctica	Cotton Glacier Ice3	SAMN05179503	ice	SAMN05179503	-77.1167	161.667	Antarctic
f1248	SRR3667378	PRJNA322651	42780	429	SAMN05179504	2012-01-10	Illumina MiSeq	uncalculated	Antarctica	Cotton Glacier Ice4	SAMN05179504	ice	SAMN05179504	-77.1167	161.667	Antarctic
f1249	SRR3667379	PRJNA322651	31027	1126	SAMN05179505	2012-01-10	Illumina MiSeq	uncalculated	Antarctica	Cotton Glacier Ice5	SAMN05179505	ice	SAMN05179505	-77.1167	161.667	Antarctic
PRJNA480849Sample350	SRR17375820	PRJNA480849	7312	282	SAMN24469119	2016-11-01	Illumina MiSeq	uncalculated	uncalculated	Antarctica: Taylor Valley	SAMN24469119	Ice	SAMN24469119	-77.7424	162.113	Antarctic
PRJNA480849Sample66	SRR17376062	PRJNA480849	9869	404	SAMN24469128	2016-11-01	Illumina MiSeq	uncalculated	uncalculated	Antarctica: Taylor Valley	SAMN24469128	Ice	SAMN24469128	-77.7406	162.116	Antarctic
f400	SRR12805395	PRJNA668398	15398	708	SAMN16408940	2017-12-01	Illumina MiSeq	uncalculated	uncalculated	Antarctica: Taylor Valley	SAMN16408940	Ice	SAMN16408940	-77.6191	162.937	Antarctic
f1117	SRR15808168	PRJNA758809	50066	562	SAMN21036745	2018-01-16	Illumina MiSeq	uncalculated	uncalculated	Antarctica	SAMN21036745	ice	SAMN21036745	-62.9353	-60.5562	Antarctic
f1119	SRR15808170	PRJNA758809	55686	666	SAMN21036741	2018-01-16	Illumina MiSeq	uncalculated	uncalculated	Antarctica	SAMN21036741	ice	SAMN21036741	-62.9353	-60.5562	Antarctic
PRJNA825340Sample10	SRR18739304	PRJNA825340	37330	1431	SAMN27512304	2013	Illumina MiSeq	uncalculated	uncalculated	Antarctica	SAMN27512304	Ice	SAMN27512304	-70.2556	72.5483	Antarctic
f1432	SRR7511395	PRJNA480048	47863	1614	SAMN09625563	2015-08-01	Illumina MiSeq	USA	North America	USA: Wyoming\, Grand Teton National Park\, South Cascade Creek	SAMN09625563	ice	SAMN09625563	43.7217	-110.838	Other alpine regions
f1438	SRR7511427	PRJNA480048	23561	919	SAMN09625567	2015-08-01	Illumina MiSeq	USA	North America	USA: Wyoming\, Grand Teton National Park\, Middle Teton Glacier	SAMN09625567	ice	SAMN09625567	43.7277	-110.795	Other alpine regions
f1433	SRR7511401	PRJNA480048	30409	583	SAMN09625576	2015-08-01	Illumina MiSeq	USA	North America	USA: Wyoming\, Teton Range\, North Fork of Teton Creek	SAMN09625576	ice	SAMN09625576	43.7774	-110.859	Other alpine regions
f1431	SRR7511392	PRJNA480048	29153	1016	SAMN09625558	2015-08-01	Illumina MiSeq	USA	North America	USA: Wyoming\, Grand Teton National Park\, Petersen Glacier	SAMN09625558	ice	SAMN09625558	43.7818	-110.846	Other alpine regions
f1436	SRR7511411	PRJNA480048	33429	876	SAMN09625600	2015-08-01	Illumina MiSeq	USA	North America	USA: Montana\, Glacier National Park\, Sperry Glacier	SAMN09625600	ice	SAMN09625600	48.6259	-113.763	Other alpine regions
f1434	SRR7511405	PRJNA480048	32586	848	SAMN09625580	2015-08-01	Illumina MiSeq	USA	North America	USA: Montana\, Glacier National Park\, Clements Creek	SAMN09625580	ice	SAMN09625580	48.6899	-113.734	Other alpine regions
f1437	SRR7511422	PRJNA480048	24606	963	SAMN09625590	2015-08-01	Illumina MiSeq	USA	North America	USA: Montana\, Glacier National Park\, Lunch Creek	SAMN09625590	ice	SAMN09625590	48.7068	-113.704	Other alpine regions
f1435	SRR7511407	PRJNA480048	21802	984	SAMN09625596	2015-08-01	Illumina MiSeq	USA	North America	USA: Montana\, Glacier National Park\, Grinnell Glacier	SAMN09625596	ice	SAMN09625596	48.7603	-113.725	Other alpine regions
f430	SRR13069535	PRJNA678168	14196	347	SAMN16789404	2016-05-01	Illumina MiSeq	Iceland	Europe	Iceland: Kvarjkull glacier	SAMN16789404	debris band	SAMN16789404	63.943	-17.0014	Arctic
f431	SRR13069536	PRJNA678168	8556	106	SAMN16789402	2016-05-01	Illumina MiSeq	Iceland	Europe	Iceland: Kvarjkull glacier	SAMN16789402	debris band	SAMN16789402	63.9431	-17.0003	Arctic
f432	SRR13069537	PRJNA678168	15740	237	SAMN16789400	2016-05-01	Illumina MiSeq	Iceland	Europe	Iceland: Svnafellsjokull glacier	SAMN16789400	debris band	SAMN16789400	63.9915	-16.8724	Arctic
f438	SRR13069543	PRJNA678168	12585	425	SAMN16789390	2015-04-01	Illumina MiSeq	Iceland	Europe	Iceland: Svnafellsjokull glacier	SAMN16789390	debris band	SAMN16789390	63.9965	-16.878	Arctic
f434	SRR13069539	PRJNA678168	14985	7	SAMN16789398	2016-05-01	Illumina MiSeq	Iceland	Europe	Iceland: Svnafellsjokull glacier	SAMN16789398	debris band	SAMN16789398	63.9988	-16.8764	Arctic
f435	SRR13069540	PRJNA678168	12024	223	SAMN16789396	2016-05-01	Illumina MiSeq	Iceland	Europe	Iceland: Svnafellsjokull glacier	SAMN16789396	debris band	SAMN16789396	63.9988	-16.8764	Arctic
PRJNA884890Sample57	SRR21738772	PRJNA884890	35318	999	SAMN31029984	2001	Illumina MiSeq	China	Asia	China: Tibetan Plateau	SAMN31029984	ice core	SAMN31029984	38.283	-75.1	Tibetan Plateau
PRJNA884890Sample1	SRR21738733	PRJNA884890	27187	1025	SAMN31030019	2001	Illumina MiSeq	China	Asia	China: Tibetan Plateau	SAMN31030019	ice core	SAMN31030019	38.2831	-75.1002	Tibetan Plateau
PRJNA884890Sample11	SRR21738750	PRJNA884890	46721	843	SAMN31030004	2001	Illumina MiSeq	China	Asia	China: Tibetan Plateau	SAMN31030004	ice core	SAMN31030004	38.2831	-75.1117	Tibetan Plateau
PRJNA884890Sample19	SRR21738751	PRJNA884890	26636	833	SAMN31030003	2001	Illumina MiSeq	China	Asia	China: Tibetan Plateau	SAMN31030003	ice core	SAMN31030003	38.2831	-75.1118	Tibetan Plateau
PRJNA884890Sample27	SRR21738752	PRJNA884890	26173	859	SAMN31030002	2001	Illumina MiSeq	China	Asia	China: Tibetan Plateau	SAMN31030002	ice core	SAMN31030002	38.2831	-75.1119	Tibetan Plateau
PRJNA884890Sample34	SRR21738753	PRJNA884890	47439	1133	SAMN31030001	2001	Illumina MiSeq	China	Asia	China: Tibetan Plateau	SAMN31030001	ice core	SAMN31030001	38.2831	-75.1115	Tibetan Plateau
PRJNA884890Sample41	SRR21738754	PRJNA884890	50816	1345	SAMN31030000	2001	Illumina MiSeq	China	Asia	China: Tibetan Plateau	SAMN31030000	ice core	SAMN31030000	38.2831	-75.1116	Tibetan Plateau
PRJNA884890Sample48	SRR21738755	PRJNA884890	38085	1060	SAMN31029999	2001	Illumina MiSeq	China	Asia	China: Tibetan Plateau	SAMN31029999	ice core	SAMN31029999	38.2831	-75.1114	Tibetan Plateau
PRJNA884890Sample55	SRR21738756	PRJNA884890	24411	851	SAMN31029998	2001	Illumina MiSeq	China	Asia	China: Tibetan Plateau	SAMN31029998	ice core	SAMN31029998	38.2831	-75.1113	Tibetan Plateau
PRJNA884890Sample4	SRR21738757	PRJNA884890	23257	766	SAMN31029997	2001	Illumina MiSeq	China	Asia	China: Tibetan Plateau	SAMN31029997	ice core	SAMN31029997	38.2831	-75.1112	Tibetan Plateau
PRJNA884890Sample12	SRR21738758	PRJNA884890	23914	436	SAMN31029996	2001	Illumina MiSeq	China	Asia	China: Tibetan Plateau	SAMN31029996	ice core	SAMN31029996	38.2831	-75.1111	Tibetan Plateau
PRJNA884890Sample20	SRR21738759	PRJNA884890	20979	558	SAMN31029995	2001	Illumina MiSeq	China	Asia	China: Tibetan Plateau	SAMN31029995	ice core	SAMN31029995	38.2831	-75.111	Tibetan Plateau
PRJNA884890Sample7	SRR21738781	PRJNA884890	45162	773	SAMN31029975	2001	Illumina MiSeq	China	Asia	China: Tibetan Plateau	SAMN31029975	ice core	SAMN31029975	38.2831	-75.1	Tibetan Plateau
PRJNA884890Sample38	SRR21738730	PRJNA884890	31541	514	SAMN31030022	2001	Illumina MiSeq	China	Asia	China: Tibetan Plateau	SAMN31030022	ice core	SAMN31030022	38.2832	-75.1002	Tibetan Plateau
PRJNA884890Sample17	SRR21738735	PRJNA884890	24499	528	SAMN31030017	2001	Illumina MiSeq	China	Asia	China: Tibetan Plateau	SAMN31030017	ice core	SAMN31030017	38.2832	-75.1003	Tibetan Plateau
PRJNA884890Sample35	SRR21738761	PRJNA884890	25913	537	SAMN31029994	2001	Illumina MiSeq	China	Asia	China: Tibetan Plateau	SAMN31029994	ice core	SAMN31029994	38.2832	-75.1209	Tibetan Plateau
PRJNA884890Sample42	SRR21738762	PRJNA884890	26571	1296	SAMN31029993	2001	Illumina MiSeq	China	Asia	China: Tibetan Plateau	SAMN31029993	ice core	SAMN31029993	38.2832	-75.1208	Tibetan Plateau
PRJNA884890Sample49	SRR21738763	PRJNA884890	25063	1310	SAMN31029992	2001	Illumina MiSeq	China	Asia	China: Tibetan Plateau	SAMN31029992	ice core	SAMN31029992	38.2832	-75.1207	Tibetan Plateau
PRJNA884890Sample56	SRR21738764	PRJNA884890	18966	201	SAMN31029991	2001	Illumina MiSeq	China	Asia	China: Tibetan Plateau	SAMN31029991	ice core	SAMN31029991	38.2832	-75.1206	Tibetan Plateau
PRJNA884890Sample5	SRR21738765	PRJNA884890	53612	1483	SAMN31029990	2001	Illumina MiSeq	China	Asia	China: Tibetan Plateau	SAMN31029990	ice core	SAMN31029990	38.2832	-75.1205	Tibetan Plateau
PRJNA884890Sample13	SRR21738766	PRJNA884890	38907	1745	SAMN31029989	2001	Illumina MiSeq	China	Asia	China: Tibetan Plateau	SAMN31029989	ice core	SAMN31029989	38.2832	-75.1204	Tibetan Plateau
PRJNA884890Sample21	SRR21738767	PRJNA884890	19826	246	SAMN31029988	2001	Illumina MiSeq	China	Asia	China: Tibetan Plateau	SAMN31029988	ice core	SAMN31029988	38.2832	-75.1203	Tibetan Plateau
PRJNA884890Sample29	SRR21738768	PRJNA884890	47470	1715	SAMN31029987	2001	Illumina MiSeq	China	Asia	China: Tibetan Plateau	SAMN31029987	ice core	SAMN31029987	38.2832	-75.1202	Tibetan Plateau
PRJNA884890Sample36	SRR21738769	PRJNA884890	45458	1474	SAMN31029986	2001	Illumina MiSeq	China	Asia	China: Tibetan Plateau	SAMN31029986	ice core	SAMN31029986	38.2832	-75.1201	Tibetan Plateau
PRJNA884890Sample43	SRR21738770	PRJNA884890	43225	910	SAMN31029985	2001	Illumina MiSeq	China	Asia	China: Tibetan Plateau	SAMN31029985	ice core	SAMN31029985	38.2832	-75.12	Tibetan Plateau
PRJNA884890Sample30	SRR21738776	PRJNA884890	43369	1210	SAMN31029980	2001	Illumina MiSeq	China	Asia	China: Tibetan Plateau	SAMN31029980	ice core	SAMN31029980	38.2832	-75.1	Tibetan Plateau
PRJNA884890Sample8	SRR21738726	PRJNA884890	46700	1443	SAMN31029974	2001	Illumina MiSeq	China	Asia	China: Tibetan Plateau	SAMN31029974	ice core	SAMN31029974	38.2833	-75.1009	Tibetan Plateau
PRJNA884890Sample16	SRR21738727	PRJNA884890	23843	1183	SAMN31029973	2001	Illumina MiSeq	China	Asia	China: Tibetan Plateau	SAMN31029973	ice core	SAMN31029973	38.2833	-75.1008	Tibetan Plateau
PRJNA884890Sample24	SRR21738728	PRJNA884890	30567	1009	SAMN31029972	2001	Illumina MiSeq	China	Asia	China: Tibetan Plateau	SAMN31029972	ice core	SAMN31029972	38.2833	-75.1013	Tibetan Plateau
PRJNA884890Sample31	SRR21738729	PRJNA884890	28862	1277	SAMN31029971	2001	Illumina MiSeq	China	Asia	China: Tibetan Plateau	SAMN31029971	ice core	SAMN31029971	38.2833	-75.1016	Tibetan Plateau
PRJNA884890Sample32	SRR21738737	PRJNA884890	25512	649	SAMN31030015	2001	Illumina MiSeq	China	Asia	China: Tibetan Plateau	SAMN31030015	ice core	SAMN31030015	38.2833	-75.1012	Tibetan Plateau
PRJNA884890Sample39	SRR21738738	PRJNA884890	28211	1001	SAMN31029970	2001	Illumina MiSeq	China	Asia	China: Tibetan Plateau	SAMN31029970	ice core	SAMN31029970	38.2833	-75.1004	Tibetan Plateau
PRJNA884890Sample3	SRR21738749	PRJNA884890	33017	902	SAMN31029969	2001	Illumina MiSeq	China	Asia	China: Tibetan Plateau	SAMN31029969	ice core	SAMN31029969	38.2833	-75.1002	Tibetan Plateau
PRJNA884890Sample28	SRR21738760	PRJNA884890	33085	820	SAMN31029968	2001	Illumina MiSeq	China	Asia	China: Tibetan Plateau	SAMN31029968	ice core	SAMN31029968	38.2833	-75.1005	Tibetan Plateau
PRJNA884890Sample50	SRR21738771	PRJNA884890	52690	1462	SAMN31029967	2001	Illumina MiSeq	China	Asia	China: Tibetan Plateau	SAMN31029967	ice core	SAMN31029967	38.2833	-75.1003	Tibetan Plateau
PRJNA884890Sample15	SRR21738782	PRJNA884890	46858	1566	SAMN31029966	2001	Illumina MiSeq	China	Asia	China: Tibetan Plateau	SAMN31029966	ice core	SAMN31029966	38.2833	-75.1001	Tibetan Plateau
PRJNA884890Sample23	SRR21738783	PRJNA884890	34094	1173	SAMN31029965	2001	Illumina MiSeq	China	Asia	China: Tibetan Plateau	SAMN31029965	ice core	SAMN31029965	38.2833	-75.1	Tibetan Plateau
PRJNA884890Sample9	SRR21738734	PRJNA884890	43840	1396	SAMN31030018	2001	Illumina MiSeq	China	Asia	China: Tibetan Plateau	SAMN31030018	ice core	SAMN31030018	38.2834	-75.1002	Tibetan Plateau
PRJNA884890Sample46	SRR21738739	PRJNA884890	19958	971	SAMN31030014	2001	Illumina MiSeq	China	Asia	China: Tibetan Plateau	SAMN31030014	ice core	SAMN31030014	38.2834	-75.1019	Tibetan Plateau
PRJNA884890Sample53	SRR21738740	PRJNA884890	46384	869	SAMN31030013	2001	Illumina MiSeq	China	Asia	China: Tibetan Plateau	SAMN31030013	ice core	SAMN31030013	38.2834	-75.1018	Tibetan Plateau
PRJNA884890Sample2	SRR21738741	PRJNA884890	40119	2080	SAMN31030012	2001	Illumina MiSeq	China	Asia	China: Tibetan Plateau	SAMN31030012	ice core	SAMN31030012	38.2834	-75.1017	Tibetan Plateau
PRJNA884890Sample10	SRR21738742	PRJNA884890	38228	1492	SAMN31030011	2001	Illumina MiSeq	China	Asia	China: Tibetan Plateau	SAMN31030011	ice core	SAMN31030011	38.2834	-75.1016	Tibetan Plateau
PRJNA884890Sample18	SRR21738743	PRJNA884890	26419	578	SAMN31030010	2001	Illumina MiSeq	China	Asia	China: Tibetan Plateau	SAMN31030010	ice core	SAMN31030010	38.2834	-75.1015	Tibetan Plateau
PRJNA884890Sample26	SRR21738744	PRJNA884890	27989	1316	SAMN31030009	2001	Illumina MiSeq	China	Asia	China: Tibetan Plateau	SAMN31030009	ice core	SAMN31030009	38.2834	-75.1014	Tibetan Plateau
PRJNA884890Sample33	SRR21738745	PRJNA884890	17433	1911	SAMN31030008	2001	Illumina MiSeq	China	Asia	China: Tibetan Plateau	SAMN31030008	ice core	SAMN31030008	38.2834	-75.1013	Tibetan Plateau
PRJNA884890Sample40	SRR21738746	PRJNA884890	38290	1002	SAMN31030007	2001	Illumina MiSeq	China	Asia	China: Tibetan Plateau	SAMN31030007	ice core	SAMN31030007	38.2834	-75.1012	Tibetan Plateau
PRJNA884890Sample47	SRR21738747	PRJNA884890	21850	853	SAMN31030006	2001	Illumina MiSeq	China	Asia	China: Tibetan Plateau	SAMN31030006	ice core	SAMN31030006	38.2834	-75.1011	Tibetan Plateau
PRJNA884890Sample54	SRR21738748	PRJNA884890	37654	636	SAMN31030005	2001	Illumina MiSeq	China	Asia	China: Tibetan Plateau	SAMN31030005	ice core	SAMN31030005	38.2834	-75.101	Tibetan Plateau
PRJNA884890Sample44	SRR21738778	PRJNA884890	43870	838	SAMN31029978	2001	Illumina MiSeq	China	Asia	China: Tibetan Plateau	SAMN31029978	ice core	SAMN31029978	38.2834	-75.1	Tibetan Plateau
PRJNA884890Sample25	SRR21738736	PRJNA884890	30392	1628	SAMN31030016	2001	Illumina MiSeq	China	Asia	China: Tibetan Plateau	SAMN31030016	ice core	SAMN31030016	38.2835	-75.1002	Tibetan Plateau
PRJNA884890Sample37	SRR21738777	PRJNA884890	40838	1193	SAMN31029979	2001	Illumina MiSeq	China	Asia	China: Tibetan Plateau	SAMN31029979	ice core	SAMN31029979	38.2835	-75.1	Tibetan Plateau
PRJNA884890Sample52	SRR21738732	PRJNA884890	30594	1156	SAMN31030020	2001	Illumina MiSeq	China	Asia	China: Tibetan Plateau	SAMN31030020	ice core	SAMN31030020	38.2836	-75.1002	Tibetan Plateau
PRJNA884890Sample51	SRR21738779	PRJNA884890	44483	899	SAMN31029977	2001	Illumina MiSeq	China	Asia	China: Tibetan Plateau	SAMN31029977	ice core	SAMN31029977	38.2836	-75.1	Tibetan Plateau
PRJNA884890Sample22	SRR21738775	PRJNA884890	59403	1311	SAMN31029981	2001	Illumina MiSeq	China	Asia	China: Tibetan Plateau	SAMN31029981	ice core	SAMN31029981	38.2837	-75.1	Tibetan Plateau
PRJNA884890Sample14	SRR21738774	PRJNA884890	44096	661	SAMN31029982	2001	Illumina MiSeq	China	Asia	China: Tibetan Plateau	SAMN31029982	ice core	SAMN31029982	38.2838	-75.1	Tibetan Plateau
PRJNA884890Sample58	SRR21738780	PRJNA884890	43852	1254	SAMN31029976	2001	Illumina MiSeq	China	Asia	China: Tibetan Plateau	SAMN31029976	ice core	SAMN31029976	38.2838	-75.1001	Tibetan Plateau
PRJNA884890Sample45	SRR21738731	PRJNA884890	33011	1164	SAMN31030021	2001	Illumina MiSeq	China	Asia	China: Tibetan Plateau	SAMN31030021	ice core	SAMN31030021	38.2839	-75.1002	Tibetan Plateau
PRJNA884890Sample6	SRR21738773	PRJNA884890	38157	755	SAMN31029983	2001	Illumina MiSeq	China	Asia	China: Tibetan Plateau	SAMN31029983	ice core	SAMN31029983	38.2839	-75.1	Tibetan Plateau
f767	SRR26700032	PRJNA1036571	15594	1049	SAMN38142863	2019-07/2019-08	Illumina MiSeq	Svalbard	Europe	Svalbard: Foxfonna	SAMN38142863	ice core	SAMN38142863	78.143	16.149	Other alpine regions
f768	SRR26700033	PRJNA1036571	43439	1520	SAMN38142862	2019-07/2019-08	Illumina MiSeq	Svalbard	Europe	Svalbard: Foxfonna	SAMN38142862	ice core	SAMN38142862	78.143	16.149	Other alpine regions
f769	SRR26700047	PRJNA1036571	44318	1495	SAMN38142849	2019-07/2019-08	Illumina MiSeq	Svalbard	Europe	Svalbard: Foxfonna	SAMN38142849	ice core	SAMN38142849	78.143	16.149	Other alpine regions
f770	SRR26700050	PRJNA1036571	20446	904	SAMN38142847	2019-07/2019-08	Illumina MiSeq	Svalbard	Europe	Svalbard: Foxfonna	SAMN38142847	ice core	SAMN38142847	78.143	16.149	Other alpine regions
f771	SRR26700051	PRJNA1036571	21984	980	SAMN38142846	2019-07/2019-08	Illumina MiSeq	Svalbard	Europe	Svalbard: Foxfonna	SAMN38142846	ice core	SAMN38142846	78.143	16.149	Other alpine regions
f775	SRR26700059	PRJNA1036571	20319	786	SAMN38142812	2019-07/2019-08	Illumina MiSeq	Svalbard	Europe	Svalbard: Foxfonna	SAMN38142812	ice core	SAMN38142812	78.143	16.149	Other alpine regions
f778	SRR26700070	PRJNA1036571	5470	420	SAMN38142811	2019-07/2019-08	Illumina MiSeq	Svalbard	Europe	Svalbard: Foxfonna	SAMN38142811	ice core	SAMN38142811	78.143	16.149	Other alpine regions
f779	SRR26700071	PRJNA1036571	21040	948	SAMN38142828	2019-07/2019-08	Illumina MiSeq	Svalbard	Europe	Svalbard: Foxfonna	SAMN38142828	ice core	SAMN38142828	78.143	16.149	Other alpine regions
f780	SRR26700072	PRJNA1036571	34805	1529	SAMN38142827	2019-07/2019-08	Illumina MiSeq	Svalbard	Europe	Svalbard: Foxfonna	SAMN38142827	ice core	SAMN38142827	78.143	16.149	Other alpine regions
f781	SRR26700073	PRJNA1036571	18182	766	SAMN38142826	2019-07/2019-08	Illumina MiSeq	Svalbard	Europe	Svalbard: Foxfonna	SAMN38142826	ice core	SAMN38142826	78.143	16.149	Other alpine regions
f782	SRR26700074	PRJNA1036571	20490	854	SAMN38142825	2019-07/2019-08	Illumina MiSeq	Svalbard	Europe	Svalbard: Foxfonna	SAMN38142825	ice core	SAMN38142825	78.143	16.149	Other alpine regions
f786	SRR26700104	PRJNA1036571	19141	990	SAMN38142865	2019-07/2019-08	Illumina MiSeq	Svalbard	Europe	Svalbard: Foxfonna	SAMN38142865	ice core	SAMN38142865	78.143	16.149	Other alpine regions
f787	SRR26700105	PRJNA1036571	49437	1760	SAMN38142864	2019-07/2019-08	Illumina MiSeq	Svalbard	Europe	Svalbard: Foxfonna	SAMN38142864	ice core	SAMN38142864	78.143	16.149	Other alpine regions
f789	SRR26700107	PRJNA1036571	34742	1400	SAMN38142810	2019-07/2019-08	Illumina MiSeq	Svalbard	Europe	Svalbard: Foxfonna	SAMN38142810	ice core	SAMN38142810	78.143	16.149	Other alpine regions
f790	SRR26700108	PRJNA1036571	36807	1145	SAMN38142809	2019-07/2019-08	Illumina MiSeq	Svalbard	Europe	Svalbard: Foxfonna	SAMN38142809	ice core	SAMN38142809	78.143	16.149	Other alpine regions
PRJNA564214Sample47	SRR10080806	PRJNA564214	7318	287	SAMN12705717	2017-06-07	Illumina MiSeq	Greenland	North America	Greenland	SAMN12705717	Clean snow	SAMN12705717	67.2536	-49.5039	Arctic
PRJNA564214Sample16	SRR10080804	PRJNA564214	25912	478	SAMN12705719	2017-06-10	Illumina MiSeq	Greenland	North America	Greenland	SAMN12705719	Clean snow	SAMN12705719	67.2592	-49.5	Arctic
PRJNA564214Sample56	SRR10080805	PRJNA564214	34418	395	SAMN12705718	2017-06-08	Illumina MiSeq	Greenland	North America	Greenland	SAMN12705718	Clean snow	SAMN12705718	67.2592	-49.4994	Arctic
PRJNA636650Sample10	SRR11917317	PRJNA636650	74119	1994	SAMN15082931	2013-03-12	Illumina MiSeq	uncalculated	uncalculated	Antarctica: Signy Island	SAMN15082931	Gourlay_mid_snowpack	SAMN15082931	-60.72	-45.62	Antarctic
PRJNA636650Sample3	SRR11917319	PRJNA636650	36895	1870	SAMN15082928	2013-02-15	Illumina MiSeq	uncalculated	uncalculated	Antarctica: Signy Island	SAMN15082928	Gourlay_mid_snowpack	SAMN15082928	-60.72	-45.62	Antarctic
PRJNA636650Sample16	SRR11917341	PRJNA636650	68890	1210	SAMN15082925	2013-01-13	Illumina MiSeq	uncalculated	uncalculated	Antarctica: Signy Island	SAMN15082925	Gourlay_mid_snowpack	SAMN15082925	-60.72	-45.62	Antarctic
PRJNA636650Sample22	SRR11917355	PRJNA636650	49460	1609	SAMN15082950	2013-02-15	Illumina MiSeq	uncalculated	uncalculated	Antarctica: Signy Island	SAMN15082950	Gourlay_mid_snowpack	SAMN15082950	-60.72	-45.62	Antarctic
PRJNA636650Sample18	SRR11917358	PRJNA636650	78350	3480	SAMN15082947	2013-01-13	Illumina MiSeq	uncalculated	uncalculated	Antarctica: Signy Island	SAMN15082947	Gourlay_mid_snowpack	SAMN15082947	-60.72	-45.62	Antarctic
PRJNA636650Sample13	SRR11917361	PRJNA636650	90249	931	SAMN15082944	2012-12-13	Illumina MiSeq	uncalculated	uncalculated	Antarctica: Signy Island	SAMN15082944	Gourlay_mid_snowpack	SAMN15082944	-60.72	-45.62	Antarctic
PRJNA636650Sample26	SRR11917365	PRJNA636650	34832	2864	SAMN15082941	2013-03-12	Illumina MiSeq	uncalculated	uncalculated	Antarctica: Signy Island	SAMN15082941	Gourlay_mid_snowpack	SAMN15082941	-60.72	-45.62	Antarctic
PRJNA636650Sample8	SRR11917369	PRJNA636650	57039	1287	SAMN15082936	2013-01-13	Illumina MiSeq	uncalculated	uncalculated	Antarctica: Signy Island	SAMN15082936	Gourlay_mid_snowpack	SAMN15082936	-60.72	-45.62	Antarctic
PRJNA636650Sample29	SRR11917371	PRJNA636650	39429	2328	SAMN15082934	2012-12-13	Illumina MiSeq	uncalculated	uncalculated	Antarctica: Signy Island	SAMN15082934	Gourlay_mid_snowpack	SAMN15082934	-60.72	-45.62	Antarctic
PRJNA636650Sample17	SRR11917374	PRJNA636650	15609	918	SAMN15082922	2012-12-13	Illumina MiSeq	uncalculated	uncalculated	Antarctica: Signy Island	SAMN15082922	Gourlay_mid_snowpack	SAMN15082922	-60.72	-45.62	Antarctic
PRJNA636650Sample2	SRR11917318	PRJNA636650	134887	3383	SAMN15082929	2013-02-15	Illumina MiSeq	uncalculated	uncalculated	Antarctica: Signy Island	SAMN15082929	Gourlay_top_snowpack	SAMN15082929	-60.72	-45.62	Antarctic
PRJNA636650Sample11	SRR11917330	PRJNA636650	25589	2708	SAMN15082926	2013-01-13	Illumina MiSeq	uncalculated	uncalculated	Antarctica: Signy Island	SAMN15082926	Gourlay_top_snowpack	SAMN15082926	-60.72	-45.62	Antarctic
PRJNA636650Sample6	SRR11917351	PRJNA636650	48055	3774	SAMN15082954	2013-03-12	Illumina MiSeq	uncalculated	uncalculated	Antarctica: Signy Island	SAMN15082954	Gourlay_top_snowpack	SAMN15082954	-60.72	-45.62	Antarctic
PRJNA636650Sample25	SRR11917354	PRJNA636650	151325	2186	SAMN15082951	2013-02-15	Illumina MiSeq	uncalculated	uncalculated	Antarctica: Signy Island	SAMN15082951	Gourlay_top_snowpack	SAMN15082951	-60.72	-45.62	Antarctic
PRJNA636650Sample35	SRR11917357	PRJNA636650	54568	1163	SAMN15082948	2013-01-13	Illumina MiSeq	uncalculated	uncalculated	Antarctica: Signy Island	SAMN15082948	Gourlay_top_snowpack	SAMN15082948	-60.72	-45.62	Antarctic
PRJNA636650Sample5	SRR11917360	PRJNA636650	116774	2189	SAMN15082945	2012-12-13	Illumina MiSeq	uncalculated	uncalculated	Antarctica: Signy Island	SAMN15082945	Gourlay_top_snowpack	SAMN15082945	-60.72	-45.62	Antarctic
PRJNA636650Sample27	SRR11917363	PRJNA636650	27097	2068	SAMN15082923	2012-12-13	Illumina MiSeq	uncalculated	uncalculated	Antarctica: Signy Island	SAMN15082923	Gourlay_top_snowpack	SAMN15082923	-60.72	-45.62	Antarctic
PRJNA636650Sample32	SRR11917364	PRJNA636650	58659	4039	SAMN15082942	2013-03-12	Illumina MiSeq	uncalculated	uncalculated	Antarctica: Signy Island	SAMN15082942	Gourlay_top_snowpack	SAMN15082942	-60.72	-45.62	Antarctic
PRJNA636650Sample21	SRR11917366	PRJNA636650	64243	1167	SAMN15082939	2013-02-15	Illumina MiSeq	uncalculated	uncalculated	Antarctica: Signy Island	SAMN15082939	Gourlay_top_snowpack	SAMN15082939	-60.72	-45.62	Antarctic
PRJNA636650Sample30	SRR11917368	PRJNA636650	45752	2621	SAMN15082937	2013-01-13	Illumina MiSeq	uncalculated	uncalculated	Antarctica: Signy Island	SAMN15082937	Gourlay_top_snowpack	SAMN15082937	-60.72	-45.62	Antarctic
PRJNA636650Sample12	SRR11917373	PRJNA636650	68052	769	SAMN15082932	2012-12-13	Illumina MiSeq	uncalculated	uncalculated	Antarctica: Signy Island	SAMN15082932	Gourlay_top_snowpack	SAMN15082932	-60.72	-45.62	Antarctic
f759	SRR25621343	PRJNA997782	9606	2359	SAMN36689286	2022-10-30	Illumina NovaSeq 6000	Pakistan	Asia	Pakistan	SAMN36689286	ice/snow	SAMN36689286	35.46	77.04	Tibetan Plateau
f760	SRR25621344	PRJNA997782	11372	1473	SAMN36689286	2022-10-30	Illumina NovaSeq 6000	Pakistan	Asia	Pakistan	SAMN36689286	ice/snow	SAMN36689286	35.46	77.04	Tibetan Plateau
f761	SRR25621345	PRJNA997782	11240	1415	SAMN36689286	2022-10-30	Illumina NovaSeq 6000	Pakistan	Asia	Pakistan	SAMN36689286	ice/snow	SAMN36689286	35.46	77.04	Tibetan Plateau
f762	SRR25621346	PRJNA997782	20883	868	SAMN36689286	2022-10-30	Illumina NovaSeq 6000	Pakistan	Asia	Pakistan	SAMN36689286	ice/snow	SAMN36689286	35.46	77.04	Tibetan Plateau
f763	SRR25621347	PRJNA997782	11114	1380	SAMN36689286	2022-10-30	Illumina NovaSeq 6000	Pakistan	Asia	Pakistan	SAMN36689286	ice/snow	SAMN36689286	35.46	77.04	Tibetan Plateau
f764	SRR25621348	PRJNA997782	11331	1329	SAMN36689286	2022-10-30	Illumina NovaSeq 6000	Pakistan	Asia	Pakistan	SAMN36689286	ice/snow	SAMN36689286	35.46	77.04	Tibetan Plateau
f765	SRR25621349	PRJNA997782	8345	1150	SAMN36689286	2022-10-30	Illumina NovaSeq 6000	Pakistan	Asia	Pakistan	SAMN36689286	ice/snow	SAMN36689286	35.46	77.04	Tibetan Plateau
f766	SRR25621350	PRJNA997782	10129	1366	SAMN36689286	2022-10-30	Illumina NovaSeq 6000	Pakistan	Asia	Pakistan	SAMN36689286	ice/snow	SAMN36689286	35.46	77.04	Tibetan Plateau
PRJNA991501Sample42	SRR25194212	PRJNA991501	32800	155	SAMN36295733	2018-12-27	Illumina MiSeq	uncalculated	uncalculated	Antarctica: Concordia station	SAMN36295733	Ice/snow	SAMN36295733	-75.1	123.33	Antarctic
PRJNA991501Sample45	SRR25194213	PRJNA991501	45607	153	SAMN36295733	2018-12-27	Illumina MiSeq	uncalculated	uncalculated	Antarctica: Concordia station	SAMN36295733	Ice/snow	SAMN36295733	-75.1	123.33	Antarctic
PRJNA991501Sample63	SRR25194214	PRJNA991501	64659	659	SAMN36295733	2018-12-27	Illumina MiSeq	uncalculated	uncalculated	Antarctica: Concordia station	SAMN36295733	Ice/snow	SAMN36295733	-75.1	123.33	Antarctic
PRJNA991501Sample41	SRR25194215	PRJNA991501	26489	178	SAMN36295733	2018-12-27	Illumina MiSeq	uncalculated	uncalculated	Antarctica: Concordia station	SAMN36295733	Ice/snow	SAMN36295733	-75.1	123.33	Antarctic
PRJNA991501Sample64	SRR25194216	PRJNA991501	32094	233	SAMN36295733	2018-12-27	Illumina MiSeq	uncalculated	uncalculated	Antarctica: Concordia station	SAMN36295733	Ice/snow	SAMN36295733	-75.1	123.33	Antarctic
PRJNA991501Sample65	SRR25194217	PRJNA991501	38896	209	SAMN36295733	2018-12-27	Illumina MiSeq	uncalculated	uncalculated	Antarctica: Concordia station	SAMN36295733	Ice/snow	SAMN36295733	-75.1	123.33	Antarctic
PRJNA991501Sample21	SRR25194218	PRJNA991501	100891	296	SAMN36295733	2018-12-27	Illumina MiSeq	uncalculated	uncalculated	Antarctica: Concordia station	SAMN36295733	Ice/snow	SAMN36295733	-75.1	123.33	Antarctic
PRJNA991501Sample24	SRR25194219	PRJNA991501	64998	289	SAMN36295733	2018-12-27	Illumina MiSeq	uncalculated	uncalculated	Antarctica: Concordia station	SAMN36295733	Ice/snow	SAMN36295733	-75.1	123.33	Antarctic
PRJNA991501Sample5	SRR25194221	PRJNA991501	41932	114	SAMN36295733	2018-12-27	Illumina MiSeq	uncalculated	uncalculated	Antarctica: Concordia station	SAMN36295733	Ice/snow	SAMN36295733	-75.1	123.33	Antarctic
PRJNA991501Sample22	SRR25194222	PRJNA991501	42361	135	SAMN36295733	2018-12-27	Illumina MiSeq	uncalculated	uncalculated	Antarctica: Concordia station	SAMN36295733	Ice/snow	SAMN36295733	-75.1	123.33	Antarctic
PRJNA991501Sample27	SRR25194223	PRJNA991501	50115	177	SAMN36295733	2018-12-27	Illumina MiSeq	uncalculated	uncalculated	Antarctica: Concordia station	SAMN36295733	Ice/snow	SAMN36295733	-75.1	123.33	Antarctic
PRJNA991501Sample59	SRR25194224	PRJNA991501	49796	219	SAMN36295733	2018-12-27	Illumina MiSeq	uncalculated	uncalculated	Antarctica: Concordia station	SAMN36295733	Ice/snow	SAMN36295733	-75.1	123.33	Antarctic
PRJNA991501Sample38	SRR25194225	PRJNA991501	65604	321	SAMN36295733	2018-12-27	Illumina MiSeq	uncalculated	uncalculated	Antarctica: Concordia station	SAMN36295733	Ice/snow	SAMN36295733	-75.1	123.33	Antarctic
PRJNA991501Sample16	SRR25194226	PRJNA991501	101407	359	SAMN36295733	2018-12-27	Illumina MiSeq	uncalculated	uncalculated	Antarctica: Concordia station	SAMN36295733	Ice/snow	SAMN36295733	-75.1	123.33	Antarctic
PRJNA991501Sample55	SRR25194227	PRJNA991501	90454	477	SAMN36295733	2018-12-27	Illumina MiSeq	uncalculated	uncalculated	Antarctica: Concordia station	SAMN36295733	Ice/snow	SAMN36295733	-75.1	123.33	Antarctic
PRJNA991501Sample57	SRR25194228	PRJNA991501	40051	67	SAMN36295733	2018-12-27	Illumina MiSeq	uncalculated	uncalculated	Antarctica: Concordia station	SAMN36295733	Ice/snow	SAMN36295733	-75.1	123.33	Antarctic
PRJNA991501Sample9	SRR25194229	PRJNA991501	62473	208	SAMN36295733	2018-12-27	Illumina MiSeq	uncalculated	uncalculated	Antarctica: Concordia station	SAMN36295733	Ice/snow	SAMN36295733	-75.1	123.33	Antarctic
PRJNA991501Sample37	SRR25194230	PRJNA991501	69814	153	SAMN36295733	2018-12-27	Illumina MiSeq	uncalculated	uncalculated	Antarctica: Concordia station	SAMN36295733	Ice/snow	SAMN36295733	-75.1	123.33	Antarctic
PRJNA991501Sample35	SRR25194232	PRJNA991501	107912	165	SAMN36295733	2018-12-27	Illumina MiSeq	uncalculated	uncalculated	Antarctica: Concordia station	SAMN36295733	Ice/snow	SAMN36295733	-75.1	123.33	Antarctic
PRJNA991501Sample19	SRR25194233	PRJNA991501	38865	66	SAMN36295733	2018-12-27	Illumina MiSeq	uncalculated	uncalculated	Antarctica: Concordia station	SAMN36295733	Ice/snow	SAMN36295733	-75.1	123.33	Antarctic
PRJNA991501Sample70	SRR25194234	PRJNA991501	53480	117	SAMN36295733	2018-12-27	Illumina MiSeq	uncalculated	uncalculated	Antarctica: Concordia station	SAMN36295733	Ice/snow	SAMN36295733	-75.1	123.33	Antarctic
PRJNA991501Sample74	SRR25194235	PRJNA991501	105820	296	SAMN36295733	2018-12-27	Illumina MiSeq	uncalculated	uncalculated	Antarctica: Concordia station	SAMN36295733	Ice/snow	SAMN36295733	-75.1	123.33	Antarctic
PRJNA991501Sample60	SRR25194236	PRJNA991501	116907	586	SAMN36295733	2018-12-27	Illumina MiSeq	uncalculated	uncalculated	Antarctica: Concordia station	SAMN36295733	Ice/snow	SAMN36295733	-75.1	123.33	Antarctic
PRJNA991501Sample44	SRR25194237	PRJNA991501	119799	395	SAMN36295733	2018-12-27	Illumina MiSeq	uncalculated	uncalculated	Antarctica: Concordia station	SAMN36295733	Ice/snow	SAMN36295733	-75.1	123.33	Antarctic
PRJNA991501Sample1	SRR25194238	PRJNA991501	33403	223	SAMN36295733	2018-12-27	Illumina MiSeq	uncalculated	uncalculated	Antarctica: Concordia station	SAMN36295733	Ice/snow	SAMN36295733	-75.1	123.33	Antarctic
PRJNA991501Sample25	SRR25194239	PRJNA991501	83757	215	SAMN36295733	2018-12-27	Illumina MiSeq	uncalculated	uncalculated	Antarctica: Concordia station	SAMN36295733	Ice/snow	SAMN36295733	-75.1	123.33	Antarctic
PRJNA991501Sample39	SRR25194240	PRJNA991501	33192	170	SAMN36295733	2018-12-27	Illumina MiSeq	uncalculated	uncalculated	Antarctica: Concordia station	SAMN36295733	Ice/snow	SAMN36295733	-75.1	123.33	Antarctic
PRJNA991501Sample11	SRR25194241	PRJNA991501	62144	479	SAMN36295733	2018-12-27	Illumina MiSeq	uncalculated	uncalculated	Antarctica: Concordia station	SAMN36295733	Ice/snow	SAMN36295733	-75.1	123.33	Antarctic
PRJNA991501Sample47	SRR25194243	PRJNA991501	46120	395	SAMN36295733	2018-12-27	Illumina MiSeq	uncalculated	uncalculated	Antarctica: Concordia station	SAMN36295733	Ice/snow	SAMN36295733	-75.1	123.33	Antarctic
PRJNA991501Sample7	SRR25194244	PRJNA991501	50379	413	SAMN36295733	2018-12-27	Illumina MiSeq	uncalculated	uncalculated	Antarctica: Concordia station	SAMN36295733	Ice/snow	SAMN36295733	-75.1	123.33	Antarctic
PRJNA991501Sample75	SRR25194245	PRJNA991501	46205	279	SAMN36295733	2018-12-27	Illumina MiSeq	uncalculated	uncalculated	Antarctica: Concordia station	SAMN36295733	Ice/snow	SAMN36295733	-75.1	123.33	Antarctic
PRJNA991501Sample51	SRR25194246	PRJNA991501	66439	235	SAMN36295733	2018-12-27	Illumina MiSeq	uncalculated	uncalculated	Antarctica: Concordia station	SAMN36295733	Ice/snow	SAMN36295733	-75.1	123.33	Antarctic
PRJNA991501Sample28	SRR25194247	PRJNA991501	108950	674	SAMN36295733	2018-12-27	Illumina MiSeq	uncalculated	uncalculated	Antarctica: Concordia station	SAMN36295733	Ice/snow	SAMN36295733	-75.1	123.33	Antarctic
PRJNA991501Sample32	SRR25194248	PRJNA991501	54729	87	SAMN36295733	2018-12-27	Illumina MiSeq	uncalculated	uncalculated	Antarctica: Concordia station	SAMN36295733	Ice/snow	SAMN36295733	-75.1	123.33	Antarctic
PRJNA991501Sample72	SRR25194249	PRJNA991501	72064	204	SAMN36295733	2018-12-27	Illumina MiSeq	uncalculated	uncalculated	Antarctica: Concordia station	SAMN36295733	Ice/snow	SAMN36295733	-75.1	123.33	Antarctic
PRJNA991501Sample71	SRR25194250	PRJNA991501	65297	1210	SAMN36295733	2018-12-27	Illumina MiSeq	uncalculated	uncalculated	Antarctica: Concordia station	SAMN36295733	Ice/snow	SAMN36295733	-75.1	123.33	Antarctic
PRJNA991501Sample61	SRR25194251	PRJNA991501	77919	369	SAMN36295733	2018-12-27	Illumina MiSeq	uncalculated	uncalculated	Antarctica: Concordia station	SAMN36295733	Ice/snow	SAMN36295733	-75.1	123.33	Antarctic
PRJNA991501Sample14	SRR25194252	PRJNA991501	77755	255	SAMN36295733	2018-12-27	Illumina MiSeq	uncalculated	uncalculated	Antarctica: Concordia station	SAMN36295733	Ice/snow	SAMN36295733	-75.1	123.33	Antarctic
PRJNA991501Sample20	SRR25194254	PRJNA991501	81204	651	SAMN36295733	2018-12-27	Illumina MiSeq	uncalculated	uncalculated	Antarctica: Concordia station	SAMN36295733	Ice/snow	SAMN36295733	-75.1	123.33	Antarctic
PRJNA756880Sample10	SRR15563655	PRJNA756880	5584	239	SAMN20928830	2015-07-02	Illumina MiSeq	Austria	Europe	Austria: Sonnblick	SAMN20928830	snow	SAMN20928830	46.9	-13.38	Other alpine regions
PRJNA756880Sample17	SRR15563656	PRJNA756880	6291	786	SAMN20928829	2016-06-01	Illumina MiSeq	Austria	Europe	Austria: Sonnblick	SAMN20928829	snow	SAMN20928829	46.9	-13.38	Other alpine regions
f284	SRR10084736	PRJNA564341	8008	255	SAMN12710444	2015-05-01	Illumina MiSeq	Canada	North America	Canada: Devon Ice Cap	SAMN12710444	snow	SAMN12710444	75.3462	-82.6554	Arctic
PRJNA948675Sample24	SRR23968699	PRJNA948675	36456	274	SAMN33913451	2019-02-01	Illumina MiSeq	Canada	North America	Canada: Northern Quebec\, Uapishka	SAMN33913451	snow	SAMN33913451	51.565	-68.229	Arctic
PRJNA948675Sample19	SRR23968700	PRJNA948675	54462	482	SAMN33913450	2019-02-01	Illumina MiSeq	Canada	North America	Canada: Northern Quebec\, Uapishka	SAMN33913450	snow	SAMN33913450	51.565	-68.229	Arctic
PRJNA948675Sample2	SRR23968706	PRJNA948675	45310	655	SAMN33913445	2018-12-01	Illumina MiSeq	Canada	North America	Canada: Northern Quebec\, Uapishka	SAMN33913445	snow	SAMN33913445	51.565	-68.229	Arctic
PRJNA948675Sample15	SRR23968707	PRJNA948675	69282	280	SAMN33913444	2018-12-01	Illumina MiSeq	Canada	North America	Canada: Northern Quebec\, Uapishka	SAMN33913444	snow	SAMN33913444	51.565	-68.229	Arctic
PRJNA948675Sample9	SRR23968712	PRJNA948675	28346	212	SAMN33913439	2018-12-01	Illumina MiSeq	Canada	North America	Canada: Northern Quebec\, Uapishka	SAMN33913439	snow	SAMN33913439	51.625	-68.116	Arctic
PRJNA948675Sample7	SRR23968704	PRJNA948675	35514	785	SAMN33913446	2019-02-01	Illumina MiSeq	Canada	North America	Canada: Northern Quebec\, Uapishka	SAMN33913446	snow	SAMN33913446	51.646	-68.113	Arctic
PRJNA948675Sample31	SRR23968711	PRJNA948675	49418	272	SAMN33913440	2018-12-01	Illumina MiSeq	Canada	North America	Canada: Northern Quebec\, Uapishka	SAMN33913440	snow	SAMN33913440	51.646	-68.113	Arctic
PRJNA948675Sample6	SRR23968703	PRJNA948675	41993	698	SAMN33913447	2019-02-01	Illumina MiSeq	Canada	North America	Canada: Northern Quebec\, Uapishka	SAMN33913447	snow	SAMN33913447	51.653	-68.108	Arctic
PRJNA948675Sample23	SRR23968710	PRJNA948675	42001	382	SAMN33913441	2018-12-01	Illumina MiSeq	Canada	North America	Canada: Northern Quebec\, Uapishka	SAMN33913441	snow	SAMN33913441	51.653	-68.108	Arctic
PRJNA948675Sample3	SRR23968702	PRJNA948675	30929	522	SAMN33913448	2019-02-01	Illumina MiSeq	Canada	North America	Canada: Northern Quebec\, Uapishka	SAMN33913448	snow	SAMN33913448	51.668	-68.109	Arctic
PRJNA948675Sample5	SRR23968709	PRJNA948675	105480	98	SAMN33913442	2018-12-01	Illumina MiSeq	Canada	North America	Canada: Northern Quebec\, Uapishka	SAMN33913442	snow	SAMN33913442	51.668	-68.109	Arctic
PRJNA948675Sample27	SRR23968701	PRJNA948675	39285	320	SAMN33913449	2019-02-01	Illumina MiSeq	Canada	North America	Canada: Northern Quebec\, Uapishka	SAMN33913449	snow	SAMN33913449	51.68	-68.107	Arctic
PRJNA948675Sample8	SRR23968708	PRJNA948675	33085	128	SAMN33913443	2018-12-01	Illumina MiSeq	Canada	North America	Canada: Northern Quebec\, Uapishka	SAMN33913443	snow	SAMN33913443	51.68	-68.107	Arctic
PRJNA649151Sample1	SRR12363341	PRJNA649151	41081	3836	SAMN15646410	missing	Illumina MiSeq	China	Asia	China: Tibetan Plateau	SAMN15646410	snow	SAMN15646410	38.108	-96.486	Tibetan Plateau
PRJNA649151Sample9	SRR12363342	PRJNA649151	52275	1879	SAMN15646409	missing	Illumina MiSeq	China	Asia	China: Tibetan Plateau	SAMN15646409	snow	SAMN15646409	38.108	-96.485	Tibetan Plateau
PRJNA649151Sample16	SRR12363343	PRJNA649151	72083	3676	SAMN15646408	missing	Illumina MiSeq	China	Asia	China: Tibetan Plateau	SAMN15646408	snow	SAMN15646408	38.108	-96.484	Tibetan Plateau
PRJNA649151Sample23	SRR12363344	PRJNA649151	32459	2901	SAMN15646407	missing	Illumina MiSeq	China	Asia	China: Tibetan Plateau	SAMN15646407	snow	SAMN15646407	38.108	-96.483	Tibetan Plateau
PRJNA649151Sample30	SRR12363345	PRJNA649151	32901	1901	SAMN15646406	missing	Illumina MiSeq	China	Asia	China: Tibetan Plateau	SAMN15646406	snow	SAMN15646406	38.108	-96.482	Tibetan Plateau
PRJNA649151Sample2	SRR12363346	PRJNA649151	40065	2609	SAMN15646405	missing	Illumina MiSeq	China	Asia	China: Tibetan Plateau	SAMN15646405	snow	SAMN15646405	38.108	-96.481	Tibetan Plateau
PRJNA649151Sample10	SRR12363347	PRJNA649151	36329	2155	SAMN15646436	missing	Illumina MiSeq	China	Asia	China: Tibetan Plateau	SAMN15646436	snow	SAMN15646436	38.108	-96.512	Tibetan Plateau
PRJNA649151Sample17	SRR12363348	PRJNA649151	34293	1847	SAMN15646435	missing	Illumina MiSeq	China	Asia	China: Tibetan Plateau	SAMN15646435	snow	SAMN15646435	38.108	-96.511	Tibetan Plateau
PRJNA649151Sample24	SRR12363349	PRJNA649151	38401	1485	SAMN15646434	missing	Illumina MiSeq	China	Asia	China: Tibetan Plateau	SAMN15646434	snow	SAMN15646434	38.108	-96.51	Tibetan Plateau
PRJNA649151Sample31	SRR12363350	PRJNA649151	34413	4042	SAMN15646433	missing	Illumina MiSeq	China	Asia	China: Tibetan Plateau	SAMN15646433	snow	SAMN15646433	38.108	-96.509	Tibetan Plateau
PRJNA649151Sample3	SRR12363351	PRJNA649151	29373	3407	SAMN15646432	missing	Illumina MiSeq	China	Asia	China: Tibetan Plateau	SAMN15646432	snow	SAMN15646432	38.108	-96.508	Tibetan Plateau
PRJNA649151Sample11	SRR12363352	PRJNA649151	37275	3727	SAMN15646431	missing	Illumina MiSeq	China	Asia	China: Tibetan Plateau	SAMN15646431	snow	SAMN15646431	38.108	-96.507	Tibetan Plateau
PRJNA649151Sample18	SRR12363353	PRJNA649151	37279	2640	SAMN15646404	missing	Illumina MiSeq	China	Asia	China: Tibetan Plateau	SAMN15646404	snow	SAMN15646404	38.108	-96.48	Tibetan Plateau
PRJNA649151Sample25	SRR12363354	PRJNA649151	29262	2435	SAMN15646430	missing	Illumina MiSeq	China	Asia	China: Tibetan Plateau	SAMN15646430	snow	SAMN15646430	38.108	-96.506	Tibetan Plateau
PRJNA649151Sample32	SRR12363355	PRJNA649151	26020	2435	SAMN15646429	missing	Illumina MiSeq	China	Asia	China: Tibetan Plateau	SAMN15646429	snow	SAMN15646429	38.108	-96.505	Tibetan Plateau
PRJNA649151Sample4	SRR12363356	PRJNA649151	29202	2542	SAMN15646428	missing	Illumina MiSeq	China	Asia	China: Tibetan Plateau	SAMN15646428	snow	SAMN15646428	38.108	-96.504	Tibetan Plateau
PRJNA649151Sample12	SRR12363357	PRJNA649151	39376	2353	SAMN15646427	missing	Illumina MiSeq	China	Asia	China: Tibetan Plateau	SAMN15646427	snow	SAMN15646427	38.108	-96.503	Tibetan Plateau
PRJNA649151Sample19	SRR12363358	PRJNA649151	27816	2028	SAMN15646426	missing	Illumina MiSeq	China	Asia	China: Tibetan Plateau	SAMN15646426	snow	SAMN15646426	38.108	-96.502	Tibetan Plateau
PRJNA649151Sample26	SRR12363359	PRJNA649151	39320	1646	SAMN15646425	missing	Illumina MiSeq	China	Asia	China: Tibetan Plateau	SAMN15646425	snow	SAMN15646425	38.108	-96.501	Tibetan Plateau
PRJNA649151Sample33	SRR12363360	PRJNA649151	31091	2331	SAMN15646424	missing	Illumina MiSeq	China	Asia	China: Tibetan Plateau	SAMN15646424	snow	SAMN15646424	38.108	-96.5	Tibetan Plateau
PRJNA649151Sample5	SRR12363361	PRJNA649151	39641	1364	SAMN15646423	missing	Illumina MiSeq	China	Asia	China: Tibetan Plateau	SAMN15646423	snow	SAMN15646423	38.108	-96.499	Tibetan Plateau
PRJNA649151Sample13	SRR12363362	PRJNA649151	36291	2119	SAMN15646422	missing	Illumina MiSeq	China	Asia	China: Tibetan Plateau	SAMN15646422	snow	SAMN15646422	38.108	-96.498	Tibetan Plateau
PRJNA649151Sample20	SRR12363363	PRJNA649151	29706	3337	SAMN15646421	missing	Illumina MiSeq	China	Asia	China: Tibetan Plateau	SAMN15646421	snow	SAMN15646421	38.108	-96.497	Tibetan Plateau
PRJNA649151Sample27	SRR12363364	PRJNA649151	38886	2501	SAMN15646403	missing	Illumina MiSeq	China	Asia	China: Tibetan Plateau	SAMN15646403	snow	SAMN15646403	38.108	-96.479	Tibetan Plateau
PRJNA649151Sample34	SRR12363365	PRJNA649151	36509	3199	SAMN15646420	missing	Illumina MiSeq	China	Asia	China: Tibetan Plateau	SAMN15646420	snow	SAMN15646420	38.108	-96.496	Tibetan Plateau
PRJNA649151Sample6	SRR12363366	PRJNA649151	29985	3134	SAMN15646419	missing	Illumina MiSeq	China	Asia	China: Tibetan Plateau	SAMN15646419	snow	SAMN15646419	38.108	-96.495	Tibetan Plateau
PRJNA649151Sample14	SRR12363367	PRJNA649151	38626	2907	SAMN15646418	missing	Illumina MiSeq	China	Asia	China: Tibetan Plateau	SAMN15646418	snow	SAMN15646418	38.108	-96.494	Tibetan Plateau
PRJNA649151Sample21	SRR12363368	PRJNA649151	36644	2977	SAMN15646417	missing	Illumina MiSeq	China	Asia	China: Tibetan Plateau	SAMN15646417	snow	SAMN15646417	38.108	-96.493	Tibetan Plateau
PRJNA649151Sample28	SRR12363369	PRJNA649151	35425	3346	SAMN15646416	missing	Illumina MiSeq	China	Asia	China: Tibetan Plateau	SAMN15646416	snow	SAMN15646416	38.108	-96.492	Tibetan Plateau
PRJNA649151Sample35	SRR12363370	PRJNA649151	33128	2917	SAMN15646415	missing	Illumina MiSeq	China	Asia	China: Tibetan Plateau	SAMN15646415	snow	SAMN15646415	38.108	-96.491	Tibetan Plateau
PRJNA649151Sample7	SRR12363371	PRJNA649151	38559	3570	SAMN15646414	missing	Illumina MiSeq	China	Asia	China: Tibetan Plateau	SAMN15646414	snow	SAMN15646414	38.108	-96.49	Tibetan Plateau
PRJNA649151Sample15	SRR12363372	PRJNA649151	38422	3483	SAMN15646413	missing	Illumina MiSeq	China	Asia	China: Tibetan Plateau	SAMN15646413	snow	SAMN15646413	38.108	-96.489	Tibetan Plateau
PRJNA649151Sample22	SRR12363373	PRJNA649151	30178	2731	SAMN15646412	missing	Illumina MiSeq	China	Asia	China: Tibetan Plateau	SAMN15646412	snow	SAMN15646412	38.108	-96.488	Tibetan Plateau
PRJNA649151Sample29	SRR12363374	PRJNA649151	40512	3154	SAMN15646411	missing	Illumina MiSeq	China	Asia	China: Tibetan Plateau	SAMN15646411	snow	SAMN15646411	38.108	-96.487	Tibetan Plateau
PRJNA649151Sample36	SRR12363375	PRJNA649151	36230	2946	SAMN15646402	missing	Illumina MiSeq	China	Asia	China: Tibetan Plateau	SAMN15646402	snow	SAMN15646402	38.108	-96.478	Tibetan Plateau
PRJNA649151Sample8	SRR12363376	PRJNA649151	37898	2838	SAMN15646401	missing	Illumina MiSeq	China	Asia	China: Tibetan Plateau	SAMN15646401	snow	SAMN15646401	38.108	-96.477	Tibetan Plateau
PRJNA518106Sample10	SRR8513618	PRJNA518106	23882	1343	SAMN10853300	2013-06-13	Illumina MiSeq	Finland	Europe	Finland	SAMN10853300	snow	SAMN10853300	69.0503	20.8386	Arctic
PRJNA518106Sample13	SRR8513628	PRJNA518106	37141	1406	SAMN10853303	2013-06-13	Illumina MiSeq	Finland	Europe	Finland	SAMN10853303	snow	SAMN10853303	69.0706	20.6925	Arctic
PRJNA518106Sample16	SRR8513629	PRJNA518106	37879	2327	SAMN10853302	2013-06-13	Illumina MiSeq	Finland	Europe	Finland	SAMN10853302	snow	SAMN10853302	69.0731	20.6211	Arctic
PRJEB4904Sample7	ERR361919	PRJEB4904	106924	2489	SAMEA2242667	2012-05-18	Illumina MiSeq	Greenland	Greenland	Greenland	SAMEA2242667	snow	SAMEA2242667	67.01	-48.62	Arctic
PRJEB4904Sample12	ERR361920	PRJEB4904	43958	5479	SAMEA2242668	2012-05-18	Illumina MiSeq	Greenland	Greenland	Greenland	SAMEA2242668	snow	SAMEA2242668	67.12	-49.37	Arctic
PRJEB4904Sample22	ERR361921	PRJEB4904	20636	1697	SAMEA2242669	2012-05-18	Illumina MiSeq	Greenland	Greenland	Greenland	SAMEA2242669	snow	SAMEA2242669	67.23	-49.89	Arctic
PRJEB4904Sample1	ERR361914	PRJEB4904	88162	4273	SAMEA2242653	2011-06-09	Illumina MiSeq	Greenland	Greenland	Greenland	PRJEB4904	snow	SAMEA2242653	76.44	-67.85	Arctic
PRJEB4904Sample16	ERR361917	PRJEB4904	154182	5152	SAMEA2242665	2011-08-31	Illumina MiSeq	Greenland	Greenland	Greenland	PRJEB4904	snow	SAMEA2242665	76.46	-67.93	Arctic
PRJEB4904Sample6	ERR361915	PRJEB4904	8038	1856	SAMEA2242654	2011-06-09	Illumina MiSeq	Greenland	Greenland	Greenland	PRJEB4904	snow	SAMEA2242654	76.48	-68.1	Arctic
PRJEB4904Sample11	ERR361916	PRJEB4904	137860	5084	SAMEA2242655	2011-06-09	Illumina MiSeq	Greenland	Greenland	Greenland	PRJEB4904	snow	SAMEA2242655	76.51	-68.18	Arctic
PRJEB4904Sample29	ERR361918	PRJEB4904	12396	2496	SAMEA2242666	2011-06-13	Illumina MiSeq	Greenland	Greenland	Greenland	PRJEB4904	snow	SAMEA2242666	76.53	-68.19	Arctic
PRJNA318626Sample101	SRR3396635	PRJNA318626	5143	82	SAMN04851339	2014-07-03	Illumina MiSeq	Greenland	North America	Greenland: S6	SAMN04851339	snow	SAMN04851339	67.0456	-49.238	Arctic
PRJNA318626Sample3	SRR3396636	PRJNA318626	43165	147	SAMN04851340	2014-07-03	Illumina MiSeq	Greenland	North America	Greenland: S6	SAMN04851340	snow	SAMN04851340	67.0456	-49.238	Arctic
PRJNA318626Sample12	SRR3396637	PRJNA318626	15445	144	SAMN04851341	2014-07-10	Illumina MiSeq	Greenland	North America	Greenland: S6	SAMN04851341	snow	SAMN04851341	67.0456	-49.238	Arctic
PRJNA318626Sample21	SRR3396638	PRJNA318626	30464	236	SAMN04851342	2014-07-10	Illumina MiSeq	Greenland	North America	Greenland: S6	SAMN04851342	snow	SAMN04851342	67.0456	-49.238	Arctic
PRJNA318626Sample30	SRR3396639	PRJNA318626	43770	111	SAMN04851343	2014-07-10	Illumina MiSeq	Greenland	North America	Greenland: S6	SAMN04851343	snow	SAMN04851343	67.0456	-49.238	Arctic
PRJNA318626Sample39	SRR3396640	PRJNA318626	11604	463	SAMN04851344	2014-07-24	Illumina MiSeq	Greenland	North America	Greenland: S6	SAMN04851344	snow	SAMN04851344	67.0456	-49.238	Arctic
PRJNA318626Sample48	SRR3396641	PRJNA318626	36636	310	SAMN04851345	2014-07-24	Illumina MiSeq	Greenland	North America	Greenland: S6	SAMN04851345	snow	SAMN04851345	67.0456	-49.238	Arctic
PRJNA318626Sample57	SRR3396642	PRJNA318626	13191	342	SAMN04851346	2014-07-24	Illumina MiSeq	Greenland	North America	Greenland: S6	SAMN04851346	snow	SAMN04851346	67.0456	-49.238	Arctic
PRJNA318626Sample66	SRR3396643	PRJNA318626	7822	344	SAMN04851347	2014-07-31	Illumina MiSeq	Greenland	North America	Greenland: S6	SAMN04851347	snow	SAMN04851347	67.0456	-49.238	Arctic
PRJNA318626Sample75	SRR3396644	PRJNA318626	5753	269	SAMN04851348	2014-07-31	Illumina MiSeq	Greenland	North America	Greenland: S6	SAMN04851348	snow	SAMN04851348	67.0456	-49.238	Arctic
PRJNA318626Sample84	SRR3396645	PRJNA318626	19003	499	SAMN04851349	2014-07-31	Illumina MiSeq	Greenland	North America	Greenland: S6	SAMN04851349	snow	SAMN04851349	67.0456	-49.238	Arctic
PRJNA318626Sample25	SRR3397091	PRJNA318626	22072	100	SAMN04851390	2014-07-03	Illumina MiSeq	Greenland	North America	Greenland: S6	SAMN04851390	snow	SAMN04851390	67.0456	-49.238	Arctic
PRJNA318626Sample43	SRR3397093	PRJNA318626	11305	44	SAMN04851392	2014-07-03	Illumina MiSeq	Greenland	North America	Greenland: S6	SAMN04851392	snow	SAMN04851392	67.0456	-49.238	Arctic
PRJNA318626Sample79	SRR3397097	PRJNA318626	12171	166	SAMN04851396	2014-07-17	Illumina MiSeq	Greenland	North America	Greenland: S6	SAMN04851396	snow	SAMN04851396	67.0456	-49.238	Arctic
PRJNA318626Sample97	SRR3397099	PRJNA318626	11237	146	SAMN04851398	2014-07-17	Illumina MiSeq	Greenland	North America	Greenland: S6	SAMN04851398	snow	SAMN04851398	67.0456	-49.238	Arctic
PRJNA318626Sample106	SRR3397100	PRJNA318626	15770	188	SAMN04851399	2014-07-24	Illumina MiSeq	Greenland	North America	Greenland: S6	SAMN04851399	snow	SAMN04851399	67.0456	-49.238	Arctic
PRJNA318626Sample8	SRR3397101	PRJNA318626	20171	130	SAMN04851400	2014-07-24	Illumina MiSeq	Greenland	North America	Greenland: S6	SAMN04851400	snow	SAMN04851400	67.0456	-49.238	Arctic
PRJNA318626Sample17	SRR3397102	PRJNA318626	20673	184	SAMN04851401	2014-07-24	Illumina MiSeq	Greenland	North America	Greenland: S6	SAMN04851401	snow	SAMN04851401	67.0456	-49.238	Arctic
PRJNA318626Sample26	SRR3397103	PRJNA318626	5224	159	SAMN04851402	2014-07-31	Illumina MiSeq	Greenland	North America	Greenland: S6	SAMN04851402	snow	SAMN04851402	67.0456	-49.238	Arctic
PRJNA318626Sample35	SRR3397104	PRJNA318626	11638	183	SAMN04851403	2014-07-31	Illumina MiSeq	Greenland	North America	Greenland: S6	SAMN04851403	snow	SAMN04851403	67.0456	-49.238	Arctic
PRJNA318626Sample44	SRR3397105	PRJNA318626	11416	196	SAMN04851404	2014-07-31	Illumina MiSeq	Greenland	North America	Greenland: S6	SAMN04851404	snow	SAMN04851404	67.0456	-49.238	Arctic
PRJNA318626Sample65	SRR3396631	PRJNA318626	8615	103	SAMN04851335	2014-06-19	Illumina MiSeq	Greenland	North America	Greenland: S6	SAMN04851335	snow	SAMN04851335	67.0457	-49.2385	Arctic
PRJNA318626Sample74	SRR3396632	PRJNA318626	13738	237	SAMN04851336	2014-06-26	Illumina MiSeq	Greenland	North America	Greenland: S6	SAMN04851336	snow	SAMN04851336	67.0457	-49.2385	Arctic
PRJNA318626Sample93	SRR3396646	PRJNA318626	64362	203	SAMN04851350	2014-06-19	Illumina MiSeq	Greenland	North America	Greenland: S6	SAMN04851350	snow	SAMN04851350	67.0457	-49.2385	Arctic
PRJNA318626Sample96	SRR3397087	PRJNA318626	22284	96	SAMN04851386	2014-06-19	Illumina MiSeq	Greenland	North America	Greenland: S6	SAMN04851386	snow	SAMN04851386	67.0457	-49.2385	Arctic
PRJNA318626Sample53	SRR3397165	PRJNA318626	25657	88	SAMN04851405	2014-06-19	Illumina MiSeq	Greenland	North America	Greenland: S6	SAMN04851405	snow	SAMN04851405	67.0457	-49.2385	Arctic
PRJNA844291Sample19	SRR19503698	PRJNA844291	10571	139	SAMN28797746	2015-04-27	Illumina MiSeq	Greenland	North America	Greenland: Station Nord	SAMN28797746	snow	SAMN28797746	81.6956	-17.0425	Arctic
PRJNA844291Sample23	SRR19503688	PRJNA844291	46246	470	SAMN28797755	2015-04-28	Illumina MiSeq	Greenland	North America	Greenland: Station Nord	SAMN28797755	snow	SAMN28797755	81.7982	-17.9547	Arctic
PRJNA844291Sample21	SRR19503690	PRJNA844291	62519	707	SAMN28797754	2015-04-28	Illumina MiSeq	Greenland	North America	Greenland: Station Nord	SAMN28797754	snow	SAMN28797754	81.8156	-17.9783	Arctic
PRJNA844291Sample33	SRR19503691	PRJNA844291	39937	1415	SAMN28797753	2015-04-28	Illumina MiSeq	Greenland	North America	Greenland: Station Nord	SAMN28797753	snow	SAMN28797753	81.833	-18	Arctic
PRJNA844291Sample29	SRR19503692	PRJNA844291	51769	913	SAMN28797752	2015-04-28	Illumina MiSeq	Greenland	North America	Greenland: Station Nord	SAMN28797752	snow	SAMN28797752	81.833	-18	Arctic
PRJNA844291Sample42	SRR19503695	PRJNA844291	36130	344	SAMN28797749	2015-04-28	Illumina MiSeq	Greenland	North America	Greenland: Station Nord	SAMN28797749	snow	SAMN28797749	81.8506	-18.0215	Arctic
PRJNA844291Sample41	SRR19503696	PRJNA844291	57596	895	SAMN28797748	2015-04-28	Illumina MiSeq	Greenland	North America	Greenland: Station Nord	SAMN28797748	snow	SAMN28797748	81.8506	-18.0215	Arctic
PRJNA844291Sample5	SRR19503697	PRJNA844291	49673	413	SAMN28797747	2015-04-28	Illumina MiSeq	Greenland	North America	Greenland: Station Nord	SAMN28797747	snow	SAMN28797747	81.8506	-18.0215	Arctic
PRJNA844291Sample13	SRR19503693	PRJNA844291	15347	334	SAMN28797751	2015-04-28	Illumina MiSeq	Greenland	North America	Greenland: Station Nord	SAMN28797751	snow	SAMN28797751	81.9371	-18.1264	Arctic
PRJNA844291Sample11	SRR19503694	PRJNA844291	17106	378	SAMN28797750	2015-04-28	Illumina MiSeq	Greenland	North America	Greenland: Station Nord	SAMN28797750	snow	SAMN28797750	81.9371	-18.1264	Arctic
f681	SRR18307774	PRJNA657180	43328	1665	SAMN26570454	2019-08-03	Illumina MiSeq	Iceland	Europe	Iceland: Langjoekull glacier	SAMN26570454	snow	SAMN26570454	64.682	-20.5078	Arctic
f682	SRR18307775	PRJNA657180	32597	1500	SAMN26570455	2019-08-03	Illumina MiSeq	Iceland	Europe	Iceland: Langjoekull glacier	SAMN26570455	snow	SAMN26570455	64.682	-20.5078	Arctic
f701	SRR18307794	PRJNA657180	6516	585	SAMN26570443	2019-08-03	Illumina MiSeq	Iceland	Europe	Iceland: Langjoekull glacier	SAMN26570443	snow	SAMN26570443	64.682	-20.5078	Arctic
f703	SRR18307796	PRJNA657180	45398	1322	SAMN26570441	2019-08-03	Illumina MiSeq	Iceland	Europe	Iceland: Langjoekull glacier	SAMN26570441	snow	SAMN26570441	64.682	-20.5078	Arctic
f697	SRR18307790	PRJNA657180	71842	1928	SAMN26570447	2019-08-02	Illumina MiSeq	Iceland	Europe	Iceland: Snaefellsjoekull glacier	SAMN26570447	snow	SAMN26570447	64.8141	-23.7514	Arctic
f698	SRR18307791	PRJNA657180	16757	1054	SAMN26570448	2019-08-02	Illumina MiSeq	Iceland	Europe	Iceland: Snaefellsjoekull glacier	SAMN26570448	snow	SAMN26570448	64.8141	-23.7514	Arctic
f711	SRR18307804	PRJNA657180	12964	818	SAMN26570434	2019-08-02	Illumina MiSeq	Iceland	Europe	Iceland: Snaefellsjoekull glacier	SAMN26570434	snow	SAMN26570434	64.8141	-23.7514	Arctic
f712	SRR18307805	PRJNA657180	30135	1180	SAMN26570433	2019-08-02	Illumina MiSeq	Iceland	Europe	Iceland: Snaefellsjoekull glacier	SAMN26570433	snow	SAMN26570433	64.8141	-23.7514	Arctic
f713	SRR18307806	PRJNA657180	49141	2200	SAMN26570432	2019-08-02	Illumina MiSeq	Iceland	Europe	Iceland: Snaefellsjoekull glacier	SAMN26570432	snow	SAMN26570432	64.8141	-23.7514	Arctic
PRJEB27775Sample1	ERR2699136	PRJEB27775	49860	281	SAMEA4790319	2014-05-31	Illumina MiSeq	Italy	Europe		SAMEA4790319	snow	SAMEA4790319	46.3974	10.5944	Other alpine regions
PRJEB27775Sample2	ERR2699137	PRJEB27775	60007	261	SAMEA4790320	2014-05-31	Illumina MiSeq	Italy	Europe		SAMEA4790320	snow	SAMEA4790320	46.3974	10.5944	Other alpine regions
PRJEB27775Sample3	ERR2699138	PRJEB27775	58528	227	SAMEA4790321	2014-05-31	Illumina MiSeq	Italy	Europe		SAMEA4790321	snow	SAMEA4790321	46.3974	10.5944	Other alpine regions
PRJEB27775Sample9	ERR2699139	PRJEB27775	108459	334	SAMEA4790322	2014-05-31	Illumina MiSeq	Italy	Europe		SAMEA4790322	snow	SAMEA4790322	46.3974	10.5944	Other alpine regions
PRJEB27775Sample11	ERR2699140	PRJEB27775	141943	320	SAMEA4790323	2014-05-31	Illumina MiSeq	Italy	Europe		SAMEA4790323	snow	SAMEA4790323	46.3974	10.5944	Other alpine regions
PRJEB27775Sample14	ERR2699141	PRJEB27775	191840	299	SAMEA4790324	2014-05-31	Illumina MiSeq	Italy	Europe		SAMEA4790324	snow	SAMEA4790324	46.3974	10.5944	Other alpine regions
PRJEB27775Sample5	ERR2699143	PRJEB27775	86496	792	SAMEA4790326	2014-10-21	Illumina MiSeq	Nepal	Asia		SAMEA4790326	snow	SAMEA4790326	27.9573	86.8133	Tibetan Plateau
PRJEB27775Sample10	ERR2699142	PRJEB27775	60217	681	SAMEA4790325	2014-10-21	Illumina MiSeq	Nepal	Asia		SAMEA4790325	snow	SAMEA4790325	27.9578	86.8121	Tibetan Plateau
PRJEB27775Sample21	ERR2699145	PRJEB27775	382490	915	SAMEA4790328	2014-10-26	Illumina MiSeq	Nepal	Asia		SAMEA4790328	snow	SAMEA4790328	27.9792	86.788	Tibetan Plateau
PRJEB27775Sample18	ERR2699146	PRJEB27775	24148	618	SAMEA4790329	2014-10-26	Illumina MiSeq	Nepal	Asia		SAMEA4790329	snow	SAMEA4790329	27.9796	86.7868	Tibetan Plateau
PRJEB27775Sample20	ERR2699144	PRJEB27775	153631	744	SAMEA4790327	2014-10-26	Illumina MiSeq	Nepal	Asia		SAMEA4790327	snow	SAMEA4790327	27.9802	86.7757	Tibetan Plateau
PRJEB27775Sample22	ERR2699147	PRJEB27775	15777	547	SAMEA4790330	2014-10-26	Illumina MiSeq	Nepal	Asia		SAMEA4790330	snow	SAMEA4790330	27.9805	86.7864	Tibetan Plateau
PRJEB27775Sample23	ERR2699148	PRJEB27775	53451	660	SAMEA4790331	2014-10-26	Illumina MiSeq	Nepal	Asia		SAMEA4790331	snow	SAMEA4790331	27.9822	86.7827	Tibetan Plateau
PRJNA518106Sample12	SRR8513619	PRJNA518106	40281	1303	SAMN10853311	2013-06-15	Illumina MiSeq	Norway	Europe	Norway	SAMN10853311	snow	SAMN10853311	66.2028	14.5658	Arctic
PRJNA518106Sample6	SRR8513620	PRJNA518106	40460	1434	SAMN10853310	2013-06-15	Illumina MiSeq	Norway	Europe	Norway	SAMN10853310	snow	SAMN10853310	66.7664	15.8319	Arctic
PRJNA518106Sample14	SRR8513623	PRJNA518106	40902	1433	SAMN10853307	2013-06-14	Illumina MiSeq	Norway	Europe	Norway	SAMN10853307	snow	SAMN10853307	68.4481	18.1011	Arctic
PRJNA518106Sample23	SRR8513627	PRJNA518106	38831	1876	SAMN10853306	2013-06-14	Illumina MiSeq	Norway	Europe	Norway	SAMN10853306	snow	SAMN10853306	68.4611	18.0283	Arctic
PRJNA518106Sample11	SRR8513625	PRJNA518106	33658	1080	SAMN10853305	2013-06-14	Illumina MiSeq	Norway	Europe	Norway	SAMN10853305	snow	SAMN10853305	68.5125	17.9656	Arctic
PRJNA518106Sample20	SRR8513626	PRJNA518106	74721	1646	SAMN10853304	2013-06-14	Illumina MiSeq	Norway	Europe	Norway	SAMN10853304	snow	SAMN10853304	68.5194	17.8711	Arctic
PRJNA518106Sample4	SRR8513615	PRJNA518106	23219	1202	SAMN10853301	2013-06-13	Illumina MiSeq	Norway	Europe	Norway	SAMN10853301	snow	SAMN10853301	69.0642	20.5517	Arctic
PRJEB27775Sample17	ERR2699131	PRJEB27775	12617	141	SAMEA4790314	2013-07-05	Illumina MiSeq	Pakistan	Asia		SAMEA4790314	snow	SAMEA4790314	35.7291	76.6429	Tibetan Plateau
PRJEB27775Sample7	ERR2699132	PRJEB27775	17276	114	SAMEA4790315	2013-07-05	Illumina MiSeq	Pakistan	Asia		SAMEA4790315	snow	SAMEA4790315	35.7294	76.6423	Tibetan Plateau
PRJEB27775Sample15	ERR2699135	PRJEB27775	80694	179	SAMEA4790318	2013-07-07	Illumina MiSeq	Pakistan	Asia		SAMEA4790318	snow	SAMEA4790318	35.7312	76.6615	Tibetan Plateau
PRJEB27775Sample4	ERR2699134	PRJEB27775	131933	155	SAMEA4790317	2013-07-07	Illumina MiSeq	Pakistan	Asia		SAMEA4790317	snow	SAMEA4790317	35.7336	76.6735	Tibetan Plateau
PRJEB27775Sample19	ERR2699133	PRJEB27775	37228	226	SAMEA4790316	2013-07-06	Illumina MiSeq	Pakistan	Asia		SAMEA4790316	snow	SAMEA4790316	35.7391	76.6303	Tibetan Plateau
PRJNA518106Sample18	SRR8513616	PRJNA518106	55566	1380	SAMN10853309	2013-06-15	Illumina MiSeq	Sweden	Europe	Sweden	SAMN10853309	snow	SAMN10853309	66.7006	15.9425	Other alpine regions
PRJNA518106Sample24	SRR8513617	PRJNA518106	38792	1757	SAMN10853308	2013-06-15	Illumina MiSeq	Sweden	Europe	Sweden	SAMN10853308	snow	SAMN10853308	66.7319	16.0331	Other alpine regions
PRJEB9478Sample16	ERR903132	PRJEB9478	102935	554	SAMEA3430769	2014-06-08	Illumina MiSeq	Switzerland	Europe		SAMEA3430769	snow	SAMEA3430769	-46.5531	-8.00472	Other alpine regions
PRJEB9478Sample13	ERR903133	PRJEB9478	215571	1346	SAMEA3430770	2014-06-08	Illumina MiSeq	Switzerland	Europe		SAMEA3430770	snow	SAMEA3430770	-46.5531	-8.00472	Other alpine regions
PRJEB9478Sample15	ERR903137	PRJEB9478	273247	295	SAMEA3430774	2014-06-08	Illumina MiSeq	Switzerland	Europe		SAMEA3430774	snow	SAMEA3430774	-46.5531	-8.00472	Other alpine regions
PRJEB9478Sample7	ERR903139	PRJEB9478	467022	241	SAMEA3430776	2014-06-08	Illumina MiSeq	Switzerland	Europe		SAMEA3430776	snow	SAMEA3430776	-46.5531	-8.00472	Other alpine regions
PRJEB9478Sample12	ERR903140	PRJEB9478	9261	394	SAMEA3430777	2014-06-08	Illumina MiSeq	Switzerland	Europe		SAMEA3430777	snow	SAMEA3430777	-46.5531	-8.00472	Other alpine regions
PRJEB9478Sample14	ERR903141	PRJEB9478	92329	125	SAMEA3430778	2014-06-08	Illumina MiSeq	Switzerland	Europe		SAMEA3430778	snow	SAMEA3430778	-46.5531	-8.00472	Other alpine regions
PRJEB9478Sample10	ERR903143	PRJEB9478	38557	143	SAMEA3430780	2014-06-08	Illumina MiSeq	Switzerland	Europe		SAMEA3430780	snow	SAMEA3430780	-46.5531	-8.00472	Other alpine regions
PRJEB9478Sample22	ERR903144	PRJEB9478	298905	590	SAMEA3430781	2014-06-08	Illumina MiSeq	Switzerland	Europe		SAMEA3430781	snow	SAMEA3430781	-46.5531	-8.00472	Other alpine regions
PRJEB9478Sample9	ERR903145	PRJEB9478	38741	192	SAMEA3430782	2014-06-08	Illumina MiSeq	Switzerland	Europe		SAMEA3430782	snow	SAMEA3430782	-46.5531	-8.00472	Other alpine regions
PRJEB9478Sample8	ERR903148	PRJEB9478	229513	297	SAMEA3430785	2014-06-08	Illumina MiSeq	Switzerland	Europe		SAMEA3430785	snow	SAMEA3430785	-46.5531	-8.00472	Other alpine regions
PRJEB9478Sample5	ERR903149	PRJEB9478	14631	419	SAMEA3430786	2014-06-08	Illumina MiSeq	Switzerland	Europe		SAMEA3430786	snow	SAMEA3430786	-46.5531	-8.00472	Other alpine regions
PRJEB9478Sample3	ERR903150	PRJEB9478	9696	201	SAMEA3430787	2014-06-08	Illumina MiSeq	Switzerland	Europe		SAMEA3430787	snow	SAMEA3430787	-46.5531	-8.00472	Other alpine regions
PRJEB9478Sample20	ERR903151	PRJEB9478	102891	231	SAMEA3430788	2014-06-08	Illumina MiSeq	Switzerland	Europe		SAMEA3430788	snow	SAMEA3430788	-46.5531	-8.00472	Other alpine regions
PRJEB9478Sample18	ERR903152	PRJEB9478	17123	506	SAMEA3430789	2014-06-08	Illumina MiSeq	Switzerland	Europe		SAMEA3430789	snow	SAMEA3430789	-46.5531	-8.00472	Other alpine regions
PRJEB9478Sample19	ERR903153	PRJEB9478	17169	335	SAMEA3430790	2014-06-08	Illumina MiSeq	Switzerland	Europe		SAMEA3430790	snow	SAMEA3430790	-46.5531	-8.00472	Other alpine regions
PRJEB9478Sample21	ERR903154	PRJEB9478	493744	307	SAMEA3430791	2014-06-08	Illumina MiSeq	Switzerland	Europe		SAMEA3430791	snow	SAMEA3430791	-46.5531	-8.00472	Other alpine regions
PRJEB9658Sample4	ERR922616	PRJEB9658	13707	139	SAMEA3463556	2014-03-10	Illumina MiSeq	Switzerland	Europe		SAMEA3463556	snow	SAMEA3463556	-46.3936	-8.278	Other alpine regions
PRJEB9658Sample6	ERR922621	PRJEB9658	25372	527	SAMEA3463561	2014-04-14	Illumina MiSeq	Switzerland	Europe		SAMEA3463561	snow	SAMEA3463561	-46.3936	-8.278	Other alpine regions
PRJEB9658Sample11	ERR922622	PRJEB9658	16662	460	SAMEA3463562	2014-04-14	Illumina MiSeq	Switzerland	Europe		SAMEA3463562	snow	SAMEA3463562	-46.3936	-8.278	Other alpine regions
PRJEB9658Sample8	ERR922623	PRJEB9658	9997	226	SAMEA3463563	2014-04-14	Illumina MiSeq	Switzerland	Europe		SAMEA3463563	snow	SAMEA3463563	-46.3936	-8.278	Other alpine regions
PRJEB9658Sample12	ERR922625	PRJEB9658	55341	1232	SAMEA3463565	2014-04-14	Illumina MiSeq	Switzerland	Europe		SAMEA3463565	snow	SAMEA3463565	-46.3936	-8.278	Other alpine regions
PRJNA756880Sample12	SRR15563653	PRJNA756880	5681	305	SAMN20928832	2015-06-25	Illumina MiSeq	Switzerland	Europe	Switzerland: Jungfraujoch	SAMN20928832	snow	SAMN20928832	46.55	-7.98	Other alpine regions
PRJNA756880Sample3	SRR15563672	PRJNA756880	8008	285	SAMN20928837	2015-06-25	Illumina MiSeq	Switzerland	Europe	Switzerland: Jungfraujoch	SAMN20928837	snow	SAMN20928837	46.55	-7.98	Other alpine regions
PRJNA756880Sample9	SRR15563673	PRJNA756880	9137	342	SAMN20928836	2015-06-25	Illumina MiSeq	Switzerland	Europe	Switzerland: Jungfraujoch	SAMN20928836	snow	SAMN20928836	46.55	-7.98	Other alpine regions
PRJEB27775Sample16	ERR2699126	PRJEB27775	48571	385	SAMEA4790309	2014-07-23	Illumina MiSeq	Turkey	Asia		SAMEA4790309	snow	SAMEA4790309	39.102	44.2984	Tibetan Plateau
PRJEB27775Sample12	ERR2699128	PRJEB27775	26501	176	SAMEA4790311	2014-07-23	Illumina MiSeq	Turkey	Asia		SAMEA4790311	snow	SAMEA4790311	39.7037	44.2943	Tibetan Plateau
PRJEB27775Sample8	ERR2699129	PRJEB27775	20484	336	SAMEA4790312	2014-07-23	Illumina MiSeq	Turkey	Asia		SAMEA4790312	snow	SAMEA4790312	39.7037	44.2943	Tibetan Plateau
PRJEB27775Sample6	ERR2699130	PRJEB27775	239596	608	SAMEA4790313	2014-07-23	Illumina MiSeq	Turkey	Asia		SAMEA4790313	snow	SAMEA4790313	39.7037	44.2943	Tibetan Plateau
PRJEB27775Sample13	ERR2699127	PRJEB27775	33406	359	SAMEA4790310	2014-07-23	Illumina MiSeq	Turkey	Asia		SAMEA4790310	snow	SAMEA4790310	39.7042	44.2951	Tibetan Plateau
f1244	SRR3667362	PRJNA322651	13115	97	SAMN05179492	2009-12-11	Illumina MiSeq	uncalculated	Antarctica	Canada Glacier Snow	SAMN05179492	snow	SAMN05179492	-77.6156	162.971	Antarctic
f1250	SRR3667392	PRJNA322651	14537	295	SAMN05179517	2009-12-09	Illumina MiSeq	uncalculated	Antarctica	Cotton Glacier Snow	SAMN05179517	snow	SAMN05179517	-77.1167	161.667	Antarctic
PRJNA529498Sample8	SRR8799200	PRJNA529498	35578	223	SAMN11268761	2017-02-02	Illumina MiSeq	uncalculated	uncalculated	Antarctica: Queen Maud Land	SAMN11268761	snow	SAMN11268761	-71.9518	23.3485	Antarctic
PRJNA702009Sample29	SRR13721028	PRJNA702009	69152	1377	SAMN17922008	2021-01-24	Illumina NovaSeq 6000	uncalculated	uncalculated	Antarctica	SAMN17922008	snow	SAMN17922008	-64.8963	-62.8703	Antarctic
PRJNA702009Sample32	SRR13721027	PRJNA702009	67647	1607	SAMN17922009	2021-01-24	Illumina NovaSeq 6000	uncalculated	uncalculated	Antarctica	SAMN17922009	snow	SAMN17922009	-64.8962	-62.8703	Antarctic
PRJNA702009Sample35	SRR13721030	PRJNA702009	46182	1532	SAMN17922006	2021-01-24	Illumina NovaSeq 6000	uncalculated	uncalculated	Antarctica	SAMN17922006	snow	SAMN17922006	-64.8962	-62.8703	Antarctic
PRJNA702009Sample14	SRR13721022	PRJNA702009	60301	1353	SAMN17921997	2020-02-16	Illumina NovaSeq 6000	uncalculated	uncalculated	Antarctica	SAMN17921997	snow	SAMN17921997	-64.8957	-62.8694	Antarctic
PRJNA702009Sample3	SRR13721019	PRJNA702009	59837	1384	SAMN17922000	2020-02-16	Illumina NovaSeq 6000	uncalculated	uncalculated	Antarctica	SAMN17922000	snow	SAMN17922000	-64.8955	-62.8698	Antarctic
PRJNA702009Sample23	SRR13721036	PRJNA702009	56393	1581	SAMN17921992	2020-02-17	Illumina NovaSeq 6000	uncalculated	uncalculated	Antarctica	SAMN17921992	snow	SAMN17921992	-64.8955	-62.8698	Antarctic
PRJNA702009Sample47	SRR13721029	PRJNA702009	65070	1654	SAMN17922007	2021-01-24	Illumina NovaSeq 6000	uncalculated	uncalculated	Antarctica	SAMN17922007	snow	SAMN17922007	-64.827	-63.4915	Antarctic
PRJNA702009Sample27	SRR13721035	PRJNA702009	72484	1138	SAMN17921993	2020-02-15	Illumina NovaSeq 6000	uncalculated	uncalculated	Antarctica	SAMN17921993	snow	SAMN17921993	-64.8177	-63.5055	Antarctic
PRJNA702009Sample42	SRR13721020	PRJNA702009	56327	1310	SAMN17921999	2020-02-16	Illumina NovaSeq 6000	uncalculated	uncalculated	Antarctica	SAMN17921999	snow	SAMN17921999	-64.7157	-62.8684	Antarctic
PRJNA702009Sample1	SRR13721023	PRJNA702009	65410	1368	SAMN17921996	2020-02-16	Illumina NovaSeq 6000	uncalculated	uncalculated	Antarctica	SAMN17921996	snow	SAMN17921996	-64.7157	-62.8684	Antarctic
PRJNA702009Sample57	SRR13721021	PRJNA702009	56688	1157	SAMN17921998	2020-02-12	Illumina NovaSeq 6000	uncalculated	uncalculated	Antarctica	SAMN17921998	snow	SAMN17921998	-64.7155	-62.8686	Antarctic
PRJNA702009Sample26	SRR13721034	PRJNA702009	62904	1118	SAMN17922002	2020-02-16	Illumina NovaSeq 6000	uncalculated	uncalculated	Antarctica	SAMN17922002	snow	SAMN17922002	-64.7155	-62.8686	Antarctic
PRJNA702009Sample9	SRR13721024	PRJNA702009	54148	1168	SAMN17921995	2020-02-14	Illumina NovaSeq 6000	uncalculated	uncalculated	Antarctica	SAMN17921995	snow	SAMN17921995	-64.6827	-62.6245	Antarctic
PRJNA702009Sample56	SRR13721025	PRJNA702009	54798	1239	SAMN17921994	2020-02-14	Illumina NovaSeq 6000	uncalculated	uncalculated	Antarctica	SAMN17921994	snow	SAMN17921994	-64.6827	-62.6245	Antarctic
PRJNA702009Sample54	SRR13721033	PRJNA702009	59875	1052	SAMN17922003	2020-02-14	Illumina NovaSeq 6000	uncalculated	uncalculated	Antarctica	SAMN17922003	snow	SAMN17922003	-64.6827	-62.6245	Antarctic
PRJNA702009Sample5	SRR13721018	PRJNA702009	51207	2255	SAMN17922001	2020-02-17	Illumina NovaSeq 6000	uncalculated	uncalculated	Antarctica	SAMN17922001	snow	SAMN17922001	-62.2169	-58.9689	Antarctic
PRJNA702009Sample15	SRR13721031	PRJNA702009	55715	2257	SAMN17922005	2020-02-17	Illumina NovaSeq 6000	uncalculated	uncalculated	Antarctica	SAMN17922005	snow	SAMN17922005	-62.2169	-58.9689	Antarctic
PRJNA702009Sample25	SRR13721032	PRJNA702009	45630	2112	SAMN17922004	2020-02-17	Illumina NovaSeq 6000	uncalculated	uncalculated	Antarctica	SAMN17922004	snow	SAMN17922004	-62.2169	-58.9689	Antarctic
PRJNA702009Sample39	SRR13721026	PRJNA702009	38153	1014	SAMN17922010	2020-02-17	Illumina NovaSeq 6000	uncalculated	uncalculated	Antarctica	SAMN17922010	snow	SAMN17922010	-62.2167	-58.969	Antarctic
PRJNA808682Sample12	SRR18086724	PRJNA808682	99537	1069	SAMN26101277	2014-01-10	Illumina MiSeq	uncalculated	uncalculated	Antarctica	SAMN26101277	snow	SAMN26101277	-84	-79.3	Antarctic
PRJNA808682Sample26	SRR18086735	PRJNA808682	90678	645	SAMN26101276	2014-01-10	Illumina MiSeq	uncalculated	uncalculated	Antarctica	SAMN26101276	snow	SAMN26101276	-84	-79.3	Antarctic
PRJNA808682Sample62	SRR18086746	PRJNA808682	66721	506	SAMN26101275	2014-01-10	Illumina MiSeq	uncalculated	uncalculated	Antarctica	SAMN26101275	snow	SAMN26101275	-84	-79.3	Antarctic
PRJNA808682Sample29	SRR18086757	PRJNA808682	32743	452	SAMN26101274	2014-01-10	Illumina MiSeq	uncalculated	uncalculated	Antarctica	SAMN26101274	snow	SAMN26101274	-84	-79.3	Antarctic
PRJNA808682Sample68	SRR18086768	PRJNA808682	38534	447	SAMN26101273	2014-01-10	Illumina MiSeq	uncalculated	uncalculated	Antarctica	SAMN26101273	snow	SAMN26101273	-84	-79.3	Antarctic
PRJNA808682Sample74	SRR18086769	PRJNA808682	52687	676	SAMN26101272	2014-01-10	Illumina MiSeq	uncalculated	uncalculated	Antarctica	SAMN26101272	snow	SAMN26101272	-84	-79.3	Antarctic
PRJNA309355Sample1	SRR4090961	PRJNA309355	5380	369	SAMN04432023	2015-02-02	Illumina MiSeq	USA	North America	Terrestrial subalpine snow in Sierra Nevada California	SAMN04432023	snow	SAMN04432023	37.0671	-118.987	Other alpine regions
PRJNA309355Sample2	SRR4090979	PRJNA309355	11517	761	SAMN04432024	2015-02-02	Illumina MiSeq	USA	North America	Terrestrial subalpine snow in Sierra Nevada California	SAMN04432024	snow	SAMN04432024	37.0671	-118.987	Other alpine regions
f966	SRR7622981	PRJNA483479	5588	827	SAMN09741819	2016-08-06	Illumina MiSeq	USA	North America	USA: Collier Glacier	SAMN09741819	snow	SAMN09741819	44.171	-121.789	Other alpine regions
f965	SRR7622980	PRJNA483479	37457	1857	SAMN09741820	2016-08-06	Illumina MiSeq	USA	North America	USA: Collier Glacier	SAMN09741820	snow	SAMN09741820	44.171	-121.789	Other alpine regions
f951	SRR7622966	PRJNA483479	37935	1214	SAMN09741812	2016-07-30	Illumina MiSeq	USA	North America	USA: Eliot Glacier	SAMN09741812	snow	SAMN09741812	45.3852	-121.671	Other alpine regions
f945	SRR7622960	PRJNA483479	10458	843	SAMN09741816	2016-07-30	Illumina MiSeq	USA	North America	USA: Eliot Glacier	SAMN09741816	snow	SAMN09741816	45.3856	-121.671	Other alpine regions
f946	SRR7622961	PRJNA483479	195007	2392	SAMN09741815	2016-07-30	Illumina MiSeq	USA	North America	USA: Eliot Glacier	SAMN09741815	snow	SAMN09741815	45.3856	-121.671	Other alpine regions
f947	SRR7622962	PRJNA483479	49811	1105	SAMN09741808	2016-07-29	Illumina MiSeq	USA	North America	USA: Mount Adams	SAMN09741808	snow	SAMN09741808	46.1597	-121.473	Other alpine regions
f952	SRR7622967	PRJNA483479	39779	1282	SAMN09741811	2016-07-29	Illumina MiSeq	USA	North America	USA: Mount Adams	SAMN09741811	snow	SAMN09741811	46.1601	-121.471	Other alpine regions
f949	SRR7622964	PRJNA483479	23662	458	SAMN09741810	2016-07-29	Illumina MiSeq	USA	North America	USA: Mount Adams	SAMN09741810	snow	SAMN09741810	46.1601	-121.471	Other alpine regions
PRJNA518106Sample15	SRR8513622	PRJNA518106	48493	1500	SAMN10853312	2013-07-08	Illumina MiSeq	USA	North America	USA	SAMN10853312	snow	SAMN10853312	40.0686	-105.624	Other alpine regions
PRJNA518106Sample5	SRR8513624	PRJNA518106	65244	1432	SAMN10853314	2013-07-08	Illumina MiSeq	USA	North America	USA	SAMN10853314	snow	SAMN10853314	40.0694	-105.611	Other alpine regions
PRJNA518106Sample8	SRR8513621	PRJNA518106	39722	1321	SAMN10853313	2013-07-08	Illumina MiSeq	USA	North America	USA	SAMN10853313	snow	SAMN10853313	40.0708	-105.613	Other alpine regions
PRJNA629965Sample36	SRR11669297	PRJNA629965	29881	497	SAMN14814885	2017-07-22	Illumina MiSeq	USA	North America	USA: Oregon	SAMN14814885	snow	SAMN14814885	45.3853	-121.67	Other alpine regions
PRJNA629965Sample26	SRR11669296	PRJNA629965	35906	749	SAMN14814886	2017-07-22	Illumina MiSeq	USA	North America	USA: Oregon	SAMN14814886	snow	SAMN14814886	45.3898	-121.658	Other alpine regions
PRJNA629965Sample11	SRR11669257	PRJNA629965	27970	785	SAMN14814921	2019-09-19	Illumina MiSeq	USA	North America	USA: Oregon	SAMN14814921	snow	SAMN14814921	45.3936	-121.663	Other alpine regions
f591	SRR17702725	PRJNA799302	13412	387	SAMN25153928	2019-09-01	Illumina MiSeq	USA	North America	USA: Washington	SAMN25153928	snow	SAMN25153928	46.8152	-121.721	Other alpine regions
f592	SRR17702726	PRJNA799302	14584	510	SAMN25153927	2019-09-01	Illumina MiSeq	USA	North America	USA: Washington	SAMN25153927	snow	SAMN25153927	46.8152	-121.721	Other alpine regions
f594	SRR17702728	PRJNA799302	19736	508	SAMN25153924	2019-09-01	Illumina MiSeq	USA	North America	USA: Washington	SAMN25153924	snow	SAMN25153924	46.8152	-121.721	Other alpine regions
f597	SRR17702731	PRJNA799302	19136	594	SAMN25153922	2019-09-01	Illumina MiSeq	USA	North America	USA: Washington	SAMN25153922	snow	SAMN25153922	46.8152	-121.721	Other alpine regions
f598	SRR17702732	PRJNA799302	19820	768	SAMN25153921	2019-09-01	Illumina MiSeq	USA	North America	USA: Washington	SAMN25153921	snow	SAMN25153921	46.8152	-121.721	Other alpine regions
f599	SRR17702733	PRJNA799302	17049	530	SAMN25153920	2019-08-01	Illumina MiSeq	USA	North America	USA: Washington	SAMN25153920	snow	SAMN25153920	46.8152	-121.721	Other alpine regions
f600	SRR17702734	PRJNA799302	13826	253	SAMN25153919	2019-08-01	Illumina MiSeq	USA	North America	USA: Washington	SAMN25153919	snow	SAMN25153919	46.8152	-121.721	Other alpine regions
f601	SRR17702735	PRJNA799302	19368	710	SAMN25153918	2019-08-01	Illumina MiSeq	USA	North America	USA: Washington	SAMN25153918	snow	SAMN25153918	46.8152	-121.721	Other alpine regions
f604	SRR17702738	PRJNA799302	28988	288	SAMN25153915	2019-08-01	Illumina MiSeq	USA	North America	USA: Washington	SAMN25153915	snow	SAMN25153915	46.8152	-121.721	Other alpine regions
f606	SRR17702740	PRJNA799302	5221	424	SAMN25153913	2019-08-01	Illumina MiSeq	USA	North America	USA: Washington	SAMN25153913	snow	SAMN25153913	46.8152	-121.721	Other alpine regions
f608	SRR17702742	PRJNA799302	6412	347	SAMN25153912	2019-07-01	Illumina MiSeq	USA	North America	USA: Washington	SAMN25153912	snow	SAMN25153912	46.8152	-121.721	Other alpine regions
f609	SRR17702743	PRJNA799302	16662	544	SAMN25153911	2019-07-01	Illumina MiSeq	USA	North America	USA: Washington	SAMN25153911	snow	SAMN25153911	46.8152	-121.721	Other alpine regions
f610	SRR17702744	PRJNA799302	16727	648	SAMN25153910	2019-07-01	Illumina MiSeq	USA	North America	USA: Washington	SAMN25153910	snow	SAMN25153910	46.8152	-121.721	Other alpine regions
f611	SRR17702745	PRJNA799302	13834	610	SAMN25153909	2019-07-01	Illumina MiSeq	USA	North America	USA: Washington	SAMN25153909	snow	SAMN25153909	46.8152	-121.721	Other alpine regions
f612	SRR17702746	PRJNA799302	12594	498	SAMN25153908	2019-07-01	Illumina MiSeq	USA	North America	USA: Washington	SAMN25153908	snow	SAMN25153908	46.8152	-121.721	Other alpine regions
f613	SRR17702747	PRJNA799302	12613	255	SAMN25153907	2019-06-01	Illumina MiSeq	USA	North America	USA: Washington	SAMN25153907	snow	SAMN25153907	46.8152	-121.721	Other alpine regions
f614	SRR17702748	PRJNA799302	13476	439	SAMN25153906	2019-06-01	Illumina MiSeq	USA	North America	USA: Washington	SAMN25153906	snow	SAMN25153906	46.8152	-121.721	Other alpine regions
f615	SRR17702749	PRJNA799302	17347	390	SAMN25153905	2019-06-01	Illumina MiSeq	USA	North America	USA: Washington	SAMN25153905	snow	SAMN25153905	46.8152	-121.721	Other alpine regions
f616	SRR17702750	PRJNA799302	15166	403	SAMN25153904	2019-06-01	Illumina MiSeq	USA	North America	USA: Washington	SAMN25153904	snow	SAMN25153904	46.8152	-121.721	Other alpine regions
f617	SRR17702751	PRJNA799302	10193	222	SAMN25153903	2019-05-01	Illumina MiSeq	USA	North America	USA: Washington	SAMN25153903	snow	SAMN25153903	46.8152	-121.721	Other alpine regions
f621	SRR17702755	PRJNA799302	24836	196	SAMN25153900	2019-09-01	Illumina MiSeq	USA	North America	USA: Washington	SAMN25153900	snow	SAMN25153900	46.8152	-121.721	Other alpine regions
f622	SRR17702756	PRJNA799302	17009	442	SAMN25153899	2019-09-01	Illumina MiSeq	USA	North America	USA: Washington	SAMN25153899	snow	SAMN25153899	46.8152	-121.721	Other alpine regions
f625	SRR17702759	PRJNA799302	11396	958	SAMN25153896	2019-09-01	Illumina MiSeq	USA	North America	USA: Washington	SAMN25153896	snow	SAMN25153896	46.8152	-121.721	Other alpine regions
f627	SRR17702761	PRJNA799302	19431	1097	SAMN25153894	2019-09-01	Illumina MiSeq	USA	North America	USA: Washington	SAMN25153894	snow	SAMN25153894	46.8152	-121.721	Other alpine regions
f637	SRR17702771	PRJNA799302	27487	1004	SAMN25153885	2019-08-01	Illumina MiSeq	USA	North America	USA: Washington	SAMN25153885	snow	SAMN25153885	46.8152	-121.721	Other alpine regions
f638	SRR17702772	PRJNA799302	22604	616	SAMN25153884	2019-08-01	Illumina MiSeq	USA	North America	USA: Washington	SAMN25153884	snow	SAMN25153884	46.8152	-121.721	Other alpine regions
f661	SRR17702795	PRJNA799302	13797	639	SAMN25153930	2019-09-01	Illumina MiSeq	USA	North America	USA: Washington	SAMN25153930	snow	SAMN25153930	46.8152	-121.721	Other alpine regions
f662	SRR17702796	PRJNA799302	15154	384	SAMN25153929	2019-09-01	Illumina MiSeq	USA	North America	USA: Washington	SAMN25153929	snow	SAMN25153929	46.8152	-121.721	Other alpine regions
f663	SRR17702797	PRJNA799302	9810	341	SAMN25153883	2019-07-01	Illumina MiSeq	USA	North America	USA: Washington	SAMN25153883	snow	SAMN25153883	46.8152	-121.721	Other alpine regions
f665	SRR17702799	PRJNA799302	24949	474	SAMN25153873	2019-05-01	Illumina MiSeq	USA	North America	USA: Washington	SAMN25153873	snow	SAMN25153873	46.8152	-121.721	Other alpine regions
PRJEB4904Sample31	ERR361918	PRJEB4904	12396	2496	SAMEA2242666	2011-06-13	Illumina MiSeq			Greenland	SAMEA2242666	snow	SAMEA2242666	-76.53	68.19	Arctic
PRJEB4904Sample23	ERR361916	PRJEB4904	137860	5084	SAMEA2242655	2011-06-09	Illumina MiSeq			Greenland	SAMEA2242655	snow	SAMEA2242655	-76.51	68.18	Arctic
PRJEB4904Sample18	ERR361915	PRJEB4904	8038	1856	SAMEA2242654	2011-06-09	Illumina MiSeq			Greenland	SAMEA2242654	snow	SAMEA2242654	-76.48	68.1	Arctic
PRJEB4904Sample27	ERR361917	PRJEB4904	154182	5152	SAMEA2242665	2011-08-31	Illumina MiSeq			Greenland	SAMEA2242665	snow	SAMEA2242665	-76.46	67.93	Arctic
PRJEB4904Sample13	ERR361914	PRJEB4904	88162	4273	SAMEA2242653	2011-06-09	Illumina MiSeq			Greenland	SAMEA2242653	snow	SAMEA2242653	-76.44	67.85	Arctic
PRJEB4904Sample9	ERR361921	PRJEB4904	20636	1697	SAMEA2242669	2012-05-18	Illumina MiSeq			Greenland	SAMEA2242669	snow	SAMEA2242669	-67.23	49.89	Arctic
PRJEB4904Sample4	ERR361920	PRJEB4904	43958	5479	SAMEA2242668	2012-05-18	Illumina MiSeq			Greenland	SAMEA2242668	snow	SAMEA2242668	-67.12	49.37	Arctic
PRJEB4904Sample35	ERR361919	PRJEB4904	106924	2489	SAMEA2242667	2012-05-18	Illumina MiSeq			Greenland	SAMEA2242667	snow	SAMEA2242667	-67.01	48.62	Arctic
f678	SRR18307771	PRJNA657180	94593	3079	SAMN26570451	2019-08-02	Illumina MiSeq	Iceland	Europe	Iceland: Snaefellsjoekull glacier	SAMN26570451	snow/ice interface	SAMN26570451	64.8145	-23.7492	Arctic
f679	SRR18307772	PRJNA657180	66998	2672	SAMN26570452	2019-08-02	Illumina MiSeq	Iceland	Europe	Iceland: Snaefellsjoekull glacier	SAMN26570452	snow/ice interface	SAMN26570452	64.8145	-23.7492	Arctic
f680	SRR18307773	PRJNA657180	64608	2496	SAMN26570453	2019-08-02	Illumina MiSeq	Iceland	Europe	Iceland: Snaefellsjoekull glacier	SAMN26570453	snow/ice interface	SAMN26570453	64.8145	-23.7492	Arctic
f687	SRR18307780	PRJNA657180	6324	937	SAMN26570459	2019-08-02	Illumina MiSeq	Iceland	Europe	Iceland: Snaefellsjoekull glacier	SAMN26570459	snow/ice interface	SAMN26570459	64.8145	-23.7492	Arctic
f704	SRR18307797	PRJNA657180	26892	1887	SAMN26570440	2019-08-02	Illumina MiSeq	Iceland	Europe	Iceland: Snaefellsjoekull glacier	SAMN26570440	snow/ice interface	SAMN26570440	64.8145	-23.7492	Arctic
f705	SRR18307798	PRJNA657180	23918	1816	SAMN26570439	2019-08-02	Illumina MiSeq	Iceland	Europe	Iceland: Snaefellsjoekull glacier	SAMN26570439	snow/ice interface	SAMN26570439	64.8145	-23.7492	Arctic
f706	SRR18307799	PRJNA657180	59371	2703	SAMN26570438	2019-08-02	Illumina MiSeq	Iceland	Europe	Iceland: Snaefellsjoekull glacier	SAMN26570438	snow/ice interface	SAMN26570438	64.8145	-23.7492	Arctic
f772	SRR26700056	PRJNA1036571	51884	730	SAMN38142841	2019-07/2019-08	Illumina MiSeq	Svalbard	Europe	Svalbard: Foxfonna	SAMN38142841	snow/slush	SAMN38142841	78.143	16.149	Other alpine regions
f773	SRR26700057	PRJNA1036571	36997	678	SAMN38142840	2019-07/2019-08	Illumina MiSeq	Svalbard	Europe	Svalbard: Foxfonna	SAMN38142840	snow/slush	SAMN38142840	78.143	16.149	Other alpine regions
f774	SRR26700058	PRJNA1036571	19192	367	SAMN38142839	2019-07/2019-08	Illumina MiSeq	Svalbard	Europe	Svalbard: Foxfonna	SAMN38142839	snow/slush	SAMN38142839	78.143	16.149	Other alpine regions
f776	SRR26700060	PRJNA1036571	23976	475	SAMN38142838	2019-07/2019-08	Illumina MiSeq	Svalbard	Europe	Svalbard: Foxfonna	SAMN38142838	snow/slush	SAMN38142838	78.143	16.149	Other alpine regions
f777	SRR26700061	PRJNA1036571	55095	661	SAMN38142837	2019-07/2019-08	Illumina MiSeq	Svalbard	Europe	Svalbard: Foxfonna	SAMN38142837	snow/slush	SAMN38142837	78.143	16.149	Other alpine regions
f783	SRR26700079	PRJNA1036571	14727	611	SAMN38142820	2019-07/2019-08	Illumina MiSeq	Svalbard	Europe	Svalbard: Foxfonna	SAMN38142820	snow/slush	SAMN38142820	78.143	16.149	Other alpine regions
f784	SRR26700080	PRJNA1036571	29090	649	SAMN38142818	2019-07/2019-08	Illumina MiSeq	Svalbard	Europe	Svalbard: Foxfonna	SAMN38142818	snow/slush	SAMN38142818	78.143	16.149	Other alpine regions
f785	SRR26700081	PRJNA1036571	12657	444	SAMN38142817	2019-07/2019-08	Illumina MiSeq	Svalbard	Europe	Svalbard: Foxfonna	SAMN38142817	snow/slush	SAMN38142817	78.143	16.149	Other alpine regions
f788	SRR26700106	PRJNA1036571	39250	695	SAMN38142819	2019-07/2019-08	Illumina MiSeq	Svalbard	Europe	Svalbard: Foxfonna	SAMN38142819	snow/slush	SAMN38142819	78.143	16.149	Other alpine regions
PRJEB29215Sample12	ERR2847118	PRJEB29215	150409	1448	SAMEA4979723	2014-01-01	Illumina MiSeq	uncalculated	uncalculated		SAMEA4979723	Surface snow	SAMEA4979723	60.7066	45.5925	Antarctic
PRJEB29215Sample16	ERR2847119	PRJEB29215	64506	3392	SAMEA4979724	2014-01-01	Illumina MiSeq	uncalculated	uncalculated		SAMEA4979724	Surface snow	SAMEA4979724	60.7066	45.5925	Antarctic
PRJEB29215Sample3	ERR2847120	PRJEB29215	86013	2879	SAMEA4979725	2014-01-01	Illumina MiSeq	uncalculated	uncalculated		SAMEA4979725	Surface snow	SAMEA4979725	60.7066	45.5925	Antarctic
PRJEB29215Sample27	ERR2847121	PRJEB29215	594769	1537	SAMEA4979726	2014-01-01	Illumina MiSeq	uncalculated	uncalculated		SAMEA4979726	Surface snow	SAMEA4979726	60.7066	45.5925	Antarctic
PRJEB29215Sample5	ERR2847122	PRJEB29215	56368	2468	SAMEA4979727	2014-01-01	Illumina MiSeq	uncalculated	uncalculated		SAMEA4979727	Surface snow	SAMEA4979727	60.7066	45.5925	Antarctic
PRJEB29215Sample23	ERR2847123	PRJEB29215	48055	3774	SAMEA4979728	2014-01-01	Illumina MiSeq	uncalculated	uncalculated		SAMEA4979728	Surface snow	SAMEA4979728	60.7066	45.5925	Antarctic
PRJEB29215Sample26	ERR2847124	PRJEB29215	58659	4039	SAMEA4979729	2014-01-01	Illumina MiSeq	uncalculated	uncalculated		SAMEA4979729	Surface snow	SAMEA4979729	60.7066	45.5925	Antarctic
PRJEB29215Sample2	ERR2847125	PRJEB29215	151325	2186	SAMEA4979730	2014-01-01	Illumina MiSeq	uncalculated	uncalculated		SAMEA4979730	Surface snow	SAMEA4979730	60.7066	45.5925	Antarctic
PRJEB29215Sample15	ERR2847126	PRJEB29215	34832	2864	SAMEA4979731	2014-01-01	Illumina MiSeq	uncalculated	uncalculated		SAMEA4979731	Surface snow	SAMEA4979731	60.7066	45.5925	Antarctic
PRJEB29215Sample11	ERR2847127	PRJEB29215	64243	1167	SAMEA4979732	2014-01-01	Illumina MiSeq	uncalculated	uncalculated		SAMEA4979732	Surface snow	SAMEA4979732	60.7066	45.5925	Antarctic
PRJEB29215Sample21	ERR2847128	PRJEB29215	134887	3383	SAMEA4979733	2014-01-01	Illumina MiSeq	uncalculated	uncalculated		SAMEA4979733	Surface snow	SAMEA4979733	60.7066	45.5925	Antarctic
PRJEB29215Sample32	ERR2847129	PRJEB29215	54568	1163	SAMEA4979734	2014-01-01	Illumina MiSeq	uncalculated	uncalculated		SAMEA4979734	Surface snow	SAMEA4979734	60.7066	45.5925	Antarctic
PRJEB29215Sample13	ERR2847130	PRJEB29215	45752	2621	SAMEA4979735	2014-01-01	Illumina MiSeq	uncalculated	uncalculated		SAMEA4979735	Surface snow	SAMEA4979735	60.7066	45.5925	Antarctic
PRJEB29215Sample24	ERR2847131	PRJEB29215	25589	2708	SAMEA4979736	2014-01-01	Illumina MiSeq	uncalculated	uncalculated		SAMEA4979736	Surface snow	SAMEA4979736	60.7066	45.5925	Antarctic
PRJEB29215Sample14	ERR2847132	PRJEB29215	116774	2189	SAMEA4979737	2014-01-01	Illumina MiSeq	uncalculated	uncalculated		SAMEA4979737	Surface snow	SAMEA4979737	60.7066	45.5925	Antarctic
PRJEB29215Sample33	ERR2847133	PRJEB29215	39429	2328	SAMEA4979738	2014-01-01	Illumina MiSeq	uncalculated	uncalculated		SAMEA4979738	Surface snow	SAMEA4979738	60.7066	45.5925	Antarctic
PRJEB29215Sample28	ERR2847134	PRJEB29215	27097	2068	SAMEA4979739	2014-01-01	Illumina MiSeq	uncalculated	uncalculated		SAMEA4979739	Surface snow	SAMEA4979739	60.7066	45.5925	Antarctic
PRJEB29215Sample36	ERR2847104	PRJEB29215	7424	121	SAMEA4979709	2012-12-01	Illumina MiSeq	uncalculated	uncalculated		SAMEA4979709	Surface snow	SAMEA4979709	78.8034	84.8034	Antarctic
PRJEB29215Sample1	ERR2847105	PRJEB29215	7141	66	SAMEA4979710	2012-12-01	Illumina MiSeq	uncalculated	uncalculated		SAMEA4979710	Surface snow	SAMEA4979710	78.8034	84.8034	Antarctic
PRJEB29215Sample8	ERR2847106	PRJEB29215	6416	102	SAMEA4979711	2012-12-01	Illumina MiSeq	uncalculated	uncalculated		SAMEA4979711	Surface snow	SAMEA4979711	78.8034	84.8034	Antarctic
PRJEB29215Sample20	ERR2847098	PRJEB29215	9805	618	SAMEA4979703	2012-12-01	Illumina MiSeq	uncalculated	uncalculated		SAMEA4979703	Surface snow	SAMEA4979703	78.9761	90.5178	Antarctic
PRJEB29215Sample18	ERR2847099	PRJEB29215	9605	352	SAMEA4979704	2012-12-01	Illumina MiSeq	uncalculated	uncalculated		SAMEA4979704	Surface snow	SAMEA4979704	78.9761	90.5178	Antarctic
PRJEB29215Sample37	ERR2847110	PRJEB29215	8969	120	SAMEA4979715	2012-12-01	Illumina MiSeq	uncalculated	uncalculated		SAMEA4979715	Surface snow	SAMEA4979715	78.9761	90.5178	Antarctic
PRJEB29215Sample35	ERR2847111	PRJEB29215	7688	94	SAMEA4979716	2012-12-01	Illumina MiSeq	uncalculated	uncalculated		SAMEA4979716	Surface snow	SAMEA4979716	78.9761	90.5178	Antarctic
f269	SRR10084721	PRJNA564341	26353	515	SAMN12710458	2014-05-01	Illumina MiSeq	Canada	North America	Canada: Devon Ice Cap	SAMN12710458	Sverdrup Glacier\, Devon Ice Cap	SAMN12710458	75.6937	-83.2967	Arctic
f270	SRR10084722	PRJNA564341	36544	645	SAMN12710457	2014-05-01	Illumina MiSeq	Canada	North America	Canada: Devon Ice Cap	SAMN12710457	Sverdrup Glacier\, Devon Ice Cap	SAMN12710457	75.6937	-83.2967	Arctic
f264	SRR10084716	PRJNA564341	35486	739	SAMN12710439	2015-05-01	Illumina MiSeq	Canada	North America	Canada: Devon Ice Cap	SAMN12710439	Sverdrup Glacier\, Devon Ice Cap	SAMN12710439	75.7264	-83.1411	Arctic
f267	SRR10084719	PRJNA564341	78755	2603	SAMN12710460	2015-05-01	Illumina MiSeq	Canada	North America	Canada: Devon Ice Cap	SAMN12710460	Sverdrup Glacier\, Devon Ice Cap	SAMN12710460	75.7264	-83.1411	Arctic
f268	SRR10084720	PRJNA564341	96971	1098	SAMN12710459	2015-05-01	Illumina MiSeq	Canada	North America	Canada: Devon Ice Cap	SAMN12710459	Sverdrup Glacier\, Devon Ice Cap	SAMN12710459	75.7264	-83.1411	Arctic
f276	SRR10084728	PRJNA564341	140049	1337	SAMN12710452	2015-05-01	Illumina MiSeq	Canada	North America	Canada: Devon Ice Cap	SAMN12710452	Sverdrup Glacier\, Devon Ice Cap	SAMN12710452	75.7264	-83.1411	Arctic
f279	SRR10084731	PRJNA564341	42947	556	SAMN12710449	2015-05-01	Illumina MiSeq	Canada	North America	Canada: Devon Ice Cap	SAMN12710449	Sverdrup Glacier\, Devon Ice Cap	SAMN12710449	75.7264	-83.1411	Arctic
f280	SRR10084732	PRJNA564341	18727	1350	SAMN12710448	2015-05-01	Illumina MiSeq	Canada	North America	Canada: Devon Ice Cap	SAMN12710448	Sverdrup Glacier\, Devon Ice Cap	SAMN12710448	75.7264	-83.1411	Arctic
f285	SRR10084737	PRJNA564341	24786	723	SAMN12710435	2015-05-01	Illumina MiSeq	Canada	North America	Canada: Devon Ice Cap	SAMN12710435	Sverdrup Glacier\, Devon Ice Cap	SAMN12710435	75.7264	-83.1411	Arctic
PRJNA872833Sample8	SRR21307665	PRJNA872833	135708	1319	SAMN30471363	2021-06-19	Illumina NovaSeq 6000	China	Asia	China: Glacier No. 1 at Headwaters of Urumqi River\, Tianshan Mountains	SAMN30471363	the glacier sueface snow	SAMN30471363	43.1	-86.82	Tibetan Plateau
PRJNA872833Sample2	SRR21307666	PRJNA872833	162103	1366	SAMN30471362	2021-06-19	Illumina NovaSeq 6000	China	Asia	China: Glacier No. 1 at Headwaters of Urumqi River\, Tianshan Mountains	SAMN30471362	the glacier sueface snow	SAMN30471362	43.1	-86.82	Tibetan Plateau
PRJNA872833Sample3	SRR21307667	PRJNA872833	389930	1199	SAMN30471361	2021-04-04	Illumina NovaSeq 6000	China	Asia	China: Glacier No. 1 at Headwaters of Urumqi River\, Tianshan Mountains	SAMN30471361	the glacier sueface snow	SAMN30471361	43.1	-86.82	Tibetan Plateau
PRJNA872833Sample5	SRR21307769	PRJNA872833	42930	611	SAMN30571134	2021-06-19	Illumina NovaSeq 6000	China	Asia	China: Glacier No. 1 at Headwaters of Urumqi River\, Tianshan Mountains	SAMN30571134	the sueface snow	SAMN30571134	43.1	-86.82	Tibetan Plateau
PRJNA872833Sample9	SRR21307770	PRJNA872833	52678	549	SAMN30571133	2021-06-19	Illumina NovaSeq 6000	China	Asia	China: Glacier No. 1 at Headwaters of Urumqi River\, Tianshan Mountains	SAMN30571133	the sueface snow	SAMN30571133	43.1	-86.82	Tibetan Plateau
PRJNA872833Sample7	SRR21307771	PRJNA872833	91007	834	SAMN30571132	2021-04-04	Illumina NovaSeq 6000	China	Asia	China: Glacier No. 1 at Headwaters of Urumqi River\, Tianshan Mountains	SAMN30571132	the sueface snow	SAMN30571132	43.1	-86.82	Tibetan Plateau
PRJNA636650Sample20	SRR11917338	PRJNA636650	40403	2070	SAMN15082966	2012-12-21	Illumina MiSeq	uncalculated	uncalculated	Antarctica: Signy Island	SAMN15082966	Tuva_mid_snowpack	SAMN15082966	-60.72	-45.6	Antarctic
PRJNA636650Sample38	SRR11917349	PRJNA636650	55089	1325	SAMN15082956	2012-12-21	Illumina MiSeq	uncalculated	uncalculated	Antarctica: Signy Island	SAMN15082956	Tuva_mid_snowpack	SAMN15082956	-60.72	-45.6	Antarctic
PRJNA636650Sample31	SRR11917328	PRJNA636650	77433	1608	SAMN15082975	2012-12-21	Illumina MiSeq	uncalculated	uncalculated	Antarctica: Signy Island	SAMN15082975	Tuva_superimposed_ice	SAMN15082975	-60.72	-45.6	Antarctic
PRJNA636650Sample33	SRR11917339	PRJNA636650	66896	1244	SAMN15082965	2013-03-11	Illumina MiSeq	uncalculated	uncalculated	Antarctica: Signy Island	SAMN15082965	Tuva_superimposed_ice	SAMN15082965	-60.72	-45.6	Antarctic
PRJNA636650Sample1	SRR11917350	PRJNA636650	77682	1734	SAMN15082955	2012-12-21	Illumina MiSeq	uncalculated	uncalculated	Antarctica: Signy Island	SAMN15082955	Tuva_superimposed_ice	SAMN15082955	-60.72	-45.6	Antarctic
PRJNA636650Sample14	SRR11917337	PRJNA636650	56368	2468	SAMN15082967	2012-12-21	Illumina MiSeq	uncalculated	uncalculated	Antarctica: Signy Island	SAMN15082967	Tuva_top_snowpack	SAMN15082967	-60.72	-45.6	Antarctic
PRJNA636650Sample34	SRR11917348	PRJNA636650	594769	1537	SAMN15082957	2012-12-21	Illumina MiSeq	uncalculated	uncalculated	Antarctica: Signy Island	SAMN15082957	Tuva_top_snowpack	SAMN15082957	-60.72	-45.6	Antarctic
f262	SRR10084714	PRJNA564341	5883	247	SAMN12710441	2014-05-01	Illumina MiSeq	Canada	North America	Canada: Devon Ice Cap	SAMN12710441	Western Margin\, Devon Ice Cap	SAMN12710441	75.4837	-84.5798	Arctic
f277	SRR10084729	PRJNA564341	12534	634	SAMN12710451	2014-05-01	Illumina MiSeq	Canada	North America	Canada: Devon Ice Cap	SAMN12710451	Western Margin\, Devon Ice Cap	SAMN12710451	75.4837	-84.5798	Arctic
f260	SRR10084712	PRJNA564341	103938	994	SAMN12710443	2015-06-01	Illumina MiSeq	Canada	North America	Canada: Devon Ice Cap	SAMN12710443	Western Margin\, Devon Ice Cap	SAMN12710443	75.6937	-83.2967	Arctic
f1251	SRR3667393	PRJNA322651	43807	1562	SAMN05179518	2009-12-09	Illumina MiSeq	uncalculated	Antarctica	Cotton Glacier Supraglacial Stream Water1	SAMN05179518	Cotton Glacier Supraglacial Stream Water1	SAMN05179518	-77.1167	161.667	Antarctic
f1261	SRR3667403	PRJNA322651	30849	1531	SAMN05179527	2012-01-10	Illumina MiSeq	uncalculated	Antarctica	Cotton Glacier Supraglacial Stream Water10	SAMN05179527	Cotton Glacier Supraglacial Stream Water10	SAMN05179527	-77.1167	161.667	Antarctic
f1260	SRR3667402	PRJNA322651	35465	1458	SAMN05179526	2010-01-12	Illumina MiSeq	uncalculated	Antarctica	Cotton Glacier Supraglacial Stream Water9	SAMN05179526	Cotton Glacier Supraglacial Stream Water9	SAMN05179526	-77.1167	161.667	Antarctic
PRJNA564214Sample66	SRR10080799	PRJNA564214	22448	376	SAMN12705723	2017-06-25	Illumina MiSeq	Greenland	North America	Greenland	SAMN12705723	Cryoconite hole water	SAMN12705723	67.0751	-49.3531	Arctic
PRJNA825340Sample15	SRR23550459	PRJNA825340	44721	1117	SAMN33321557	2015	Illumina MiSeq	India	Asia	India:Himachal Pradesh	SAMN33321557	Cryoconite hole water	SAMN33321557	32.5836	-77.6619	Tibetan Plateau
PRJNA480849Sample104	SRR17375898	PRJNA480849	5746	148	SAMN24469205	2016-11-01	Illumina MiSeq	uncalculated	uncalculated	Antarctica: Taylor Valley	SAMN24469205	Cryoconite hole water	SAMN24469205	-77.7416	-162.106	Antarctic
PRJNA480849Sample123	SRR17376129	PRJNA480849	5409	130	SAMN24469206	2016-11-01	Illumina MiSeq	uncalculated	uncalculated	Antarctica: Taylor Valley	SAMN24469206	Cryoconite hole water	SAMN24469206	-77.7416	-162.106	Antarctic
PRJNA480849Sample75	SRR17375899	PRJNA480849	5694	226	SAMN24469204	2016-11-01	Illumina MiSeq	uncalculated	uncalculated	Antarctica: Taylor Valley	SAMN24469204	Cryoconite hole water	SAMN24469204	-77.7414	-162.106	Antarctic
PRJNA480849Sample86	SRR17376119	PRJNA480849	5376	182	SAMN24469215	2016-11-01	Illumina MiSeq	uncalculated	uncalculated	Antarctica: Taylor Valley	SAMN24469215	Cryoconite hole water	SAMN24469215	-77.7406	-162.117	Antarctic
PRJNA480849Sample347	SRR17376028	PRJNA480849	6525	299	SAMN24469226	2016-11-01	Illumina MiSeq	uncalculated	uncalculated	Antarctica: Taylor Valley	SAMN24469226	Cryoconite hole water	SAMN24469226	-77.7399	-162.127	Antarctic
PRJNA480849Sample72	SRR17375919	PRJNA480849	7304	331	SAMN24469150	2016-11-01	Illumina MiSeq	uncalculated	uncalculated	Antarctica: Taylor Valley	SAMN24469150	Cryoconite hole water	SAMN24469150	-77.6208	-162.992	Antarctic
PRJNA480849Sample265	SRR17375918	PRJNA480849	5167	268	SAMN24469151	2016-11-01	Illumina MiSeq	uncalculated	uncalculated	Antarctica: Taylor Valley	SAMN24469151	Cryoconite hole water	SAMN24469151	-77.6208	-162.991	Antarctic
PRJNA480849Sample319	SRR17375920	PRJNA480849	7289	604	SAMN24469149	2016-11-01	Illumina MiSeq	uncalculated	uncalculated	Antarctica: Taylor Valley	SAMN24469149	Cryoconite hole water	SAMN24469149	-77.6208	-162.992	Antarctic
PRJNA480849Sample336	SRR17376146	PRJNA480849	5138	255	SAMN24469152	2016-11-01	Illumina MiSeq	uncalculated	uncalculated	Antarctica: Taylor Valley	SAMN24469152	Cryoconite hole water	SAMN24469152	-77.6208	-162.991	Antarctic
PRJNA480849Sample134	SRR17375921	PRJNA480849	5036	207	SAMN24469147	2016-11-01	Illumina MiSeq	uncalculated	uncalculated	Antarctica: Taylor Valley	SAMN24469147	Cryoconite hole water	SAMN24469147	-77.6206	-162.991	Antarctic
PRJNA480849Sample37	SRR17376141	PRJNA480849	5987	361	SAMN24469157	2016-11-01	Illumina MiSeq	uncalculated	uncalculated	Antarctica: Taylor Valley	SAMN24469157	Cryoconite hole water	SAMN24469157	-77.6199	-162.988	Antarctic
PRJNA480849Sample281	SRR17376134	PRJNA480849	7234	331	SAMN24469163	2016-11-01	Illumina MiSeq	uncalculated	uncalculated	Antarctica: Taylor Valley	SAMN24469163	Cryoconite hole water	SAMN24469163	-77.6198	-163.001	Antarctic
PRJNA480849Sample73	SRR17376145	PRJNA480849	7883	541	SAMN24469153	2016-11-01	Illumina MiSeq	uncalculated	uncalculated	Antarctica: Taylor Valley	SAMN24469153	Cryoconite hole water	SAMN24469153	-77.6197	-162.988	Antarctic
PRJNA480849Sample181	SRR17376139	PRJNA480849	6030	365	SAMN24469159	2016-11-01	Illumina MiSeq	uncalculated	uncalculated	Antarctica: Taylor Valley	SAMN24469159	Cryoconite hole water	SAMN24469159	-77.6196	-163.001	Antarctic
PRJNA480849Sample118	SRR17376138	PRJNA480849	6181	367	SAMN24469160	2016-11-01	Illumina MiSeq	uncalculated	uncalculated	Antarctica: Taylor Valley	SAMN24469160	Cryoconite hole water	SAMN24469160	-77.6196	-163.001	Antarctic
PRJNA480849Sample29	SRR17375923	PRJNA480849	11731	444	SAMN24469145	2016-11-01	Illumina MiSeq	uncalculated	uncalculated	Antarctica: Taylor Valley	SAMN24469145	Cryoconite hole water	SAMN24469145	-77.6196	-162.995	Antarctic
PRJNA480849Sample260	SRR17375924	PRJNA480849	5660	273	SAMN24469144	2016-11-01	Illumina MiSeq	uncalculated	uncalculated	Antarctica: Taylor Valley	SAMN24469144	Cryoconite hole water	SAMN24469144	-77.6195	-162.996	Antarctic
PRJNA480849Sample26	SRR17375926	PRJNA480849	5873	454	SAMN24469142	2016-11-01	Illumina MiSeq	uncalculated	uncalculated	Antarctica: Taylor Valley	SAMN24469142	Cryoconite hole water	SAMN24469142	-77.6194	-162.995	Antarctic
PRJNA480849Sample166	SRR17375927	PRJNA480849	5579	410	SAMN24469141	2016-11-01	Illumina MiSeq	uncalculated	uncalculated	Antarctica: Taylor Valley	SAMN24469141	Cryoconite hole water	SAMN24469141	-77.6194	-162.995	Antarctic
PRJNA480849Sample28	SRR17376037	PRJNA480849	5217	385	SAMN24469180	2016-11-01	Illumina MiSeq	uncalculated	uncalculated	Antarctica: Taylor Valley	SAMN24469180	Cryoconite hole water	SAMN24469180	-77.5716	-163.287	Antarctic
PRJNA480849Sample3	SRR17376040	PRJNA480849	6472	450	SAMN24469177	2016-11-01	Illumina MiSeq	uncalculated	uncalculated	Antarctica: Taylor Valley	SAMN24469177	Cryoconite hole water	SAMN24469177	-77.5715	-163.288	Antarctic
PRJNA480849Sample329	SRR17376035	PRJNA480849	8718	455	SAMN24469182	2016-11-01	Illumina MiSeq	uncalculated	uncalculated	Antarctica: Taylor Valley	SAMN24469182	Cryoconite hole water	SAMN24469182	-77.5714	-163.287	Antarctic
PRJNA480849Sample171	SRR17375917	PRJNA480849	5564	508	SAMN24469187	2016-11-01	Illumina MiSeq	uncalculated	uncalculated	Antarctica: Taylor Valley	SAMN24469187	Cryoconite hole water	SAMN24469187	-77.5712	-163.279	Antarctic
PRJNA480849Sample182	SRR17376032	PRJNA480849	8006	721	SAMN24469184	2016-11-01	Illumina MiSeq	uncalculated	uncalculated	Antarctica: Taylor Valley	SAMN24469184	Cryoconite hole water	SAMN24469184	-77.5711	-163.28	Antarctic
PRJNA480849Sample146	SRR17376033	PRJNA480849	8903	761	SAMN24469183	2016-11-01	Illumina MiSeq	uncalculated	uncalculated	Antarctica: Taylor Valley	SAMN24469183	Cryoconite hole water	SAMN24469183	-77.5711	-163.28	Antarctic
PRJNA480849Sample65	SRR17376030	PRJNA480849	7901	392	SAMN24469186	2016-11-01	Illumina MiSeq	uncalculated	uncalculated	Antarctica: Taylor Valley	SAMN24469186	Cryoconite hole water	SAMN24469186	-77.571	-163.279	Antarctic
PRJNA480849Sample83	SRR17376031	PRJNA480849	5644	331	SAMN24469185	2016-11-01	Illumina MiSeq	uncalculated	uncalculated	Antarctica: Taylor Valley	SAMN24469185	Cryoconite hole water	SAMN24469185	-77.571	-163.279	Antarctic
PRJNA480849Sample49	SRR17375913	PRJNA480849	5416	534	SAMN24469191	2016-11-01	Illumina MiSeq	uncalculated	uncalculated	Antarctica: Taylor Valley	SAMN24469191	Cryoconite hole water	SAMN24469191	-77.5701	-163.296	Antarctic
PRJNA480849Sample230	SRR17375909	PRJNA480849	6558	308	SAMN24469194	2016-11-01	Illumina MiSeq	uncalculated	uncalculated	Antarctica: Taylor Valley	SAMN24469194	Cryoconite hole water	SAMN24469194	-77.5701	-163.295	Antarctic
PRJNA480849Sample316	SRR17375914	PRJNA480849	5218	249	SAMN24469190	2016-11-01	Illumina MiSeq	uncalculated	uncalculated	Antarctica: Taylor Valley	SAMN24469190	Cryoconite hole water	SAMN24469190	-77.5699	-163.296	Antarctic
PRJNA480849Sample330	SRR17375915	PRJNA480849	9045	317	SAMN24469189	2016-11-01	Illumina MiSeq	uncalculated	uncalculated	Antarctica: Taylor Valley	SAMN24469189	Cryoconite hole water	SAMN24469189	-77.5699	-163.296	Antarctic
PRJNA480849Sample161	SRR17376043	PRJNA480849	5613	534	SAMN24469173	2016-11-01	Illumina MiSeq	uncalculated	uncalculated	Antarctica: Taylor Valley	SAMN24469173	Cryoconite hole water	SAMN24469173	-77.5699	-163.288	Antarctic
PRJNA480849Sample282	SRR17375904	PRJNA480849	5094	391	SAMN24469200	2016-11-01	Illumina MiSeq	uncalculated	uncalculated	Antarctica: Taylor Valley	SAMN24469200	Cryoconite hole water	SAMN24469200	-77.5685	-163.299	Antarctic
f1202	SRR24287521	PRJNA825340	59886	859	SAMN34229280	2019	Illumina MiSeq	uncalculated	uncalculated	Antarctica	SAMN34229280	Cryoconite hole water	SAMN34229280	-69.4198	-76.225	Antarctic
f1203	SRR24287522	PRJNA825340	73851	2644	SAMN34229279	2019	Illumina MiSeq	uncalculated	uncalculated	Antarctica	SAMN34229279	Cryoconite hole water	SAMN34229279	-69.4198	-76.225	Antarctic
f1204	SRR24287523	PRJNA825340	82551	952	SAMN34229278	2019	Illumina MiSeq	uncalculated	uncalculated	Antarctica	SAMN34229278	Cryoconite hole water	SAMN34229278	-69.4198	-76.225	Antarctic
PRJNA825340Sample6	SRR24287524	PRJNA825340	42512	719	SAMN34229277	2019	Illumina MiSeq	uncalculated	uncalculated	Antarctica	SAMN34229277	Cryoconite hole water	SAMN34229277	-69.4198	-76.225	Antarctic
f1205	SRR24287525	PRJNA825340	82818	638	SAMN34229276	2019	Illumina MiSeq	uncalculated	uncalculated	Antarctica	SAMN34229276	Cryoconite hole water	SAMN34229276	-69.4198	-76.225	Antarctic
f1206	SRR24287526	PRJNA825340	78339	838	SAMN34229275	2019	Illumina MiSeq	uncalculated	uncalculated	Antarctica	SAMN34229275	Cryoconite hole water	SAMN34229275	-69.4198	-76.225	Antarctic
PRJNA825340Sample12	SRR24287527	PRJNA825340	43625	354	SAMN34229274	2019	Illumina MiSeq	uncalculated	uncalculated	Antarctica	SAMN34229274	Cryoconite hole water	SAMN34229274	-69.4198	-76.225	Antarctic
f1207	SRR24287532	PRJNA825340	70217	1061	SAMN34229292	2019	Illumina MiSeq	uncalculated	uncalculated	Antarctica	SAMN34229292	Cryoconite hole water	SAMN34229292	-69.4198	-76.225	Antarctic
f1208	SRR24287533	PRJNA825340	71568	621	SAMN34229291	2019	Illumina MiSeq	uncalculated	uncalculated	Antarctica	SAMN34229291	Cryoconite hole water	SAMN34229291	-69.4198	-76.225	Antarctic
f1209	SRR24287534	PRJNA825340	73485	567	SAMN34229273	2019	Illumina MiSeq	uncalculated	uncalculated	Antarctica	SAMN34229273	Cryoconite hole water	SAMN34229273	-69.4198	-76.225	Antarctic
f1210	SRR24287535	PRJNA825340	86858	633	SAMN34229290	2019	Illumina MiSeq	uncalculated	uncalculated	Antarctica	SAMN34229290	Cryoconite hole water	SAMN34229290	-69.4198	-76.225	Antarctic
f1211	SRR24287536	PRJNA825340	84431	519	SAMN34229289	2019	Illumina MiSeq	uncalculated	uncalculated	Antarctica	SAMN34229289	Cryoconite hole water	SAMN34229289	-69.4198	-76.225	Antarctic
f1212	SRR24287537	PRJNA825340	77465	832	SAMN34229288	2019	Illumina MiSeq	uncalculated	uncalculated	Antarctica	SAMN34229288	Cryoconite hole water	SAMN34229288	-69.4198	-76.225	Antarctic
f1213	SRR24287538	PRJNA825340	69887	825	SAMN34229287	2019	Illumina MiSeq	uncalculated	uncalculated	Antarctica	SAMN34229287	Cryoconite hole water	SAMN34229287	-69.4198	-76.225	Antarctic
f1214	SRR24287539	PRJNA825340	92444	539	SAMN34229286	2019	Illumina MiSeq	uncalculated	uncalculated	Antarctica	SAMN34229286	Cryoconite hole water	SAMN34229286	-69.4198	-76.225	Antarctic
f1215	SRR24287540	PRJNA825340	85274	814	SAMN34229285	2019	Illumina MiSeq	uncalculated	uncalculated	Antarctica	SAMN34229285	Cryoconite hole water	SAMN34229285	-69.4198	-76.225	Antarctic
f1216	SRR24287541	PRJNA825340	77437	830	SAMN34229284	2019	Illumina MiSeq	uncalculated	uncalculated	Antarctica	SAMN34229284	Cryoconite hole water	SAMN34229284	-69.4198	-76.225	Antarctic
f1217	SRR24287542	PRJNA825340	81563	922	SAMN34229283	2019	Illumina MiSeq	uncalculated	uncalculated	Antarctica	SAMN34229283	Cryoconite hole water	SAMN34229283	-69.4198	-76.225	Antarctic
f1218	SRR24287543	PRJNA825340	88715	698	SAMN34229282	2019	Illumina MiSeq	uncalculated	uncalculated	Antarctica	SAMN34229282	Cryoconite hole water	SAMN34229282	-69.4198	-76.225	Antarctic
f1219	SRR24287544	PRJNA825340	76161	552	SAMN34229281	2019	Illumina MiSeq	uncalculated	uncalculated	Antarctica	SAMN34229281	Cryoconite hole water	SAMN34229281	-69.4198	-76.225	Antarctic
f1220	SRR24287545	PRJNA825340	64712	567	SAMN34229272	2019	Illumina MiSeq	uncalculated	uncalculated	Antarctica	SAMN34229272	Cryoconite hole water	SAMN34229272	-69.4198	76.225	Antarctic
f1221	SRR24287546	PRJNA825340	75803	798	SAMN34229271	2019	Illumina MiSeq	uncalculated	uncalculated	Antarctica	SAMN34229271	Cryoconite hole water	SAMN34229271	-69.4198	76.225	Antarctic
PRJNA903689Sample14	SRR22355038	PRJNA903689	26619	1669	SAMN31700408	2018-07-28	Illumina MiSeq	China	Asia	China: Tibetan Plateau	SAMN31700408	cryoconite on the surface of glaicer	SAMN31700408	33.0344	-92.0322	Tibetan Plateau
PRJNA903689Sample11	SRR22355047	PRJNA903689	33261	1315	SAMN31700407	2018-07-28	Illumina MiSeq	China	Asia	China: Tibetan Plateau	SAMN31700407	cryoconite on the surface of glaicer	SAMN31700407	33.0344	-92.0321	Tibetan Plateau
PRJNA903689Sample9	SRR22355048	PRJNA903689	35270	1704	SAMN31700406	2018-07-28	Illumina MiSeq	China	Asia	China: Tibetan Plateau	SAMN31700406	cryoconite on the surface of glaicer	SAMN31700406	33.0344	-92.032	Tibetan Plateau
PRJNA903689Sample18	SRR22355037	PRJNA903689	35272	1698	SAMN31700409	2018-07-28	Illumina MiSeq	China	Asia	China: Tibetan Plateau	SAMN31700409	cryoconite on the surface of glaicer	SAMN31700409	33.0345	-92.0321	Tibetan Plateau
PRJNA903689Sample3	SRR22355035	PRJNA903689	26792	1611	SAMN31700411	2018-07-28	Illumina MiSeq	China	Asia	China: Tibetan Plateau	SAMN31700411	cryoconite on the surface of glaicer	SAMN31700411	33.0346	-92.032	Tibetan Plateau
PRJNA903689Sample13	SRR22355036	PRJNA903689	30195	1650	SAMN31700410	2018-07-28	Illumina MiSeq	China	Asia	China: Tibetan Plateau	SAMN31700410	cryoconite on the surface of glaicer	SAMN31700410	33.0346	-92.0322	Tibetan Plateau
PRJNA903689Sample4	SRR22355034	PRJNA903689	14940	1242	SAMN31700412	2018-07-28	Illumina MiSeq	China	Asia	China: Tibetan Plateau	SAMN31700412	cryoconite on the surface of glaicer	SAMN31700412	33.0347	-92.0321	Tibetan Plateau
PRJNA903689Sample12	SRR22355033	PRJNA903689	24050	1542	SAMN31700413	2018-07-28	Illumina MiSeq	China	Asia	China: Tibetan Plateau	SAMN31700413	cryoconite on the surface of glaicer	SAMN31700413	33.0348	-92.0327	Tibetan Plateau
PRJNA903689Sample16	SRR22355032	PRJNA903689	21324	1407	SAMN31700414	2018-07-28	Illumina MiSeq	China	Asia	China: Tibetan Plateau	SAMN31700414	cryoconite on the surface of glaicer	SAMN31700414	33.0349	-92.0325	Tibetan Plateau
PRJNA903689Sample8	SRR22355045	PRJNA903689	28180	1439	SAMN31700417	2018-07-25	Illumina MiSeq	China	Asia	China: Tibetan Plateau	SAMN31700417	cryoconite on the surface of glaicer	SAMN31700417	33.0611	-92.0048	Tibetan Plateau
PRJNA903689Sample17	SRR22355031	PRJNA903689	28339	1402	SAMN31700415	2018-07-25	Illumina MiSeq	China	Asia	China: Tibetan Plateau	SAMN31700415	cryoconite on the surface of glaicer	SAMN31700415	33.0612	-92.0049	Tibetan Plateau
PRJNA903689Sample2	SRR22355046	PRJNA903689	31875	1509	SAMN31700416	2018-07-25	Illumina MiSeq	China	Asia	China: Tibetan Plateau	SAMN31700416	cryoconite on the surface of glaicer	SAMN31700416	33.0613	-92.005	Tibetan Plateau
PRJNA903689Sample7	SRR22355042	PRJNA903689	26226	1650	SAMN31700420	2018-07-25	Illumina MiSeq	China	Asia	China: Tibetan Plateau	SAMN31700420	cryoconite on the surface of glaicer	SAMN31700420	33.0635	-92.0142	Tibetan Plateau
PRJNA903689Sample6	SRR22355039	PRJNA903689	26191	1279	SAMN31700423	2018-07-25	Illumina MiSeq	China	Asia	China: Tibetan Plateau	SAMN31700423	cryoconite on the surface of glaicer	SAMN31700423	33.0636	-92.0144	Tibetan Plateau
PRJNA903689Sample5	SRR22355044	PRJNA903689	24127	1560	SAMN31700418	2018-07-25	Illumina MiSeq	China	Asia	China: Tibetan Plateau	SAMN31700418	cryoconite on the surface of glaicer	SAMN31700418	33.0636	-92.0143	Tibetan Plateau
PRJNA903689Sample1	SRR22355040	PRJNA903689	33628	1475	SAMN31700422	2018-07-25	Illumina MiSeq	China	Asia	China: Tibetan Plateau	SAMN31700422	cryoconite on the surface of glaicer	SAMN31700422	33.0637	-92.014	Tibetan Plateau
PRJNA903689Sample15	SRR22355043	PRJNA903689	29526	1736	SAMN31700419	2018-07-25	Illumina MiSeq	China	Asia	China: Tibetan Plateau	SAMN31700419	cryoconite on the surface of glaicer	SAMN31700419	33.0637	-92.0144	Tibetan Plateau
PRJNA903689Sample10	SRR22355041	PRJNA903689	36083	1605	SAMN31700421	2018-07-25	Illumina MiSeq	China	Asia	China: Tibetan Plateau	SAMN31700421	cryoconite on the surface of glaicer	SAMN31700421	33.0638	-92.0145	Tibetan Plateau
PRJNA819567Sample9	SRR18554991	PRJNA819567	67754	1512	SAMN26899938	2019-07-01	Illumina NovaSeq 6000	China	Asia	China: Tibetan Plateau\, QY Glacier	SAMN26899938	cryoconite water	SAMN26899938	28.8694	-90.2224	Tibetan Plateau
PRJNA819567Sample29	SRR18554990	PRJNA819567	56193	1453	SAMN26899939	2019-07-01	Illumina NovaSeq 6000	China	Asia	China: Tibetan Plateau\, QY Glacier	SAMN26899939	cryoconite water	SAMN26899939	28.8696	-90.2229	Tibetan Plateau
PRJNA819567Sample7	SRR18554994	PRJNA819567	49925	1355	SAMN26899936	2019-07-01	Illumina NovaSeq 6000	China	Asia	China: Tibetan Plateau\, QY Glacier	SAMN26899936	cryoconite water	SAMN26899936	28.8703	-90.2226	Tibetan Plateau
PRJNA819567Sample24	SRR18554996	PRJNA819567	57134	1636	SAMN26899934	2019-07-01	Illumina NovaSeq 6000	China	Asia	China: Tibetan Plateau\, QY Glacier	SAMN26899934	cryoconite water	SAMN26899934	28.8707	-90.2221	Tibetan Plateau
PRJNA819567Sample32	SRR18554995	PRJNA819567	42560	1239	SAMN26899935	2019-07-01	Illumina NovaSeq 6000	China	Asia	China: Tibetan Plateau\, QY Glacier	SAMN26899935	cryoconite water	SAMN26899935	28.8708	-90.2223	Tibetan Plateau
PRJNA819567Sample21	SRR18554997	PRJNA819567	66172	1656	SAMN26899933	2019-07-01	Illumina NovaSeq 6000	China	Asia	China: Tibetan Plateau\, QY Glacier	SAMN26899933	cryoconite water	SAMN26899933	28.871	-90.2218	Tibetan Plateau
PRJNA819567Sample33	SRR18554993	PRJNA819567	65767	1403	SAMN26899937	2019-07-01	Illumina NovaSeq 6000	China	Asia	China: Tibetan Plateau\, QY Glacier	SAMN26899937	cryoconite water	SAMN26899937	28.8711	-90.2226	Tibetan Plateau
PRJNA819567Sample36	SRR18554998	PRJNA819567	61784	1689	SAMN26899932	2019-07-01	Illumina NovaSeq 6000	China	Asia	China: Tibetan Plateau\, QY Glacier	SAMN26899932	cryoconite water	SAMN26899932	28.8716	-90.2213	Tibetan Plateau
PRJNA819567Sample27	SRR18554967	PRJNA819567	70148	1872	SAMN26899906	2019-07-01	Illumina NovaSeq 6000	China	Asia	China: Tibetan Plateau\, PL4 Glacier	SAMN26899906	cryoconite water	SAMN26899906	29.2528	-96.9316	Tibetan Plateau
PRJNA819567Sample19	SRR18554966	PRJNA819567	63145	2073	SAMN26899907	2019-07-01	Illumina NovaSeq 6000	China	Asia	China: Tibetan Plateau\, PL4 Glacier	SAMN26899907	cryoconite water	SAMN26899907	29.2536	-96.932	Tibetan Plateau
PRJNA629965Sample33	SRR11669326	PRJNA629965	36661	1123	SAMN14814937	2017-08-08	Illumina MiSeq	USA	North America	USA: Montana	SAMN14814937	Glacial Lake	SAMN14814937	48.7531	-113.725	Other alpine regions
PRJNA629965Sample9	SRR11669328	PRJNA629965	49188	1887	SAMN14814936	2017-08-08	Illumina MiSeq	USA	North America	USA: Montana	SAMN14814936	Glacial Lake	SAMN14814936	48.7531	-113.725	Other alpine regions
PRJNA629965Sample46	SRR11669329	PRJNA629965	48696	2453	SAMN14814935	2017-08-08	Illumina MiSeq	USA	North America	USA: Montana	SAMN14814935	Glacial Lake	SAMN14814935	48.7531	-113.725	Other alpine regions
PRJNA905107Sample233	SRR29297424	PRJNA905107	71629	1844	SAMN41675152	2022-08-23	Illumina MiSeq	Canada	North America	Canada: Nunavut	SAMN41675152	glacial melt	SAMN41675152	75.7302	-83.1306	Arctic
PRJNA905107Sample140	SRR29297426	PRJNA905107	75155	1863	SAMN41675151	2022-08-23	Illumina MiSeq	Canada	North America	Canada: Nunavut	SAMN41675151	glacial melt	SAMN41675151	75.7302	-83.1306	Arctic
PRJNA905107Sample5	SRR29297591	PRJNA905107	32403	1923	SAMN41675078	2021-08-16	Illumina MiSeq	Canada	North America	Canada: Nunavut	SAMN41675078	glacial melt	SAMN41675078	75.7302	-83.1306	Arctic
PRJNA905107Sample258	SRR29297590	PRJNA905107	39328	1086	SAMN41675079	2021-08-06	Illumina MiSeq	Canada	North America	Canada: Nunavut	SAMN41675079	glacial melt	SAMN41675079	76.3993	-82.7743	Arctic
PRJNA905107Sample192	SRR29297466	PRJNA905107	40195	1279	SAMN41675114	2022-08-30	Illumina MiSeq	Canada	North America	Canada: Nunavut	SAMN41675114	glacial melt	SAMN41675114	76.4175	-82.8894	Arctic
PRJNA905107Sample22	SRR29297467	PRJNA905107	40367	1671	SAMN41675113	2022-08-30	Illumina MiSeq	Canada	North America	Canada: Nunavut	SAMN41675113	glacial melt	SAMN41675113	76.4175	-82.8894	Arctic
PRJNA905107Sample304	SRR29297461	PRJNA905107	78897	2402	SAMN41675119	2022-08-22	Illumina MiSeq	Canada	North America	Canada: Nunavut	SAMN41675119	glacial melt	SAMN41675119	76.4603	-82.5337	Arctic
PRJNA905107Sample92	SRR29297468	PRJNA905107	82077	1498	SAMN41675112	2022-08-13	Illumina MiSeq	Canada	North America	Canada: Nunavut	SAMN41675112	glacial melt	SAMN41675112	76.5498	-81.2526	Arctic
PRJNA905107Sample218	SRR29297409	PRJNA905107	48624	2152	SAMN41675111	2022-08-13	Illumina MiSeq	Canada	North America	Canada: Nunavut	SAMN41675111	glacial melt	SAMN41675111	76.5652	-81.2211	Arctic
PRJNA905107Sample323	SRR29297410	PRJNA905107	26905	2076	SAMN41675110	2022-08-13	Illumina MiSeq	Canada	North America	Canada: Nunavut	SAMN41675110	glacial melt	SAMN41675110	76.6068	-81.1213	Arctic
PRJNA905107Sample89	SRR29297411	PRJNA905107	74531	2334	SAMN41675109	2022-08-13	Illumina MiSeq	Canada	North America	Canada: Nunavut	SAMN41675109	glacial melt	SAMN41675109	76.7094	-81.0312	Arctic
PRJNA905107Sample204	SRR29297414	PRJNA905107	11851	1202	SAMN41675108	2022-08-13	Illumina MiSeq	Canada	North America	Canada: Nunavut	SAMN41675108	glacial melt	SAMN41675108	76.7247	-81.0251	Arctic
PRJNA629965Sample27	SRR11669343	PRJNA629965	17109	1361	SAMN14814922	2019-09-19	Illumina MiSeq	USA	North America	USA: Oregon	SAMN14814922	Glacial Melt	SAMN14814922	45.3935	-121.662	Other alpine regions
PRJNA629965Sample24	SRR11669258	PRJNA629965	13902	1864	SAMN14814920	2019-09-19	Illumina MiSeq	USA	North America	USA: Oregon	SAMN14814920	Glacial Melt	SAMN14814920	45.3937	-121.663	Other alpine regions
PRJNA629965Sample48	SRR11669341	PRJNA629965	19342	2037	SAMN14814924	2019-09-19	Illumina MiSeq	USA	North America	USA: Oregon	SAMN14814924	Glacial Melt	SAMN14814924	45.3945	-121.664	Other alpine regions
f1268	SRR3667410	PRJNA322651	48117	667	SAMN05179533	2011-06-21	Illumina MiSeq	Greenland	Greenland	Greenland Cryoconite Hole Water1	SAMN05179533	Greenland Cryoconite Hole Water1	SAMN05179533	69.576	-49.812	Arctic
f1269	SRR3667411	PRJNA322651	22375	530	SAMN05179534	2011-06-21	Illumina MiSeq	Greenland	Greenland	Greenland Cryoconite Hole Water2	SAMN05179534	Greenland Cryoconite Hole Water2	SAMN05179534	69.576	-49.812	Arctic
f1270	SRR3667412	PRJNA322651	44117	551	SAMN05179535	2011-06-21	Illumina MiSeq	Greenland	Greenland	Greenland Cryoconite Hole Water3	SAMN05179535	Greenland Cryoconite Hole Water3	SAMN05179535	69.576	-49.812	Arctic
f1271	SRR3667413	PRJNA322651	77219	635	SAMN05179536	2011-06-21	Illumina MiSeq	Greenland	Greenland	Greenland Cryoconite Hole Water4	SAMN05179536	Greenland Cryoconite Hole Water4	SAMN05179536	69.576	-49.812	Arctic
f1272	SRR3667414	PRJNA322651	42877	834	SAMN05179537	2011-06-21	Illumina MiSeq	Greenland	Greenland	Greenland Cryoconite Hole Water5	SAMN05179537	Greenland Cryoconite Hole Water5	SAMN05179537	69.576	-49.812	Arctic
f1273	SRR3667415	PRJNA322651	49996	208	SAMN05179538	2011-06-21	Illumina MiSeq	Greenland	Greenland	Greenland Cryoconite Hole Water6	SAMN05179538	Greenland Cryoconite Hole Water6	SAMN05179538	69.576	-49.812	Arctic
f1274	SRR3667416	PRJNA322651	48290	619	SAMN05179539	2011-06-21	Illumina MiSeq	Greenland	Greenland	Greenland Cryoconite Hole Water7	SAMN05179539	Greenland Cryoconite Hole Water7	SAMN05179539	69.576	-49.812	Arctic
f1276	SRR3667418	PRJNA322651	47370	852	SAMN05179540	2011-06-21	Illumina MiSeq	Greenland	Greenland	Greenland Cryoconite Hole Water8	SAMN05179540	Greenland Cryoconite Hole Water8	SAMN05179540	69.576	-49.812	Arctic
f1277	SRR3667419	PRJNA322651	54475	368	SAMN05179541	2011-06-21	Illumina MiSeq	Greenland	Greenland	Greenland Cryoconite Hole Water9	SAMN05179541	Greenland Cryoconite Hole Water9	SAMN05179541	69.576	-49.812	Arctic
f1262	SRR3667404	PRJNA322651	65686	611	SAMN05179528	2011-06-13	Illumina MiSeq	Greenland	Greenland	Greenland Supraglacial Lake1	SAMN05179528	Greenland Supraglacial Lake1	SAMN05179528	69.573	-49.805	Arctic
f1263	SRR3667405	PRJNA322651	58655	743	SAMN05179529	2011-06-13	Illumina MiSeq	Greenland	Greenland	Greenland Supraglacial Lake2	SAMN05179529	Greenland Supraglacial Lake2	SAMN05179529	69.573	-49.805	Arctic
f1265	SRR3667407	PRJNA322651	42931	754	SAMN05179530	2011-06-13	Illumina MiSeq	Greenland	Greenland	Greenland Supraglacial Lake3	SAMN05179530	Greenland Supraglacial Lake3	SAMN05179530	69.589	-49.783	Arctic
f1266	SRR3667408	PRJNA322651	50736	621	SAMN05179531	2011-06-13	Illumina MiSeq	Greenland	Greenland	Greenland Supraglacial Lake4	SAMN05179531	Greenland Supraglacial Lake4	SAMN05179531	69.589	-49.783	Arctic
f1267	SRR3667409	PRJNA322651	63031	665	SAMN05179532	2011-06-13	Illumina MiSeq	Greenland	Greenland	Greenland Supraglacial Lake5	SAMN05179532	Greenland Supraglacial Lake5	SAMN05179532	69.589	-49.783	Arctic
f1475	SRR8931974	PRJNA533649	98952	266	SAMN11464312	2015-12-01	Illumina MiSeq	Pakistan	Asia	Pakistan: Batura glacier\, Hunza	SAMN11464312	Meltwater	SAMN11464312	36.32	74.4	Tibetan Plateau
PRJNA629965Sample1	SRR11669293	PRJNA629965	34836	2910	SAMN14814888	2017-07-26	Illumina MiSeq	USA	North America	USA: Oregon	SAMN14814888	Meltwater	SAMN14814888	45.2409	-121.505	Other alpine regions
PRJNA629965Sample62	SRR11669345	PRJNA629965	25245	2321	SAMN14814868	2016-10-10	Illumina MiSeq	USA	North America	USA: Oregon	SAMN14814868	Meltwater	SAMN14814868	45.2409	-121.505	Other alpine regions
PRJNA629965Sample32	SRR11669346	PRJNA629965	18579	2722	SAMN14814867	2016-10-10	Illumina MiSeq	USA	North America	USA: Oregon	SAMN14814867	Meltwater	SAMN14814867	45.2409	-121.505	Other alpine regions
PRJNA629965Sample51	SRR11669260	PRJNA629965	12863	3017	SAMN14814918	2019-09-17	Illumina MiSeq	USA	North America	USA: Oregon	SAMN14814918	Meltwater	SAMN14814918	45.2765	-121.693	Other alpine regions
PRJNA629965Sample88	SRR11669291	PRJNA629965	16500	2438	SAMN14814890	2017-07-26	Illumina MiSeq	USA	North America	USA: Oregon	SAMN14814890	Meltwater	SAMN14814890	45.2774	-121.693	Other alpine regions
PRJNA629965Sample54	SRR11669292	PRJNA629965	36838	3147	SAMN14814889	2017-07-26	Illumina MiSeq	USA	North America	USA: Oregon	SAMN14814889	Meltwater	SAMN14814889	45.2774	-121.693	Other alpine regions
PRJNA629965Sample45	SRR11669316	PRJNA629965	16769	2693	SAMN14814875	2016-10-10	Illumina MiSeq	USA	North America	USA: Oregon	SAMN14814875	Meltwater	SAMN14814875	45.29	-121.584	Other alpine regions
PRJNA629965Sample31	SRR11669327	PRJNA629965	22614	3557	SAMN14814874	2016-10-10	Illumina MiSeq	USA	North America	USA: Oregon	SAMN14814874	Meltwater	SAMN14814874	45.29	-121.584	Other alpine regions
PRJNA629965Sample41	SRR11669287	PRJNA629965	22345	1993	SAMN14814894	2017-07-26	Illumina MiSeq	USA	North America	USA: Oregon	SAMN14814894	Meltwater	SAMN14814894	45.2952	-121.734	Other alpine regions
PRJNA629965Sample89	SRR11669288	PRJNA629965	18256	2346	SAMN14814893	2017-07-26	Illumina MiSeq	USA	North America	USA: Oregon	SAMN14814893	Meltwater	SAMN14814893	45.2952	-121.734	Other alpine regions
PRJNA629965Sample83	SRR11669265	PRJNA629965	17589	1511	SAMN14814914	2019-09-16	Illumina MiSeq	USA	North America	USA: Oregon	SAMN14814914	Meltwater	SAMN14814914	45.2954	-121.739	Other alpine regions
PRJNA629965Sample44	SRR11669267	PRJNA629965	18032	2425	SAMN14814912	2019-09-15	Illumina MiSeq	USA	North America	USA: Oregon	SAMN14814912	Meltwater	SAMN14814912	45.296	-121.74	Other alpine regions
PRJNA629965Sample52	SRR11669264	PRJNA629965	13749	2660	SAMN14814915	2019-09-16	Illumina MiSeq	USA	North America	USA: Oregon	SAMN14814915	Meltwater	SAMN14814915	45.2964	-121.738	Other alpine regions
PRJNA629965Sample6	SRR11669266	PRJNA629965	21051	4124	SAMN14814913	2019-09-15	Illumina MiSeq	USA	North America	USA: Oregon	SAMN14814913	Meltwater	SAMN14814913	45.2966	-121.74	Other alpine regions
PRJNA629965Sample20	SRR11669305	PRJNA629965	8810	1976	SAMN14814876	2016-10-10	Illumina MiSeq	USA	North America	USA: Oregon	SAMN14814876	Meltwater	SAMN14814876	45.3035	-121.608	Other alpine regions
PRJNA629965Sample87	SRR11669344	PRJNA629965	17598	1974	SAMN14814877	2016-10-10	Illumina MiSeq	USA	North America	USA: Oregon	SAMN14814877	Meltwater	SAMN14814877	45.3035	-121.608	Other alpine regions
PRJNA629965Sample43	SRR11669290	PRJNA629965	42273	2980	SAMN14814891	2017-07-27	Illumina MiSeq	USA	North America	USA: Oregon	SAMN14814891	Meltwater	SAMN14814891	45.3143	-121.738	Other alpine regions
PRJNA629965Sample57	SRR11669269	PRJNA629965	16853	2330	SAMN14814910	2017-07-27	Illumina MiSeq	USA	North America	USA: Oregon	SAMN14814910	Meltwater	SAMN14814910	45.3171	-121.718	Other alpine regions
PRJNA629965Sample56	SRR11669271	PRJNA629965	5648	789	SAMN14814908	2017-07-27	Illumina MiSeq	USA	North America	USA: Oregon	SAMN14814908	Meltwater	SAMN14814908	45.3177	-121.755	Other alpine regions
PRJNA629965Sample29	SRR11669270	PRJNA629965	11331	2156	SAMN14814909	2017-07-27	Illumina MiSeq	USA	North America	USA: Oregon	SAMN14814909	Meltwater	SAMN14814909	45.3187	-121.723	Other alpine regions
PRJNA629965Sample68	SRR11669276	PRJNA629965	10146	1197	SAMN14814904	2017-07-27	Illumina MiSeq	USA	North America	USA: Oregon	SAMN14814904	Meltwater	SAMN14814904	45.3358	-121.707	Other alpine regions
PRJNA629965Sample4	SRR11669277	PRJNA629965	23898	2230	SAMN14814903	2017-07-27	Illumina MiSeq	USA	North America	USA: Oregon	SAMN14814903	Meltwater	SAMN14814903	45.3358	-121.707	Other alpine regions
PRJNA629965Sample58	SRR11669263	PRJNA629965	18426	3216	SAMN14814916	2019-09-16	Illumina MiSeq	USA	North America	USA: Oregon	SAMN14814916	Meltwater	SAMN14814916	45.3361	-121.671	Other alpine regions
PRJNA629965Sample55	SRR11669282	PRJNA629965	25004	2956	SAMN14814898	2017-07-25	Illumina MiSeq	USA	North America	USA: Oregon	SAMN14814898	Meltwater	SAMN14814898	45.3399	-121.94	Other alpine regions
PRJNA629965Sample86	SRR11669283	PRJNA629965	21281	2883	SAMN14814897	2017-07-25	Illumina MiSeq	USA	North America	USA: Oregon	SAMN14814897	Meltwater	SAMN14814897	45.3399	-121.94	Other alpine regions
PRJNA629965Sample3	SRR11669272	PRJNA629965	58596	1689	SAMN14814907	2017-07-29	Illumina MiSeq	USA	North America	USA: Oregon	SAMN14814907	Meltwater	SAMN14814907	45.3417	-121.739	Other alpine regions
PRJNA629965Sample35	SRR11669274	PRJNA629965	16144	872	SAMN14814906	2017-07-29	Illumina MiSeq	USA	North America	USA: Oregon	SAMN14814906	Meltwater	SAMN14814906	45.3417	-121.739	Other alpine regions
PRJNA629965Sample63	SRR11669275	PRJNA629965	37120	2020	SAMN14814905	2017-07-29	Illumina MiSeq	USA	North America	USA: Oregon	SAMN14814905	Meltwater	SAMN14814905	45.3417	-121.739	Other alpine regions
PRJNA629965Sample18	SRR11669268	PRJNA629965	28757	2152	SAMN14814911	2017-07-29	Illumina MiSeq	USA	North America	USA: Oregon	SAMN14814911	Meltwater	SAMN14814911	45.3458	-121.739	Other alpine regions
PRJNA629965Sample76	SRR11669278	PRJNA629965	14781	839	SAMN14814902	2017-07-23	Illumina MiSeq	USA	North America	USA: Oregon	SAMN14814902	Meltwater	SAMN14814902	45.3531	-121.649	Other alpine regions
PRJNA629965Sample70	SRR11669279	PRJNA629965	34198	1606	SAMN14814901	2017-07-23	Illumina MiSeq	USA	North America	USA: Oregon	SAMN14814901	Meltwater	SAMN14814901	45.3531	-121.649	Other alpine regions
PRJNA629965Sample25	SRR11669302	PRJNA629965	13400	2592	SAMN14814880	2016-10-09	Illumina MiSeq	USA	North America	USA: Oregon	SAMN14814880	Meltwater	SAMN14814880	45.3531	-121.65	Other alpine regions
PRJNA629965Sample53	SRR11669339	PRJNA629965	18012	3265	SAMN14814926	2019-09-20	Illumina MiSeq	USA	North America	USA: Oregon	SAMN14814926	Meltwater	SAMN14814926	45.3931	-121.659	Other alpine regions
PRJNA629965Sample79	SRR11669338	PRJNA629965	12822	1119	SAMN14814873	2016-10-08	Illumina MiSeq	USA	North America	USA: Oregon	SAMN14814873	Meltwater	SAMN14814873	45.3937	-121.659	Other alpine regions
PRJNA629965Sample7	SRR11669261	PRJNA629965	15632	2852	SAMN14814917	2019-09-16	Illumina MiSeq	USA	North America	USA: Oregon	SAMN14814917	Meltwater	SAMN14814917	45.3949	-121.57	Other alpine regions
PRJNA629965Sample15	SRR11669304	PRJNA629965	15625	3264	SAMN14814878	2016-10-08	Illumina MiSeq	USA	North America	USA: Oregon	SAMN14814878	Meltwater	SAMN14814878	45.4438	-121.58	Other alpine regions
PRJNA629965Sample59	SRR11669286	PRJNA629965	12999	2459	SAMN14814895	2017-07-26	Illumina MiSeq	USA	North America	USA: Oregon	SAMN14814895	Meltwater	SAMN14814895	45.4524	-121.653	Other alpine regions
PRJNA629965Sample47	SRR11669281	PRJNA629965	33815	2485	SAMN14814899	2017-07-25	Illumina MiSeq	USA	North America	USA: Oregon	SAMN14814899	Meltwater	SAMN14814899	45.4907	-121.754	Other alpine regions
PRJNA629965Sample34	SRR11669310	PRJNA629965	23784	1610	SAMN14814952	2017-08-12	Illumina MiSeq	USA	North America	USA: Montana	SAMN14814952	Meltwater	SAMN14814952	48.5095	-114.024	Other alpine regions
PRJNA629965Sample73	SRR11669336	PRJNA629965	22375	2220	SAMN14814928	2017-08-12	Illumina MiSeq	USA	North America	USA: Montana	SAMN14814928	Meltwater	SAMN14814928	48.6765	-113.81	Other alpine regions
PRJNA629965Sample14	SRR11669311	PRJNA629965	19033	762	SAMN14814951	2017-08-06	Illumina MiSeq	USA	North America	USA: Montana	SAMN14814951	Meltwater	SAMN14814951	48.6819	-113.733	Other alpine regions
PRJNA629965Sample78	SRR11669323	PRJNA629965	8457	1739	SAMN14814940	2017-08-06	Illumina MiSeq	USA	North America	USA: Montana	SAMN14814940	Meltwater	SAMN14814940	48.688	-113.737	Other alpine regions
PRJNA629965Sample12	SRR11669321	PRJNA629965	7004	816	SAMN14814942	2017-08-12	Illumina MiSeq	USA	North America	USA: Montana	SAMN14814942	Meltwater	SAMN14814942	48.6988	-113.705	Other alpine regions
PRJNA629965Sample71	SRR11669322	PRJNA629965	48960	1797	SAMN14814941	2017-08-12	Illumina MiSeq	USA	North America	USA: Montana	SAMN14814941	Meltwater	SAMN14814941	48.6988	-113.705	Other alpine regions
PRJNA629965Sample65	SRR11669315	PRJNA629965	40925	2803	SAMN14814947	2017-08-07	Illumina MiSeq	USA	North America	USA: Montana	SAMN14814947	Meltwater	SAMN14814947	48.7008	-113.691	Other alpine regions
PRJNA629965Sample90	SRR11669317	PRJNA629965	13244	2374	SAMN14814946	2017-08-07	Illumina MiSeq	USA	North America	USA: Montana	SAMN14814946	Meltwater	SAMN14814946	48.7008	-113.691	Other alpine regions
PRJNA629965Sample42	SRR11669331	PRJNA629965	18490	1375	SAMN14814933	2017-08-07	Illumina MiSeq	USA	North America	USA: Montana	SAMN14814933	Meltwater	SAMN14814933	48.7031	-113.694	Other alpine regions
PRJNA629965Sample50	SRR11669332	PRJNA629965	16474	595	SAMN14814932	2017-08-07	Illumina MiSeq	USA	North America	USA: Montana	SAMN14814932	Meltwater	SAMN14814932	48.7031	-113.694	Other alpine regions
PRJNA629965Sample81	SRR11669333	PRJNA629965	31006	2103	SAMN14814931	2017-08-07	Illumina MiSeq	USA	North America	USA: Montana	SAMN14814931	Meltwater	SAMN14814931	48.7031	-113.694	Other alpine regions
PRJNA629965Sample38	SRR11669312	PRJNA629965	18540	1882	SAMN14814950	2017-08-11	Illumina MiSeq	USA	North America	USA: Montana	SAMN14814950	Meltwater	SAMN14814950	48.7166	-113.694	Other alpine regions
PRJNA629965Sample10	SRR11669313	PRJNA629965	18085	2002	SAMN14814949	2017-08-11	Illumina MiSeq	USA	North America	USA: Montana	SAMN14814949	Meltwater	SAMN14814949	48.7166	-113.694	Other alpine regions
PRJNA629965Sample30	SRR11669309	PRJNA629965	37821	1473	SAMN14814953	2017-08-09	Illumina MiSeq	USA	North America	USA: Montana	SAMN14814953	Meltwater	SAMN14814953	48.7282	-113.729	Other alpine regions
PRJNA629965Sample67	SRR11669330	PRJNA629965	12836	1066	SAMN14814934	2017-08-09	Illumina MiSeq	USA	North America	USA: Montana	SAMN14814934	Meltwater	SAMN14814934	48.7381	-113.727	Other alpine regions
PRJNA629965Sample17	SRR11669325	PRJNA629965	5805	1063	SAMN14814938	2017-08-10	Illumina MiSeq	USA	North America	USA: Montana	SAMN14814938	Meltwater	SAMN14814938	48.7517	-113.807	Other alpine regions
[truncated: 41 more rows]

## Sheet: Table S2
Table S2 Bioproject information on amplicon sequencing data
Project ID	Project description	Publication	Publication DOI	Primers used	Region amplified	sequencing platform		BioProject
PRJNA1090395	Bacterial Diversity of the lakes and Glaciers of Larsemann Hills	Liu et al., 2024 (in chinese)	10.13343/j.cnki.wsxb.20240192	338F (5′-ACTCCTACGGGAGGCAGCAG-3′)和806R (5′-GGACTACHVGGGTWTCTAAT-3′)	V3V4	unspecified		PRJNA629965
PRJNA533649	Bacterial diversity of ice, water and sediment from Batura glacier in Pakistan	Ali et al., 2021	10.1007/s10123-020-00153-x	5′ GTGCCAGCMGCCGCGGTAA) and reverse primer (5′ GGACTACHVGGGTWTCTAAT	V3V4	MiSeq using paired 300-bp		PRJEB14999
PRJNA320505	Cryoconite holes from Ecology Galcier, Antarctica metagenome	Bowmann	10.3389/fmicb.2018.03165	341F (5′-CCTACGGGNGGCWGCAG) and 785R (5′-GACTACHVGGGTATCTAATCC)	V3V4	unspecified		PRJNA564214
PRJNA681925	Microbiome survey of the Ice-capped Cayambe Volcanic Complex in Ecuador (Ecuadorian Microbiome Project)	Diaz et al., 2023	10.3389/fmicb.2023.1154815	341F (5′-CCTACGGGNGGCWGCAG) and 785R (5′-GACTACHVGGGTATCTAATCC)	V3V4	MiSeq using paired 300-bp		PRJNA384269
PRJNA636650	Antarctic glacier snowpack Raw sequence reads	Hodson et al., 2021	10.1029/2020JG005706	S-D-Bact-0341-b-S-17 forward and S-D-Bact-0785-a-A-21 reverse	V3V4	MiSeq using paired 300-bp		PRJNA1071093
PRJNA844291	Seasonal Variation of the Atmospheric Bacterial Community in the Greenlandic High Arctic Is Influenced by Weather Events and Local and Distant Sources	Jensen et al., 2022	10.3389/fmicb.2022.909980	Bac341F (5′-CCT ACG GGN GGC WGC AG-3′) and Bac805R (5′-GAC TAC HVG GGT ATC TAA TCC-3′).	V3V4	MiSeq using paired 300-bp		PRJNA282540
PRJEB29215	Spatial variability in Antarctic surface snow bacterial communities	Malard et al., 2019	10.3389/fmicb.2019.00461	341F and 785R	V3V4	MiSeq		PRJNA564341
PRJNA678168	16S rDNA data from sediment-rich basal ice in three glaciers in South East Iceland.	Toubes-Rodrigo et al., 2021	10.1002/mbo3.1200	357F primer (5’-CCTACGGGNGGCWGCAG-3’) and 785R primer (5’-GACTACHVGGGTATCTAATCC-3’)	V3V4	MiSeq using paired 300-bp		PRJNA678168
PRJDB8807	The cryoconite granule structure reveal nitrogen cycling in glacier ecosystems	unpublished	unpublished	341F (5′-CCTACGGGNGGCWGCAG) and 785R (5′-GACTACHVGGGTATCTAATCC)	V3V4	unspecified		PRJNA681925
PRJNA309355	Subalpine snowpack Targeted loci environmental	unpublished	unpublished	341F (5′-CCTACGGGNGGCWGCAG) and 785R (5′-GACTACHVGGGTATCTAATCC)	V3V4	Illumina MiSeq		PRJNA322651
PRJNA318626	Greenland Ice Sheet - A sequence based temporal-spatial study	unpublished	unpublished	341F (5′-CCTACGGGNGGCWGCAG) and 785R (5′-GACTACHVGGGTATCTAATCC)	V3V4	MiSeq		PRJNA480849
PRJEB14999	Nitrate addition has minimal short-term affects on Greenland ice sheet supraglacial prokaryotes.	Cameron et al., 2017	10.1111/1758-2229.12510	341F (5’-CCTACGGGAGGCAGCAG-3’) and 518R (5’-ATTACCGCGGCTGCTGG-3’; Muyzer et al., 1993)	V3V4	unspecified		PRJDB7127
PRJNA942590	Greenland Ice Sheet supraglacial habitats: ice, cryoconite, biofilm, snow Genome sequencing and assembly	Jaarsma et al., 2023	10.1093/femsec/fiad119	341F/806R	V3V4	MiSeq platform (v2 chemistry, 2×250 bp		PRJNA997912
PRJEB9658	Assessment of community structures along the depth profile of an alpine snowpack in winter and at snowmelt	unpublished	unpublished	341F (5’-CCTACGGGAGGCAGCAG-3’) and 518R (5’-ATTACCGCGGCTGCTGG-3’; Muyzer et al., 1993)	V3V4	unspecified		PRJDB8807
PRJNA322651	Microbial communities in Antarctic and Greenlandic glacial ecosystems fed by glacial meltwater	unpublished	unpublished	341F (5’-CCTACGGGAGGCAGCAG-3’) and 518R (5’-ATTACCGCGGCTGCTGG-3’; Muyzer et al., 1993)	V3V4	Illumina MiSeq		PRJDB7285
PRJEB9478	Bacterial composition and survival on Sahara dust particles transported to the European Alps	Moela et al., 2015	10.3389/fmicb.2015.01454	341F (Accession Number pB-03844) 5′-CCTACGGGNGGCWGCAG-3′ and universal reversed primer Bakt_805R (pB-03845): 5′-GACTACHVGGGTATCTAATCC-3′ (Herlemann et al., 2011)	V3V4	MiSeq using paired 300-bp		PRJNA509012
PRJEB40002	Glacial surface microbial communities from clear and cloudy ice	Varliero et al., 2021	10.1017/jog.2021.30	Pro341F and Pro805R	V3V4	MiSeq using paired 300-bp		PRJNA318626
PRJDB7127	Snow Impurity and Glacial Microbe effects on abrupt warming in the Arctic	unpublished	unpublished	Pro341F and Pro805R	V3V4	unspecified		PRJNA942590
PRJDB7285	Bacterial diversity in Austre Br?ggerbreen and glacier foreland soil	unpublished	unpublished	Pro341F and Pro805R	V3V4	unspecified		PRJEB8981
PRJNA589711	Microbial Ecology of equatorial Lewis Glacier, Kenya	unpublished	unpublished	341F, 805R	V3V4	Illumina MiSeq		PRJNA1126602
PRJNA296701	Cryoconite sediment Raw sequence reads	Webster-Brown et al., 2015	10.1093/femsec/fiv144	515F and 806R	V3V4	MiSeq platform (v2 chemistry, 2×250 bp		PRJNA514205
PRJNA430179	glacier metagenome Genome sequencing	Martinez-Alonso et al., 2019	10.1038/s41598-019-47994-9	341F, 5′-ACACTGACGACATGGTTCTACACCTACGGGNGGCWGCAG-3′ and (V3-V4) 805R, 5′-TACGGTAGCAGAGACTTGGTCTGACTACHVGGGTATCTAATCC-3′	V3V4	MiSeq using paired 300-bp		PRJNA589711
PRJNA1126602	Microbiome of Altai cryoconites	unpublished	unpublished	341F/806R	V3V4	MiSeq Sequencer		PRJNA668398
PRJNA633749	glacier metagenome Targeted loci environmental	Rathore et al., 2021	10.1111/1758-2229.13017	341 Forward: 5′ CCTACGGGAGGCAGCAG 3′ and 518 Reverse: 5′ ATTACCGCGGCTGCTGG 3′	V3V4	MiSeq platform (v2 chemistry, 2×250 bp		PRJEB16145
PRJNA893676	Greenland (Sermilik Station) 2019 - Microbial Characterization Raw sequence reads	unpublished	unpublished	341F (5-CCTACGGGNGGCWGCAG) and 785R (5-GACTACHVGGGTATCTAATCC)	V3V4	Illumina MiSeq		PRJNA296701
PRJNA657180	snow and ice metagenome Targeted loci environmental	Winkel et al., 2022	10.3389/fmicb.2022.876848	S-D-Bact-0341-b-S-17 (5′-CCTACGGGNGGCWGCAG-3′) and S-D-Bact-0785-a-A-21 (5′-GACTACHVGGGTATCTAATCC-3′; Herlemann et al., 2011)	V3V4	MiSeq using paired 300-bp		PRJNA483479
PRJNA825340	20. Microbial Diversity of Cryoconite Holes	Sanyal et al., 2024	10.1007/s12275-024-00140-1	515F (5′-GTGCCAGCMGCCGCGGTAA-3′) (Apprill et al., 2015) and 806R (5′-GGACTACNVGGGTWTCTAAT-3′)	V4	MiSeq PE300		PRJNA633749
PRJNA997912	29. Prokaryotic communities of the cryoconite holes from the glaciers of the Arctic, Antarctic, and Central Caucasus	Gladkov et al., 2023	10.21203/rs.3.rs-3313107/v1	515F (5′-GTGCCAGCMGCCGCGGTAA-3′) (Apprill et al., 2015) and 806R (5′-GGACTACNVGGGTWTCTAAT-3′)	V4	Miseq		PRJNA320505
PRJNA702009	16. Antarctic snow algae survey	Ji et al., 2021	10.1111/nph.17764	515F (5′-GTGCCAGCMGCCGCGGTAA-3′) (Apprill et al., 2015) and 806R (5′-GGACTACNVGGGTWTCTAAT-3′)	V4	Illumina HiSeq 2500		PRJNA529498
PRJNA629965	13. Glacial melt is a prominent source of recharge for alpine springs in the Northwestern U.S.	Miller et al., 2021	10.1088/1748-9326/abf06b	515F (5′-GTGCCAGCMGCCGCGGTAA-3′) (Apprill et al., 2015) and 806R (5′-GGACTACNVGGGTWTCTAAT-3′)	V4	MiSeq Illumina 2 × 300 bp		PRJNA825340
PRJNA991501	27. Seasonality is the main determinant of microbial diversity associated to snow/ice around Concordia Station on the Antarctic Polar Plateau	Stoppiello et al., 2023	10.3390/biology12091193	515F (5′-GTGCCAGCMGCCGCGGTAA-3′) (Apprill et al., 2015) and 806R (5′-GGACTACNVGGGTWTCTAAT-3′)	V4	MiSeq using paired 300-bp		PRJNA819567
PRJNA997782	28. Glaciers Metagenome	Amin et al., 2024	10.1186/s13568-024-01750-z	F515 (GTGCCAGCMGCCGCGGTAA)/R806 (GGACTACHVGGGTWTCTAAT)	V4	Illumina Nova 6000 PE250		PRJNA430887
PRJNA903689	23. Cryoconite Raw sequence reads	unpublished	unpublished	F515 (GTGCCAGCMGCCGCGGTAA)/R806 (GGACTACHVGGGTWTCTAAT)	V4	Illumina Miseq		PRJNA396245
PRJNA884890	22. Ice core Raw sequence reads	Liu et al., 2024	10.1007/s11430-022-1282-x	F515 (GTGCCAGCMGCCGCGGTAA)/R806 (GGACTACHVGGGTWTCTAAT)	V4	MiSeq using paired 300-bp		PRJNA430179
PRJNA808682	18. Microbial diversity in terrestrial and marine habitats from Antarctica	Bendia et al., 2023	10.1590/0001-3765202320211442	515F (5’-GTGYCAGCMGCCGCGGTAA-3’) and 806R (5’-GGACTACNVGGGTWTCTAAT-3’)	V4	MiSeq using paired 300-bp		PRJNA636650
PRJNA564341	12. Devon Ice Cap microbiology	Dubnick et al., 2020	10.5194/bg-17-963-2020	515F (5’-GTGYCAGCMGCCGCGGTAA-3’) and 806R (5’-GGACTACNVGGGTWTCTAAT-3’)	V4	MiSeq platform (v2 chemistry, 2×250 bp		PRJNA189054
PRJNA905107	24. Ice to Ocean	Roberts et al., 2024	10.1002/lno.12525	515F (5’-GTGYCAGCMGCCGCGGTAA-3’) and 806R (5’-GGACTACNVGGGTWTCTAAT-3’)	V4	2 × 250 cycle MiSeq		PRJNA243903
PRJNA819567	19. Cryoconite habitat bacteria Metagenome	unpublished	unpublished	515F (5’-GTGYCAGCMGCCGCGGTAA-3’) and 806R (5’-GGACTACNVGGGTWTCTAAT-3’)	V4	Illumina NovaSeq 6000		PRJNA893676
PRJNA948675	25. Uapishka Genome sequencing and assembly	unpublished	unpublished	515F (5’-GTGYCAGCMGCCGCGGTAA-3’) and 806R (5’-GGACTACNVGGGTWTCTAAT-3’)	V4	Illumina Miseq		PRJNA980660
PRJNA872833	21. Analysis of the microbial diversity of the surface snow from Glacier No. 1 at Headwaters of Urumqi River, Tianshan Mountains	Zhang et al., 2023 (in chinese)		338F（ACTCCTACGGGAGGCAGCA）和806R（GGACTACHVGGGTWTCTAAT）	V4	Illumina Nova 6000		PRJNA657180
[truncated: 26 more rows]

## Sheet: Table S3
Table S3 Site description of metegenome data
SampleID	Bioproject id	Habitat_type	Region	Glacier name	Sampling time	Source
[truncated: 236 more rows]

## Sheet: Table S4
Table S4 Information of genomes from Cultivated bacteria
[truncated: 1,000 more rows]

[truncated: 11 more sheets: Table S7, Table S8, Table S9, Table S10, Table S11, Table S12, Table S13, Table S14, Table S15, Table S16, Table S17]
