# Supplementary material for: A database of glacier prokaryotic genomes and genes for the Three Poles
Source: Copernicus journal article supplement (doi:10.5194/essd-17-5165-2025), 2025-10-07
Supplement: Supplementary file [file essd-17-5165-2025-supplement-title-page.pdf › essd-17-5165-2025-supplement-title-page.pdf]

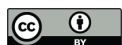

## *Supplement of*

# **A database of glacier prokaryotic genomes and genes for the Three Poles**

**Yongqin Liu et al.**

*Correspondence to:* Yongqin Liu (yql@lzu.edu.cn) and Mukan Ji (jimk@lzu.edu.cn)

- [essd-17-5165-2025-supplement-title-page.pdf](#)
- [supplementary file.xlsx](#)

The copyright of individual parts of the supplement might differ from the article licence.
